# Supplementary material for: Bayesian estimation of cell type–specific gene expression with prior derived from single-cell data
Source: Genome Res. 2021 Oct;31(10):1807–18. doi: 10.1101/gr.268722.120 (PMC8494232; doi:10.1101/gr.268722.120)
Supplement: Supplemental Material [file supp_gr.268722.120_Supplemental_Table_S1.xlsx]

## Sheet: caption
Supplementary Table 1: CTS-DEG-ASD and CTS-DEG-AD identified by bMIND. The column names are gene, cell type, q-value, and log2 fold change (case - control).

## Sheet: CTS-DEG-ASD
gene	cell	qval	log2FC
SFN	Astro	0.00131128	0.284363
HFM1	Astro	0.0260524	0.375786
EML6	Astro	0.000461021	-0.151544
IL1B	Astro	0.00460591	0.493833
KCNIP4	Astro	0.0053977	-0.189433
FSTL4	Astro	0.0206076	-0.175841
CTD-2050E21.1	Astro	0.000167383	-0.385326
PDE10A	Astro	0.00526969	-0.306702
IL6	Astro	0.0190354	0.334301
BMPER	Astro	0.00101506	-0.150702
XIST	Astro	0.00977816	-0.324645
DUSP4	Astro	0.00766123	-0.151757
RP11-399H11.3	Astro	0.00101506	-0.147554
SLC1A2	Astro	2.50899e-05	-0.285643
NPAS4	Astro	4.73644e-05	0.462214
NPTN	Astro	0.0123923	-0.153875
RP11-217B1.2	Astro	0.00666614	0.172673
CTD-2555A7.1	Astro	0.015089	0.147653
UNC45B	Astro	1.10846e-05	0.830595
GFAP	Astro	0.0149974	0.162412
LIF	Astro	0.0329946	0.479135
RP11-191L9.4	Astro	0.0128942	-0.217133
MT-ND6	Astro	0.00613192	0.485873
LINC00982	ExN	0.0332908	-0.320995
PRDM16	ExN	0.0494186	-0.225615
SLC25A33	ExN	0.0170413	-0.301472
PLA2G5	ExN	0.0196448	-0.41045
FAM76A	ExN	0.0400024	-0.152039
MFSD2A	ExN	0.0386	-0.185592
CCDC30	ExN	0.040447	-0.20139
ERMAP	ExN	0.0143301	-0.158651
TCTEX1D4	ExN	0.0240899	0.158427
AGBL4	ExN	0.0110175	-0.302618
EPS15	ExN	0.0180998	-0.239681
ECHDC2	ExN	0.0426143	-0.274479
LRP8	ExN	0.000823317	-0.274084
ACOT11	ExN	0.00110155	-0.504167
MROH7-TTC4	ExN	0.00849106	-0.40752
RP11-776H12.1	ExN	1.12827e-05	-0.444349
DOCK7	ExN	0.0030795	-0.212921
SLC44A5	ExN	0.00050615	-0.247459
LPHN2	ExN	0.00326948	-0.157156
COL24A1	ExN	0.00460591	-0.406178
GBP4	ExN	0.0388212	-0.30649
AGL	ExN	0.00311081	-0.290691
EXTL2	ExN	0.0050277	-0.333957
RP11-421L21.3	ExN	0.0057199	-0.274159
COL11A1	ExN	0.0114091	-0.236349
NTNG1	ExN	0.0303508	-0.221109
VAV3	ExN	0.0433743	-0.429187
GSTM2	ExN	0.0499582	-0.164732
ADORA3	ExN	0.0452128	0.155198
MAGI3	ExN	0.02459	-0.144187
PTGFRN	ExN	0.00322103	-0.325111
MAN1A2	ExN	0.0314697	-0.211707
WARS2	ExN	0.0252858	-0.156798
SELENBP1	ExN	0.0167169	-0.222137
C1orf61	ExN	0.00101506	-0.496398
ATP1A2	ExN	0.00481391	-0.475582
NIT1	ExN	0.0342041	-0.16043
RGS5	ExN	0.000667035	-0.419932
RXRG	ExN	0.0399332	-0.17927
DUSP27	ExN	0.0465027	-0.22971
DCAF6	ExN	0.00488155	-0.200355
NME7	ExN	0.0435352	-0.161511
PRDX6	ExN	0.0440153	-0.21991
BRINP2	ExN	0.0173156	-0.208576
CRB1	ExN	0.00841347	-0.298952
DENND1B	ExN	7.87019e-05	-0.319897
SHISA4	ExN	0.0256136	-0.171203
CD34	ExN	0.0332729	-0.402143
SMYD2	ExN	0.0256524	-0.212932
PTPN14	ExN	0.0291965	-0.281401
ESRRG	ExN	0.000955474	-0.441967
2020-03-01	ExN	0.00555449	-0.256448
SUSD4	ExN	0.0216639	-0.155602
NTPCR	ExN	0.0123207	-0.146841
CHRM3	ExN	0.0108347	-0.158502
KMO	ExN	0.00447163	-0.250912
OPN3	ExN	0.0139864	-0.22929
LINC00298	ExN	0.0162994	-0.246924
LINC00299	ExN	0.000218912	-0.615905
AC011747.3	ExN	0.041076	-0.308574
ASAP2	ExN	0.0256394	-0.181482
ROCK2	ExN	0.00380284	-0.140586
TRIB2	ExN	0.00623216	-0.574877
FAM49A	ExN	0.0102266	-0.27764
WDR35	ExN	0.0397658	-0.169803
EFR3B	ExN	0.045737	-0.194252
GAREML	ExN	0.03767	-0.3502
SLC5A6	ExN	0.013453	-0.232058
FNDC4	ExN	0.0326979	-0.384505
RMDN2	ExN	0.00351374	-0.262572
ATL2	ExN	0.000691578	-0.172923
SLC8A1	ExN	0.00503769	-0.256229
EPAS1	ExN	0.0249819	-0.257757
SOCS5	ExN	0.0401671	-0.155891
NRXN1	ExN	1.12827e-05	-0.387747
CLHC1	ExN	0.038776	-0.152623
UGP2	ExN	0.0284832	-0.232387
AC074391.1	ExN	0.00767749	-0.526218
ANTXR1	ExN	0.00900191	-0.181442
SFXN5	ExN	0.0169732	-0.222569
LRRTM4	ExN	7.90254e-05	-0.456904
CTNNA2	ExN	9.25339e-07	-0.56837
KCNIP3	ExN	0.0368964	-0.378977
ANKRD36	ExN	0.0159796	-0.214411
CHST10	ExN	0.0391049	-0.191929
LINC01102	ExN	0.049121	-0.156507
LINC01114	ExN	0.0149727	-0.24302
LINC01158	ExN	0.00465857	-0.218712
GCC2	ExN	0.0498657	-0.141806
ZC3H8	ExN	0.0053977	-0.185758
DPP10	ExN	0.000104156	-0.414191
PTPN4	ExN	0.0050277	-0.216138
INHBB	ExN	0.00142834	-0.212068
ARHGEF4	ExN	0.030956	-0.194191
NXPH2	ExN	0.00481391	-0.277586
LYPD6B	ExN	0.0359118	-0.259726
LYPD6	ExN	4.9872e-05	-0.399327
CACNB4	ExN	0.0140673	-0.166693
COBLL1	ExN	0.0473657	-0.223805
AC016723.4	ExN	0.00521534	-0.285115
FASTKD1	ExN	0.0153192	-0.147435
METAP1D	ExN	0.00407004	-0.270246
ITGA6	ExN	0.0347752	-0.175726
SCRN3	ExN	0.00744623	-0.160719
CHN1	ExN	0.000691578	-0.475841
OSBPL6	ExN	6.64103e-05	-0.295472
ZNF385B	ExN	0.0014996	-0.333744
UBE2E3	ExN	0.0169587	-0.179356
PMS1	ExN	0.00377136	-0.175105
DNAH7	ExN	2.75851e-05	-0.294949
ALS2CR12	ExN	0.00710677	-0.249504
TRAK2	ExN	0.0374138	-0.159612
BMPR2	ExN	0.00513028	-0.197432
MAP2	ExN	0.00134734	-0.50964
ERBB4	ExN	0.000924366	-0.330372
TMEM169	ExN	0.0251551	-0.14031
CCL20	ExN	0.000173031	0.186153
C2orf72	ExN	0.00733638	-0.24666
C2orf82	ExN	0.0193519	-0.429716
NGEF	ExN	0.0325434	-0.436588
D2HGDH	ExN	0.0473521	-0.261185
CHL1	ExN	0.000330692	-0.408918
CIDECP	ExN	0.0485307	-0.235254
SLC6A11	ExN	0.0152244	-0.324054
SLC6A1	ExN	0.0104019	-0.318043
WNT7A	ExN	0.00381746	-0.556814
ZNF385D	ExN	0.0377516	-0.271879
THRB	ExN	0.000186508	-0.304206
RARB	ExN	0.0171504	-0.248585
LRRC3B	ExN	0.00546874	-0.382882
NEK10	ExN	0.0476404	-0.162106
RBMS3-AS3	ExN	0.0030795	-0.189892
RBMS3	ExN	0.00637004	-0.284747
SNRK	ExN	0.0115209	-0.14979
CSPG5	ExN	0.0356683	-0.410322
SLC38A3	ExN	0.0328398	-0.282109
HYAL1	ExN	0.0288657	-0.195202
C3orf18	ExN	0.0358207	-0.2994
SEMA3G	ExN	0.00493242	-0.443123
PTPRG	ExN	0.015089	-0.232277
CADPS	ExN	0.00314914	-0.27
PDZRN3	ExN	0.0123774	-0.238014
ROBO2	ExN	0.0227757	-0.199937
CADM2	ExN	0.000806663	-0.357366
IMPG2	ExN	0.0132557	-0.209724
GRAMD1C	ExN	0.0029498	-0.371143
LSAMP	ExN	0.0117563	-0.259502
ARHGAP31	ExN	0.0397658	-0.223169
STXBP5L	ExN	0.000755378	-0.390982
EAF2	ExN	0.000667035	-0.251303
SLC15A2	ExN	0.000362442	-0.42372
KALRN	ExN	0.0123207	-0.340503
ENPP7P4	ExN	0.011903	-0.215949
MGLL	ExN	0.0314124	-0.152914
KBTBD12	ExN	0.0492779	-0.240494
EPHB1	ExN	0.0288164	-0.262981
RP11-319G6.1	ExN	0.0454643	-0.161518
RASA2	ExN	0.0100634	-0.174468
TRPC1	ExN	0.0117078	-0.166201
GPR149	ExN	0.00721934	-0.267324
TNIK	ExN	0.018457	-0.147882
NAALADL2	ExN	0.0328398	-0.29645
MFN1	ExN	0.0462545	-0.179269
PEX5L	ExN	0.0187729	-0.179041
DCUN1D1	ExN	0.0230727	-0.160291
ETV5	ExN	0.0016244	-0.559776
CCDC50	ExN	0.0329946	-0.164882
FGF12	ExN	0.00639712	-0.276044
ATP13A5	ExN	0.00389496	-0.284392
ATP13A4	ExN	0.0040977	-0.382465
ATP5I	ExN	0.0296116	-0.182073
FGFR3	ExN	0.00844017	-0.516348
CD38	ExN	0.0209147	-0.360955
TAPT1-AS1	ExN	0.0433304	-0.153896
SEL1L3	ExN	0.023247	-0.224373
TBC1D19	ExN	0.00386093	-0.204297
PCDH7	ExN	0.00351537	-0.335663
ARAP2	ExN	0.024294	-0.17543
GABRA2	ExN	0.000639785	-0.29673
GABRB1	ExN	0.000202319	-0.349853
NMU	ExN	0.000373427	-0.168886
AASDH	ExN	0.00215684	-0.159952
HOPX	ExN	0.0397018	-0.284344
LPHN3	ExN	0.00399391	-0.208056
SLC4A4	ExN	0.00109274	-0.466679
TMEM150C	ExN	0.0235989	-0.192039
MAPK10	ExN	0.000691578	-0.273163
SPARCL1	ExN	0.0209069	-0.407864
ABCG2	ExN	2.47981e-06	-0.705589
CCSER1	ExN	8.42625e-06	-0.358993
SLC39A8	ExN	0.000691578	-0.269734
PPA2	ExN	0.0201863	-0.144277
TBCK	ExN	0.00220707	-0.155128
COL25A1	ExN	0.0141981	-0.283945
SYNPO2	ExN	0.0293603	-0.266942
RP11-679C8.2	ExN	0.0290447	-0.311395
PRDM5	ExN	0.00343099	-0.320262
TRPC3	ExN	0.0324473	-0.348506
FBXW7	ExN	0.00211539	-0.345519
RNF175	ExN	0.0119431	-0.158347
FAM198B	ExN	0.0094537	-0.299854
RP11-597D13.9	ExN	0.00232833	-0.401005
CPE	ExN	0.0180998	-0.260419
NEK1	ExN	0.0260805	-0.142501
GPM6A	ExN	5.07105e-05	-0.538379
SRD5A1	ExN	0.0155344	-0.195185
ADCY2	ExN	0.00208452	-0.270989
CTNND2	ExN	0.00752226	-0.160028
CTD-2533K21.4	ExN	0.00169926	-0.169375
NNT	ExN	0.0139809	-0.220836
NDUFS4	ExN	0.0280556	-0.150538
ANKRD55	ExN	0.011833	-0.367598
PDE4D	ExN	0.00116622	-0.403572
MAST4	ExN	0.00262192	-0.346726
ENC1	ExN	0.000899988	-0.504678
ZFYVE16	ExN	0.00629282	-0.150708
HAPLN1	ExN	0.0315906	-0.371897
LINC00461	ExN	0.000511105	-0.399574
MEF2C	ExN	0.0168884	-0.191241
MEF2C-AS1	ExN	0.00535321	-0.213382
GPR98	ExN	0.00828652	-0.312313
LUCAT1	ExN	0.000192963	0.441799
NR2F1-AS1	ExN	8.98729e-06	-0.300501
KIAA0825	ExN	0.0332839	-0.1774
PPIP5K2	ExN	0.00407004	-0.252387
EFNA5	ExN	0.000251584	-0.400016
FBXL17	ExN	0.000646124	-0.280046
FER	ExN	0.0137469	-0.148886
TMEM232	ExN	0.00389361	-0.25715
APC	ExN	0.0363452	-0.141873
CDC42SE2	ExN	0.0374212	-0.140074
ACSL6	ExN	0.000128172	-0.2867
AC034220.3	ExN	0.0436385	-0.209976
ZCCHC10	ExN	0.0206976	-0.186104
CTC-321K16.1	ExN	0.0214299	-0.300055
NME5	ExN	0.000610873	-0.282945
PSD2	ExN	0.0292966	-0.472412
PFDN1	ExN	0.00632337	-0.173339
AC005592.2	ExN	0.00142834	-0.928863
ARHGAP26	ExN	0.0150341	-0.175778
KCTD16	ExN	0.0149099	-0.155432
PDGFRB	ExN	0.00685671	-0.280354
SGCD	ExN	0.00482137	-0.313382
ADRA1B	ExN	0.0357554	-0.415537
TENM2	ExN	0.00474507	-0.343951
WWC1	ExN	0.0350196	-0.171556
KCNIP1	ExN	0.0398339	-0.163133
SIRT5	ExN	0.0114554	-0.192718
RNF182	ExN	0.00440208	-0.417497
E2F3	ExN	0.0328841	-0.183847
CASC15	ExN	0.0440083	-0.193476
LRRC16A	ExN	0.00360351	-0.237377
PTCHD4	ExN	0.0131225	-0.200619
PAQR8	ExN	0.0361931	-0.232402
FBXO9	ExN	0.030265	-0.285405
LINC00680	ExN	0.00869117	-0.193089
KHDRBS2	ExN	0.00505374	-0.164716
BAI3	ExN	0.00451131	-0.359085
RIMS1	ExN	0.00983731	-0.223661
KCNQ5	ExN	0.0038249	-0.25681
COL12A1	ExN	0.0116962	-0.154472
BCKDHB	ExN	0.0307877	-0.218299
TPBG	ExN	0.0128942	-0.50837
NT5E	ExN	0.00306373	-0.224353
SNX14	ExN	0.00653731	-0.164655
FUT9	ExN	0.00138137	-0.315427
RP11-436D23.1	ExN	0.00101369	-0.38137
LACE1	ExN	0.0410129	-0.148402
ARMC2	ExN	0.000714022	-0.246225
NT5DC1	ExN	0.00888494	-0.189477
SLC35F1	ExN	0.0154873	-0.216955
CEP85L	ExN	0.00460591	-0.154009
TBC1D32	ExN	0.0016035	-0.17597
AKAP7	ExN	0.000955474	-0.16811
SLC18B1	ExN	0.00310227	-0.292809
AHI1	ExN	0.0320906	-0.157522
PDE7B	ExN	0.00156354	-0.485172
RP11-390P2.4	ExN	0.0479549	-0.247626
REPS1	ExN	0.00526088	-0.15008
NMBR	ExN	0.0476404	-0.205067
EPM2A	ExN	0.000405388	-0.256526
STXBP5	ExN	0.00105642	-0.262432
VIP	ExN	0.0160044	-0.594269
RSPH3	ExN	0.00322103	-0.259856
PARK2	ExN	0.0447976	-0.183672
GLCCI1	ExN	0.00101506	-0.237956
ICA1	ExN	0.00744083	-0.27513
NXPH1	ExN	0.000931902	-0.275494
THSD7A	ExN	0.00779425	-0.283863
DGKB	ExN	0.00109975	-0.328752
ISPD	ExN	0.00419497	-0.285258
TOMM7	ExN	0.0308268	-0.267836
MPP6	ExN	0.0425808	-0.161411
OSBPL3	ExN	0.0207224	-0.220057
HIBADH	ExN	0.0190354	-0.161414
2020-09-07	ExN	0.0453132	-0.188112
TNS3	ExN	0.0272651	-0.170445
ZPBP	ExN	0.00346263	-0.512414
EGFR	ExN	0.0215688	-0.319663
GBAS	ExN	0.00389496	-0.143037
LAT2	ExN	0.0379852	0.264256
MAGI2	ExN	0.0196808	-0.248459
GRM3	ExN	0.00593974	-0.251066
ABCB1	ExN	0.0290776	-0.239899
ZNF804B	ExN	7.6813e-07	-0.657647
CDK14	ExN	0.00145076	-0.230362
PPP1R9A	ExN	0.00349724	-0.169793
DLX6-AS1	ExN	0.0106916	-0.442949
DPY19L2P2	ExN	0.0177447	-0.211707
LAMB1	ExN	0.0169519	-0.274261
NRCAM	ExN	0.000667035	-0.168703
IMMP2L	ExN	0.040744	-0.168859
KCND2	ExN	0.00434977	-0.343506
CPED1	ExN	0.0168275	-0.148823
GRM8	ExN	0.0405993	-0.230859
AHCYL2	ExN	0.00734398	-0.288542
C7orf73	ExN	0.0379521	-0.150006
TPK1	ExN	0.0436256	-0.21671
CNTNAP2	ExN	0.00534317	-0.298632
GALNT11	ExN	0.0231514	-0.152459
ARSF	ExN	0.00732079	-0.315197
SHROOM2	ExN	0.0193519	-0.302533
FRMPD4	ExN	0.0196641	-0.209512
SLC38A5	ExN	8.64809e-05	-0.637455
CLCN5	ExN	0.0485307	-0.170913
OPHN1	ExN	0.0244534	-0.250402
PHKA1	ExN	0.00453985	-0.348472
CHIC1	ExN	0.00217076	-0.235781
DIAPH2	ExN	0.0420915	-0.141978
ZMAT1	ExN	0.0256661	-0.14501
PAK3	ExN	0.0162963	-0.157644
AMOT	ExN	0.0189013	-0.203842
GRIA3	ExN	0.049278	-0.191124
RAP2C-AS1	ExN	0.0316144	-0.236068
FGF13	ExN	0.0117318	-0.159687
LINC00894	ExN	0.0427609	-0.176032
KIAA1456	ExN	0.00114643	-0.314548
SGCZ	ExN	0.0363452	-0.212406
CSGALNACT1	ExN	0.0138571	-0.241659
LZTS1	ExN	0.0384	-0.442338
ADRA1A	ExN	0.0178957	-0.285106
SNTG1	ExN	0.0117078	-0.257342
TOX	ExN	0.00535515	-0.261683
NKAIN3	ExN	0.00207466	-0.337323
CRH	ExN	0.000186508	-0.861905
C8orf46	ExN	0.0467925	-0.305427
PREX2	ExN	0.0181177	-0.307459
EYA1	ExN	0.0363667	-0.326243
KCNB2	ExN	0.00750053	-0.317794
RDH10	ExN	0.0030795	0.17304
STAU2	ExN	0.00346744	-0.166017
HEY1	ExN	0.0495448	-0.272182
RP11-26J3.1	ExN	0.0120829	-0.309843
MMP16	ExN	0.00635071	-0.155058
DECR1	ExN	0.0212671	-0.183661
NIPAL2	ExN	0.0045106	-0.338524
NCALD	ExN	0.00310749	-0.310674
BAALC-AS1	ExN	0.0135444	-0.266237
RIMS2	ExN	0.000884906	-0.290237
OXR1	ExN	0.000427669	-0.360675
CSMD3	ExN	0.00616345	-0.164824
LRRC6	ExN	0.000543237	-0.248689
PES1P2	ExN	0.0303508	-0.16057
NUDT2	ExN	0.0222218	-0.160852
ENHO	ExN	0.0050277	-0.448176
PIP5K1B	ExN	0.048839	-0.199839
KLF9	ExN	0.0230727	-0.20953
TRPM3	ExN	0.0215281	-0.344091
ALDH1A1	ExN	0.00193381	-0.536445
RORB	ExN	0.00142834	-0.374481
VPS13A	ExN	0.00620022	-0.21908
KIF27	ExN	0.0480642	-0.158617
NTRK2	ExN	0.00454824	-0.205498
SHC3	ExN	0.020936	-0.340044
WDR31	ExN	0.0196704	-0.179879
GOLGA1	ExN	0.00199529	-0.243752
RABEPK	ExN	0.0235019	-0.215323
FAM78A	ExN	0.0268659	-0.207554
GVINP1	ExN	0.024861	-0.183515
PARVA	ExN	0.00621368	-0.163001
SOX6	ExN	0.00108115	-0.2626
PIK3C2A	ExN	0.0298813	-0.160462
ANO5	ExN	0.000841862	-0.274873
METTL15	ExN	0.0294939	-0.190053
MPPED2	ExN	4.33906e-06	-0.498172
DCDC1	ExN	0.0177517	-0.435789
ELP4	ExN	0.0463845	-0.17969
PAMR1	ExN	0.00629282	-0.316936
LRRC4C	ExN	0.0232684	-0.282537
LPXN	ExN	0.0276157	-0.197217
FTH1	ExN	0.0423751	0.190572
C11orf95	ExN	0.0444524	-0.290547
PYGM	ExN	0.0298934	-0.429404
TM7SF2	ExN	0.0444971	-0.335257
CPT1A	ExN	0.0479017	-0.192845
PRCP	ExN	0.0117523	-0.171512
GRM5	ExN	0.00209327	-0.192994
FAT3	ExN	7.31116e-05	-0.428662
DYNC2H1	ExN	0.00720735	-0.214197
GUCY1A2	ExN	0.00607302	-0.202775
ARHGAP20	ExN	0.00924338	-0.268747
OAF	ExN	0.0433743	-0.235375
SORL1	ExN	0.00470065	-0.237055
HSPA8	ExN	0.0240831	-0.357516
SIAE	ExN	0.039055	-0.222379
ITIH5	ExN	0.00084024	-0.544757
PHYH	ExN	0.0465086	-0.216388
NEBL	ExN	0.000854139	-0.188142
CASC10	ExN	0.0495474	-0.152325
ENKUR	ExN	0.0289473	-0.21811
ABI1	ExN	0.0139234	-0.140598
ANKRD26	ExN	0.00163682	-0.160473
ZEB1-AS1	ExN	0.023247	-0.228111
NRP1	ExN	0.00496345	-0.219927
ZNF248	ExN	0.0115024	-0.142495
MAPK8	ExN	0.00232833	-0.150088
PRKG1	ExN	0.00710677	-0.286913
RP11-556E13.1	ExN	0.0389352	0.163772
BICC1	ExN	0.0493112	-0.213372
PHYHIPL	ExN	0.00353849	-0.215109
RTKN2	ExN	0.0099088	-0.317977
TET1	ExN	0.00666614	-0.16148
STOX1	ExN	0.00629282	-0.267691
CFAP70	ExN	0.0252934	-0.154827
CAMK2G	ExN	0.000888956	-0.300228
KCNMA1	ExN	0.00710677	-0.257693
LINC00856	ExN	0.0333192	-0.27738
RP11-182L21.6	ExN	0.0443813	-0.153674
NRG3	ExN	0.000888314	-0.398643
PANK1	ExN	0.00511021	-0.229117
HECTD2	ExN	0.0196982	-0.27789
PPP1R3C	ExN	0.00632337	-0.339147
LGI1	ExN	0.00154032	-0.276915
SLC35G1	ExN	0.00130288	-0.308348
MARVELD1	ExN	0.00272782	-0.24728
HPSE2	ExN	0.000710871	-0.822195
ABLIM1	ExN	0.0331222	-0.148609
ATRNL1	ExN	1.12827e-05	-0.46049
UROS	ExN	0.0180998	-0.24955
CCND2	ExN	0.0295239	-0.309662
RERG	ExN	0.00152034	-0.402033
PTPRO	ExN	0.0201653	-0.158095
C2CD5	ExN	0.00166811	-0.227735
SOX5	ExN	0.000149072	-0.269218
RP11-444D3.1	ExN	0.00091044	-0.308102
RASSF8-AS1	ExN	0.00353659	-0.295874
ITPR2	ExN	0.0281627	-0.180226
TM7SF3	ExN	0.00821034	-0.151907
ARNTL2	ExN	0.0175627	-0.199658
ABCD2	ExN	2.11676e-05	-0.510513
LRRK2	ExN	0.0178516	-0.226702
ZNF641	ExN	0.00130288	-0.27095
BCDIN3D	ExN	0.00108115	-0.160749
LETMD1	ExN	0.0425085	-0.165201
GDF11	ExN	0.0356204	-0.226114
RP11-123O10.4	ExN	0.0056316	-0.182475
CAPS2	ExN	0.00127621	-0.314443
NAV3	ExN	0.0152138	-0.160725
SYT1	ExN	0.00641632	-0.347658
METTL25	ExN	0.00395347	-0.235299
MGAT4C	ExN	0.000314711	-0.353371
NUDT4	ExN	0.0202837	-0.252999
NDUFA12	ExN	0.0314697	-0.225898
FGD6	ExN	0.0240275	-0.191251
NTN4	ExN	0.035013	-0.263711
RMST	ExN	0.00019603	-0.435613
CHPT1	ExN	0.0010998	-0.221554
IGF1	ExN	0.0128613	-0.345607
ACACB	ExN	0.0465027	-0.272762
ANAPC7	ExN	0.0293498	-0.167614
TMEM132B	ExN	0.00449485	-0.262617
IL17D	ExN	0.0331436	-0.188232
WASF3	ExN	0.0301106	-0.153749
NBEA	ExN	0.00297135	-0.283389
VWA8	ExN	0.00666614	-0.181672
THSD1	ExN	0.00199529	-0.265925
VPS36	ExN	0.00485765	-0.234751
TDRD3	ExN	0.00623216	-0.200074
PCDH9	ExN	0.00247417	-0.24581
KLF12	ExN	0.000218922	-0.255977
TBC1D4	ExN	0.00338889	-0.150851
RNF219-AS1	ExN	0.0128942	-0.485574
GPC5	ExN	0.00666614	-0.406803
SOX21-AS1	ExN	0.00965812	-0.216312
UGGT2	ExN	0.00972211	-0.171024
CLYBL	ExN	0.042034	-0.356711
FGF14	ExN	0.0118162	-0.378422
FAM155A	ExN	6.47336e-05	-0.46616
CCNB1IP1	ExN	0.00666614	-0.191466
FOXG1-AS1	ExN	5.07105e-05	-0.252782
LRFN5	ExN	0.00262981	-0.22602
MDGA2	ExN	0.0310004	-0.191739
FRMD6	ExN	0.00372798	-0.40353
C14orf37	ExN	0.00526088	-0.240156
RHOJ	ExN	0.000405388	-0.383747
PAPLN	ExN	0.0168073	-0.421261
DNAL1	ExN	0.00825517	-0.228381
TMED8	ExN	0.00965812	-0.235505
FLRT2	ExN	0.000432629	-0.309998
SNHG14	ExN	0.00530729	-0.301187
FSIP1	ExN	0.0440419	-0.18786
CHP1	ExN	0.0463845	-0.299928
DMXL2	ExN	0.0162622	-0.251833
LYSMD2	ExN	0.0190168	-0.228917
TMOD2	ExN	0.00330594	-0.389916
CGNL1	ExN	0.00501947	-0.284006
RORA	ExN	0.0108347	-0.449905
ULK3	ExN	0.015089	-0.208681
LINC01314	ExN	0.00744623	-0.287877
MFGE8	ExN	0.0297507	-0.419098
RLBP1	ExN	0.0100356	-0.451183
PEX11A	ExN	0.0451514	-0.14568
ADAMTS17	ExN	0.0440153	-0.31797
SNRNP25	ExN	0.0299968	-0.302724
TNFRSF12A	ExN	9.24542e-05	0.594692
NETO2	ExN	0.030265	-0.327379
ABCC12	ExN	0.000106052	-0.628998
RPGRIP1L	ExN	0.000177239	-0.210469
BBS2	ExN	0.0318446	-0.182526
FAM192A	ExN	0.0162172	-0.160919
RP11-297D21.4	ExN	0.038344	-0.191533
CLEC18B	ExN	0.031069	0.204339
MAF	ExN	0.0245243	-0.258705
RILP	ExN	0.0476565	-0.321944
SLC13A5	ExN	0.000704434	-0.539091
COX10-AS1	ExN	0.0445722	-0.23853
ZSWIM7	ExN	0.0272651	-0.193596
AC004448.5	ExN	0.00569046	0.238402
NOS2P3	ExN	0.0119431	0.234698
CCL2	ExN	1.76062e-05	0.520523
PCTP	ExN	0.0404328	-0.186563
GDPD1	ExN	0.0138891	-0.210329
BCAS3	ExN	0.0240831	-0.167811
AMZ2	ExN	0.0153192	-0.278384
CTD-2378E21.1	ExN	0.00878962	-0.484322
APCDD1	ExN	0.0128942	-0.286548
CABLES1	ExN	0.0124192	-0.471641
ANKRD29	ExN	0.0404558	-0.231541
CDH2	ExN	0.0117434	-0.141169
KATNAL2	ExN	0.0453132	-0.151846
MAPK4	ExN	0.00145968	-0.211619
RP4-673D20.6	ExN	0.000309753	-0.351139
RP4-673D20.3	ExN	0.000755378	-0.42179
RP5-968J1.1	ExN	0.00051581	-0.363065
HSPA12B	ExN	0.0151491	-0.25416
GPCPD1	ExN	0.0014885	-0.47605
PLCB1	ExN	3.38407e-05	-0.558335
PLCB4	ExN	0.0382767	-0.190685
TASP1	ExN	0.00397207	-0.197535
SLC24A3	ExN	0.024057	-0.281511
CST3	ExN	0.0314697	-0.493954
ACSS1	ExN	0.0121331	-0.43469
FRG1B	ExN	0.00710677	-0.335756
SNTA1	ExN	0.0395238	-0.269401
ZHX3	ExN	0.0398101	-0.161663
ZNF334	ExN	0.00159835	-0.153259
NMRK2	ExN	0.0336812	0.216769
AC005523.3	ExN	0.0160781	0.200985
FUT6	ExN	0.00409412	0.145637
COL5A3	ExN	0.00139173	-0.879237
ICAM1	ExN	0.00146255	0.419604
GDF15	ExN	0.0304467	0.187669
ZNF98	ExN	0.000142192	-0.862689
SLC7A10	ExN	0.00191546	-0.438019
COX7A1	ExN	0.00488922	-0.562648
FAM83E	ExN	0.0131801	0.190381
ZSCAN5A	ExN	0.00978223	-0.226439
SLC25A18	ExN	0.00215684	-0.376165
PRODH	ExN	0.0258072	-0.488192
AIFM3	ExN	0.0475078	-0.279177
MIAT	ExN	0.0316701	-0.345637
CTA-929C8.8	ExN	0.039069	-0.410206
NIPSNAP1	ExN	0.0261023	-0.253758
RBFOX2	ExN	0.00940499	-0.148669
PVALB	ExN	0.00088954	-0.809086
MPPED1	ExN	0.0462435	-0.166647
PNPLA3	ExN	0.0153977	-0.374474
AP000473.5	ExN	0.0331999	-0.196353
D21S2088E	ExN	0.0361931	-0.160159
JAM2	ExN	0.0304736	-0.141248
GRIK1	ExN	0.00160913	-0.444466
BRWD1	ExN	0.0128942	-0.140943
YBEY	ExN	0.0477302	-0.160873
C1QA	InN	0.0399886	0.580358
FCER1G	InN	0.0318446	0.273368
LINC01354	InN	0.00380284	0.173829
HCLS1	InN	0.0383816	0.450196
KLHL6	InN	0.0279309	0.445046
RBM47	InN	0.0164197	0.455829
CDH10	InN	2.54605e-05	-0.150515
CD180	InN	0.032394	0.446842
HIST1H2BJ	InN	0.0252963	0.369974
HIST1H2AG	InN	0.0104396	0.364626
HIST1H2AI	InN	0.0247004	0.175862
RP11-90P13.1	InN	0.0340332	0.206807
SCIN	InN	0.0255774	0.804743
TMEM176B	InN	0.0358383	0.323662
BTK	InN	0.047079	0.297003
STC1	InN	0.0193519	0.347037
FERMT3	InN	0.0150346	0.415642
UCP2	InN	0.0477943	0.28095
CTSC	InN	0.0256978	0.333956
TMEM26	InN	0.0173156	0.357555
C3AR1	InN	0.0465265	0.263459
TOX3	InN	0.0363052	0.259296
LPCAT2	InN	0.0262111	0.269344
MILR1	InN	0.0361931	0.16542
CD300A	InN	0.0157083	0.403684
FOXJ1	InN	0.0329946	0.259923
HCK	InN	0.0453132	0.342542
TYROBP	InN	0.0457498	0.297076
APOC1	InN	0.00720741	0.402834
SLC1A5	InN	0.046796	0.237297
LAIR1	InN	0.0162904	0.406871
OSM	InN	0.00810271	0.203258
HMOX1	InN	0.000701266	0.627477
SPOCD1	Oligo	0.0162291	0.227094
ELAVL4	Oligo	0.00145968	-0.222031
ST6GALNAC5	Oligo	0.00070896	-0.194347
MIR137HG	Oligo	0.0313055	-0.154414
OLFM3	Oligo	5.16694e-05	-0.232442
RGS4	Oligo	0.00108115	-0.326119
C1orf115	Oligo	0.0298869	-0.143533
KCNJ3	Oligo	0.00353659	-0.165882
STAT4	Oligo	0.0435385	-0.29394
AC114765.1	Oligo	0.0129166	-0.322343
AC067956.1	Oligo	0.015089	-0.287965
CPNE4	Oligo	0.0413657	-0.159135
PAQR9	Oligo	0.0139531	-0.205076
SOWAHB	Oligo	1.66068e-06	-0.339982
RP11-321E2.3	Oligo	0.0245905	-0.26908
HCN1	Oligo	0.000104735	-0.210532
GABRA1	Oligo	0.00145076	-0.395973
RP3-416J7.4	Oligo	0.0254987	-0.206499
HSPA1A	Oligo	0.00386093	0.2522
MLIP	Oligo	0.00281743	-0.333571
POU6F2	Oligo	0.0376808	-0.154751
VSTM2A	Oligo	0.0246007	-0.18221
HSPB1	Oligo	0.00403382	0.256835
GS1-358P8.4	Oligo	0.0116359	-0.160071
KLHL4	Oligo	0.0413359	0.140182
GPRASP2	Oligo	0.0213654	-0.187381
PDP1	Oligo	0.00663757	-0.213807
KCNV1	Oligo	0.0128942	-0.270406
ELAVL2	Oligo	0.0207224	-0.193458
GDA	Oligo	0.0273545	-0.254494
PTPN3	Oligo	0.00306373	-0.234034
NELL1	Oligo	0.0248339	-0.170833
SYT13	Oligo	0.00511021	-0.297628
RP11-708B6.2	Oligo	0.0169683	-0.157384
C1QL3	Oligo	0.020973	-0.259897
RP11-4N23.1	Oligo	0.0217806	-0.151135
TESPA1	Oligo	0.00553403	-0.249509
FAM19A2	Oligo	0.0328398	-0.188359
WIF1	Oligo	0.00510463	-0.244699
KCNC2	Oligo	0.000734965	-0.213073
OTOGL	Oligo	0.00159505	-0.255783
LINC00507	Oligo	9.45199e-05	-0.338676
HTR2A	Oligo	0.00353849	-0.261016
RP11-355I22.2	Oligo	0.000211488	-0.255322
KCNH5	Oligo	0.00333181	-0.164021
NGFR	Oligo	0.0196982	0.189438
ADCYAP1	Oligo	0.00236404	-0.289968
KCNS1	Oligo	0.000433084	-0.534562
CBLN4	Oligo	0.00474446	-0.232329

## Sheet: CTS-DEG-AD
gene	cell	qval	log2FC	data
KCNAB2	Astro	0.00117372	-0.0130309	Mayo
CHD5	Astro	0.00538033	-0.0583622	Mayo
CAMTA1	Astro	2.05814e-06	-0.0223875	Mayo
KAZN	Astro	0.00105154	-0.0209179	Mayo
IGSF21	Astro	0.0112128	-0.0263355	Mayo
EXTL1	Astro	1.10082e-05	-0.0806254	Mayo
ZDHHC18	Astro	0.0170932	-0.0177718	Mayo
AHDC1	Astro	3.76047e-06	-0.00218846	Mayo
IFI6	Astro	0.000833665	-0.0942268	Mayo
KIAA1522	Astro	0.000287468	0.0072859	Mayo
DLGAP3	Astro	0.00197073	-0.0292977	Mayo
SH3D21	Astro	0.0231717	-0.065148	Mayo
POMGNT1	Astro	4.94964e-05	-0.010222	Mayo
LMO4	Astro	0.000766625	0.00345264	Mayo
PLPPR5	Astro	5.00512e-07	-0.0743573	Mayo
KIAA1324	Astro	0.00112639	-0.0248987	Mayo
CELF3	Astro	0.00934841	-0.0307525	Mayo
RGS4	Astro	0.000207415	-0.0964261	Mayo
NME7	Astro	0.000682243	-0.0472685	Mayo
BRINP2	Astro	6.57938e-05	-0.0272492	Mayo
KIF21B	Astro	0.00140631	-0.0216134	Mayo
PLEKHA6	Astro	0.000486985	0.0137011	Mayo
CNIH3	Astro	0.00093712	-0.0358421	Mayo
ARV1	Astro	0.00935397	-0.0189324	Mayo
HPCAL1	Astro	0.000619425	-0.0310149	Mayo
KCNF1	Astro	3.3273e-08	-0.101189	Mayo
FAM84A	Astro	0.00123702	-0.0104545	Mayo
MAPRE3	Astro	0.000574533	-0.0321615	Mayo
MPV17	Astro	0.00108633	-0.0154287	Mayo
TMEM178A	Astro	4.17115e-05	-0.119609	Mayo
SLC8A1	Astro	0.00548999	-0.0464463	Mayo
ACYP2	Astro	0.00109611	-0.0213101	Mayo
BCL11A	Astro	7.33227e-05	-0.0434596	Mayo
WBP1	Astro	4.47033e-07	-0.0453005	Mayo
LRRTM1	Astro	0.000148797	-0.0435571	Mayo
KCNIP3	Astro	0.000298618	-0.0519183	Mayo
KIAA1211L	Astro	0.00428418	-0.00136689	Mayo
TMEM163	Astro	6.05132e-05	-0.0781394	Mayo
SCN1A	Astro	0.00544337	-0.0498734	Mayo
SATB2	Astro	0.010618	0.0230908	Mayo
RUFY4	Astro	0.00043479	-0.034669	Mayo
SPEG	Astro	0.0204982	-0.0247457	Mayo
SCG2	Astro	3.64156e-06	-0.160239	Mayo
KIF1A	Astro	0.00118527	-0.00338008	Mayo
PRRT3	Astro	0.00101155	-0.022916	Mayo
ZNF385D	Astro	1.96999e-06	-0.114064	Mayo
THRB	Astro	0.00139176	0.0059368	Mayo
TMA7	Astro	3.80506e-06	-0.0445866	Mayo
CACNA2D2	Astro	0.000758976	-0.0223178	Mayo
GRM2	Astro	0.016561	-0.0115364	Mayo
KALRN	Astro	0.000229782	-0.0305444	Mayo
PODXL2	Astro	3.87655e-05	-0.057315	Mayo
CPNE4	Astro	0.0255112	-0.0395672	Mayo
SERPINI1	Astro	0.0124782	-0.0441129	Mayo
EIF5A2	Astro	0.0380247	-0.0116008	Mayo
CAMK2N2	Astro	0.00021214	-0.0458126	Mayo
TNK2	Astro	0.0276007	-0.0244717	Mayo
ATP5I	Astro	6.54794e-08	-0.0453631	Mayo
CPLX1	Astro	5.96722e-05	-0.130396	Mayo
DGKQ	Astro	0.00101861	-0.0286919	Mayo
LETM1	Astro	0.000366531	-0.00809728	Mayo
JAKMIP1	Astro	4.59297e-06	-0.00160237	Mayo
PCDH7	Astro	0.00158057	-0.00836064	Mayo
OCIAD2	Astro	9.77412e-06	-0.03933	Mayo
FRAS1	Astro	0.0154712	-0.00547772	Mayo
ARHGAP24	Astro	0.0154274	-0.00543847	Mayo
FBXW7	Astro	4.10737e-06	-0.0954097	Mayo
NKD2	Astro	0.002429	-0.0496191	Mayo
TRIO	Astro	3.81253e-05	0.00887589	Mayo
CDH10	Astro	8.01503e-05	-0.030759	Mayo
SGTB	Astro	0.000264515	-0.0306397	Mayo
SV2C	Astro	0.0217705	-0.103025	Mayo
REEP2	Astro	0.000850772	-0.0262853	Mayo
KCTD16	Astro	0.0089769	0.0309777	Mayo
SLC6A7	Astro	8.3692e-05	-0.103411	Mayo
CAMK2A	Astro	0.00425225	-0.0261342	Mayo
SYNPO	Astro	0.0105453	-0.0313725	Mayo
TENM2	Astro	0.000706048	-0.0294055	Mayo
FBLL1	Astro	2.80119e-05	-0.0489953	Mayo
SFXN1	Astro	0.000292749	-0.0109145	Mayo
RNF44	Astro	0.0027363	-0.0156268	Mayo
SNCB	Astro	0.00374074	-0.0355002	Mayo
UNC5A	Astro	0.0222732	0.0295887	Mayo
RGS14	Astro	0.0174921	0.0146555	Mayo
TRIM41	Astro	4.23589e-05	-0.0634675	Mayo
TMEM14B	Astro	2.05425e-05	-0.0251752	Mayo
PHACTR1	Astro	3.07482e-05	-0.0140868	Mayo
RBM24	Astro	0.00135439	0.0131392	Mayo
C6orf136	Astro	0.000403856	-0.0197041	Mayo
PRRC2A	Astro	0.00122773	0.00184185	Mayo
PFDN6	Astro	0.000154918	-0.0204152	Mayo
FRS3	Astro	0.000119414	-0.0415738	Mayo
SRF	Astro	0.00327099	-0.00343641	Mayo
TMEM63B	Astro	8.93422e-07	-0.0497665	Mayo
TMEM151B	Astro	0.00111826	-0.0433024	Mayo
RIMS1	Astro	0.000151801	-0.0841773	Mayo
FHL5	Astro	4.23224e-07	0.16731	Mayo
SLC35F1	Astro	0.000883425	-0.0145977	Mayo
ADAP1	Astro	0.00716025	-0.0333259	Mayo
TNRC18	Astro	0.0132803	-0.00449149	Mayo
CYTH3	Astro	0.000495899	-8.47944e-05	Mayo
WIPF3	Astro	0.00934494	-0.0127444	Mayo
NEUROD6	Astro	3.45596e-05	-0.21231	Mayo
AOAH	Astro	0.00985359	-0.0469401	Mayo
CCM2	Astro	0.000173161	-0.0330242	Mayo
LIMK1	Astro	0.00118802	-0.0335742	Mayo
RUNDC3B	Astro	5.42914e-05	-0.0290163	Mayo
NYAP1	Astro	0.00787106	-0.0202399	Mayo
ACHE	Astro	0.000790557	-0.023158	Mayo
MUC12	Astro	0.000155712	-0.0651349	Mayo
PRKAR2B	Astro	0.00162233	0.0243844	Mayo
GPR85	Astro	0.0239446	-0.0179833	Mayo
FEZF1	Astro	0.013904	-0.0273369	Mayo
LRRC4	Astro	0.000406695	0.00337058	Mayo
EPHB6	Astro	0.0300193	-0.0116647	Mayo
ZNF746	Astro	2.58336e-05	0.011284	Mayo
SHH	Astro	0.00026406	-0.0611971	Mayo
PTPRN2	Astro	0.00181719	-0.0237597	Mayo
TMSB4X	Astro	5.14581e-12	-0.0619902	Mayo
PCSK1N	Astro	0.00078593	-0.0603714	Mayo
FGD1	Astro	0.00075769	-0.0165952	Mayo
FAM155B	Astro	6.85725e-05	0.0054619	Mayo
DRP2	Astro	0.000134319	-0.0321825	Mayo
GRIA3	Astro	6.0811e-07	-0.0666987	Mayo
PRRG3	Astro	0.00126782	-0.00839183	Mayo
PDZD4	Astro	0.00129484	-0.0253841	Mayo
DLGAP2	Astro	0.000404034	-0.0429392	Mayo
LZTS1	Astro	0.00034677	-0.0407817	Mayo
NPM2	Astro	2.41521e-05	-0.0302642	Mayo
DMTN	Astro	0.00108005	-0.00772086	Mayo
RHOBTB2	Astro	0.000236788	-0.0102017	Mayo
NCALD	Astro	1.74369e-07	-0.110994	Mayo
RIMS2	Astro	0.000251527	-0.0370384	Mayo
KCNQ3	Astro	0.0268295	-0.0289297	Mayo
KHDRBS3	Astro	0.00645462	-0.0210661	Mayo
LYNX1	Astro	0.0118605	-0.0282012	Mayo
FBXL6	Astro	0.00239647	-0.0269996	Mayo
KIFC2	Astro	0.00294772	-0.0292041	Mayo
WNK2	Astro	0.00381349	-0.0140967	Mayo
C9orf91	Astro	0.005579	0.00338866	Mayo
DAB2IP	Astro	1.4566e-05	0.00686493	Mayo
PIP5KL1	Astro	4.96031e-06	-0.0586235	Mayo
ADAMTSL2	Astro	0.0326566	-0.0672454	Mayo
SOHLH1	Astro	0.00250359	-0.0481269	Mayo
KCNT1	Astro	0.0124116	-0.0617675	Mayo
C9orf69	Astro	0.00808811	-0.006414	Mayo
FAM69B	Astro	0.00087992	-0.019272	Mayo
GRIN1	Astro	0.00428299	-0.0366651	Mayo
RNF208	Astro	0.0064171	-0.0325698	Mayo
LRRC56	Astro	0.0389349	-0.0170877	Mayo
CEND1	Astro	2.44917e-05	-0.0786084	Mayo
DUSP8	Astro	0.0416588	-0.0160524	Mayo
KCNC1	Astro	0.0238326	0.0110047	Mayo
LRRC4C	Astro	0.015851	-0.00213096	Mayo
PRDM11	Astro	0.000669641	0.00339515	Mayo
CHST1	Astro	0.0216149	-0.00253599	Mayo
DGKZ	Astro	0.0021191	-0.0269101	Mayo
RTN4RL2	Astro	0.0133519	0.00814623	Mayo
DAGLA	Astro	3.42739e-05	0.000296831	Mayo
DNAJC4	Astro	1.56114e-05	-0.0334202	Mayo
GAL3ST3	Astro	0.0079959	-0.0113044	Mayo
KLC2	Astro	0.00685187	-0.0198688	Mayo
ADRBK1	Astro	0.00182267	-0.0209605	Mayo
SHANK2	Astro	0.00629506	-0.0340652	Mayo
PDE2A	Astro	0.0146108	0.000708406	Mayo
GRM5	Astro	0.0044186	-0.0132453	Mayo
RAB39A	Astro	0.00556802	-0.0257065	Mayo
NRGN	Astro	0.00738328	-0.0192165	Mayo
PKNOX2	Astro	2.4123e-06	-0.0320233	Mayo
ARHGAP22	Astro	6.21269e-07	-0.046768	Mayo
OGDHL	Astro	1.75549e-07	-0.0602296	Mayo
CNNM1	Astro	0.000500691	0.02215	Mayo
NDUFB8	Astro	9.29402e-06	-0.0419336	Mayo
PSD	Astro	0.00979215	-0.0200089	Mayo
FBXL15	Astro	0.00361647	-0.00778924	Mayo
USMG5	Astro	5.90652e-07	-0.0380368	Mayo
NEURL1	Astro	0.000283409	-0.0302533	Mayo
SORCS3	Astro	0.000435361	-0.0512228	Mayo
SORCS1	Astro	0.00220326	-0.0129934	Mayo
ADRA2A	Astro	0.00173551	-0.0169573	Mayo
BNIP3	Astro	0.00269946	-0.0469264	Mayo
DPYSL4	Astro	0.000192644	-0.0474995	Mayo
ADGRA1	Astro	0.000568362	-0.0455316	Mayo
IQSEC3	Astro	0.00681806	-0.0256615	Mayo
PIANP	Astro	0.00199431	-0.0290586	Mayo
C12orf57	Astro	3.20859e-05	-0.0327557	Mayo
AMN1	Astro	0.000104582	-0.0295634	Mayo
RND1	Astro	0.00199431	-0.0228054	Mayo
WNT10B	Astro	0.000166693	-0.0669478	Mayo
DDN	Astro	0.0358923	-0.0235407	Mayo
TUBA1B	Astro	0.0058788	-0.0680807	Mayo
KCNH3	Astro	0.00070083	-0.0426947	Mayo
NCKAP5L	Astro	0.0131122	-0.0187836	Mayo
PDE1B	Astro	0.00117855	-0.0174279	Mayo
SLC26A10	Astro	0.0073147	-0.013499	Mayo
NDUFA12	Astro	2.03592e-05	-0.0197261	Mayo
NTN4	Astro	0.00796269	-0.0362017	Mayo
C12orf45	Astro	0.00163738	-0.0182063	Mayo
RPH3A	Astro	1.39683e-08	-0.358529	Mayo
TPCN1	Astro	0.0489876	-0.0502445	Mayo
TESC	Astro	0.00114757	-0.0274599	Mayo
CCDC64	Astro	0.00116442	-0.00219875	Mayo
CABP1	Astro	0.00219702	-0.0517411	Mayo
TMEM120B	Astro	0.0264216	-0.0254568	Mayo
PITPNM2	Astro	0.00134133	0.00245739	Mayo
RIMBP2	Astro	9.30295e-05	-0.0518515	Mayo
MMP17	Astro	0.0142928	-0.0394784	Mayo
GALNT9	Astro	0.00193855	-0.0217547	Mayo
SERP2	Astro	0.00311993	-0.00974802	Mayo
FAM155A	Astro	2.20316e-05	-0.0150665	Mayo
MYO16	Astro	0.0371857	-0.0323045	Mayo
TEX29	Astro	0.000632286	-0.0830985	Mayo
GAS6	Astro	0.0208543	-0.0129163	Mayo
SSTR1	Astro	0.00743903	-0.0356483	Mayo
VASH1	Astro	0.0225089	-0.0302448	Mayo
EVL	Astro	0.000507784	-0.0498634	Mayo
BEGAIN	Astro	0.000367937	-0.0436943	Mayo
PLD4	Astro	0.00788541	-0.110589	Mayo
GABRA5	Astro	0.043979	-0.0216797	Mayo
FAM189A1	Astro	0.0115033	-0.00645051	Mayo
LPCAT4	Astro	0.000135241	-0.0273197	Mayo
HYPK	Astro	0.000246097	-0.0323445	Mayo
UNC13C	Astro	0.00478194	-0.0754729	Mayo
LINGO1	Astro	0.000994635	-0.0278061	Mayo
ARHGDIG	Astro	0.000261482	-0.0606328	Mayo
RAB11FIP3	Astro	0.0142404	-0.00559761	Mayo
C16orf13	Astro	0.000253344	-0.0258583	Mayo
FBXL16	Astro	0.002363	-0.0207116	Mayo
FLYWCH2	Astro	5.38853e-05	-0.0189972	Mayo
ADCY9	Astro	2.01533e-06	0.0180162	Mayo
PAM16	Astro	9.75384e-06	-0.0317045	Mayo
SH2B1	Astro	0.0384608	-0.0126978	Mayo
ASPHD1	Astro	1.55862e-10	-0.134833	Mayo
TAOK2	Astro	0.0489425	-0.00795827	Mayo
FAM57B	Astro	0.02306	-0.0120313	Mayo
FBRS	Astro	0.00906572	-0.0210034	Mayo
FBXL19	Astro	0.0174819	-0.0285332	Mayo
ZNF646	Astro	0.0315009	-0.00494383	Mayo
CX3CL1	Astro	0.00224078	-0.00138506	Mayo
MMP15	Astro	0.00479035	-0.0152576	Mayo
EXOC3L1	Astro	0.00910028	-0.0342875	Mayo
RLTPR	Astro	0.00887344	-0.0319106	Mayo
ST3GAL2	Astro	0.046847	-0.0181912	Mayo
CDH13	Astro	4.01284e-05	-0.0633667	Mayo
JPH3	Astro	0.000967541	-0.0214441	Mayo
CPNE7	Astro	0.000561265	-0.0702755	Mayo
SPIRE2	Astro	0.000663588	-0.0251251	Mayo
CLUH	Astro	0.00331548	-0.0137084	Mayo
SPNS2	Astro	0.000236313	-0.042711	Mayo
ARRB2	Astro	0.00172534	-0.0172973	Mayo
PITPNM3	Astro	0.000595216	-0.0148688	Mayo
LRRC75A	Astro	0.000138303	-0.0442247	Mayo
SARM1	Astro	0.0336392	0.00179463	Mayo
NEUROD2	Astro	0.0294345	-0.0138771	Mayo
ATXN7L3	Astro	0.00221419	-0.0110734	Mayo
ADAM11	Astro	5.00685e-06	-0.0851	Mayo
SAMD14	Astro	2.42442e-05	-0.0561673	Mayo
PPP1R9B	Astro	0.0105404	-0.0168775	Mayo
ACE	Astro	0.00365888	-0.00253911	Mayo
LIMD2	Astro	1.94591e-05	-0.0577158	Mayo
SDK2	Astro	0.0292428	-0.020869	Mayo
RNF157	Astro	0.00247503	-0.0143468	Mayo
RBFOX3	Astro	0.00534021	0.000453378	Mayo
KCTD1	Astro	0.000244231	0.00477989	Mayo
CBLN2	Astro	0.0123798	0.0212047	Mayo
TSHZ1	Astro	5.77521e-06	0.0113874	Mayo
PQLC1	Astro	8.45594e-05	-0.032199	Mayo
TMEM74B	Astro	0.0100849	-0.0406639	Mayo
SNPH	Astro	0.00336012	-0.00881751	Mayo
C20orf27	Astro	0.000744309	-0.028029	Mayo
PLCB1	Astro	7.08617e-06	-0.062959	Mayo
PTPRT	Astro	0.00447355	0.0187702	Mayo
RIMS4	Astro	0.000238059	0.0083023	Mayo
HRH3	Astro	0.0371565	-0.0177635	Mayo
NTSR1	Astro	0.0137382	-0.0542415	Mayo
KCNQ2	Astro	0.0129463	-0.0290691	Mayo
STMN3	Astro	0.00012572	-0.0454492	Mayo
BTBD2	Astro	0.00220865	-0.0237783	Mayo
LMNB2	Astro	0.0121356	-0.00538213	Mayo
AES	Astro	0.000904698	-0.023316	Mayo
GNA11	Astro	0.0231101	-0.00319034	Mayo
MATK	Astro	0.00372836	-0.0397667	Mayo
ATCAY	Astro	3.4343e-06	-0.0346906	Mayo
EEF2	Astro	0.0233883	-0.0108685	Mayo
ZBTB7A	Astro	0.0331834	0.0027376	Mayo
MAP2K2	Astro	0.000641119	-0.0255981	Mayo
ANKRD24	Astro	3.69839e-05	-0.0675351	Mayo
SHD	Astro	0.000164445	-0.0908075	Mayo
TMIGD2	Astro	0.000627387	-0.0780916	Mayo
FSD1	Astro	0.01533	-0.0373935	Mayo
SEMA6B	Astro	0.0286901	-0.0208004	Mayo
CAMSAP3	Astro	0.000565587	-0.000771696	Mayo
PRR36	Astro	0.000462135	-0.0256455	Mayo
PDE4A	Astro	0.000387837	-0.0265093	Mayo
MAST1	Astro	0.0154044	-0.00915006	Mayo
NACC1	Astro	0.0377989	-0.0103393	Mayo
CACNA1A	Astro	0.00548999	-0.0691375	Mayo
ADGRL1	Astro	0.0361282	-0.0204938	Mayo
WIZ	Astro	6.36964e-07	-0.00235275	Mayo
ABHD8	Astro	0.0130317	-0.00630171	Mayo
MAST3	Astro	0.0100118	-0.01633	Mayo
CRTC1	Astro	0.00794092	-0.0322672	Mayo
TSHZ3	Astro	0.000548727	0.00159195	Mayo
FXYD7	Astro	1.1502e-05	-0.0831802	Mayo
SIPA1L3	Astro	0.00322189	-0.00934149	Mayo
GGN	Astro	0.000343046	-0.0391661	Mayo
TTC9B	Astro	0.00123448	-0.0319919	Mayo
SPTBN4	Astro	0.010307	-0.0293605	Mayo
CLPTM1	Astro	0.00218602	-0.0117015	Mayo
MYPOP	Astro	0.00040126	-0.0218124	Mayo
IGFL4	Astro	0.0316625	-0.0582486	Mayo
LMTK3	Astro	0.0366698	-0.00606422	Mayo
DBP	Astro	0.00259535	-0.0231071	Mayo
PPFIA3	Astro	0.00131077	-0.0372855	Mayo
KCNC3	Astro	0.0146164	-0.0508846	Mayo
SYT3	Astro	0.00761785	-0.0179559	Mayo
SHANK1	Astro	0.0302586	-0.0235379	Mayo
IGLON5	Astro	0.000514952	-0.0609439	Mayo
CACNG7	Astro	0.00769885	-0.0165176	Mayo
CACNG8	Astro	0.000401074	-0.0565524	Mayo
BRSK1	Astro	0.000214801	-0.0568908	Mayo
RPL28	Astro	6.99379e-06	-0.0376501	Mayo
TANGO2	Astro	0.00992942	-0.0208644	Mayo
RANBP1	Astro	6.32337e-05	-0.0193608	Mayo
P2RX6	Astro	0.000282347	-0.102343	Mayo
YDJC	Astro	0.00209913	-0.0160491	Mayo
VPREB3	Astro	0.000279942	-0.0331312	Mayo
CHCHD10	Astro	7.23753e-07	-0.0461667	Mayo
SEZ6L	Astro	0.0002477	-0.036572	Mayo
RHBDD3	Astro	0.000246251	-0.0313099	Mayo
NF2	Astro	0.00019396	-0.00632603	Mayo
UQCR10	Astro	1.47251e-06	-0.0358803	Mayo
CCDC157	Astro	0.00183727	-0.0229124	Mayo
RASD2	Astro	0.0190384	-0.010596	Mayo
KCTD17	Astro	0.00261321	-0.0204154	Mayo
ELFN2	Astro	0.0109762	-0.0183171	Mayo
KCNJ4	Astro	0.00634447	-0.00859274	Mayo
CACNA1I	Astro	0.0439022	0.0227776	Mayo
ACO2	Astro	0.000262635	-0.0203451	Mayo
MPPED1	Astro	0.000113512	-0.0375372	Mayo
KIAA1644	Astro	0.0116644	-0.0111815	Mayo
PANX2	Astro	0.0486114	-0.0222427	Mayo
MAPK8IP2	Astro	0.000259847	-0.0564157	Mayo
SHANK3	Astro	0.00128982	-0.00550028	Mayo
KCNJ6	Astro	0.00216864	-0.00710414	Mayo
PDXK	Astro	0.00062496	-0.0125711	Mayo
TNFRSF18	ExN	0.00053586	-0.289466	Mayo
PRKCZ	ExN	2.50009e-05	-0.318785	Mayo
TPRG1L	ExN	1.10845e-05	-0.0456625	Mayo
CEP104	ExN	0.00358877	0.187139	Mayo
ACOT7	ExN	0.000180745	-0.205599	Mayo
PARK7	ExN	0.00296152	-0.0663433	Mayo
KIF1B	ExN	1.12855e-05	0.309368	Mayo
UBIAD1	ExN	0.00198392	0.230601	Mayo
VPS13D	ExN	1.05814e-06	0.345637	Mayo
PDPN	ExN	3.39457e-05	0.690154	Mayo
SPEN	ExN	0.000361334	0.245078	Mayo
SDHB	ExN	0.00205694	-0.056176	Mayo
ARHGEF10L	ExN	3.67019e-07	0.351745	Mayo
UBR4	ExN	0.00538845	0.271914	Mayo
CAMK2N1	ExN	4.93858e-05	-0.27201	Mayo
KIF17	ExN	0.0016952	-0.120736	Mayo
SH2D5	ExN	1.082e-06	-0.307538	Mayo
PITHD1	ExN	0.00010477	-0.192235	Mayo
IFNLR1	ExN	0.000567396	0.335758	Mayo
CLIC4	ExN	6.65804e-06	0.729872	Mayo
STMN1	ExN	1.67029e-06	-0.34384	Mayo
PAFAH2	ExN	0.00234445	0.116237	Mayo
CEP85	ExN	0.000802079	0.0287097	Mayo
ARID1A	ExN	0.000209449	0.29539	Mayo
TRNP1	ExN	2.0686e-05	-0.171051	Mayo
WASF2	ExN	4.27772e-05	0.41398	Mayo
XKR8	ExN	0.00875562	0.211435	Mayo
DNAJC8	ExN	0.00308539	0.00396607	Mayo
YTHDF2	ExN	0.000524164	-0.0124792	Mayo
MECR	ExN	4.36173e-05	-0.284342	Mayo
ZCCHC17	ExN	5.12534e-06	-0.264002	Mayo
FABP3	ExN	0.00588685	-0.128878	Mayo
PEF1	ExN	1.7567e-05	-0.188764	Mayo
HDAC1	ExN	0.0491505	0.160271	Mayo
FNDC5	ExN	1.32755e-07	-0.495948	Mayo
HPCA	ExN	1.96613e-06	-0.344049	Mayo
TRIM62	ExN	0.000509956	-0.0490453	Mayo
ZSCAN20	ExN	0.000273031	0.353274	Mayo
CSMD2	ExN	0.0497326	0.0712595	Mayo
SMIM12	ExN	7.73105e-06	-0.117806	Mayo
PSMB2	ExN	0.00103853	-0.18693	Mayo
AGO3	ExN	0.00935397	0.178759	Mayo
TRAPPC3	ExN	0.000196814	-0.0406893	Mayo
OSCP1	ExN	0.00053253	-0.0710954	Mayo
MEAF6	ExN	1.97754e-07	-0.205442	Mayo
MTF1	ExN	0.00017418	0.227798	Mayo
UTP11L	ExN	0.0053754	-0.0543427	Mayo
MACF1	ExN	0.000143794	0.411153	Mayo
BMP8A	ExN	0.00642109	-0.0225951	Mayo
SMAP2	ExN	1.67493e-05	-0.182426	Mayo
HIVEP3	ExN	0.0148791	0.129608	Mayo
ATP6V0B	ExN	8.57851e-06	-0.277777	Mayo
SLC6A9	ExN	6.01935e-06	0.490108	Mayo
ERI3	ExN	0.000240511	-0.10057	Mayo
UROD	ExN	0.00299177	-0.0902888	Mayo
LURAP1	ExN	0.023857	-0.0408193	Mayo
EFCAB14	ExN	3.26998e-08	0.395669	Mayo
ELAVL4	ExN	0.000710441	-0.155541	Mayo
PRPF38A	ExN	0.000534246	0.112815	Mayo
ZCCHC11	ExN	0.000898532	0.302824	Mayo
USP24	ExN	1.98037e-06	0.290146	Mayo
HOOK1	ExN	0.000107809	-0.138918	Mayo
KANK4	ExN	0.00203785	-0.118831	Mayo
PDE4B	ExN	0.000349188	0.341742	Mayo
NEGR1	ExN	0.000470918	-0.284913	Mayo
ERICH3	ExN	0.000842376	-0.208389	Mayo
ST6GALNAC3	ExN	3.26672e-08	0.730968	Mayo
ST6GALNAC5	ExN	0.00166947	-0.217751	Mayo
FUBP1	ExN	0.00166081	0.249678	Mayo
SH3GLB1	ExN	2.43357e-09	0.385137	Mayo
PKN2	ExN	1.57275e-05	0.341416	Mayo
LRRC8B	ExN	3.35732e-05	-0.262982	Mayo
BTBD8	ExN	0.00961784	0.188656	Mayo
PLPPR4	ExN	0.00377635	-0.0458614	Mayo
TRMT13	ExN	0.00785844	-0.0249414	Mayo
NTNG1	ExN	1.45912e-06	-0.156863	Mayo
GPSM2	ExN	0.000354075	0.215229	Mayo
WDR47	ExN	0.00401045	-0.00562055	Mayo
PSMA5	ExN	0.000122099	-0.155852	Mayo
SLC6A17	ExN	3.86052e-05	-0.237873	Mayo
RBM15	ExN	0.0225806	0.184381	Mayo
LAMTOR5	ExN	5.83652e-05	-0.11218	Mayo
CEPT1	ExN	0.00511042	0.187156	Mayo
CTTNBP2NL	ExN	2.44644e-05	0.304188	Mayo
BCAS2	ExN	1.19807e-05	-0.221917	Mayo
PEX11B	ExN	5.12534e-06	-0.119981	Mayo
FMO5	ExN	0.0171658	0.196887	Mayo
BOLA1	ExN	0.000579189	-0.0837545	Mayo
ENSA	ExN	6.34931e-06	-0.210401	Mayo
ARNT	ExN	0.00784415	0.118681	Mayo
FAM63A	ExN	5.87428e-07	0.383461	Mayo
CDC42SE1	ExN	0.00695941	0.102408	Mayo
PSMD4	ExN	0.000178825	-0.174881	Mayo
ZNF687	ExN	0.000100159	0.173292	Mayo
MRPL9	ExN	2.97499e-06	-0.11818	Mayo
NPR1	ExN	0.000254324	0.48904	Mayo
TPM3	ExN	0.00659188	-0.0109341	Mayo
CHRNB2	ExN	0.000975251	-0.187278	Mayo
GON4L	ExN	0.0469712	0.0493235	Mayo
SMG5	ExN	0.0130286	0.174649	Mayo
MRPL24	ExN	0.000279568	-0.190111	Mayo
PIGM	ExN	0.000285576	0.334095	Mayo
TSTD1	ExN	0.000496254	-0.222171	Mayo
KLHDC9	ExN	2.18752e-05	-0.188973	Mayo
TOMM40L	ExN	3.39966e-05	-0.0736072	Mayo
C1orf226	ExN	0.0268975	0.255429	Mayo
MPC2	ExN	1.05436e-06	-0.198258	Mayo
DCAF6	ExN	1.65115e-06	-0.0161947	Mayo
GPR161	ExN	5.22045e-06	0.422193	Mayo
TIPRL	ExN	4.82255e-09	-0.131935	Mayo
SFT2D2	ExN	1.09012e-07	0.539664	Mayo
ATP1B1	ExN	0.00237709	-0.207382	Mayo
KIFAP3	ExN	5.4049e-05	-0.10128	Mayo
PRRC2C	ExN	0.00932005	0.104259	Mayo
KLHL20	ExN	0.000111939	0.297943	Mayo
ZBTB37	ExN	0.000542285	0.329832	Mayo
ABL2	ExN	4.18035e-05	0.210653	Mayo
CEP350	ExN	0.000228062	0.367021	Mayo
NMNAT2	ExN	0.00132656	-0.233155	Mayo
NCF2	ExN	0.0263309	0.403449	Mayo
FAM129A	ExN	0.000114493	0.679985	Mayo
TROVE2	ExN	3.70092e-05	0.415403	Mayo
C1orf53	ExN	0.0151107	-0.1084	Mayo
TMEM9	ExN	4.74053e-06	-0.16358	Mayo
NAV1	ExN	0.00049505	0.207643	Mayo
TIMM17A	ExN	3.01728e-06	-0.0926809	Mayo
MYBPH	ExN	0.000366574	0.244275	Mayo
FMOD	ExN	5.97273e-10	1.48811	Mayo
SNRPE	ExN	0.00272366	-0.137363	Mayo
PIK3C2B	ExN	0.000528668	0.140449	Mayo
NFASC	ExN	0.00354627	0.151744	Mayo
MFSD4	ExN	0.000220954	-0.0384495	Mayo
ELK4	ExN	1.10422e-05	0.320871	Mayo
CAMK1G	ExN	0.0100752	-0.0588126	Mayo
KCTD3	ExN	0.00420088	0.232166	Mayo
C1orf115	ExN	7.77887e-05	-0.157959	Mayo
SUSD4	ExN	1.16709e-06	-0.200321	Mayo
LBR	ExN	0.000101164	0.192773	Mayo
SDE2	ExN	2.5451e-05	0.217025	Mayo
PSEN2	ExN	0.000364428	-0.0383269	Mayo
CDC42BPA	ExN	0.0243521	0.141333	Mayo
ZNF678	ExN	6.1321e-07	0.421824	Mayo
ARF1	ExN	0.000298618	-0.087509	Mayo
MRPL55	ExN	3.53797e-05	-0.374067	Mayo
KCNK1	ExN	0.00107834	-0.0948141	Mayo
IRF2BP2	ExN	0.0116006	0.16622	Mayo
TOMM20	ExN	3.03198e-06	-0.283313	Mayo
LYST	ExN	0.000122242	0.295803	Mayo
HEATR1	ExN	2.93206e-05	0.39581	Mayo
CHRM3	ExN	0.0170274	0.0821001	Mayo
RGS7	ExN	4.07825e-08	-0.309816	Mayo
SMYD3	ExN	8.55166e-05	-0.0876018	Mayo
MYT1L	ExN	0.000208896	-0.163708	Mayo
MBOAT2	ExN	0.0081991	0.141796	Mayo
ITGB1BP1	ExN	0.0217144	-0.134912	Mayo
FAM49A	ExN	5.65108e-07	-0.141068	Mayo
VSNL1	ExN	0.000792175	-0.202006	Mayo
ATAD2B	ExN	0.00101952	0.215135	Mayo
ADCY3	ExN	0.0147647	0.0811452	Mayo
KCNK3	ExN	2.72532e-05	-0.152175	Mayo
CGREF1	ExN	1.13762e-06	-0.340319	Mayo
SLC30A3	ExN	1.91003e-07	-0.492086	Mayo
FNDC4	ExN	4.76226e-05	-0.173221	Mayo
BRE	ExN	0.000632003	-0.149718	Mayo
BIRC6	ExN	0.00624496	0.25161	Mayo
CEBPZOS	ExN	0.00479035	-0.16622	Mayo
MORN2	ExN	0.00143224	-0.109326	Mayo
COX7A2L	ExN	1.96999e-06	-0.246293	Mayo
PREPL	ExN	0.000181264	-0.119053	Mayo
PRKCE	ExN	3.94813e-06	-0.2305	Mayo
FOXN2	ExN	0.00313153	0.309223	Mayo
ERLEC1	ExN	2.31028e-05	-0.169961	Mayo
PSME4	ExN	0.00104394	0.0504067	Mayo
SPTBN1	ExN	0.0132448	0.135502	Mayo
CFAP36	ExN	4.78383e-06	-0.0822314	Mayo
REL	ExN	0.000457633	0.192573	Mayo
COMMD1	ExN	0.000709583	-0.112576	Mayo
TMEM17	ExN	0.00113357	-0.207732	Mayo
MDH1	ExN	0.00182712	-0.147351	Mayo
VPS54	ExN	0.0183823	0.1434	Mayo
SERTAD2	ExN	6.2311e-05	0.22793	Mayo
RAB1A	ExN	7.45609e-05	0.0981105	Mayo
ADD2	ExN	0.00128457	-0.104536	Mayo
BOLA3	ExN	1.57307e-07	-0.204211	Mayo
MTHFD2	ExN	0.0151835	0.379437	Mayo
HK2	ExN	0.00548824	0.232815	Mayo
C2orf68	ExN	0.000172736	0.132347	Mayo
REEP1	ExN	4.88517e-07	-0.282217	Mayo
KDM3A	ExN	2.96796e-05	0.362027	Mayo
AC092835.2	ExN	0.0053522	0.218908	Mayo
CNNM3	ExN	0.00436678	0.183195	Mayo
CREG2	ExN	0.0119277	-0.143272	Mayo
FHL2	ExN	0.00718852	-0.0066347	Mayo
LIMS1	ExN	2.19446e-05	0.503467	Mayo
SEPT10	ExN	9.49803e-05	0.347484	Mayo
SOWAHC	ExN	3.37172e-07	0.510702	Mayo
BCL2L11	ExN	1.09763e-05	0.406122	Mayo
SLC35F5	ExN	5.69476e-05	0.35535	Mayo
TMEM177	ExN	0.00151411	-0.142861	Mayo
MAP3K2	ExN	0.000325277	0.274246	Mayo
AMER3	ExN	0.00179304	-0.0633585	Mayo
NCKAP5	ExN	0.00230116	0.259462	Mayo
MGAT5	ExN	0.00580878	0.14093	Mayo
UBXN4	ExN	2.50009e-05	0.300278	Mayo
SPOPL	ExN	0.00373286	0.205629	Mayo
CACNB4	ExN	6.57938e-05	-0.250145	Mayo
FMNL2	ExN	6.27271e-06	0.371409	Mayo
KCNJ3	ExN	3.50106e-06	-0.330505	Mayo
TANC1	ExN	6.16366e-06	0.471223	Mayo
SCN2A	ExN	1.07529e-05	-0.28745	Mayo
GAD1	ExN	5.06335e-09	-1.03252	Mayo
OLA1	ExN	4.26896e-05	-0.0932187	Mayo
CHN1	ExN	5.48153e-05	-0.092627	Mayo
MTX2	ExN	6.98911e-05	-0.130647	Mayo
TTN	ExN	0.00605271	0.245883	Mayo
UBE2E3	ExN	2.26976e-05	-0.178699	Mayo
SSFA2	ExN	3.04187e-05	0.325617	Mayo
PDE1A	ExN	0.0322624	-0.125104	Mayo
C2orf88	ExN	1.51752e-05	0.383533	Mayo
GLS	ExN	0.00203557	-0.0068691	Mayo
SLC39A10	ExN	0.00015583	-0.065909	Mayo
SF3B1	ExN	0.00207559	0.218441	Mayo
COQ10B	ExN	9.30025e-05	0.00669808	Mayo
MOB4	ExN	1.99396e-05	-0.0300612	Mayo
NBEAL1	ExN	9.14548e-06	0.566279	Mayo
INO80D	ExN	0.00636689	0.221989	Mayo
ADAM23	ExN	1.86439e-05	-0.175917	Mayo
KLF7	ExN	7.17679e-06	0.310249	Mayo
FZD5	ExN	4.542e-05	0.412599	Mayo
PLEKHM3	ExN	0.000113835	0.551386	Mayo
IKZF2	ExN	2.57527e-06	0.64255	Mayo
MARCH4	ExN	5.38588e-07	-0.501101	Mayo
IGFBP5	ExN	4.88422e-06	1.19873	Mayo
TNS1	ExN	2.14873e-05	0.474789	Mayo
USP37	ExN	0.00496758	0.172466	Mayo
ZNF142	ExN	0.000548565	0.188206	Mayo
WNT6	ExN	1.50731e-06	0.466047	Mayo
CDK5R2	ExN	5.5215e-05	-0.343707	Mayo
STK16	ExN	0.00111115	-0.00157348	Mayo
PTPRN	ExN	3.26977e-05	-0.24051	Mayo
EPHA4	ExN	0.000348127	-0.0174083	Mayo
RHBDD1	ExN	5.09848e-07	0.356736	Mayo
SP110	ExN	0.00939246	0.223526	Mayo
EIF4E2	ExN	0.000362632	-0.0162728	Mayo
SH3BP4	ExN	1.91831e-05	0.403092	Mayo
COPS8	ExN	0.000227127	-0.0363823	Mayo
CHL1	ExN	0.0041508	-0.00101491	Mayo
ARL8B	ExN	7.54663e-05	-0.00584775	Mayo
GRM7	ExN	3.1632e-07	-0.195105	Mayo
ARPC4	ExN	1.70052e-05	-0.267205	Mayo
EMC3	ExN	0.00075556	-0.00109018	Mayo
ATP2B2	ExN	2.09407e-05	-0.208376	Mayo
SYN2	ExN	0.020582	-0.183825	Mayo
RAF1	ExN	3.9741e-07	0.238093	Mayo
LSM3	ExN	0.00815637	-0.127176	Mayo
RFTN1	ExN	0.0285423	0.0133885	Mayo
TBC1D5	ExN	5.945e-09	0.362386	Mayo
KAT2B	ExN	1.38998e-05	0.397077	Mayo
UBE2E2	ExN	0.000590607	-0.144028	Mayo
NKIRAS1	ExN	5.63122e-06	-0.113988	Mayo
RPL15	ExN	2.5451e-05	-0.222719	Mayo
SLC4A7	ExN	0.00189198	0.238316	Mayo
OSBPL10	ExN	7.58729e-06	-0.121187	Mayo
FBXL2	ExN	4.26488e-07	-0.179309	Mayo
ARPP21	ExN	1.3719e-05	-0.163498	Mayo
SLC22A13	ExN	0.0191534	0.11967	Mayo
ACVR2B	ExN	0.0102527	0.138703	Mayo
ENTPD3	ExN	1.75494e-07	-0.482047	Mayo
ZNF619	ExN	0.000190887	0.235749	Mayo
ZNF621	ExN	0.000164961	0.278669	Mayo
CCK	ExN	0.000397077	-0.135417	Mayo
VIPR1	ExN	7.82443e-06	-0.191577	Mayo
ABHD5	ExN	9.20801e-07	0.585143	Mayo
ZNF445	ExN	0.00857122	0.10999	Mayo
CDCP1	ExN	0.000182803	0.265355	Mayo
FYCO1	ExN	7.82445e-08	0.619072	Mayo
KIF9	ExN	2.40872e-08	-0.231132	Mayo
SMARCC1	ExN	0.0126804	0.0629761	Mayo
CAMKV	ExN	0.00911795	-0.0191471	Mayo
PBRM1	ExN	4.87387e-05	0.241889	Mayo
CACNA2D3	ExN	0.00209967	-0.0577542	Mayo
ERC2	ExN	0.00910315	-0.129405	Mayo
PXK	ExN	0.00850216	0.124514	Mayo
CADPS	ExN	0.00125202	-0.154462	Mayo
THOC7	ExN	4.57692e-05	-0.1478	Mayo
ATXN7	ExN	0.000689741	0.218402	Mayo
GBE1	ExN	4.48335e-05	0.276473	Mayo
ARL13B	ExN	0.000115084	0.221835	Mayo
CRYBG3	ExN	0.000192502	0.646178	Mayo
LNP1	ExN	0.0001688	-0.264287	Mayo
ALCAM	ExN	0.00053586	0.285288	Mayo
BBX	ExN	1.86766e-07	0.457662	Mayo
TAGLN3	ExN	7.78515e-05	-0.224231	Mayo
CD200	ExN	2.16711e-06	-0.313364	Mayo
SIDT1	ExN	1.35252e-06	-0.491954	Mayo
ZBTB20	ExN	0.000276649	0.426235	Mayo
GAP43	ExN	9.14548e-06	-0.313399	Mayo
LRRC58	ExN	3.11434e-07	0.376998	Mayo
MYLK	ExN	0.000370054	0.375585	Mayo
OSBPL11	ExN	9.32831e-07	0.589974	Mayo
CHCHD6	ExN	1.2494e-05	-0.329794	Mayo
SRPRB	ExN	0.00162224	-0.0767603	Mayo
RAB6B	ExN	0.00202535	0.0161748	Mayo
ANAPC13	ExN	0.00041245	-0.103369	Mayo
PPP2R3A	ExN	0.000706317	0.162535	Mayo
SLC9A9	ExN	6.659e-05	0.43048	Mayo
PLOD2	ExN	4.91377e-07	0.672779	Mayo
PFN2	ExN	5.89738e-08	-0.254464	Mayo
KCNAB1	ExN	5.89708e-06	-0.275034	Mayo
IQCJ-SCHIP1	ExN	2.19918e-06	-0.230074	Mayo
PHC3	ExN	0.000107561	0.311447	Mayo
NCEH1	ExN	0.000515086	0.0535963	Mayo
NDUFB5	ExN	6.1813e-07	-0.211236	Mayo
ATP11B	ExN	0.000173762	0.351574	Mayo
EIF4A2	ExN	0.000123819	-0.0846107	Mayo
P3H2	ExN	0.000738414	0.379819	Mayo
FGF12	ExN	4.74996e-06	-0.341649	Mayo
PAK2	ExN	4.15327e-07	0.280505	Mayo
SPON2	ExN	1.94251e-05	-0.833016	Mayo
SLBP	ExN	2.45823e-05	-0.0358871	Mayo
LRPAP1	ExN	0.000673055	0.00454122	Mayo
S100P	ExN	0.00297091	0.358849	Mayo
LDB2	ExN	0.000160478	-0.0797103	Mayo
DHX15	ExN	5.16017e-05	0.287656	Mayo
KLHL5	ExN	0.00104393	0.172655	Mayo
RFC1	ExN	3.72106e-06	0.275158	Mayo
APBB2	ExN	0.000301129	0.182461	Mayo
UCHL1	ExN	0.000630768	-0.116238	Mayo
LIMCH1	ExN	0.000330029	0.0686182	Mayo
FRYL	ExN	6.89772e-05	0.331938	Mayo
OCIAD1	ExN	7.21255e-06	-0.152243	Mayo
SRD5A3	ExN	0.00670642	-0.248041	Mayo
HOPX	ExN	4.79469e-07	-0.30353	Mayo
REST	ExN	9.60075e-07	0.562512	Mayo
CENPC	ExN	0.00321632	0.228406	Mayo
ANKRD17	ExN	9.49716e-05	0.231556	Mayo
PARM1	ExN	0.00070981	-0.312133	Mayo
PAQR3	ExN	0.000163367	0.286649	Mayo
WDFY3	ExN	2.08038e-06	0.341941	Mayo
AFF1	ExN	3.1317e-09	0.641397	Mayo
SPP1	ExN	0.00377485	0.571282	Mayo
PKD2	ExN	0.00031113	0.253074	Mayo
NAP1L5	ExN	1.23791e-06	-0.407275	Mayo
EIF4E	ExN	9.18536e-07	-0.217867	Mayo
LAMTOR3	ExN	6.7366e-05	0.0169511	Mayo
PPP3CA	ExN	1.63377e-05	-0.104615	Mayo
TET2	ExN	0.000152972	0.206691	Mayo
SGMS2	ExN	0.0162087	0.0719899	Mayo
ALPK1	ExN	0.00121229	0.38396	Mayo
CAMK2D	ExN	0.00143142	-0.129881	Mayo
NDST3	ExN	0.000211704	-0.318924	Mayo
ANXA5	ExN	9.25259e-08	0.5431	Mayo
ELF2	ExN	0.00499016	0.141996	Mayo
NDUFC1	ExN	2.19166e-05	-0.188439	Mayo
RAB33B	ExN	0.00421241	0.129873	Mayo
SETD7	ExN	4.37709e-05	0.330937	Mayo
SCOC	ExN	0.0001142	-0.204866	Mayo
TBC1D9	ExN	3.49054e-06	-0.250967	Mayo
USP38	ExN	1.49295e-06	0.422224	Mayo
GAB1	ExN	9.60579e-06	0.375875	Mayo
ABCE1	ExN	0.00618677	0.0867964	Mayo
MMAA	ExN	0.0134119	0.139269	Mayo
TLR2	ExN	0.0217924	0.483033	Mayo
GUCY1B3	ExN	7.64503e-05	-0.0876575	Mayo
GLRB	ExN	0.003144	-0.0114704	Mayo
MFAP3L	ExN	2.03879e-05	0.433521	Mayo
GALNTL6	ExN	0.000433282	-0.302888	Mayo
GLRA3	ExN	0.000938588	-0.19455	Mayo
IRF2	ExN	9.41397e-07	0.217997	Mayo
ACSL1	ExN	0.000522324	0.262663	Mayo
PDCD6	ExN	5.28742e-06	-0.200827	Mayo
EXOC3	ExN	0.00261321	-0.115937	Mayo
MED10	ExN	0.000460534	-0.163746	Mayo
SRD5A1	ExN	4.38218e-07	-0.176763	Mayo
MTRR	ExN	0.0110217	0.130717	Mayo
SEMA5A	ExN	0.00739444	0.286915	Mayo
BASP1	ExN	0.000572277	-0.093886	Mayo
C5orf22	ExN	0.000120224	-0.158522	Mayo
SUB1	ExN	9.85811e-09	-0.307354	Mayo
RICTOR	ExN	0.00411648	0.194636	Mayo
C5orf51	ExN	0.000203897	0.187787	Mayo
SEPP1	ExN	1.51219e-05	0.860748	Mayo
HCN1	ExN	0.00705811	-0.188897	Mayo
MOCS2	ExN	0.00181309	0.0429805	Mayo
SNX18	ExN	8.65016e-05	0.187055	Mayo
PLK2	ExN	1.24406e-05	-0.150573	Mayo
RAB3C	ExN	0.00175847	-0.373963	Mayo
ZSWIM6	ExN	0.000163111	0.275672	Mayo
ERBB2IP	ExN	1.86642e-06	0.540226	Mayo
CCNB1	ExN	0.000145476	0.0288209	Mayo
ENC1	ExN	0.00721145	-0.0605947	Mayo
POLK	ExN	0.00127781	0.172106	Mayo
TBCA	ExN	0.000123819	-0.181722	Mayo
AP3B1	ExN	0.000523397	0.176963	Mayo
SERINC5	ExN	0.000454828	0.33144	Mayo
COX7C	ExN	0.000231276	-0.129086	Mayo
MEF2C	ExN	0.00075769	-0.0991286	Mayo
ERAP1	ExN	0.0007686	0.357266	Mayo
CHD1	ExN	0.000527183	0.2418	Mayo
FAM174A	ExN	7.63913e-06	-0.218802	Mayo
MAN2A1	ExN	0.00271863	0.27242	Mayo
REEP5	ExN	9.08858e-05	-0.082464	Mayo
TRIM36	ExN	0.00170982	-0.274114	Mayo
FEM1C	ExN	2.03572e-05	0.334817	Mayo
TMED7	ExN	6.82575e-05	0.357484	Mayo
HSD17B4	ExN	0.000117477	0.208304	Mayo
ZNF608	ExN	0.00422688	0.13241	Mayo
MARCH3	ExN	3.49813e-05	0.463204	Mayo
PRRC1	ExN	1.00719e-05	0.305494	Mayo
SLC12A2	ExN	0.00493754	0.284014	Mayo
HINT1	ExN	5.40357e-06	-0.200869	Mayo
CDC42SE2	ExN	0.000134798	-0.104796	Mayo
UQCRQ	ExN	1.99487e-07	-0.208963	Mayo
AFF4	ExN	2.01323e-07	0.355946	Mayo
VDAC1	ExN	7.7244e-05	-0.0987414	Mayo
PPP2CA	ExN	9.69568e-06	-0.0771951	Mayo
SEC24A	ExN	7.14135e-06	0.409483	Mayo
KDM3B	ExN	4.61892e-07	0.282681	Mayo
CTNNA1	ExN	9.18536e-07	0.3302	Mayo
PURA	ExN	0.0336665	0.290756	Mayo
ANKHD1	ExN	0.000930358	0.24313	Mayo
ANKHD1-EIF4EBP3	ExN	0.00123322	0.186383	Mayo
NDUFA2	ExN	7.66653e-07	-0.321569	Mayo
PCDHB13	ExN	0.000136357	0.301908	Mayo
PCDHB15	ExN	1.54494e-05	0.442587	Mayo
RNF14	ExN	0.0173194	-0.0934936	Mayo
NDFIP1	ExN	9.14548e-06	-0.164774	Mayo
PPP2R2B	ExN	0.0110201	-0.0267178	Mayo
STK32A	ExN	0.000660187	0.354283	Mayo
NDST1	ExN	0.00105858	0.134806	Mayo
ANXA6	ExN	2.79137e-05	-0.0904529	Mayo
GALNT10	ExN	7.64604e-06	0.329771	Mayo
FNDC9	ExN	0.00128442	0.132151	Mayo
LSM11	ExN	5.15815e-05	-0.0930609	Mayo
ADRA1B	ExN	0.007182	0.0358145	Mayo
GABRB2	ExN	0.00228122	-0.202698	Mayo
GABRA1	ExN	2.05476e-05	-0.446359	Mayo
GABRG2	ExN	0.0225874	-0.185108	Mayo
MAT2B	ExN	0.000250439	-0.00740101	Mayo
STK10	ExN	0.00810714	0.218955	Mayo
RPL26L1	ExN	0.00022005	-0.0832008	Mayo
STC2	ExN	0.0470394	0.0427714	Mayo
HMP19	ExN	1.86929e-06	-0.405588	Mayo
NOP16	ExN	5.64995e-05	-0.0583039	Mayo
NSD1	ExN	0.000437089	0.269735	Mayo
PRELID1	ExN	7.50811e-05	-0.0866507	Mayo
TMED9	ExN	0.00949474	-0.0129109	Mayo
TBC1D9B	ExN	0.000828346	0.134099	Mayo
RNF130	ExN	0.020504	0.11571	Mayo
MAPK9	ExN	4.94897e-06	-0.125238	Mayo
SERPINB9	ExN	0.0250858	0.10056	Mayo
TUBB2A	ExN	0.000488746	-0.262959	Mayo
SLC22A23	ExN	0.000531372	0.15688	Mayo
LYRM4	ExN	0.000464735	-0.113927	Mayo
NRN1	ExN	1.58348e-08	-0.536989	Mayo
CD83	ExN	0.000285888	-0.0854997	Mayo
CAP2	ExN	4.48998e-05	-0.22445	Mayo
E2F3	ExN	7.4881e-05	0.00634065	Mayo
NRSN1	ExN	5.3403e-07	-0.400101	Mayo
ZKSCAN8	ExN	0.000162531	0.325504	Mayo
MDC1	ExN	0.028837	0.00456023	Mayo
DDR1	ExN	6.51015e-07	0.61946	Mayo
PACSIN1	ExN	0.000143814	-0.198173	Mayo
CPNE5	ExN	0.00113697	-0.185577	Mayo
MTCH1	ExN	0.00173015	-0.0935759	Mayo
LRFN2	ExN	0.000103608	-0.150325	Mayo
NFYA	ExN	0.000294925	0.246958	Mayo
MRPS10	ExN	7.05144e-05	-0.0370235	Mayo
UBR2	ExN	0.00528986	0.184167	Mayo
MEA1	ExN	5.52247e-05	-0.123855	Mayo
DLK2	ExN	8.30465e-05	-0.417068	Mayo
LRRC73	ExN	5.30143e-08	-0.386275	Mayo
ENPP4	ExN	0.00174115	0.222508	Mayo
TMEM14A	ExN	0.00398015	-0.0484308	Mayo
GSTA2	ExN	4.55802e-06	-0.00488033	Mayo
GSTA4	ExN	1.40618e-06	-0.356459	Mayo
LRRC1	ExN	1.38114e-06	0.48721	Mayo
DST	ExN	0.00596003	0.219313	Mayo
SDHAF4	ExN	8.5286e-07	-0.445121	Mayo
COX7A2	ExN	8.92281e-06	-0.225245	Mayo
MYO6	ExN	0.000852003	0.219784	Mayo
PHIP	ExN	0.00990205	0.146936	Mayo
SNAP91	ExN	0.000171897	-0.133095	Mayo
CNR1	ExN	0.0245992	-0.239093	Mayo
PNRC1	ExN	6.38947e-07	0.450997	Mayo
BVES	ExN	7.25202e-05	0.503859	Mayo
ATG5	ExN	0.000149586	0.0200838	Mayo
CD164	ExN	0.000195391	0.328156	Mayo
WASF1	ExN	0.00266461	-0.0488708	Mayo
TSPYL4	ExN	2.90519e-10	-0.198486	Mayo
TSPYL1	ExN	1.54804e-08	-0.172978	Mayo
RNF217	ExN	0.00088832	0.243143	Mayo
IFNGR1	ExN	0.00479035	0.229304	Mayo
PPIL4	ExN	0.00145823	0.107709	Mayo
PCMT1	ExN	0.000613257	-0.0863192	Mayo
LRP11	ExN	0.00829814	-0.0216901	Mayo
RMND1	ExN	4.00198e-05	-0.145577	Mayo
IPCEF1	ExN	0.000259431	-0.28529	Mayo
ARID1B	ExN	0.00141747	0.162306	Mayo
SNX9	ExN	0.000139803	0.123085	Mayo
TAGAP	ExN	0.027672	-0.0213229	Mayo
IGF2R	ExN	1.70667e-05	0.482785	Mayo
PARK2	ExN	0.000114493	0.00272808	Mayo
QKI	ExN	3.51948e-05	0.442384	Mayo
RPS6KA2	ExN	0.0342551	0.0700659	Mayo
MLLT4	ExN	0.000914178	0.167216	Mayo
PHF10	ExN	0.0142004	0.110952	Mayo
PRKAR1B	ExN	0.000185262	-0.234939	Mayo
DNAAF5	ExN	1.76301e-05	0.260984	Mayo
C7orf50	ExN	8.7985e-07	-0.455679	Mayo
AMZ1	ExN	0.0330626	0.126837	Mayo
ICA1	ExN	5.4669e-06	-0.378095	Mayo
DGKB	ExN	0.000687719	-0.186557	Mayo
TSPAN13	ExN	0.0105906	0.0201027	Mayo
SNX10	ExN	0.000990941	-0.169918	Mayo
JAZF1	ExN	0.000263873	-0.164443	Mayo
CPVL	ExN	0.0131251	0.255331	Mayo
ZNRF2	ExN	5.66572e-05	0.332099	Mayo
GARS	ExN	6.31805e-06	-0.00856757	Mayo
PDE1C	ExN	0.000330021	0.351036	Mayo
HECW1	ExN	0.00261321	-0.154519	Mayo
PPIA	ExN	0.000124012	-0.174123	Mayo
LANCL2	ExN	0.00107136	-0.100024	Mayo
CHCHD2	ExN	7.61901e-06	-0.204688	Mayo
WBSCR17	ExN	4.57868e-08	-0.341439	Mayo
STX1A	ExN	1.51773e-05	-0.347615	Mayo
CLIP2	ExN	0.0119246	0.205025	Mayo
HIP1	ExN	2.54401e-05	0.410658	Mayo
YWHAG	ExN	2.35784e-05	-0.175873	Mayo
CACNA2D1	ExN	1.97285e-06	-0.228227	Mayo
PCLO	ExN	0.0117923	-0.110677	Mayo
CROT	ExN	0.000250439	0.0188729	Mayo
STEAP2	ExN	0.000296165	0.0300494	Mayo
CDK14	ExN	4.36727e-05	-0.148682	Mayo
ANKIB1	ExN	1.54494e-05	0.214461	Mayo
ASNS	ExN	3.22864e-06	-0.120204	Mayo
BAIAP2L1	ExN	9.80618e-06	0.295945	Mayo
TMEM130	ExN	0.000694589	-0.168007	Mayo
TRRAP	ExN	0.000544318	0.29161	Mayo
SMURF1	ExN	0.000948946	0.0368972	Mayo
ARPC1A	ExN	0.000710441	-0.0256429	Mayo
ATP5J2	ExN	7.1874e-07	-0.169144	Mayo
COPS6	ExN	0.000126093	-0.113814	Mayo
LAMTOR4	ExN	1.86642e-06	-0.378511	Mayo
C7orf43	ExN	4.4325e-05	-0.142049	Mayo
STAG3	ExN	0.00661242	-0.159783	Mayo
TRIM56	ExN	0.000280342	0.489198	Mayo
AP1S1	ExN	5.35156e-06	-0.373193	Mayo
VGF	ExN	2.03025e-10	-1.46191	Mayo
COL26A1	ExN	7.29197e-07	-0.293909	Mayo
HBP1	ExN	9.26804e-06	0.276244	Mayo
CTTNBP2	ExN	0.00180696	0.0516167	Mayo
FAM3C	ExN	8.18861e-08	-0.228845	Mayo
AASS	ExN	0.000579189	0.514594	Mayo
NDUFA5	ExN	1.9776e-07	-0.261002	Mayo
WASL	ExN	7.88453e-05	-0.0105105	Mayo
ZNF800	ExN	7.56361e-06	0.347072	Mayo
ARF5	ExN	1.60655e-05	-0.330049	Mayo
HILPDA	ExN	0.0187831	0.571875	Mayo
UBE2H	ExN	0.000138144	0.170754	Mayo
CHCHD3	ExN	0.00414187	0.0662027	Mayo
NUP205	ExN	6.96963e-07	0.398237	Mayo
MTPN	ExN	2.02861e-05	-0.00803025	Mayo
CREB3L2	ExN	2.0816e-05	0.529354	Mayo
MKRN1	ExN	0.000461689	0.0123843	Mayo
DENND2A	ExN	0.0118765	0.182294	Mayo
NDUFB2	ExN	0.000246097	-0.135502	Mayo
MRPS33	ExN	5.60811e-05	-0.162405	Mayo
SSBP1	ExN	0.0155703	-0.0935331	Mayo
CNTNAP2	ExN	0.00827186	-0.0759308	Mayo
ATP6V0E2	ExN	3.61266e-06	-0.413301	Mayo
SLC4A2	ExN	6.35441e-06	0.330406	Mayo
GALNT11	ExN	2.83754e-06	-0.0758744	Mayo
KMT2C	ExN	0.000370874	0.302255	Mayo
ACTR3B	ExN	2.97752e-06	-0.154318	Mayo
DPP6	ExN	1.58609e-09	-0.433777	Mayo
PRKX	ExN	0.000240004	0.656207	Mayo
STS	ExN	1.01055e-05	-0.194152	Mayo
WWC3	ExN	0.016544	0.193378	Mayo
PIGA	ExN	0.0124225	0.268703	Mayo
REPS2	ExN	0.00347478	-0.170475	Mayo
CNKSR2	ExN	0.007589	0.0694217	Mayo
DYNLT3	ExN	0.000211421	-0.116241	Mayo
TSPAN7	ExN	1.30098e-05	-0.139747	Mayo
BCOR	ExN	0.00358002	0.133894	Mayo
ATP6AP2	ExN	0.000177987	-0.0173314	Mayo
KDM6A	ExN	9.45336e-06	0.452583	Mayo
USP11	ExN	0.000156406	-0.171642	Mayo
SYN1	ExN	0.00216158	-0.133862	Mayo
PORCN	ExN	7.19642e-06	-0.133425	Mayo
GRIPAP1	ExN	1.04089e-09	-0.352827	Mayo
SYP	ExN	1.52904e-05	-0.28322	Mayo
SHROOM4	ExN	2.15447e-05	0.533327	Mayo
NUDT11	ExN	0.00152174	-0.0682771	Mayo
SMC1A	ExN	3.52787e-06	0.387496	Mayo
HUWE1	ExN	0.000930331	0.220007	Mayo
PHF8	ExN	0.0154526	0.182166	Mayo
FAM120C	ExN	1.16367e-05	0.235325	Mayo
UBQLN2	ExN	0.00880241	-0.0306745	Mayo
ZXDA	ExN	0.000385736	0.346229	Mayo
ARHGEF9	ExN	5.30426e-05	-0.0539545	Mayo
DLG3	ExN	3.84618e-09	-0.198051	Mayo
NAP1L2	ExN	0.000203522	-0.180004	Mayo
MAGEE1	ExN	0.0266555	-0.000273818	Mayo
BRWD3	ExN	0.000516562	0.250682	Mayo
RPS6KA6	ExN	2.76876e-06	-0.217391	Mayo
NAP1L3	ExN	0.00173148	-0.110464	Mayo
FAM133A	ExN	7.8373e-06	-0.195529	Mayo
PCDH19	ExN	0.000153256	-0.137472	Mayo
GPRASP1	ExN	5.89688e-06	-0.375003	Mayo
GPRASP2	ExN	2.05782e-05	-0.245758	Mayo
BEX1	ExN	1.50628e-06	-0.387321	Mayo
BEX2	ExN	1.17403e-06	-0.36065	Mayo
TCEAL7	ExN	8.73414e-09	-0.369205	Mayo
NGFRAP1	ExN	3.26208e-08	-0.380212	Mayo
MORF4L2	ExN	5.25886e-05	-0.0813019	Mayo
FRMPD3	ExN	0.00773541	0.302143	Mayo
PAK3	ExN	6.03936e-05	-0.187754	Mayo
ZCCHC12	ExN	0.00425662	-0.392685	Mayo
PGRMC1	ExN	0.00376024	-0.0968155	Mayo
NDUFA1	ExN	1.27018e-05	-0.191673	Mayo
TMEM255A	ExN	0.000151761	0.324203	Mayo
LAMP2	ExN	6.54397e-06	0.656699	Mayo
MCTS1	ExN	7.4717e-06	-0.198565	Mayo
HPRT1	ExN	6.30574e-07	-0.307416	Mayo
FAM122B	ExN	0.000107992	-0.132159	Mayo
SMIM10L2B	ExN	4.37906e-06	-0.360234	Mayo
SMIM10L2A	ExN	1.9523e-07	-0.452129	Mayo
SLC9A6	ExN	2.73174e-05	-0.0499785	Mayo
FGF13	ExN	2.90025e-05	-0.189413	Mayo
SLITRK4	ExN	7.56361e-06	-0.307561	Mayo
GABRA3	ExN	0.0254284	-0.0628479	Mayo
PNMA3	ExN	8.02925e-07	-0.399997	Mayo
ZNF275	ExN	1.8161e-06	0.238851	Mayo
ZFP92	ExN	0.0443635	0.097148	Mayo
ATP2B3	ExN	0.00454944	-0.0978929	Mayo
BCAP31	ExN	1.62361e-05	-0.136899	Mayo
L1CAM	ExN	0.0376742	0.0320939	Mayo
MECP2	ExN	0.000152241	0.24395	Mayo
LAGE3	ExN	1.30098e-05	-0.224466	Mayo
F8	ExN	0.00791208	0.109004	Mayo
CLN8	ExN	2.08214e-06	0.137617	Mayo
ERI1	ExN	0.0237193	0.134478	Mayo
TNKS	ExN	0.000511543	0.177007	Mayo
DLC1	ExN	9.4598e-07	0.477463	Mayo
TUSC3	ExN	9.44871e-05	-0.0733573	Mayo
MICU3	ExN	0.00567156	-0.164352	Mayo
MTUS1	ExN	0.00177956	0.30634	Mayo
SH2D4A	ExN	1.69632e-06	0.467737	Mayo
ATP6V1B2	ExN	3.8433e-08	-0.248856	Mayo
GFRA2	ExN	0.000178064	-0.244199	Mayo
PHYHIP	ExN	0.000755426	-0.217987	Mayo
C8orf58	ExN	0.000123231	0.253754	Mayo
EGR3	ExN	0.0018986	-0.0232744	Mayo
LOXL2	ExN	0.000564676	0.297233	Mayo
PNMA2	ExN	0.00112884	-0.0887714	Mayo
PTK2B	ExN	2.25168e-05	-0.229417	Mayo
ZNF395	ExN	8.60985e-07	0.368349	Mayo
HMBOX1	ExN	6.11275e-07	0.529696	Mayo
KIF13B	ExN	0.000130426	0.226013	Mayo
SARAF	ExN	0.000321943	-0.0623977	Mayo
BAG4	ExN	2.45814e-05	-0.0753099	Mayo
TM2D2	ExN	3.20396e-05	-0.012644	Mayo
KAT6A	ExN	2.90519e-10	0.440853	Mayo
VDAC3	ExN	1.51871e-06	-0.0670636	Mayo
HOOK3	ExN	0.00286815	0.122194	Mayo
UBE2V2	ExN	8.06591e-09	-0.237837	Mayo
ATP6V1H	ExN	0.00022933	-0.0211382	Mayo
RAB2A	ExN	1.99396e-05	-0.0907262	Mayo
CHD7	ExN	0.0338861	0.164865	Mayo
C8orf46	ExN	0.0346582	-0.0303602	Mayo
MYBL1	ExN	8.76851e-05	0.345028	Mayo
MSC	ExN	0.00631365	-0.307949	Mayo
STAU2	ExN	0.000413959	-0.0548059	Mayo
TCEB1	ExN	4.05906e-08	-0.13068	Mayo
TMEM70	ExN	0.000252035	0.0526498	Mayo
GDAP1	ExN	9.78252e-06	-0.325931	Mayo
STMN2	ExN	0.000175609	-0.29589	Mayo
TPD52	ExN	4.66407e-07	-0.214361	Mayo
ZBTB10	ExN	9.8851e-08	0.340023	Mayo
ZNF704	ExN	6.1321e-07	0.339815	Mayo
PAG1	ExN	0.00384012	0.238429	Mayo
RALYL	ExN	1.12179e-05	-0.13843	Mayo
CALB1	ExN	4.27574e-07	-0.741386	Mayo
RBM12B	ExN	0.00283722	0.230481	Mayo
PDP1	ExN	0.00174275	-0.0412931	Mayo
KIAA1429	ExN	0.0114409	0.118376	Mayo
DPY19L4	ExN	4.64424e-06	0.290954	Mayo
TP53INP1	ExN	0.00606746	0.257399	Mayo
CPQ	ExN	2.67912e-11	0.730688	Mayo
TSPYL5	ExN	0.000121515	-0.134939	Mayo
STK3	ExN	4.14679e-05	0.416145	Mayo
COX6C	ExN	3.21406e-07	-0.269656	Mayo
ANKRD46	ExN	1.7802e-05	-0.0475345	Mayo
YWHAZ	ExN	3.58893e-05	-0.180921	Mayo
KCNV1	ExN	0.00268106	-0.186265	Mayo
MAL2	ExN	6.61059e-07	-0.314413	Mayo
ZHX2	ExN	2.19166e-05	0.18838	Mayo
MTSS1	ExN	0.00531809	-0.0138504	Mayo
SLA	ExN	0.00695825	0.461794	Mayo
AGO2	ExN	2.56113e-06	0.557723	Mayo
LY6E	ExN	0.000527726	-0.176816	Mayo
TSTA3	ExN	0.000793961	-0.166555	Mayo
GRINA	ExN	0.000953065	0.0046386	Mayo
JAK2	ExN	3.9182e-06	0.394698	Mayo
ERMP1	ExN	0.000162521	0.228058	Mayo
TMEM261	ExN	8.82339e-06	-0.288279	Mayo
MPDZ	ExN	0.0047563	0.179041	Mayo
RRAGA	ExN	0.000388872	0.0556611	Mayo
HAUS6	ExN	0.00325223	0.218124	Mayo
KLHL9	ExN	0.00212349	0.164535	Mayo
ELAVL2	ExN	0.00720974	-0.121595	Mayo
MOB3B	ExN	5.73454e-06	0.376078	Mayo
NDUFB6	ExN	0.000401074	-0.113101	Mayo
RPP25L	ExN	0.00349587	-0.0977842	Mayo
DCTN3	ExN	0.000110263	-0.0841924	Mayo
PHF24	ExN	0.0034949	-0.0710782	Mayo
STOML2	ExN	0.000383559	0.0164612	Mayo
CLTA	ExN	5.33735e-07	-0.277686	Mayo
ZBTB5	ExN	6.34839e-06	0.369886	Mayo
PIP5K1B	ExN	1.23104e-05	-0.268747	Mayo
SMC5	ExN	0.000675295	0.220505	Mayo
GDA	ExN	0.00177471	-0.273535	Mayo
RFK	ExN	4.10813e-07	-0.0780387	Mayo
TLE4	ExN	0.0109396	0.212513	Mayo
KIF27	ExN	0.00138591	0.237611	Mayo
ISCA1	ExN	6.17113e-05	-0.0401456	Mayo
ZCCHC6	ExN	0.000139257	0.251791	Mayo
SPIN1	ExN	1.18272e-06	-0.0432744	Mayo
PHF2	ExN	0.0011233	0.166778	Mayo
NANS	ExN	0.000681679	-0.0243821	Mayo
GABBR2	ExN	1.09474e-05	-0.183894	Mayo
TGFBR1	ExN	0.00609447	0.202412	Mayo
STX17	ExN	0.0101909	0.138302	Mayo
INVS	ExN	0.00091555	0.276838	Mayo
TMEM246	ExN	0.00177564	-0.0652755	Mayo
TXN	ExN	0.000168064	-0.14713	Mayo
ZNF483	ExN	0.00725394	0.273663	Mayo
KIAA1958	ExN	8.34409e-07	0.578189	Mayo
FKBP15	ExN	0.000375618	0.056057	Mayo
AKNA	ExN	0.0331953	0.0814125	Mayo
CDK5RAP2	ExN	0.00368783	0.127435	Mayo
PHF19	ExN	0.000109499	0.206059	Mayo
PTGS1	ExN	0.036756	-0.0598259	Mayo
PDCL	ExN	3.41785e-05	0.242704	Mayo
PSMB7	ExN	0.000240004	-0.11715	Mayo
ARPC5L	ExN	6.69236e-07	-0.239815	Mayo
SCAI	ExN	2.63949e-05	-0.207046	Mayo
RABEPK	ExN	0.000115137	-0.18148	Mayo
GAPVD1	ExN	2.71618e-05	0.19036	Mayo
LRSAM1	ExN	0.000312199	-0.186285	Mayo
STXBP1	ExN	9.37561e-05	-0.150909	Mayo
PTRH1	ExN	0.000190981	-0.200476	Mayo
DNM1	ExN	0.000512035	-0.147707	Mayo
TRUB2	ExN	0.000819599	-0.16555	Mayo
SLC27A4	ExN	0.000248624	-0.204025	Mayo
TOR1A	ExN	0.000435716	0.0435882	Mayo
ABL1	ExN	2.00127e-06	0.192511	Mayo
NUP214	ExN	0.0251071	0.0676047	Mayo
SETX	ExN	6.84142e-05	0.246603	Mayo
RALGDS	ExN	0.0196023	0.19561	Mayo
FAM163B	ExN	0.00131866	-0.123898	Mayo
VAV2	ExN	0.0111183	0.108937	Mayo
OLFM1	ExN	1.59913e-08	-0.241917	Mayo
TMEM203	ExN	0.00139134	-0.0786323	Mayo
NUP98	ExN	3.03695e-07	0.290787	Mayo
TRIM22	ExN	0.000233593	0.49663	Mayo
NRIP3	ExN	6.79522e-07	-0.453395	Mayo
DENND5A	ExN	9.68874e-05	0.182152	Mayo
MICAL2	ExN	0.00307281	-0.0606476	Mayo
BTBD10	ExN	1.7463e-06	-0.0595597	Mayo
PSMA1	ExN	1.0047e-05	-0.0206032	Mayo
HPS5	ExN	9.32754e-05	0.222036	Mayo
SVIP	ExN	9.05618e-05	-0.147934	Mayo
CCDC34	ExN	4.03052e-06	-0.129986	Mayo
BDNF	ExN	0.000178881	-0.456564	Mayo
MPPED2	ExN	2.11624e-06	-0.0920405	Mayo
HIPK3	ExN	7.42396e-08	0.444285	Mayo
KIAA1549L	ExN	0.00184888	-0.0767994	Mayo
FJX1	ExN	0.00203557	-0.00169199	Mayo
COMMD9	ExN	8.65016e-05	-0.0310653	Mayo
TRAF6	ExN	7.30534e-05	0.358072	Mayo
TTC17	ExN	0.0342468	0.126304	Mayo
ALX4	ExN	7.06742e-06	0.596513	Mayo
SYT13	ExN	2.90694e-06	-0.278206	Mayo
PHF21A	ExN	0.0156438	0.101498	Mayo
PSMC3	ExN	0.000343014	-0.169223	Mayo
C1QTNF4	ExN	3.15329e-05	-0.378379	Mayo
NUP160	ExN	4.61762e-06	0.321209	Mayo
MED19	ExN	0.000481342	-0.0791993	Mayo
PATL1	ExN	5.1647e-07	0.260886	Mayo
LBHD1	ExN	0.000382743	-0.235321	Mayo
TTC9C	ExN	7.49762e-05	-0.0987634	Mayo
CHRM1	ExN	0.000237029	-0.171305	Mayo
ATL3	ExN	1.29957e-06	0.385792	Mayo
RTN3	ExN	0.00177956	-0.115001	Mayo
COX8A	ExN	6.14208e-06	-0.254247	Mayo
B4GAT1	ExN	0.000889311	-0.0895863	Mayo
SYT12	ExN	3.41807e-05	-0.292001	Mayo
NDUFV1	ExN	1.34266e-05	-0.272521	Mayo
NDUFS8	ExN	5.62266e-05	-0.213485	Mayo
MRPL21	ExN	0.000791699	-0.288698	Mayo
PPFIA1	ExN	6.62439e-06	0.285531	Mayo
IL18BP	ExN	0.0227815	0.141011	Mayo
ARAP1	ExN	0.0185012	0.182299	Mayo
FCHSD2	ExN	5.69315e-06	0.293898	Mayo
PGM2L1	ExN	0.00682087	-0.185643	Mayo
RNF169	ExN	3.21763e-05	0.354596	Mayo
PAK1	ExN	0.00205551	-0.295885	Mayo
NDUFC2	ExN	2.28539e-05	-0.235859	Mayo
ANKRD42	ExN	4.42575e-08	-0.100759	Mayo
CREBZF	ExN	0.0242461	0.184391	Mayo
PICALM	ExN	0.000294119	0.162113	Mayo
CTSC	ExN	0.00370168	0.344521	Mayo
ENDOD1	ExN	0.000858281	0.318142	Mayo
GRIA4	ExN	5.02222e-08	-0.295282	Mayo
AASDHPPT	ExN	0.0100798	-0.00350042	Mayo
ELMOD1	ExN	1.22545e-05	-0.19279	Mayo
ATM	ExN	0.0142404	0.221992	Mayo
DDX10	ExN	5.05535e-07	-0.0763165	Mayo
C11orf87	ExN	0.000110793	-0.285507	Mayo
RDX	ExN	2.98937e-06	0.338077	Mayo
ZBTB16	ExN	2.05073e-06	0.667293	Mayo
DSCAML1	ExN	0.0026853	0.00663735	Mayo
FXYD6	ExN	0.0164521	-0.189979	Mayo
SCN2B	ExN	0.000132608	-0.310602	Mayo
ATP5L	ExN	2.94808e-06	-0.2172	Mayo
KMT2A	ExN	0.00693255	0.149169	Mayo
THY1	ExN	0.0047209	-0.160769	Mayo
SCN3B	ExN	0.0248279	-0.0789863	Mayo
DDX25	ExN	8.5588e-05	-0.0798757	Mayo
SNX19	ExN	3.27149e-05	0.272794	Mayo
OPCML	ExN	0.000523787	-0.156107	Mayo
THYN1	ExN	1.36713e-05	-0.165326	Mayo
DIP2C	ExN	0.00158472	0.0901116	Mayo
PFKFB3	ExN	6.5148e-06	0.592091	Mayo
SFMBT2	ExN	0.00226312	0.191741	Mayo
CAMK1D	ExN	0.000215387	-0.0268497	Mayo
PTER	ExN	0.0360797	-0.0375936	Mayo
CACNB2	ExN	2.09971e-06	-0.0701301	Mayo
PLXDC2	ExN	0.000157843	0.432149	Mayo
ARHGAP21	ExN	0.0018825	0.135274	Mayo
GPR158	ExN	0.000163648	-0.402229	Mayo
GAD2	ExN	2.06278e-06	-1.07989	Mayo
CSGALNACT2	ExN	0.039046	0.0629043	Mayo
MARCH8	ExN	1.01055e-05	0.340152	Mayo
ZFAND4	ExN	0.000672914	0.204046	Mayo
C10orf128	ExN	0.00756123	-0.121127	Mayo
CISD1	ExN	1.30976e-08	-0.196068	Mayo
ARID5B	ExN	0.00948255	0.26655	Mayo
ZNF365	ExN	0.0180352	-0.182354	Mayo
SLC25A16	ExN	0.000518348	-0.193585	Mayo
DDX21	ExN	4.12082e-06	0.4793	Mayo
SGPL1	ExN	1.49824e-06	0.225997	Mayo
UNC5B	ExN	0.000138303	0.428015	Mayo
CHST3	ExN	3.3401e-05	0.68492	Mayo
ASCC1	ExN	9.19712e-05	0.21295	Mayo
P4HA1	ExN	0.00725431	0.30696	Mayo
PPP3CB	ExN	9.91344e-06	-0.149657	Mayo
USP54	ExN	1.97806e-06	0.491419	Mayo
CHCHD1	ExN	0.00139418	-0.129649	Mayo
SAMD8	ExN	2.91297e-05	0.174991	Mayo
DLG5	ExN	4.81794e-07	0.556119	Mayo
ZMIZ1	ExN	1.5767e-06	0.249318	Mayo
ZCCHC24	ExN	0.000845179	0.159499	Mayo
GHITM	ExN	1.81298e-05	-0.00321991	Mayo
GRID1	ExN	0.00557555	0.146446	Mayo
LIPA	ExN	0.000781112	0.305519	Mayo
BTAF1	ExN	0.00353212	0.232745	Mayo
RBP4	ExN	0.00700957	-0.1436	Mayo
TBC1D12	ExN	0.000148627	0.0904307	Mayo
LCOR	ExN	0.00529254	0.245209	Mayo
C10orf12	ExN	1.18085e-05	0.485499	Mayo
EXOSC1	ExN	8.72703e-06	-0.232213	Mayo
BLOC1S2	ExN	5.09848e-07	-0.184692	Mayo
SLF2	ExN	0.00445259	0.0416876	Mayo
DPCD	ExN	2.56219e-06	-0.237148	Mayo
PPRC1	ExN	0.0421294	0.0870445	Mayo
ACTR1A	ExN	0.0133547	-0.0564731	Mayo
WBP1L	ExN	2.96169e-14	0.379217	Mayo
INA	ExN	0.000241439	-0.20234	Mayo
PDCD11	ExN	0.0191534	0.0890449	Mayo
SH3PXD2A	ExN	0.000243701	-0.278617	Mayo
MXI1	ExN	2.77177e-06	0.291235	Mayo
VTI1A	ExN	0.000155418	0.249977	Mayo
NHLRC2	ExN	4.74053e-06	0.283455	Mayo
HSPA12A	ExN	0.000664469	-0.0463569	Mayo
PDZD8	ExN	3.16688e-05	0.392308	Mayo
INPP5F	ExN	1.69983e-05	-0.193045	Mayo
MCMBP	ExN	2.26587e-08	0.336083	Mayo
PLPP4	ExN	0.00879475	0.0645484	Mayo
IKZF5	ExN	0.00245103	0.153791	Mayo
DOCK1	ExN	0.000128097	0.380516	Mayo
STK32C	ExN	6.01846e-06	-0.230668	Mayo
CALY	ExN	4.01316e-06	-0.445429	Mayo
SYCE1	ExN	5.38313e-05	-0.540807	Mayo
KDM5A	ExN	6.27357e-08	0.431905	Mayo
WNK1	ExN	1.03244e-05	0.00158082	Mayo
ERC1	ExN	1.30606e-05	0.218203	Mayo
LRTM2	ExN	7.64936e-07	-0.367505	Mayo
NCAPD2	ExN	4.12082e-06	0.335366	Mayo
CHD4	ExN	1.05944e-06	0.207825	Mayo
ENO2	ExN	1.42092e-06	-0.43624	Mayo
ATN1	ExN	1.8763e-05	0.243559	Mayo
CLSTN3	ExN	4.66407e-07	-0.285828	Mayo
NECAP1	ExN	5.53194e-06	-0.175649	Mayo
GABARAPL1	ExN	1.70697e-06	-0.148945	Mayo
ETV6	ExN	0.00556801	0.238162	Mayo
LRP6	ExN	4.12114e-06	0.326314	Mayo
FAM234B	ExN	0.000268461	-0.0715622	Mayo
ATF7IP	ExN	1.12269e-05	0.231153	Mayo
CMAS	ExN	5.59794e-06	-0.214714	Mayo
MRPS35	ExN	0.000105394	-0.0808483	Mayo
SLC2A13	ExN	0.000144823	-0.0914094	Mayo
PRICKLE1	ExN	3.99947e-05	-0.044477	Mayo
PUS7L	ExN	0.0311088	0.18505	Mayo
IRAK4	ExN	9.78938e-05	0.291028	Mayo
ARID2	ExN	8.45713e-07	0.307929	Mayo
SCAF11	ExN	0.00126591	0.195385	Mayo
ARF3	ExN	9.64225e-05	-0.0822355	Mayo
KMT2D	ExN	0.0127816	0.126356	Mayo
COX14	ExN	5.09382e-05	-0.173928	Mayo
DIP2B	ExN	0.000128345	0.272022	Mayo
SCN8A	ExN	4.9019e-05	-0.232174	Mayo
GRASP	ExN	0.00151431	-0.202067	Mayo
SP1	ExN	1.93026e-09	0.520156	Mayo
ATF7	ExN	3.35311e-06	0.425358	Mayo
SMUG1	ExN	0.00226794	-0.0891452	Mayo
ZC3H10	ExN	0.000227448	0.168564	Mayo
CNPY2	ExN	2.04235e-06	-0.226315	Mayo
GLS2	ExN	0.000190267	-0.137173	Mayo
BAZ2A	ExN	0.00339834	0.152883	Mayo
CTDSP2	ExN	1.62122e-07	0.485377	Mayo
MON2	ExN	0.0249439	0.0857196	Mayo
PPM1H	ExN	8.74109e-07	-0.187008	Mayo
DYRK2	ExN	0.00158057	0.155276	Mayo
RAP1B	ExN	3.81427e-06	0.34973	Mayo
FRS2	ExN	0.000188877	0.285754	Mayo
CCT2	ExN	0.000923443	0.116952	Mayo
CNOT2	ExN	0.000635226	0.145109	Mayo
ZFC3H1	ExN	0.01533	0.177373	Mayo
ATXN7L3B	ExN	3.76187e-06	-0.0377947	Mayo
KCNC2	ExN	2.82663e-05	-0.279431	Mayo
PHLDA1	ExN	0.000570847	0.24299	Mayo
SYT1	ExN	0.0111374	-0.186681	Mayo
PPFIA2	ExN	0.000960524	-0.124924	Mayo
ATP2B1	ExN	6.65807e-06	-0.126495	Mayo
NUDT4	ExN	7.78733e-06	0.213513	Mayo
UBE2N	ExN	2.26587e-08	-0.158024	Mayo
APAF1	ExN	0.0263646	0.0247913	Mayo
UTP20	ExN	0.00173876	0.202882	Mayo
C12orf73	ExN	3.87893e-07	-0.275806	Mayo
KIAA1033	ExN	0.001308	0.283951	Mayo
TCP11L2	ExN	2.07908e-06	0.707494	Mayo
SVOP	ExN	6.08738e-05	-0.478964	Mayo
ANAPC7	ExN	0.00115207	-0.122171	Mayo
GPN3	ExN	0.0010226	0.146463	Mayo
FAM216A	ExN	4.91802e-05	-0.107877	Mayo
VPS29	ExN	0.00811324	0.0184669	Mayo
ERP29	ExN	0.00686628	-0.133346	Mayo
HECTD4	ExN	0.015928	0.124963	Mayo
CFAP73	ExN	0.0037646	-0.265479	Mayo
MED13L	ExN	4.1757e-08	0.401192	Mayo
RNFT2	ExN	2.47692e-09	-0.263773	Mayo
WSB2	ExN	1.54494e-05	-0.103777	Mayo
PEBP1	ExN	3.7349e-05	-0.197247	Mayo
SRRM4	ExN	0.000550457	-0.139529	Mayo
GCN1	ExN	0.000107992	0.326817	Mayo
DYNLL1	ExN	0.0479164	-0.0401541	Mayo
C12orf43	ExN	3.70092e-05	-0.0579855	Mayo
CAMKK2	ExN	5.62192e-08	-0.317307	Mayo
DNAH10	ExN	0.0054266	0.259997	Mayo
SCARB1	ExN	0.00550732	0.0913251	Mayo
TMEM132C	ExN	0.000174078	0.234239	Mayo
GLT1D1	ExN	0.00148899	-0.145535	Mayo
TMEM132D	ExN	0.00273666	0.00605551	Mayo
RAN	ExN	2.89922e-05	0.00849753	Mayo
ZMYM5	ExN	0.0069288	0.0452022	Mayo
ZDHHC20	ExN	0.000421045	0.172203	Mayo
PARP4	ExN	1.23745e-05	0.616845	Mayo
AMER2	ExN	7.67232e-06	0.420541	Mayo
ATP8A2	ExN	0.0078047	-0.227995	Mayo
GPR12	ExN	0.000135557	-0.244898	Mayo
RPL21	ExN	0.0127642	0.00738968	Mayo
ALOX5AP	ExN	0.0256485	0.245693	Mayo
CCNA1	ExN	0.0142529	-0.082112	Mayo
PROSER1	ExN	0.0404959	0.105582	Mayo
HTR2A	ExN	0.000853593	-0.165974	Mayo
RCBTB1	ExN	0.0014781	0.139994	Mayo
SPRYD7	ExN	5.76213e-05	-0.175426	Mayo
WDFY2	ExN	7.6649e-05	0.303072	Mayo
PCDH9	ExN	0.000701983	0.326355	Mayo
KCTD12	ExN	0.00268493	0.382621	Mayo
NDFIP2	ExN	0.00758835	-0.103754	Mayo
HS6ST3	ExN	0.000358692	-0.114743	Mayo
DOCK9	ExN	0.00107449	0.18819	Mayo
FGF14	ExN	1.13764e-05	-0.084057	Mayo
ATP11A	ExN	1.00385e-05	0.453632	Mayo
TMCO3	ExN	0.00353858	0.180711	Mayo
RASA3	ExN	0.00952253	-0.0240432	Mayo
CHD8	ExN	0.000136652	0.157986	Mayo
ABHD4	ExN	4.84057e-08	0.590704	Mayo
HOMEZ	ExN	0.000265583	0.105945	Mayo
SLC22A17	ExN	9.36053e-06	-0.188917	Mayo
NEDD8	ExN	8.12609e-07	-0.212618	Mayo
KHNYN	ExN	6.73788e-05	0.239644	Mayo
NOVA1	ExN	3.59478e-09	-0.318736	Mayo
AP4S1	ExN	0.00212621	-0.12502	Mayo
BAZ1A	ExN	0.000594796	0.403532	Mayo
TRAPPC6B	ExN	2.87664e-06	-0.207045	Mayo
LRFN5	ExN	0.00447874	0.0340632	Mayo
FKBP3	ExN	8.86902e-06	-0.254674	Mayo
SOS2	ExN	0.000394552	0.221862	Mayo
MAP4K5	ExN	0.00261321	0.182617	Mayo
ATL1	ExN	0.0416047	-0.0170489	Mayo
GNG2	ExN	0.0124771	-0.0319112	Mayo
STYX	ExN	0.013802	0.115381	Mayo
SAMD4A	ExN	9.19268e-05	0.592999	Mayo
RTN1	ExN	0.00130984	-0.182296	Mayo
HIF1A	ExN	4.09891e-05	0.330668	Mayo
SYT16	ExN	0.000114144	-0.206322	Mayo
AKAP5	ExN	0.00151431	-0.127496	Mayo
FNTB	ExN	0.0176497	0.123434	Mayo
MPP5	ExN	0.00385652	0.247577	Mayo
ATP6V1D	ExN	2.61114e-06	-0.167794	Mayo
ZFYVE26	ExN	0.000870166	0.230125	Mayo
RAD51B	ExN	3.24165e-07	0.274257	Mayo
ERH	ExN	0.00101833	-0.10622	Mayo
SUSD6	ExN	0.000860629	0.192998	Mayo
TTC9	ExN	3.63533e-05	0.0601823	Mayo
MAP3K9	ExN	0.000150105	-0.169464	Mayo
ACOT4	ExN	0.000236313	-0.0737399	Mayo
PNMA1	ExN	1.06686e-05	0.00706131	Mayo
ELMSAN1	ExN	0.00265972	0.211981	Mayo
PROX2	ExN	0.0413069	0.063273	Mayo
MLH3	ExN	0.0298972	0.0171106	Mayo
NEK9	ExN	0.0201647	0.17958	Mayo
GPATCH2L	ExN	0.00025881	0.190999	Mayo
ANGEL1	ExN	0.0111121	0.127742	Mayo
SPTLC2	ExN	2.25009e-05	0.255114	Mayo
NRXN3	ExN	4.13489e-09	-0.55644	Mayo
GALC	ExN	0.000677604	0.188187	Mayo
NRDE2	ExN	0.00193995	0.217719	Mayo
RIN3	ExN	0.0271551	0.289681	Mayo
MOAP1	ExN	9.26804e-06	-0.167194	Mayo
ASB2	ExN	0.000149068	-0.298053	Mayo
OTUB2	ExN	0.0161254	-0.0570999	Mayo
DICER1	ExN	0.000206241	0.197269	Mayo
CLMN	ExN	4.79104e-05	0.654364	Mayo
SYNE3	ExN	0.000461683	0.174883	Mayo
GLRX5	ExN	1.03224e-05	-0.0963408	Mayo
GSKIP	ExN	4.08463e-06	-0.235964	Mayo
WDR25	ExN	0.00204126	-0.0819814	Mayo
WDR20	ExN	0.00352474	0.0624138	Mayo
CDC42BPB	ExN	0.0112778	0.0806333	Mayo
KLC1	ExN	4.88067e-07	-0.249219	Mayo
C14orf2	ExN	1.42065e-08	-0.329965	Mayo
NDN	ExN	0.00216866	-0.156608	Mayo
SNRPN	ExN	1.31411e-06	-0.204929	Mayo
GABRB3	ExN	0.00241937	-0.0159306	Mayo
HERC2	ExN	0.00377119	0.164882	Mayo
TJP1	ExN	0.00038535	0.231143	Mayo
MTMR10	ExN	2.09382e-06	0.397984	Mayo
KLF13	ExN	0.00484884	0.152	Mayo
SCG5	ExN	7.46906e-06	-0.293024	Mayo
EMC7	ExN	0.00497826	0.00122945	Mayo
EMC4	ExN	0.00288583	-0.0573105	Mayo
NOP10	ExN	0.000716184	-0.0263605	Mayo
C15orf52	ExN	0.0161868	0.130489	Mayo
MGA	ExN	0.000270575	0.277495	Mayo
TMEM87A	ExN	1.62748e-05	0.297219	Mayo
ZSCAN29	ExN	0.00214391	0.222465	Mayo
SPG11	ExN	0.00324943	0.182678	Mayo
TNFAIP8L3	ExN	0.00268054	0.0537752	Mayo
SCG3	ExN	7.39391e-05	-0.16035	Mayo
GNB5	ExN	2.16368e-08	-0.180124	Mayo
ARPP19	ExN	0.00982251	-0.115131	Mayo
MYO1E	ExN	6.14809e-05	0.328738	Mayo
FAM81A	ExN	7.07282e-06	-0.197001	Mayo
ICE2	ExN	0.000592432	0.248175	Mayo
VPS13C	ExN	0.000362632	0.340777	Mayo
SNX1	ExN	0.000134989	0.0927633	Mayo
ZNF609	ExN	0.000283994	0.238284	Mayo
OAZ2	ExN	0.0300001	-0.0575356	Mayo
RASL12	ExN	0.000440354	0.82059	Mayo
DENND4A	ExN	0.000411412	0.218546	Mayo
RAB11A	ExN	0.000103431	0.00285068	Mayo
MEGF11	ExN	0.00238917	0.235204	Mayo
SNAPC5	ExN	7.94766e-07	-0.181349	Mayo
AAGAB	ExN	3.06854e-06	-0.0146857	Mayo
NEO1	ExN	3.53682e-09	0.458651	Mayo
NPTN	ExN	3.47227e-07	-0.107468	Mayo
STOML1	ExN	0.000311903	-0.188134	Mayo
PML	ExN	8.45594e-05	0.307587	Mayo
SCAMP2	ExN	0.000181264	0.21473	Mayo
COX5A	ExN	0.000123819	-0.154848	Mayo
SCAMP5	ExN	2.92317e-05	-0.14049	Mayo
C15orf39	ExN	4.87825e-06	0.275862	Mayo
SIN3A	ExN	1.86329e-05	0.192284	Mayo
IMP3	ExN	0.000559144	-0.063175	Mayo
TMEM266	ExN	0.00238595	-0.204223	Mayo
TBC1D2B	ExN	9.71994e-07	0.370983	Mayo
PSMA4	ExN	0.000190952	-0.0579409	Mayo
IL16	ExN	0.0300587	-0.0958749	Mayo
AP3B2	ExN	3.917e-07	-0.215913	Mayo
ADAMTSL3	ExN	1.81026e-07	0.923163	Mayo
ZNF592	ExN	0.00204051	0.221356	Mayo
AKAP13	ExN	6.14208e-06	0.443833	Mayo
MRPS11	ExN	0.000109891	-0.127404	Mayo
CRTC3	ExN	3.69822e-05	0.217883	Mayo
MAN2A2	ExN	0.0031172	0.173462	Mayo
SV2B	ExN	0.0059315	-0.198465	Mayo
SLCO3A1	ExN	0.000203946	0.196077	Mayo
CHD2	ExN	0.0362995	0.0894529	Mayo
IGF1R	ExN	8.60603e-06	0.387931	Mayo
TTC23	ExN	2.49185e-05	0.335418	Mayo
TM2D3	ExN	0.000383166	-0.159897	Mayo
POLR3K	ExN	1.66955e-06	-0.183427	Mayo
MPG	ExN	0.0028239	-0.145599	Mayo
SYNGR3	ExN	6.06114e-05	-0.191595	Mayo
NTHL1	ExN	1.39125e-05	-0.326821	Mayo
TCEB2	ExN	6.44809e-06	-0.278039	Mayo
ZSCAN32	ExN	0.0236711	0.00939485	Mayo
CDIP1	ExN	0.00301499	-0.00983298	Mayo
RBFOX1	ExN	0.000384802	-0.210166	Mayo
GRIN2A	ExN	0.00863231	-0.184314	Mayo
CLEC16A	ExN	0.0362351	0.0854361	Mayo
SNX29	ExN	3.52562e-05	0.113155	Mayo
C16orf45	ExN	0.000135557	-0.116481	Mayo
NDE1	ExN	1.73537e-05	0.263637	Mayo
SMG1	ExN	0.00946119	0.220003	Mayo
CRYM	ExN	0.000392453	-0.475522	Mayo
PRKCB	ExN	0.00112629	-0.13427	Mayo
CACNG3	ExN	0.000914178	-0.0812566	Mayo
PRRT2	ExN	6.7461e-06	-0.216757	Mayo
SEZ6L2	ExN	2.73162e-08	-0.463464	Mayo
KCTD13	ExN	3.91138e-05	-0.304059	Mayo
SRCAP	ExN	0.0369085	0.150041	Mayo
STX1B	ExN	3.49813e-05	-0.213945	Mayo
ORC6	ExN	0.00025444	-0.272473	Mayo
DNAJA2	ExN	9.71994e-07	-0.0240645	Mayo
NKD1	ExN	0.000586555	0.387385	Mayo
RBL2	ExN	9.8322e-06	0.42207	Mayo
RPGRIP1L	ExN	1.07484e-05	-0.145164	Mayo
LPCAT2	ExN	0.00550732	0.07847	Mayo
CETP	ExN	0.0130401	-0.0887177	Mayo
CFAP20	ExN	0.00439365	-0.0322297	Mayo
NDRG4	ExN	1.1562e-07	-0.21196	Mayo
CNOT1	ExN	4.10844e-07	0.365345	Mayo
CMTM3	ExN	0.00605139	0.309846	Mayo
CBFB	ExN	0.000461065	0.238475	Mayo
TMEM208	ExN	0.000686968	-0.190636	Mayo
SLC7A6	ExN	0.0165924	0.060278	Mayo
DHX38	ExN	5.51071e-05	0.181619	Mayo
ZFHX3	ExN	0.000231032	0.442966	Mayo
GLG1	ExN	1.07292e-05	0.326449	Mayo
TERF2IP	ExN	2.09382e-06	-0.213127	Mayo
WWOX	ExN	1.32295e-07	0.380023	Mayo
CMC2	ExN	1.73669e-05	-0.210017	Mayo
GAN	ExN	2.58331e-05	0.313431	Mayo
MLYCD	ExN	0.0470873	0.147967	Mayo
KCNG4	ExN	0.00812689	0.0731466	Mayo
TRAPPC2L	ExN	3.175e-05	-0.32887	Mayo
ANKRD11	ExN	0.00460034	0.157553	Mayo
GLOD4	ExN	0.000689051	-0.103584	Mayo
PRPF8	ExN	5.8629e-05	0.220473	Mayo
RTN4RL1	ExN	0.000842749	-0.0212997	Mayo
SMG6	ExN	0.000164329	0.197905	Mayo
METTL16	ExN	0.0354628	0.177785	Mayo
NCBP3	ExN	0.00550476	-0.00604795	Mayo
ZZEF1	ExN	0.0169707	0.154712	Mayo
ANKFY1	ExN	9.10375e-06	0.454753	Mayo
NLRP1	ExN	0.000129453	-0.0841579	Mayo
RNASEK-C17orf49	ExN	0.000459792	-0.198813	Mayo
ZBTB4	ExN	0.00166605	0.094083	Mayo
VAMP2	ExN	1.14956e-06	-0.311039	Mayo
NDEL1	ExN	1.00719e-05	0.00525051	Mayo
MAP2K4	ExN	0.000161116	0.00101678	Mayo
NCOR1	ExN	9.35696e-06	0.235866	Mayo
MPRIP	ExN	0.0057298	0.139436	Mayo
LLGL1	ExN	0.000161125	0.0953667	Mayo
SMCR8	ExN	0.000140498	0.501675	Mayo
B9D1	ExN	0.000141737	-0.295748	Mayo
SPECC1	ExN	0.00237876	0.0316426	Mayo
DHRS7B	ExN	0.00277457	-0.0887692	Mayo
KSR1	ExN	0.00128064	0.0985037	Mayo
LYRM9	ExN	3.18325e-05	-0.647986	Mayo
NLK	ExN	1.14432e-05	-0.181529	Mayo
POLDIP2	ExN	0.00199981	-0.0282819	Mayo
SLC46A1	ExN	0.00718283	0.147078	Mayo
PHF12	ExN	0.00892553	0.10636	Mayo
SEZ6	ExN	5.63122e-06	-0.450448	Mayo
NUFIP2	ExN	0.000156774	0.337608	Mayo
TAOK1	ExN	3.1285e-07	0.337132	Mayo
SSH2	ExN	0.0421411	0.0368778	Mayo
CDK5R1	ExN	0.000105038	-0.0862125	Mayo
MYO1D	ExN	3.19034e-05	0.298208	Mayo
ASIC2	ExN	0.00025296	-0.226744	Mayo
AP2B1	ExN	0.000101402	-0.0339387	Mayo
CDK12	ExN	2.24161e-05	0.287384	Mayo
NT5C3B	ExN	0.000117456	-0.105803	Mayo
DNAJC7	ExN	9.17949e-05	-0.109073	Mayo
STAT5B	ExN	3.1632e-07	0.196444	Mayo
STAT5A	ExN	0.0113984	0.256506	Mayo
STAT3	ExN	4.42575e-08	0.699213	Mayo
ATP6V0A1	ExN	6.32767e-06	-0.247157	Mayo
TUBG2	ExN	2.5297e-06	-0.314504	Mayo
COA3	ExN	8.81551e-07	-0.328961	Mayo
CNTD1	ExN	0.000771393	-0.181034	Mayo
NBR1	ExN	5.9742e-06	0.188793	Mayo
GPATCH8	ExN	0.00555734	0.20306	Mayo
PLCD3	ExN	0.000234536	0.453498	Mayo
HEXIM2	ExN	0.00172246	-0.0982244	Mayo
NSF	ExN	0.000641119	-0.195766	Mayo
CALCOCO2	ExN	4.11351e-07	0.38523	Mayo
ZNF652	ExN	0.00224802	0.297319	Mayo
SLC35B1	ExN	0.0119347	-0.0461158	Mayo
SPAG9	ExN	1.3703e-05	0.288114	Mayo
CA10	ExN	2.43624e-06	-0.253389	Mayo
DYNLL2	ExN	9.32754e-05	-0.242345	Mayo
TRIM37	ExN	2.01021e-06	-0.149369	Mayo
HEATR6	ExN	0.047071	0.159422	Mayo
USP32	ExN	0.000793804	0.366509	Mayo
MAP3K3	ExN	0.00502413	0.196467	Mayo
TEX2	ExN	7.60419e-06	0.214514	Mayo
SMURF2	ExN	0.000172404	0.18318	Mayo
GNA13	ExN	2.81909e-07	0.596807	Mayo
CACNG5	ExN	0.000848642	0.227029	Mayo
HELZ	ExN	9.79863e-05	0.170614	Mayo
PSMD12	ExN	0.000262124	-0.0453926	Mayo
BPTF	ExN	0.0166224	0.137045	Mayo
ABCA6	ExN	0.00881701	0.246754	Mayo
ATP5H	ExN	6.40766e-06	-0.258527	Mayo
HN1	ExN	5.03716e-06	-0.295308	Mayo
CASKIN2	ExN	8.17982e-05	0.21448	Mayo
ST6GALNAC2	ExN	2.03572e-05	0.380349	Mayo
RNF213	ExN	0.000105038	0.265007	Mayo
ARL16	ExN	0.00423216	-0.236595	Mayo
ARHGDIA	ExN	0.0016696	-0.194344	Mayo
ADCYAP1	ExN	4.64926e-07	-0.941311	Mayo
DLGAP1	ExN	0.000170901	-0.183284	Mayo
PIEZO2	ExN	0.00750589	0.536375	Mayo
SEH1L	ExN	5.0416e-07	-0.165733	Mayo
TMEM241	ExN	0.000156876	-0.163789	Mayo
NPC1	ExN	2.40336e-05	0.508025	Mayo
TTC39C	ExN	0.000174139	-0.114496	Mayo
SS18	ExN	2.95683e-05	0.171853	Mayo
DSC2	ExN	0.000876339	0.540375	Mayo
NOL4	ExN	8.86856e-07	-0.0763647	Mayo
ZNF24	ExN	1.70263e-06	0.356566	Mayo
TPGS2	ExN	4.59874e-05	-0.107151	Mayo
CELF4	ExN	9.30214e-05	-0.141161	Mayo
SYT4	ExN	0.0423265	-0.18472	Mayo
EPG5	ExN	0.0154459	0.106989	Mayo
RNF165	ExN	1.74843e-05	-0.335912	Mayo
SMAD2	ExN	2.48959e-05	0.161641	Mayo
TXNL1	ExN	0.000229998	-0.0899136	Mayo
ST8SIA3	ExN	3.37878e-05	-0.140544	Mayo
ZNF532	ExN	0.0176577	0.150235	Mayo
LMAN1	ExN	1.94348e-05	0.381452	Mayo
RNF152	ExN	0.00750714	0.32998	Mayo
KDSR	ExN	3.60056e-05	0.172674	Mayo
SOCS6	ExN	0.00205958	0.284283	Mayo
ZNF236	ExN	0.0218268	0.0924153	Mayo
TXNL4A	ExN	0.00534313	-0.108763	Mayo
NRSN2	ExN	8.82778e-05	-0.174419	Mayo
NSFL1C	ExN	0.00139285	-0.0576849	Mayo
IDH3B	ExN	0.000101904	-0.0349229	Mayo
ITPA	ExN	2.97479e-05	-0.285415	Mayo
C20orf194	ExN	0.0100849	0.105216	Mayo
SPEF1	ExN	1.97754e-07	-0.526002	Mayo
CHGB	ExN	0.00278262	-0.424104	Mayo
TMX4	ExN	8.06358e-05	0.024986	Mayo
PAK7	ExN	3.37294e-05	-0.106965	Mayo
SNAP25	ExN	0.000183624	-0.270661	Mayo
MKKS	ExN	1.09889e-05	-0.0564673	Mayo
MACROD2	ExN	9.30214e-05	-0.147899	Mayo
KIF16B	ExN	2.76743e-05	0.218329	Mayo
PCSK2	ExN	0.00851876	0.000408284	Mayo
DSTN	ExN	6.20359e-06	-0.0389436	Mayo
RRBP1	ExN	0.000139373	0.200427	Mayo
CSRP2BP	ExN	0.00220885	-0.0627429	Mayo
RALGAPA2	ExN	0.00370969	0.288987	Mayo
NAPB	ExN	0.00368472	-0.201052	Mayo
ASXL1	ExN	4.68941e-05	0.213745	Mayo
CHMP4B	ExN	2.87648e-05	-0.141704	Mayo
ITCH	ExN	7.66881e-05	0.17172	Mayo
MAP1LC3A	ExN	7.16418e-07	-0.521315	Mayo
NCOA6	ExN	0.0228624	0.172818	Mayo
EIF6	ExN	0.000359196	-0.0969256	Mayo
C20orf24	ExN	0.00100483	0.111714	Mayo
NDRG3	ExN	0.000165441	-0.0915428	Mayo
SOGA1	ExN	0.00353858	0.267468	Mayo
MANBAL	ExN	1.84828e-05	-0.172023	Mayo
VSTM2L	ExN	0.000539372	-0.177947	Mayo
PPP1R16B	ExN	0.0431664	0.148571	Mayo
CHD6	ExN	0.000169715	0.19311	Mayo
JPH2	ExN	0.000229782	0.407067	Mayo
YWHAB	ExN	2.96943e-05	-0.131828	Mayo
SLC12A5	ExN	0.000237029	-0.182993	Mayo
CDH22	ExN	0.000523961	-0.241487	Mayo
ELMO2	ExN	0.0399689	0.10648	Mayo
NCOA3	ExN	6.66667e-05	0.322372	Mayo
PREX1	ExN	8.00813e-06	0.351517	Mayo
ZNFX1	ExN	4.72961e-06	0.273776	Mayo
RNF114	ExN	0.00574043	0.113251	Mayo
MOCS3	ExN	6.4316e-05	0.0111349	Mayo
ZNF217	ExN	1.38998e-05	0.483341	Mayo
PFDN4	ExN	9.87018e-07	-0.229146	Mayo
ATP5E	ExN	3.64156e-06	-0.314376	Mayo
FAM217B	ExN	8.23334e-05	-0.0848154	Mayo
CDH26	ExN	0.00361299	0.244666	Mayo
PSMA7	ExN	0.00129746	-0.0737608	Mayo
DIDO1	ExN	0.0487094	0.149097	Mayo
EEF1A2	ExN	0.000298618	-0.191419	Mayo
TCEA2	ExN	1.11086e-05	-0.316513	Mayo
SBNO2	ExN	0.00256544	0.313587	Mayo
OAZ1	ExN	8.58139e-05	-0.0871141	Mayo
LSM7	ExN	0.000142772	-0.211713	Mayo
ZNF555	ExN	0.000726799	0.321447	Mayo
CELF5	ExN	0.00118099	-0.270402	Mayo
MRPL54	ExN	0.000127342	-0.226359	Mayo
MYDGF	ExN	0.0104341	-0.147183	Mayo
C19orf70	ExN	9.55718e-08	-0.388079	Mayo
NDUFA11	ExN	8.80376e-07	-0.277215	Mayo
PEX11G	ExN	0.00138324	-0.381545	Mayo
MCOLN1	ExN	0.00021214	-0.190318	Mayo
TGFBR3L	ExN	1.12206e-05	-0.483078	Mayo
UBL5	ExN	7.13096e-06	-0.224383	Mayo
PIN1	ExN	2.78156e-07	-0.329891	Mayo
ICAM5	ExN	0.00200466	-0.138602	Mayo
CDKN2D	ExN	2.78592e-05	-0.239893	Mayo
DNM2	ExN	1.10703e-05	0.0983225	Mayo
TMEM205	ExN	4.23869e-05	-0.185652	Mayo
CNN1	ExN	0.000430826	0.207172	Mayo
WDR83OS	ExN	0.000134584	-0.14909	Mayo
PRKACA	ExN	0.000330462	-0.157069	Mayo
SLC1A6	ExN	1.43507e-05	-0.394981	Mayo
TMEM38A	ExN	5.56332e-07	-0.195036	Mayo
F2RL3	ExN	0.000998694	0.481255	Mayo
UNC13A	ExN	0.00218513	-0.130701	Mayo
RAB3A	ExN	0.000449772	-0.23421	Mayo
LSM4	ExN	1.05379e-06	-0.298832	Mayo
TMEM59L	ExN	2.29323e-06	-0.357428	Mayo
DDX49	ExN	9.35364e-05	-0.138164	Mayo
NDUFA13	ExN	2.26498e-06	-0.36637	Mayo
ZNF253	ExN	0.0345995	0.183676	Mayo
ZNF708	ExN	0.00518243	0.00977059	Mayo
POP4	ExN	0.00196113	-0.00330473	Mayo
ZNF507	ExN	0.0419514	0.106547	Mayo
KIAA0355	ExN	1.19498e-05	0.191311	Mayo
ZNF599	ExN	0.00444283	0.106875	Mayo
ZNF792	ExN	6.14208e-06	0.396068	Mayo
COX6B1	ExN	3.8433e-08	-0.300886	Mayo
CLIP3	ExN	5.91373e-06	-0.211511	Mayo
ZNF260	ExN	0.000401074	0.223822	Mayo
PSMD8	ExN	0.000926932	-0.0853408	Mayo
SARS2	ExN	5.10314e-05	-0.253866	Mayo
MRPS12	ExN	0.000140169	-0.167581	Mayo
EID2B	ExN	8.92115e-05	-0.479443	Mayo
HIPK4	ExN	0.0026984	-0.132758	Mayo
ATP1A3	ExN	0.000156931	-0.238143	Mayo
CIC	ExN	7.38726e-05	0.32331	Mayo
TOMM40	ExN	0.000136511	-0.165574	Mayo
PNMAL1	ExN	0.000350711	-0.0756146	Mayo
CALM3	ExN	8.35707e-06	-0.22545	Mayo
SLC1A5	ExN	0.0347518	0.512291	Mayo
SAE1	ExN	3.36835e-05	0.0171619	Mayo
MEIS3	ExN	0.000667648	-0.349004	Mayo
SEPW1	ExN	5.59794e-06	-0.245872	Mayo
CYTH2	ExN	0.00151006	-0.112003	Mayo
SLC17A7	ExN	0.0038057	-0.172232	Mayo
PIH1D1	ExN	0.00137039	-0.193549	Mayo
POLD1	ExN	0.0344714	0.175269	Mayo
ZNF160	ExN	0.00608339	0.0497437	Mayo
PRKCG	ExN	0.0112121	-0.282057	Mayo
SYT5	ExN	5.39272e-05	-0.206031	Mayo
HSPBP1	ExN	3.86605e-06	-0.30155	Mayo
NAT14	ExN	0.000354043	-0.267986	Mayo
ZNF805	ExN	5.05933e-07	0.390626	Mayo
ZNF460	ExN	0.000246097	0.488214	Mayo
ZNF418	ExN	0.00632312	-0.106736	Mayo
DDX3Y	ExN	5.37988e-18	-0.814773	Mayo
IL17RA	ExN	0.00646635	0.212984	Mayo
ATP6V1E1	ExN	1.85288e-05	-0.231022	Mayo
CLTCL1	ExN	0.0212849	0.133337	Mayo
RTN4R	ExN	0.000244395	-0.150193	Mayo
PITPNB	ExN	1.7385e-05	-0.0802006	Mayo
LIMK2	ExN	0.00103983	0.645661	Mayo
PRR14L	ExN	0.00152069	0.219396	Mayo
YWHAH	ExN	0.00786367	-0.0211892	Mayo
MYH9	ExN	1.51773e-05	0.424369	Mayo
DNAL4	ExN	9.80942e-06	-0.368017	Mayo
NPTXR	ExN	1.60425e-05	-0.318717	Mayo
SYNGR1	ExN	3.36835e-05	-0.170863	Mayo
FAM83F	ExN	0.0266795	0.150508	Mayo
EP300	ExN	4.99467e-06	0.418698	Mayo
TOB2	ExN	0.00283943	0.26144	Mayo
CCDC134	ExN	9.23251e-05	0.280667	Mayo
NDUFA6	ExN	1.19807e-05	-0.0797798	Mayo
ATXN10	ExN	0.000179417	-0.0226166	Mayo
ATP5J	ExN	1.85262e-08	-0.305427	Mayo
BACH1	ExN	2.7381e-05	0.379497	Mayo
SOD1	ExN	0.000444792	-0.0781667	Mayo
HUNK	ExN	2.17203e-07	-0.476526	Mayo
SYNJ1	ExN	0.00654962	0.0287507	Mayo
PAXBP1	ExN	0.0372147	0.16665	Mayo
SON	ExN	2.01348e-06	0.405026	Mayo
HLCS	ExN	0.00539014	0.148026	Mayo
DSCR3	ExN	0.00114757	0.161692	Mayo
ZBTB21	ExN	0.000684572	0.237392	Mayo
CBS	ExN	0.048346	0.279645	Mayo
TRAPPC10	ExN	4.1204e-05	0.554185	Mayo
DIP2A	ExN	0.0337394	-0.0586236	Mayo
SLC5A9	InN	0.00428053	-0.0174448	Mayo
PM20D1	InN	0.0136451	-0.00463924	Mayo
NENF	InN	1.3424e-07	-0.133028	Mayo
SLC4A9	InN	0.00140963	0.0191091	Mayo
ATOX1	InN	9.00917e-09	-0.0994908	Mayo
TIMD4	InN	0.035436	-0.00400293	Mayo
GCM2	InN	0.00545955	-0.00905702	Mayo
ZFP57	InN	7.33493e-07	-0.190226	Mayo
FBXO24	InN	6.23272e-07	-0.0882142	Mayo
KEL	InN	3.81344e-11	-0.181842	Mayo
HSD17B3	InN	6.31805e-06	-0.136741	Mayo
PAAF1	InN	5.17266e-10	-0.134545	Mayo
RASSF9	InN	1.42145e-06	0.160797	Mayo
SLC51B	InN	0.000782766	0.0347126	Mayo
MYO9A	InN	2.03482e-07	0.0939416	Mayo
TMEM256	InN	2.03343e-09	-0.12398	Mayo
KLHL11	InN	0.000201178	0.166774	Mayo
ELANE	InN	0.0403688	-0.0516062	Mayo
GDF15	InN	0.000164805	-0.00365938	Mayo
MYBPC2	InN	0.0170274	-0.0105867	Mayo
TP73	Micro	0.000197013	-0.0991045	Mayo
HSPB7	Micro	2.66884e-08	0.231647	Mayo
SARS	Micro	8.35103e-05	0.0248469	Mayo
PCP4L1	Micro	1.92876e-05	-0.0192622	Mayo
ACP1	Micro	0.000403621	0.0166513	Mayo
SLC4A1AP	Micro	8.09638e-05	0.0229437	Mayo
RTN4	Micro	6.99848e-07	0.0031051	Mayo
CCDC85A	Micro	0.000119897	0.0292615	Mayo
C1D	Micro	7.82382e-05	0.0102085	Mayo
IMMT	Micro	0.00103612	0.0240619	Mayo
NGEF	Micro	0.000473974	0.0581991	Mayo
DYNC1LI1	Micro	0.000550857	0.0442258	Mayo
PDHB	Micro	0.007182	0.0247036	Mayo
ARL6IP5	Micro	0.0306301	0.0470497	Mayo
GTPBP8	Micro	0.0173807	0.0181608	Mayo
SPCS3	Micro	0.00147586	0.0283046	Mayo
PAM	Micro	8.60756e-07	0.0897824	Mayo
FSTL4	Micro	0.0239551	0.146012	Mayo
DCDC2	Micro	0.001822	0.0427349	Mayo
VWA7	Micro	0.000956523	0.0218159	Mayo
TNFRSF21	Micro	0.000849283	-0.0408965	Mayo
TPBG	Micro	0.0180067	0.078411	Mayo
PREP	Micro	2.61706e-05	0.0345894	Mayo
VSTM2A	Micro	0.00794088	0.0511936	Mayo
PLXNA4	Micro	0.00036643	0.194514	Mayo
AGK	Micro	0.000669175	0.0135864	Mayo
SH3KBP1	Micro	0.00138825	-0.0251256	Mayo
MAGEH1	Micro	0.000510334	0.0179712	Mayo
PGK1	Micro	0.0118212	0.0411049	Mayo
ZMAT4	Micro	5.03818e-05	-0.00944398	Mayo
SNTG1	Micro	0.00151411	-0.0349767	Mayo
NECAB1	Micro	0.0217551	-0.0294899	Mayo
SLC25A32	Micro	0.0312869	0.028213	Mayo
FAM49B	Micro	0.000169391	-0.0142323	Mayo
AUH	Micro	0.00488457	0.0152669	Mayo
SUSD1	Micro	0.0298709	0.0431165	Mayo
RAB14	Micro	0.0143262	0.0347777	Mayo
PTPN5	Micro	3.74393e-06	0.01651	Mayo
ABCG4	Micro	0.00727884	0.0275965	Mayo
SRPR	Micro	0.00192538	0.0866655	Mayo
KIF5B	Micro	0.0173381	0.00491579	Mayo
ADO	Micro	0.00792915	0.0241138	Mayo
VDAC2	Micro	0.00356972	0.0246944	Mayo
KCNMA1	Micro	8.89428e-05	0.1737	Mayo
HPS6	Micro	6.53342e-05	0.0582279	Mayo
TCERG1L	Micro	0.0112152	0.0134358	Mayo
PRMT8	Micro	6.08671e-09	-0.0672327	Mayo
KITLG	Micro	0.0001724	0.116329	Mayo
BTBD11	Micro	4.94897e-06	-0.0229451	Mayo
CUX2	Micro	0.00519976	0.0869061	Mayo
PCDH8	Micro	5.10862e-07	-0.0859619	Mayo
RAP2A	Micro	0.00577319	0.0284103	Mayo
GMPR2	Micro	0.00328629	0.0278083	Mayo
STXBP6	Micro	0.00614984	0.0137265	Mayo
CHP1	Micro	6.88433e-09	0.00811542	Mayo
EHD4	Micro	1.1098e-05	0.0632242	Mayo
CCNDBP1	Micro	0.000592328	0.0268853	Mayo
EID1	Micro	0.00187924	0.0486553	Mayo
RCN2	Micro	0.0027288	0.0387806	Mayo
RASGRF1	Micro	2.32873e-06	-0.148205	Mayo
TM6SF1	Micro	0.0165987	-0.00125247	Mayo
UQCRC2	Micro	0.00173148	0.0289037	Mayo
CIAPIN1	Micro	1.07578e-06	0.0191583	Mayo
NAE1	Micro	0.0164161	0.0166934	Mayo
FADS6	Micro	0.00548201	0.0177104	Mayo
MPPE1	Micro	0.000548953	0.0396929	Mayo
AFG3L2	Micro	0.00137882	0.0490458	Mayo
TMX3	Micro	9.37561e-05	0.0427894	Mayo
TM9SF4	Micro	0.00140832	0.0188934	Mayo
CBLN4	Micro	8.843e-06	0.00695265	Mayo
TMEM240	Oligo	0.0020671	-0.00242844	Mayo
GNB1	Oligo	2.63852e-05	0.084224	Mayo
SKI	Oligo	2.0406e-06	0.163212	Mayo
FAM213B	Oligo	0.000500828	0.24676	Mayo
GPR153	Oligo	0.0132842	0.245973	Mayo
VAMP3	Oligo	3.85267e-05	-0.0514734	Mayo
CLSTN1	Oligo	4.97022e-06	0.137347	Mayo
FBXO44	Oligo	0.00418533	0.0493406	Mayo
FBXO6	Oligo	0.0003373	0.183276	Mayo
PADI2	Oligo	0.000504354	-0.00217832	Mayo
NBL1	Oligo	0.00375806	0.0827006	Mayo
KDM1A	Oligo	0.000193909	0.139123	Mayo
LUZP1	Oligo	0.000165461	0.343159	Mayo
GALE	Oligo	0.00391705	0.0251284	Mayo
NIPAL3	Oligo	1.34848e-05	-0.224894	Mayo
LDLRAP1	Oligo	0.0130035	-0.208915	Mayo
MTFR1L	Oligo	0.0217155	0.00391653	Mayo
DHDDS	Oligo	0.000559397	0.055115	Mayo
PUM1	Oligo	7.4881e-05	0.102263	Mayo
ADGRB2	Oligo	0.000212882	0.0474024	Mayo
CCDC28B	Oligo	0.000983142	0.0535167	Mayo
AK2	Oligo	0.000177666	-0.121735	Mayo
PHC2	Oligo	0.00479241	-0.0723285	Mayo
SNIP1	Oligo	0.000761428	0.0897727	Mayo
MANEAL	Oligo	0.000279743	0.0665569	Mayo
HPCAL4	Oligo	0.0023629	0.17261	Mayo
NFYC	Oligo	0.00113357	0.024857	Mayo
KCNQ4	Oligo	0.0171739	0.0473975	Mayo
SCMH1	Oligo	0.000123086	0.185953	Mayo
FOXJ3	Oligo	0.000141698	0.0658022	Mayo
RIMKLA	Oligo	0.000348744	0.190801	Mayo
ST3GAL3	Oligo	8.48149e-05	-0.0558552	Mayo
IPO13	Oligo	0.00296278	-0.164753	Mayo
CCDC24	Oligo	0.00132656	-0.0556247	Mayo
TESK2	Oligo	0.000367926	-0.143585	Mayo
ATPAF1	Oligo	0.00170846	0.064403	Mayo
RNF11	Oligo	1.54336e-05	0.107261	Mayo
OSBPL9	Oligo	0.0398616	-0.0985417	Mayo
MAGOH	Oligo	0.00901395	0.0118995	Mayo
LRP8	Oligo	4.03269e-05	0.390452	Mayo
TTC22	Oligo	2.09382e-06	0.134671	Mayo
PRKAA2	Oligo	5.21887e-05	0.111591	Mayo
DAB1	Oligo	0.00194089	0.026387	Mayo
INADL	Oligo	0.000105206	0.0899118	Mayo
CACHD1	Oligo	2.8644e-06	0.452661	Mayo
RAVER2	Oligo	2.91755e-07	0.554604	Mayo
USP33	Oligo	0.000174078	0.080563	Mayo
SSX2IP	Oligo	2.21412e-05	0.301866	Mayo
DDAH1	Oligo	0.000194434	0.281268	Mayo
HS2ST1	Oligo	8.06591e-09	0.472652	Mayo
EVI5	Oligo	0.0148415	-0.0304585	Mayo
TMEM56	Oligo	7.63035e-06	0.325489	Mayo
DPYD	Oligo	4.31233e-05	0.0294757	Mayo
STXBP3	Oligo	0.0256702	-0.0696194	Mayo
AMIGO1	Oligo	5.38853e-05	0.213474	Mayo
AMPD2	Oligo	0.00207595	0.208747	Mayo
GSTM3	Oligo	0.000101184	0.476257	Mayo
KCNC4	Oligo	0.00138862	0.237747	Mayo
KCNA2	Oligo	0.00273114	0.178444	Mayo
KCND3	Oligo	2.09971e-06	0.420175	Mayo
PHTF1	Oligo	0.000455598	0.202349	Mayo
NHLH2	Oligo	0.0022569	-0.296655	Mayo
PTGFRN	Oligo	0.00402488	0.132727	Mayo
VPS45	Oligo	5.41242e-05	0.137622	Mayo
ANXA9	Oligo	0.00121462	-0.0806641	Mayo
RUSC1	Oligo	0.00014761	0.102535	Mayo
ARHGEF2	Oligo	0.00057833	-0.184614	Mayo
LMNA	Oligo	0.00202836	-0.00864097	Mayo
SEMA4A	Oligo	0.00591492	0.175332	Mayo
MEF2D	Oligo	0.00552901	0.0788955	Mayo
ARHGEF11	Oligo	0.00280185	0.144757	Mayo
CADM3	Oligo	0.00405301	0.460538	Mayo
ATP1A2	Oligo	1.15062e-05	0.549882	Mayo
SLAMF7	Oligo	0.0108727	0.0549849	Mayo
UFC1	Oligo	0.00232829	0.111333	Mayo
ADAMTS4	Oligo	0.00146611	-0.379475	Mayo
PBX1	Oligo	4.32014e-05	0.175488	Mayo
ILDR2	Oligo	5.06164e-05	0.430497	Mayo
CCDC181	Oligo	0.00300754	0.108953	Mayo
FMO4	Oligo	0.000463603	-0.0957534	Mayo
ASTN1	Oligo	0.000545765	0.356191	Mayo
RASAL2	Oligo	0.000277264	0.153505	Mayo
RALGPS2	Oligo	2.35784e-05	0.355232	Mayo
FAM20B	Oligo	1.90093e-06	0.178839	Mayo
XPR1	Oligo	1.13709e-05	0.236667	Mayo
CACNA1E	Oligo	0.018381	0.301699	Mayo
ARPC5	Oligo	0.0159885	-0.0465793	Mayo
C1orf21	Oligo	1.50628e-06	0.437466	Mayo
KLHL12	Oligo	0.00011441	0.1056	Mayo
ADIPOR1	Oligo	0.00152194	0.0341064	Mayo
TMEM183A	Oligo	2.7961e-05	0.126344	Mayo
PPFIA4	Oligo	0.00666262	0.14546	Mayo
ATP2B4	Oligo	2.17825e-08	0.400444	Mayo
LRRN2	Oligo	0.00041092	0.388073	Mayo
CNTN2	Oligo	0.000252016	-0.199554	Mayo
CDK18	Oligo	0.000348127	-0.268948	Mayo
PLXNA2	Oligo	1.02336e-06	0.429751	Mayo
LAMB3	Oligo	0.00723232	0.0805304	Mayo
TMEM206	Oligo	0.00202767	-0.171793	Mayo
SMYD2	Oligo	3.32952e-05	0.0399626	Mayo
PTPN14	Oligo	3.50106e-06	0.311754	Mayo
MARK1	Oligo	2.4314e-08	0.0979935	Mayo
MARC2	Oligo	0.00149609	0.226662	Mayo
MARC1	Oligo	8.79945e-05	0.335119	Mayo
TP53BP2	Oligo	7.69246e-06	0.354742	Mayo
SNAP47	Oligo	0.000911167	0.194445	Mayo
TRIM17	Oligo	0.0185686	-0.0498425	Mayo
PGBD5	Oligo	0.00123798	0.280538	Mayo
C1orf198	Oligo	0.000398069	-0.0567787	Mayo
SLC35F3	Oligo	0.00727768	0.157479	Mayo
COA6	Oligo	0.00105712	0.161009	Mayo
GNG4	Oligo	0.000942691	-0.0215196	Mayo
AKT3	Oligo	2.56166e-06	0.120158	Mayo
ZBTB18	Oligo	7.88195e-05	0.153799	Mayo
CNST	Oligo	2.09407e-05	0.316604	Mayo
AHCTF1	Oligo	3.88354e-06	0.185642	Mayo
ROCK2	Oligo	1.49502e-06	0.21332	Mayo
PUM2	Oligo	0.000388916	0.0902049	Mayo
RHOB	Oligo	0.0302796	-0.0624674	Mayo
EFR3B	Oligo	9.93949e-06	0.0145259	Mayo
KIF3C	Oligo	8.18834e-05	0.3751	Mayo
YPEL5	Oligo	1.96917e-05	0.144597	Mayo
EHD3	Oligo	0.000747985	0.208923	Mayo
RASGRP3	Oligo	0.00314047	-0.20601	Mayo
ATL2	Oligo	3.5927e-06	0.247786	Mayo
MTA3	Oligo	1.84704e-05	0.169516	Mayo
TTC7A	Oligo	0.0026828	-0.151825	Mayo
EML6	Oligo	0.000386445	0.094024	Mayo
UGP2	Oligo	9.83453e-05	0.15975	Mayo
SLC1A4	Oligo	0.000560872	0.35965	Mayo
CNRIP1	Oligo	2.38632e-06	0.130083	Mayo
AAK1	Oligo	0.000232369	0.0637287	Mayo
ANXA4	Oligo	0.0071495	-0.0883637	Mayo
TGFA	Oligo	0.00137721	-0.19755	Mayo
RAB11FIP5	Oligo	3.39457e-05	0.371009	Mayo
FBXO41	Oligo	0.000940039	0.345272	Mayo
STAMBP	Oligo	0.000561218	-0.0681217	Mayo
RTKN	Oligo	0.00241067	-0.208064	Mayo
SEMA4F	Oligo	0.0218332	0.0877283	Mayo
CTNNA2	Oligo	2.88543e-05	0.625375	Mayo
KCMF1	Oligo	5.64817e-05	0.214333	Mayo
CHMP3	Oligo	3.11366e-06	0.224815	Mayo
DUSP2	Oligo	0.00112938	0.00625004	Mayo
TMEM127	Oligo	0.000566786	0.134194	Mayo
SEMA4C	Oligo	0.00298929	-0.135133	Mayo
INPP4A	Oligo	0.000243943	0.166998	Mayo
LONRF2	Oligo	0.0020661	0.211261	Mayo
CHST10	Oligo	0.00343378	0.119928	Mayo
NPAS2	Oligo	0.00143652	0.304809	Mayo
[truncated: 6,848 more rows]
