# Supplementary material for: Bayesian estimation of cell type–specific gene expression with prior derived from single-cell data
Source: Genome Res. 2021 Oct;31(10):1807–18. doi: 10.1101/gr.268722.120 (PMC8494232; doi:10.1101/gr.268722.120)
Supplement: Supplemental Material [file supp_gr.268722.120_Supplemental_Table_S2.xlsx]

## Sheet: caption
Supplementary Table 2: Significant gene ontology enrichment results for CTS-DEG-ASD and CTS-DEG-AD identified by bMIND.

## Sheet: GO-ASD
query	q_value	term_size	query_size	intersection_size	term_id	source	term_name
ExN	4.83872e-14	1362	470	88	GO:0045202	GO:CC	synapse
ExN	7.8261e-12	2288	470	116	GO:0042995	GO:CC	cell projection
ExN	1.45471e-10	2432	449	121	GO:0007399	GO:BP	nervous system development
ExN	1.53828e-10	638	470	50	GO:0098794	GO:CC	postsynapse
ExN	3.26358e-10	2200	470	108	GO:0120025	GO:CC	plasma membrane bounded cell projection
ExN	3.46082e-10	368	470	36	GO:0098978	GO:CC	glutamatergic synapse
ExN	1.27383e-09	1578	449	88	GO:0030030	GO:BP	cell projection organization
ExN	1.27383e-09	2215	449	110	GO:0048468	GO:BP	cell development
ExN	2.89401e-09	1153	470	68	GO:0098590	GO:CC	plasma membrane region
ExN	5.67963e-09	390	470	35	GO:0097060	GO:CC	synaptic membrane
ExN	6.07355e-09	457	449	40	GO:0099177	GO:BP	regulation of trans-synaptic signaling
ExN	6.07355e-09	456	449	40	GO:0050804	GO:BP	modulation of chemical synaptic transmission
ExN	1.16886e-08	430	449	38	GO:0050808	GO:BP	synapse organization
ExN	1.16886e-08	717	449	51	GO:0098916	GO:BP	anterograde trans-synaptic signaling
ExN	1.16886e-08	717	449	51	GO:0007268	GO:BP	chemical synaptic transmission
ExN	1.65711e-08	726	449	51	GO:0099537	GO:BP	trans-synaptic signaling
ExN	1.93998e-08	1679	449	87	GO:0022008	GO:BP	neurogenesis
ExN	3.23617e-08	745	449	51	GO:0099536	GO:BP	synaptic signaling
ExN	3.23617e-08	1068	449	64	GO:0000902	GO:BP	cell morphogenesis
ExN	3.24349e-08	1177	449	68	GO:0032989	GO:BP	cellular component morphogenesis
InN	4.83235e-08	1688	28	17	GO:0002682	GO:BP	regulation of immune system process
ExN	6.49168e-08	691	449	48	GO:0048858	GO:BP	cell projection morphogenesis
ExN	8.01681e-08	673	449	47	GO:0048812	GO:BP	neuron projection morphogenesis
ExN	1.10729e-07	1409	449	75	GO:0030182	GO:BP	neuron differentiation
ExN	1.33906e-07	687	449	47	GO:0120039	GO:BP	plasma membrane bounded cell projection morphogenesis
ExN	1.33906e-07	711	449	48	GO:0032990	GO:BP	cell part morphogenesis
ExN	1.35346e-07	1146	449	65	GO:0048666	GO:BP	neuron development
ExN	1.40799e-07	1327	470	70	GO:0030054	GO:CC	cell junction
ExN	1.68462e-07	694	449	47	GO:0120035	GO:BP	regulation of plasma membrane bounded cell projection organization
ExN	1.70438e-07	228	449	25	GO:0050807	GO:BP	regulation of synapse organization
ExN	2.06828e-07	104	449	17	GO:0035249	GO:BP	synaptic transmission, glutamatergic
ExN	2.0951e-07	5732	470	202	GO:0071944	GO:CC	cell periphery
ExN	2.0951e-07	286	470	27	GO:0045211	GO:CC	postsynaptic membrane
ExN	2.0951e-07	1376	470	71	GO:0043005	GO:CC	neuron projection
ExN	2.22784e-07	370	470	31	GO:0099572	GO:CC	postsynaptic specialization
ExN	2.33781e-07	372	470	31	GO:0098984	GO:CC	neuron to neuron synapse
ExN	2.35044e-07	704	449	47	GO:0031344	GO:BP	regulation of cell projection organization
ExN	3.85916e-07	70	449	14	GO:0051966	GO:BP	regulation of synaptic transmission, glutamatergic
ExN	3.87648e-07	239	449	25	GO:0050803	GO:BP	regulation of synapse structure or activity
InN	4.03048e-07	1709	28	16	GO:0046903	GO:BP	secretion
InN	4.13084e-07	3235	28	20	GO:0002376	GO:BP	immune system process
InN	4.13084e-07	793	28	12	GO:0045055	GO:BP	regulated exocytosis
ExN	4.28215e-07	508	449	38	GO:0022604	GO:BP	regulation of cell morphogenesis
ExN	4.32904e-07	122	470	17	GO:0099055	GO:CC	integral component of postsynaptic membrane
ExN	4.65461e-07	172	470	20	GO:0099240	GO:CC	intrinsic component of synaptic membrane
ExN	4.65461e-07	344	470	29	GO:0014069	GO:CC	postsynaptic density
ExN	4.95583e-07	2820	449	119	GO:0009653	GO:BP	anatomical structure morphogenesis
ExN	5.35253e-07	348	470	29	GO:0032279	GO:CC	asymmetric synapse
ExN	5.35253e-07	5604	470	196	GO:0005886	GO:CC	plasma membrane
ExN	5.74192e-07	159	470	19	GO:0099699	GO:CC	integral component of synaptic membrane
InN	5.76945e-07	1567	28	15	GO:0032940	GO:BP	secretion by cell
ExN	6.32711e-07	128	470	17	GO:0098936	GO:CC	intrinsic component of postsynaptic membrane
ExN	6.53145e-07	684	449	45	GO:0045664	GO:BP	regulation of neuron differentiation
ExN	6.53145e-07	519	449	38	GO:0010975	GO:BP	regulation of neuron projection development
ExN	6.53145e-07	963	449	56	GO:0051960	GO:BP	regulation of nervous system development
ExN	6.53145e-07	1574	449	78	GO:0048699	GO:BP	generation of neurons
ExN	6.54002e-07	1017	449	58	GO:0031175	GO:BP	neuron projection development
InN	7.37388e-07	1616	28	15	GO:0140352	GO:BP	export from cell
ExN	7.63504e-07	1699	449	82	GO:0007267	GO:BP	cell-cell signaling
InN	9.09415e-07	907	28	12	GO:0006887	GO:BP	exocytosis
InN	9.09415e-07	532	28	10	GO:0043299	GO:BP	leukocyte degranulation
ExN	9.41512e-07	769	449	48	GO:0000904	GO:BP	cell morphogenesis involved in differentiation
ExN	9.74409e-07	623	449	42	GO:0044057	GO:BP	regulation of system process
Oligo	1.331e-06	254	34	9	GO:0006813	GO:BP	potassium ion transport
ExN	1.33501e-06	76	470	13	GO:0098982	GO:CC	GABA-ergic synapse
InN	1.36639e-06	45	28	5	GO:0043303	GO:BP	mast cell degranulation
InN	1.36639e-06	1199	28	13	GO:0002684	GO:BP	positive regulation of immune system process
InN	1.39217e-06	46	28	5	GO:0002279	GO:BP	mast cell activation involved in immune response
InN	1.42655e-06	47	28	5	GO:0002448	GO:BP	mast cell mediated immunity
ExN	1.65724e-06	611	449	41	GO:0048667	GO:BP	cell morphogenesis involved in neuron differentiation
InN	2.30067e-06	1281	28	13	GO:0002252	GO:BP	immune effector process
ExN	2.48403e-06	1700	470	78	GO:0031226	GO:CC	intrinsic component of plasma membrane
ExN	3.05424e-06	553	449	38	GO:0008015	GO:BP	blood circulation
ExN	3.4004e-06	1624	470	75	GO:0005887	GO:CC	integral component of plasma membrane
ExN	3.43859e-06	856	449	50	GO:0050767	GO:BP	regulation of neurogenesis
InN	3.60973e-06	58	28	5	GO:0045576	GO:BP	mast cell activation
InN	3.6176e-06	657	28	10	GO:0002274	GO:BP	myeloid leukocyte activation
InN	3.7799e-06	2294	28	16	GO:0006955	GO:BP	immune response
InN	4.04371e-06	880	28	11	GO:0002443	GO:BP	leukocyte mediated immunity
ExN	4.6333e-06	863	470	48	GO:0036477	GO:CC	somatodendritic compartment
ExN	4.66122e-06	563	449	38	GO:0003013	GO:BP	circulatory system process
ExN	5.4562e-06	1031	449	56	GO:0007417	GO:BP	central nervous system development
Oligo	5.58725e-06	91	36	6	GO:0005249	GO:MF	voltage-gated potassium channel activity
ExN	5.62122e-06	150	449	18	GO:0048813	GO:BP	dendrite morphogenesis
InN	5.77743e-06	708	28	10	GO:0002263	GO:BP	cell activation involved in immune response
InN	5.77743e-06	704	28	10	GO:0002366	GO:BP	leukocyte activation involved in immune response
InN	6.90971e-06	1465	28	13	GO:0001775	GO:BP	cell activation
InN	6.90971e-06	72	28	5	GO:0032418	GO:BP	lysosome localization
InN	6.90971e-06	542	28	9	GO:0002275	GO:BP	myeloid cell activation involved in immune response
InN	7.2878e-06	549	28	9	GO:0002444	GO:BP	myeloid leukocyte mediated immunity
ExN	7.84793e-06	481	449	34	GO:0043087	GO:BP	regulation of GTPase activity
ExN	8.21476e-06	991	449	54	GO:0060284	GO:BP	regulation of cell development
ExN	9.34433e-06	173	449	19	GO:0099173	GO:BP	postsynapse organization
ExN	9.4514e-06	622	470	38	GO:0030425	GO:CC	dendrite
ExN	9.61725e-06	157	470	17	GO:0042734	GO:CC	presynaptic membrane
ExN	9.61725e-06	624	470	38	GO:0097447	GO:CC	dendritic tree
ExN	9.725e-06	4156	449	153	GO:0065008	GO:BP	regulation of biological quality
InN	1.1322e-05	780	28	10	GO:0006954	GO:BP	inflammatory response
InN	1.38158e-05	33	28	4	GO:0050869	GO:BP	negative regulation of B cell activation
InN	1.51787e-05	1305	28	12	GO:0045321	GO:BP	leukocyte activation
ExN	1.53335e-05	3356	449	129	GO:0051239	GO:BP	regulation of multicellular organismal process
ExN	1.59018e-05	276	449	24	GO:0006836	GO:BP	neurotransmitter transport
Oligo	1.9639e-05	126	36	6	GO:0005267	GO:MF	potassium channel activity
ExN	2.04903e-05	1723	449	78	GO:0006811	GO:BP	ion transport
InN	2.51289e-05	187	28	6	GO:0002695	GO:BP	negative regulation of leukocyte activation
Oligo	2.53773e-05	711	34	11	GO:0043269	GO:BP	regulation of ion transport
Oligo	2.53773e-05	547	34	10	GO:0015672	GO:BP	monovalent inorganic cation transport
InN	2.64353e-05	40	28	4	GO:0033003	GO:BP	regulation of mast cell activation
InN	2.64353e-05	1116	28	11	GO:0050776	GO:BP	regulation of immune response
ExN	2.93705e-05	5020	449	175	GO:0048731	GO:BP	system development
Oligo	3.26076e-05	147	36	6	GO:0022843	GO:MF	voltage-gated cation channel activity
InN	3.56826e-05	492	28	8	GO:0002683	GO:BP	negative regulation of immune system process
ExN	3.6024e-05	1184	449	59	GO:0034220	GO:BP	ion transmembrane transport
ExN	3.61331e-05	311	449	25	GO:0010769	GO:BP	regulation of cell morphogenesis involved in differentiation
ExN	4.10886e-05	1634	449	74	GO:0055085	GO:BP	transmembrane transport
InN	4.24678e-05	12	28	3	GO:0033004	GO:BP	negative regulation of mast cell activation
InN	4.24678e-05	210	28	6	GO:0050866	GO:BP	negative regulation of cell activation
Oligo	4.48915e-05	163	36	6	GO:0015079	GO:MF	potassium ion transmembrane transporter activity
ExN	4.77893e-05	3638	449	135	GO:0010646	GO:BP	regulation of cell communication
ExN	5.10136e-05	756	449	43	GO:0007420	GO:BP	brain development
ExN	5.10136e-05	3679	449	136	GO:0023051	GO:BP	regulation of signaling
ExN	5.49306e-05	142	449	16	GO:0035296	GO:BP	regulation of tube diameter
ExN	5.49306e-05	142	449	16	GO:0097746	GO:BP	regulation of blood vessel diameter
ExN	5.7798e-05	647	470	37	GO:0030424	GO:CC	axon
ExN	5.94251e-05	143	449	16	GO:0035150	GO:BP	regulation of tube size
Oligo	7.09988e-05	222	34	7	GO:0071805	GO:BP	potassium ion transmembrane transport
InN	7.33085e-05	53	28	4	GO:0002886	GO:BP	regulation of myeloid leukocyte mediated immunity
ExN	7.65988e-05	112	449	14	GO:0006939	GO:BP	smooth muscle contraction
ExN	7.96789e-05	442	449	30	GO:0042391	GO:BP	regulation of membrane potential
Oligo	8.90522e-05	302	36	7	GO:0034702	GO:CC	ion channel complex
Oligo	8.90522e-05	89	36	5	GO:0008076	GO:CC	voltage-gated potassium channel complex
Oligo	8.90522e-05	100	36	5	GO:0034705	GO:CC	potassium channel complex
ExN	9.14831e-05	129	470	14	GO:0099634	GO:CC	postsynaptic specialization membrane
ExN	9.93456e-05	520	449	33	GO:0090066	GO:BP	regulation of anatomical structure size
Oligo	0.000100183	332	36	7	GO:1990351	GO:CC	transporter complex
Oligo	0.000100183	324	36	7	GO:1902495	GO:CC	transmembrane transporter complex
Oligo	0.000107452	203	36	6	GO:0022832	GO:MF	voltage-gated channel activity
Oligo	0.000107452	202	36	6	GO:0005244	GO:MF	voltage-gated ion channel activity
InN	0.000112999	2	28	2	GO:0001812	GO:BP	positive regulation of type I hypersensitivity
InN	0.000112999	17	28	3	GO:0030889	GO:BP	negative regulation of B cell proliferation
InN	0.000112999	2	28	2	GO:0001805	GO:BP	positive regulation of type III hypersensitivity
InN	0.000112999	2	28	2	GO:0001803	GO:BP	regulation of type III hypersensitivity
InN	0.000112999	2	28	2	GO:0001802	GO:BP	type III hypersensitivity
ExN	0.000113931	1205	449	58	GO:0006812	GO:BP	cation transport
ExN	0.000117891	575	449	35	GO:0030031	GO:BP	cell projection assembly
InN	0.000118618	598	28	8	GO:0002694	GO:BP	regulation of leukocyte activation
Oligo	0.000122836	225	36	6	GO:0034703	GO:CC	cation channel complex
ExN	0.000127657	406	449	28	GO:0043547	GO:BP	positive regulation of GTPase activity
ExN	0.000127912	360	449	26	GO:0001505	GO:BP	regulation of neurotransmitter levels
ExN	0.000128602	86	449	12	GO:0097756	GO:BP	negative regulation of blood vessel diameter
ExN	0.000145474	253	449	21	GO:0016358	GO:BP	dendrite development
Oligo	0.000159762	348	36	7	GO:0022836	GO:MF	gated channel activity
ExN	0.000162052	2942	449	112	GO:0032879	GO:BP	regulation of localization
ExN	0.000175508	562	449	34	GO:0120031	GO:BP	plasma membrane bounded cell projection assembly
ExN	0.000182074	801	449	43	GO:0060322	GO:BP	head development
InN	0.000188831	641	28	8	GO:0050865	GO:BP	regulation of cell activation
InN	0.000188831	640	28	8	GO:0032103	GO:BP	positive regulation of response to external stimulus
InN	0.000199232	451	28	7	GO:0002697	GO:BP	regulation of immune effector process
ExN	0.000233492	180	449	17	GO:0007416	GO:BP	synapse assembly
ExN	0.000233492	1947	449	81	GO:0051049	GO:BP	regulation of transport
ExN	0.000237957	531	470	31	GO:0098793	GO:CC	presynapse
ExN	0.000247088	399	449	27	GO:0030900	GO:BP	forebrain development
InN	0.000257447	1783	28	12	GO:0006952	GO:BP	defense response
InN	0.000262642	916	28	9	GO:0030097	GO:BP	hemopoiesis
InN	0.000262642	2146	28	13	GO:0016192	GO:BP	vesicle-mediated transport
InN	0.000262642	3	28	2	GO:0016068	GO:BP	type I hypersensitivity
InN	0.000262642	80	28	4	GO:0050672	GO:BP	negative regulation of lymphocyte proliferation
InN	0.000262642	3	28	2	GO:0001810	GO:BP	regulation of type I hypersensitivity
InN	0.000262642	2923	28	15	GO:0009605	GO:BP	response to external stimulus
InN	0.000266763	81	28	4	GO:0032945	GO:BP	negative regulation of mononuclear cell proliferation
ExN	0.00027265	78	449	11	GO:0042310	GO:BP	vasoconstriction
ExN	0.00027265	3393	449	124	GO:0006793	GO:BP	phosphorus metabolic process
ExN	0.00027265	475	449	30	GO:0023061	GO:BP	signal release
ExN	0.00027265	145	449	15	GO:0051588	GO:BP	regulation of neurotransmitter transport
InN	0.000278832	489	28	7	GO:1903706	GO:BP	regulation of hemopoiesis
ExN	0.000306069	1194	449	56	GO:0022603	GO:BP	regulation of anatomical structure morphogenesis
ExN	0.000306069	1194	449	56	GO:0072359	GO:BP	circulatory system development
InN	0.000320676	86	28	4	GO:0070664	GO:BP	negative regulation of leukocyte proliferation
InN	0.000320676	956	28	9	GO:0048534	GO:BP	hematopoietic or lymphoid organ development
ExN	0.000381483	89	226	13	KEGG:04970	KEGG	Salivary secretion
InN	0.000393389	195	28	5	GO:0002703	GO:BP	regulation of leukocyte mediated immunity
InN	0.000403144	29	28	3	GO:0043304	GO:BP	regulation of mast cell degranulation
ExN	0.000421676	77	470	10	GO:0099060	GO:CC	integral component of postsynaptic specialization membrane
ExN	0.000436953	190	449	17	GO:0050770	GO:BP	regulation of axonogenesis
InN	0.000439478	30	28	3	GO:0033006	GO:BP	regulation of mast cell activation involved in immune response
Astro	0.000441223	21	16	3	GO:0060252	GO:BP	positive regulation of glial cell proliferation
Astro	0.000441223	83	16	4	GO:0048708	GO:BP	astrocyte differentiation
Astro	0.000441223	79	16	4	GO:0014015	GO:BP	positive regulation of gliogenesis
InN	0.000452674	1009	28	9	GO:0002520	GO:BP	immune system development
InN	0.000452674	96	28	4	GO:0042100	GO:BP	B cell proliferation
Oligo	0.000458031	442	34	8	GO:0042391	GO:BP	regulation of membrane potential
ExN	0.000477234	20	449	6	GO:0031290	GO:BP	retinal ganglion cell axon guidance
InN	0.000508533	32	28	3	GO:0002675	GO:BP	positive regulation of acute inflammatory response
InN	0.000514061	362	28	6	GO:0002460	GO:BP	adaptive immune response based on somatic recombination of immune receptors built from immunoglobulin superfamily domains
ExN	0.000563012	302	449	22	GO:1903522	GO:BP	regulation of blood circulation
ExN	0.000563012	101	449	12	GO:0007215	GO:BP	glutamate receptor signaling pathway
ExN	0.000563012	6105	449	197	GO:0048856	GO:BP	anatomical structure development
ExN	0.000577772	175	449	16	GO:0003018	GO:BP	vascular process in circulatory system
ExN	0.000577772	1466	449	64	GO:0043085	GO:BP	positive regulation of catalytic activity
ExN	0.000620685	81	470	10	GO:0098948	GO:CC	intrinsic component of postsynaptic specialization membrane
ExN	0.000620685	307	470	21	GO:0150034	GO:CC	distal axon
Oligo	0.000628559	113	34	5	GO:0043266	GO:BP	regulation of potassium ion transport
Oligo	0.000641783	647	36	8	GO:0030424	GO:CC	axon
Oligo	0.000680503	444	36	7	GO:0005216	GO:MF	ion channel activity
Oligo	0.000680607	492	34	8	GO:0034765	GO:BP	regulation of ion transmembrane transport
Oligo	0.000680607	871	34	10	GO:0098660	GO:BP	inorganic ion transmembrane transport
InN	0.000698066	5	28	2	GO:0032763	GO:BP	regulation of mast cell cytokine production
InN	0.000698066	109	28	4	GO:0007229	GO:BP	integrin-mediated signaling pathway
ExN	0.000727653	5604	449	183	GO:0007275	GO:BP	multicellular organism development
ExN	0.00075426	3367	449	121	GO:0006796	GO:BP	phosphate-containing compound metabolic process
ExN	0.000761525	264	449	20	GO:0021537	GO:BP	telencephalon development
ExN	0.000796916	774	449	40	GO:0051345	GO:BP	positive regulation of hydrolase activity
ExN	0.000828527	84	470	10	GO:0098889	GO:CC	intrinsic component of presynaptic membrane
ExN	0.000857841	106	449	12	GO:0099175	GO:BP	regulation of postsynapse organization
ExN	0.000887784	2227	449	87	GO:0003008	GO:BP	system process
ExN	0.00092579	922	449	45	GO:0030001	GO:BP	metal ion transport
Oligo	0.000982425	486	36	7	GO:0015267	GO:MF	channel activity
Oligo	0.000982425	487	36	7	GO:0022803	GO:MF	passive transmembrane transporter activity
ExN	0.000985426	487	449	29	GO:0007409	GO:BP	axonogenesis
InN	0.000987084	6	28	2	GO:0043305	GO:BP	negative regulation of mast cell degranulation
InN	0.000987084	6	28	2	GO:0002885	GO:BP	positive regulation of hypersensitivity
InN	0.000987084	1757	28	11	GO:0010941	GO:BP	regulation of cell death
Oligo	0.00100488	922	34	10	GO:0030001	GO:BP	metal ion transport
ExN	0.00103856	11634	470	330	GO:0005737	GO:CC	cytoplasm
ExN	0.00104982	34	449	7	GO:0090075	GO:BP	relaxation of muscle
InN	0.00106359	419	28	6	GO:0051656	GO:BP	establishment of organelle localization
ExN	0.00107144	55	470	8	GO:0045178	GO:CC	basal part of cell
ExN	0.00108147	2541	449	96	GO:0051128	GO:BP	regulation of cellular component organization
ExN	0.00109193	2779	449	103	GO:0050793	GO:BP	regulation of developmental process
ExN	0.00112879	61	449	9	GO:0060997	GO:BP	dendritic spine morphogenesis
ExN	0.00114107	147	449	14	GO:0060078	GO:BP	regulation of postsynaptic membrane potential
ExN	0.00114107	110	449	12	GO:0046928	GO:BP	regulation of neurotransmitter secretion
InN	0.0011808	44	28	3	GO:0043300	GO:BP	regulation of leukocyte degranulation
ExN	0.00118267	6798	449	213	GO:0007154	GO:BP	cell communication
ExN	0.0012414	62	449	9	GO:0046847	GO:BP	filopodium assembly
ExN	0.00124282	187	470	15	GO:0030426	GO:CC	growth cone
Oligo	0.00126797	349	36	6	GO:0005261	GO:MF	cation channel activity
ExN	0.00126863	395	449	25	GO:0031346	GO:BP	positive regulation of cell projection organization
ExN	0.00131415	6772	449	212	GO:0023052	GO:BP	signaling
InN	0.00131967	7	28	2	GO:0032762	GO:BP	mast cell cytokine production
ExN	0.00134633	8	449	4	GO:0061669	GO:BP	spontaneous neurotransmitter secretion
Oligo	0.00141998	1205	34	11	GO:0006812	GO:BP	cation transport
InN	0.00144215	4421	28	17	GO:0048583	GO:BP	regulation of response to stimulus
InN	0.00144911	48	28	3	GO:0002704	GO:BP	negative regulation of leukocyte mediated immunity
InN	0.00144911	48	28	3	GO:0002673	GO:BP	regulation of acute inflammatory response
Astro	0.00150112	132	16	4	GO:0014013	GO:BP	regulation of gliogenesis
Astro	0.00150112	302	16	5	GO:0070372	GO:BP	regulation of ERK1 and ERK2 cascade
Astro	0.00150112	39	16	3	GO:0060251	GO:BP	regulation of glial cell proliferation
Oligo	0.0015278	582	34	8	GO:0034762	GO:BP	regulation of transmembrane transport
Oligo	0.0015278	781	34	9	GO:0098662	GO:BP	inorganic cation transmembrane transport
ExN	0.00157013	214	449	17	GO:0007623	GO:BP	circadian rhythm
InN	0.00159379	8	28	2	GO:0002866	GO:BP	positive regulation of acute inflammatory response to antigenic stimulus
InN	0.00159379	8	28	2	GO:0033007	GO:BP	negative regulation of mast cell activation involved in immune response
InN	0.00159379	4996	28	18	GO:0048523	GO:BP	negative regulation of cellular process
InN	0.00159379	677	28	7	GO:0002250	GO:BP	adaptive immune response
Astro	0.00163484	321	16	5	GO:0070371	GO:BP	ERK1 and ERK2 cascade
InN	0.00164212	283	28	5	GO:1902105	GO:BP	regulation of leukocyte differentiation
InN	0.00164212	283	28	5	GO:0046651	GO:BP	lymphocyte proliferation
ExN	0.00166922	75	470	9	GO:0099056	GO:CC	integral component of presynaptic membrane
InN	0.00168302	286	28	5	GO:0032943	GO:BP	mononuclear cell proliferation
InN	0.00168302	470	28	6	GO:0002429	GO:BP	immune response-activating cell surface receptor signaling pathway
InN	0.00171142	53	28	3	GO:0002889	GO:BP	regulation of immunoglobulin mediated immune response
InN	0.00171142	53	28	3	GO:0002712	GO:BP	regulation of B cell mediated immunity
Astro	0.00174237	45	16	3	GO:0014002	GO:BP	astrocyte development
InN	0.00176657	54	28	3	GO:0001774	GO:BP	microglial cell activation
InN	0.00176657	54	28	3	GO:0002269	GO:BP	leukocyte activation involved in inflammatory response
ExN	0.00177906	4335	449	146	GO:0030154	GO:BP	cell differentiation
ExN	0.00182642	781	449	39	GO:0030029	GO:BP	actin filament-based process
ExN	0.00182642	615	449	33	GO:0007610	GO:BP	behavior
ExN	0.00182642	175	449	15	GO:0007269	GO:BP	neurotransmitter secretion
ExN	0.00182642	175	449	15	GO:0099643	GO:BP	signal release from synapse
InN	0.00182784	9	28	2	GO:0002883	GO:BP	regulation of hypersensitivity
InN	0.0018395	484	28	6	GO:0043312	GO:BP	neutrophil degranulation
InN	0.00187208	487	28	6	GO:0002283	GO:BP	neutrophil activation involved in immune response
InN	0.00187208	153	28	4	GO:0050729	GO:BP	positive regulation of inflammatory response
ExN	0.00188955	195	470	15	GO:0030427	GO:CC	site of polarized growth
InN	0.00191224	155	28	4	GO:0051250	GO:BP	negative regulation of lymphocyte activation
InN	0.00191224	721	28	7	GO:0002253	GO:BP	activation of immune response
InN	0.00191224	1605	28	10	GO:0042981	GO:BP	regulation of apoptotic process
ExN	0.00192294	2252	449	86	GO:0006928	GO:BP	movement of cell or subcellular component
InN	0.00196713	498	28	6	GO:0002446	GO:BP	neutrophil mediated immunity
InN	0.00196713	498	28	6	GO:0042119	GO:BP	neutrophil activation
InN	0.00196713	498	28	6	GO:0050900	GO:BP	leukocyte migration
ExN	0.00200414	4531	449	151	GO:0048869	GO:BP	cellular developmental process
InN	0.0020241	10	28	2	GO:0002887	GO:BP	negative regulation of myeloid leukocyte mediated immunity
InN	0.0020241	503	28	6	GO:0002768	GO:BP	immune response-regulating cell surface receptor signaling pathway
InN	0.0020241	310	28	5	GO:0070661	GO:BP	leukocyte proliferation
ExN	0.0020297	118	449	12	GO:0098693	GO:BP	regulation of synaptic vesicle cycle
InN	0.00203212	1633	28	10	GO:0043067	GO:BP	regulation of programmed cell death
InN	0.00203212	505	28	6	GO:0036230	GO:BP	granulocyte activation
InN	0.00206268	509	28	6	GO:0031349	GO:BP	positive regulation of defense response
InN	0.00206268	1010	28	8	GO:0045087	GO:BP	innate immune response
ExN	0.00206488	288	449	20	GO:0060047	GO:BP	heart contraction
InN	0.00214947	6366	28	20	GO:0048518	GO:BP	positive regulation of biological process
ExN	0.00216372	417	470	24	GO:0031252	GO:CC	cell leading edge
InN	0.00217357	62	28	3	GO:0030888	GO:BP	regulation of B cell proliferation
Oligo	0.00223631	393	36	6	GO:0015077	GO:MF	monovalent inorganic cation transmembrane transporter activity
InN	0.00225115	11	28	2	GO:0002524	GO:BP	hypersensitivity
InN	0.00225115	322	28	5	GO:0042113	GO:BP	B cell activation
ExN	0.00226219	17	449	5	GO:0055119	GO:BP	relaxation of cardiac muscle
ExN	0.0022667	222	449	17	GO:0099003	GO:BP	vesicle-mediated transport in synapse
InN	0.00232122	64	28	3	GO:0061900	GO:BP	glial cell activation
InN	0.00232126	764	28	7	GO:0001817	GO:BP	regulation of cytokine production
ExN	0.00232137	388	449	24	GO:0045666	GO:BP	positive regulation of neuron differentiation
InN	0.00232785	2038	28	11	GO:0008283	GO:BP	cell population proliferation
ExN	0.00235735	2168	466	88	GO:1901265	GO:MF	nucleoside phosphate binding
ExN	0.00235735	2841	466	111	GO:0043168	GO:MF	anion binding
ExN	0.00235735	824	466	43	GO:0016301	GO:MF	kinase activity
ExN	0.00235735	2167	466	88	GO:0000166	GO:MF	nucleotide binding
InN	0.00240769	531	28	6	GO:0002521	GO:BP	leukocyte differentiation
InN	0.0024672	775	28	7	GO:0008285	GO:BP	negative regulation of cell population proliferation
InN	0.00252857	12	28	2	GO:0043301	GO:BP	negative regulation of leukocyte degranulation
InN	0.00252857	12	28	2	GO:0002863	GO:BP	positive regulation of inflammatory response to antigenic stimulus
ExN	0.00253217	711	449	36	GO:0043269	GO:BP	regulation of ion transport
ExN	0.00262967	28	449	6	GO:0099560	GO:BP	synaptic membrane adhesion
ExN	0.00262967	342	449	22	GO:0051056	GO:BP	regulation of small GTPase mediated signal transduction
InN	0.00268897	5337	28	18	GO:0006810	GO:BP	transport
ExN	0.00282112	6630	449	206	GO:0032502	GO:BP	developmental process
ExN	0.00282112	4	449	3	GO:0097118	GO:BP	neuroligin clustering involved in postsynaptic membrane assembly
ExN	0.0028573	9731	470	281	GO:0016020	GO:CC	membrane
ExN	0.00288949	1822	449	72	GO:0044093	GO:BP	positive regulation of molecular function
ExN	0.00288949	446	449	26	GO:0019932	GO:BP	second-messenger-mediated signaling
InN	0.00291048	3356	28	14	GO:0051239	GO:BP	regulation of multicellular organismal process
InN	0.00295935	557	28	6	GO:0051051	GO:BP	negative regulation of transport
Astro	0.00300743	56	16	3	GO:0014009	GO:BP	glial cell proliferation
ExN	0.00303596	298	449	20	GO:0003015	GO:BP	heart process
InN	0.00316547	2942	28	13	GO:0032879	GO:BP	regulation of localization
ExN	0.00320334	10	449	4	GO:0098722	GO:BP	asymmetric stem cell division
ExN	0.00320334	165	449	14	GO:0050806	GO:BP	positive regulation of synaptic transmission
InN	0.00330118	14	28	2	GO:0002864	GO:BP	regulation of acute inflammatory response to antigenic stimulus
InN	0.00330118	359	28	5	GO:0002449	GO:BP	lymphocyte mediated immunity
InN	0.0033076	1770	28	10	GO:0065003	GO:BP	protein-containing complex assembly
InN	0.00330997	2542	28	12	GO:0048584	GO:BP	positive regulation of response to stimulus
InN	0.00331942	193	28	4	GO:0050864	GO:BP	regulation of B cell activation
InN	0.00335769	194	28	4	GO:1903708	GO:BP	positive regulation of hemopoiesis
ExN	0.00335859	107	449	11	GO:0051963	GO:BP	regulation of synapse assembly
ExN	0.00335859	1480	449	61	GO:0071495	GO:BP	cellular response to endogenous stimulus
ExN	0.00335859	531	449	29	GO:0061564	GO:BP	axon development
ExN	0.00335859	1932	449	75	GO:0045595	GO:BP	regulation of cell differentiation
InN	0.0034033	5460	28	18	GO:0051234	GO:BP	establishment of localization
ExN	0.00347482	102	470	10	GO:0098839	GO:CC	postsynaptic density membrane
Oligo	0.00350479	1624	36	11	GO:0005887	GO:CC	integral component of plasma membrane
Oligo	0.00351161	1362	36	10	GO:0045202	GO:CC	synapse
InN	0.00351724	837	28	7	GO:0001816	GO:BP	cytokine production
ExN	0.00356212	90	449	10	GO:0106027	GO:BP	neuron projection organization
ExN	0.00356212	279	449	19	GO:0045927	GO:BP	positive regulation of growth
InN	0.00359055	15	28	2	GO:0002467	GO:BP	germinal center formation
InN	0.0036078	1132	28	8	GO:0032101	GO:BP	regulation of response to external stimulus
InN	0.00369973	374	28	5	GO:0018108	GO:BP	peptidyl-tyrosine phosphorylation
ExN	0.0037288	304	449	20	GO:0048511	GO:BP	rhythmic process
InN	0.00380868	377	28	5	GO:0018212	GO:BP	peptidyl-tyrosine modification
InN	0.00382001	855	28	7	GO:0051046	GO:BP	regulation of secretion
InN	0.00382001	6105	28	19	GO:0048856	GO:BP	anatomical structure development
InN	0.00382001	81	28	3	GO:0150076	GO:BP	neuroinflammatory response
ExN	0.00382458	563	449	30	GO:0051962	GO:BP	positive regulation of nervous system development
Oligo	0.00382504	154	36	4	GO:0043204	GO:CC	perikaryon
Oligo	0.00382504	1700	36	11	GO:0031226	GO:CC	intrinsic component of plasma membrane
InN	0.00397214	207	28	4	GO:0002699	GO:BP	positive regulation of immune effector process
ExN	0.00399969	2574	466	99	GO:0036094	GO:MF	small molecule binding
Oligo	0.00402701	194	34	5	GO:0060359	GO:BP	response to ammonium ion
Oligo	0.00404637	900	34	9	GO:0098655	GO:BP	cation transmembrane transport
Oligo	0.0041068	446	36	6	GO:0046873	GO:MF	metal ion transmembrane transporter activity
ExN	0.00411152	37	470	6	GO:0009925	GO:CC	basal plasma membrane
ExN	0.00420433	105	470	10	GO:0030175	GO:CC	filopodium
ExN	0.00424372	594	449	31	GO:0007507	GO:BP	heart development
InN	0.00424765	1853	28	10	GO:0051240	GO:BP	positive regulation of multicellular organismal process
InN	0.00424765	3072	28	13	GO:0051704	GO:BP	multi-organism process
InN	0.00424765	85	28	3	GO:2000106	GO:BP	regulation of leukocyte apoptotic process
InN	0.00426342	17	28	2	GO:2000010	GO:BP	positive regulation of protein localization to cell surface
InN	0.00427661	86	28	3	GO:0002718	GO:BP	regulation of cytokine production involved in immune response
InN	0.00427661	393	28	5	GO:0002833	GO:BP	positive regulation of response to biotic stimulus
InN	0.0043377	5605	28	18	GO:0048522	GO:BP	positive regulation of cellular process
InN	0.00446743	398	28	5	GO:0050727	GO:BP	regulation of inflammatory response
ExN	0.00447956	261	449	18	GO:0030072	GO:BP	peptide hormone secretion
ExN	0.00447956	624	449	32	GO:0071407	GO:BP	cellular response to organic cyclic compound
ExN	0.00449356	11	449	4	GO:0098814	GO:BP	spontaneous synaptic transmission
ExN	0.00453359	1758	449	69	GO:0009719	GO:BP	response to endogenous stimulus
ExN	0.00453359	172	449	14	GO:0030307	GO:BP	positive regulation of cell growth
InN	0.00455954	892	28	7	GO:0050778	GO:BP	positive regulation of immune response
InN	0.00457169	219	28	4	GO:0050670	GO:BP	regulation of lymphocyte proliferation
ExN	0.00458558	53	470	7	GO:0099061	GO:CC	integral component of postsynaptic density membrane
ExN	0.0046456	785	470	36	GO:0070161	GO:CC	anchoring junction
ExN	0.00468647	60	449	8	GO:0019229	GO:BP	regulation of vasoconstriction
ExN	0.00468647	6889	449	211	GO:0051179	GO:BP	localization
InN	0.00469869	221	28	4	GO:0032944	GO:BP	regulation of mononuclear cell proliferation
InN	0.00481471	91	28	3	GO:0046427	GO:BP	positive regulation of receptor signaling pathway via JAK-STAT
InN	0.00481471	2285	28	11	GO:0008219	GO:BP	cell death
InN	0.00487554	639	28	6	GO:0002757	GO:BP	immune response-activating signal transduction
InN	0.0048803	19	28	2	GO:2000251	GO:BP	positive regulation of actin cytoskeleton reorganization
InN	0.0048803	5681	28	18	GO:0048519	GO:BP	negative regulation of biological process
InN	0.0048803	1212	28	8	GO:0098542	GO:BP	defense response to other organism
InN	0.00489036	227	28	4	GO:0016064	GO:BP	immunoglobulin mediated immune response
InN	0.00489036	1551	28	9	GO:0051707	GO:BP	response to other organism
InN	0.00489036	643	28	6	GO:0051640	GO:BP	organelle localization
InN	0.00490416	1553	28	9	GO:0043207	GO:BP	response to external biotic stimulus
InN	0.00496677	94	28	3	GO:1904894	GO:BP	positive regulation of receptor signaling pathway via STAT
ExN	0.004981	77	449	9	GO:1903524	GO:BP	positive regulation of blood circulation
ExN	0.004981	153	449	13	GO:0006865	GO:BP	amino acid transport
Oligo	0.00499348	1723	34	12	GO:0006811	GO:BP	ion transport
Oligo	0.00499348	1184	34	10	GO:0034220	GO:BP	ion transmembrane transport
ExN	0.00501628	273	466	20	GO:0005096	GO:MF	GTPase activator activity
InN	0.00503916	230	28	4	GO:0019724	GO:BP	B cell mediated immunity
ExN	0.00510058	744	449	36	GO:0007169	GO:BP	transmembrane receptor protein tyrosine kinase signaling pathway
InN	0.00517315	232	28	4	GO:1903531	GO:BP	negative regulation of secretion by cell
InN	0.00530406	3197	28	13	GO:0007166	GO:BP	cell surface receptor signaling pathway
InN	0.00530406	1583	28	9	GO:0009607	GO:BP	response to biotic stimulus
InN	0.00530406	1947	28	10	GO:0051049	GO:BP	regulation of transport
InN	0.00530406	97	28	3	GO:0045639	GO:BP	positive regulation of myeloid cell differentiation
InN	0.00530406	234	28	4	GO:0070663	GO:BP	regulation of leukocyte proliferation
InN	0.00530406	4147	28	15	GO:0006950	GO:BP	response to stress
InN	0.00530406	98	28	3	GO:0050764	GO:BP	regulation of phagocytosis
Astro	0.00530712	756	16	6	GO:0043408	GO:BP	regulation of MAPK cascade
ExN	0.00532565	109	470	10	GO:0044853	GO:CC	plasma membrane raft
ExN	0.00540159	173	470	13	GO:0043197	GO:CC	dendritic spine
Astro	0.00556775	3679	16	11	GO:0023051	GO:BP	regulation of signaling
Astro	0.00556775	226	16	4	GO:0010001	GO:BP	glial cell differentiation
Astro	0.00556775	3638	16	11	GO:0010646	GO:BP	regulation of cell communication
ExN	0.00558134	198	449	15	GO:0021953	GO:BP	central nervous system neuron differentiation
InN	0.00571465	673	28	6	GO:0002764	GO:BP	immune response-regulating signaling pathway
ExN	0.00584416	175	470	13	GO:0044309	GO:CC	neuron spine
ExN	0.00584416	198	470	14	GO:0030027	GO:CC	lamellipodium
InN	0.00588591	102	28	3	GO:0042116	GO:BP	macrophage activation
InN	0.00595419	440	28	5	GO:0051090	GO:BP	regulation of DNA-binding transcription factor activity
ExN	0.00596585	693	449	34	GO:0040008	GO:BP	regulation of growth
ExN	0.00599947	293	449	19	GO:0010976	GO:BP	positive regulation of neuron projection development
ExN	0.00599947	2210	449	82	GO:2000026	GO:BP	regulation of multicellular organismal development
InN	0.00632887	105	28	3	GO:0002367	GO:BP	cytokine production involved in immune response
ExN	0.00637111	57	470	7	GO:0099146	GO:CC	intrinsic component of postsynaptic density membrane
Oligo	0.00639523	41	34	3	GO:0043267	GO:BP	negative regulation of potassium ion transport
ExN	0.00641516	201	449	15	GO:0099504	GO:BP	synaptic vesicle cycle
InN	0.00648387	2006	28	10	GO:0006915	GO:BP	apoptotic process
ExN	0.00654799	34	449	6	GO:0045907	GO:BP	positive regulation of vasoconstriction
InN	0.00660748	107	28	3	GO:0071887	GO:BP	leukocyte apoptotic process
Astro	0.006648	496	16	5	GO:0050769	GO:BP	positive regulation of neurogenesis
ExN	0.0068051	1853	449	71	GO:0051240	GO:BP	positive regulation of multicellular organismal process
InN	0.00682452	24	28	2	GO:0002438	GO:BP	acute inflammatory response to antigenic stimulus
InN	0.00682452	24	28	2	GO:1903306	GO:BP	negative regulation of regulated secretory pathway
InN	0.00709476	259	28	4	GO:0051048	GO:BP	negative regulation of secretion
Astro	0.00711269	856	16	6	GO:0050767	GO:BP	regulation of neurogenesis
ExN	0.0071363	306	466	21	GO:0030695	GO:MF	GTPase regulator activity
InN	0.00718232	111	28	3	GO:0002526	GO:BP	acute inflammatory response
ExN	0.00728815	1245	449	52	GO:0051130	GO:BP	positive regulation of cellular component organization
Astro	0.00733116	556	16	5	GO:0043410	GO:BP	positive regulation of MAPK cascade
Astro	0.00733116	940	16	6	GO:0000165	GO:BP	MAPK cascade
Astro	0.00733116	16	16	2	GO:0045073	GO:BP	regulation of chemokine biosynthetic process
Astro	0.00733116	20	16	2	GO:0002726	GO:BP	positive regulation of T cell cytokine production
Astro	0.00733116	303	16	4	GO:0050768	GO:BP	negative regulation of neurogenesis
Astro	0.00733116	1340	16	7	GO:0009968	GO:BP	negative regulation of signal transduction
Astro	0.00733116	1454	16	7	GO:0023057	GO:BP	negative regulation of signaling
Astro	0.00733116	1457	16	7	GO:0051094	GO:BP	positive regulation of developmental process
Astro	0.00733116	1450	16	7	GO:0010648	GO:BP	negative regulation of cell communication
Astro	0.00733116	579	16	5	GO:0010720	GO:BP	positive regulation of cell development
Astro	0.00733116	963	16	6	GO:0051960	GO:BP	regulation of nervous system development
Astro	0.00733116	563	16	5	GO:0051962	GO:BP	positive regulation of nervous system development
Astro	0.00733116	19	16	2	GO:0150078	GO:BP	positive regulation of neuroinflammatory response
Astro	0.00733116	310	16	4	GO:0042063	GO:BP	gliogenesis
Astro	0.00733116	991	16	6	GO:0060284	GO:BP	regulation of cell development
Astro	0.00733116	958	16	6	GO:0023014	GO:BP	signal transduction by protein phosphorylation
Astro	0.00733116	17	16	2	GO:0042033	GO:BP	chemokine biosynthetic process
Astro	0.00733116	17	16	2	GO:0050755	GO:BP	chemokine metabolic process
InN	0.00735856	2047	28	10	GO:0043933	GO:BP	protein-containing complex subunit organization
Astro	0.00742724	1022	16	6	GO:0045597	GO:BP	positive regulation of cell differentiation
Astro	0.00742724	1493	16	7	GO:0001932	GO:BP	regulation of protein phosphorylation
Astro	0.00742724	22	16	2	GO:0035743	GO:BP	CD4-positive, alpha-beta T cell cytokine production
Astro	0.00742724	121	16	3	GO:0021782	GO:BP	glial cell development
Astro	0.00742724	21	16	2	GO:0046827	GO:BP	positive regulation of protein export from nucleus
Astro	0.00742724	330	16	4	GO:1903829	GO:BP	positive regulation of cellular protein localization
Astro	0.00742724	324	16	4	GO:0051961	GO:BP	negative regulation of nervous system development
ExN	0.00756424	82	449	9	GO:0097061	GO:BP	dendritic spine organization
InN	0.00761319	470	28	5	GO:0001819	GO:BP	positive regulation of cytokine production
ExN	0.0079934	101	449	10	GO:0060996	GO:BP	dendritic spine development
ExN	0.00817746	180	226	16	KEGG:04360	KEGG	Axon guidance
ExN	0.00817746	148	226	14	KEGG:04723	KEGG	Retrograde endocannabinoid signaling
ExN	0.00833939	679	449	33	GO:0030036	GO:BP	actin cytoskeleton organization
Oligo	0.00846948	1022	34	9	GO:0045597	GO:BP	positive regulation of cell differentiation
ExN	0.00861022	254	449	17	GO:0008016	GO:BP	regulation of heart contraction
ExN	0.00861828	142	449	12	GO:0031644	GO:BP	regulation of nervous system process
InN	0.00877615	1358	28	8	GO:0051241	GO:BP	negative regulation of multicellular organismal process
ExN	0.00877764	122	449	11	GO:0021987	GO:BP	cerebral cortex development
ExN	0.00877764	2480	449	89	GO:0016310	GO:BP	phosphorylation
Astro	0.00879432	36	9	2	KEGG:05332	KEGG	Graft-versus-host disease
Astro	0.00879432	162	9	3	KEGG:04630	KEGG	JAK-STAT signaling pathway
Astro	0.00879432	35	9	2	KEGG:05020	KEGG	Prion diseases
Astro	0.00879432	36	9	2	KEGG:05143	KEGG	African trypanosomiasis
Astro	0.00879432	31	9	2	KEGG:01523	KEGG	Antifolate resistance
Astro	0.00879432	112	9	3	KEGG:04668	KEGG	TNF signaling pathway
InN	0.00891677	28	28	2	GO:0045408	GO:BP	regulation of interleukin-6 biosynthetic process
InN	0.00891677	28	28	2	GO:0061082	GO:BP	myeloid leukocyte cytokine production
InN	0.00891677	121	28	3	GO:0002698	GO:BP	negative regulation of immune effector process
ExN	0.00904948	67	449	8	GO:0006940	GO:BP	regulation of smooth muscle contraction
Astro	0.00907985	350	16	4	GO:0010721	GO:BP	negative regulation of cell development
InN	0.00918947	6630	28	19	GO:0032502	GO:BP	developmental process
InN	0.00919557	751	28	6	GO:0010942	GO:BP	positive regulation of cell death
InN	0.00919557	123	28	3	GO:0042035	GO:BP	regulation of cytokine biosynthetic process
InN	0.00930167	754	28	6	GO:0046649	GO:BP	lymphocyte activation
Oligo	0.00965299	409	34	6	GO:0010959	GO:BP	regulation of metal ion transport
ExN	0.00969053	357	449	21	GO:0048638	GO:BP	regulation of developmental growth
ExN	0.00969053	1358	449	55	GO:0051241	GO:BP	negative regulation of multicellular organismal process
InN	0.00974392	1749	28	9	GO:0042127	GO:BP	regulation of cell population proliferation
InN	0.00977394	30	28	2	GO:0002888	GO:BP	positive regulation of myeloid leukocyte mediated immunity
InN	0.00977394	30	28	2	GO:0042226	GO:BP	interleukin-6 biosynthetic process
InN	0.00977394	30	28	2	GO:0002861	GO:BP	regulation of inflammatory response to antigenic stimulus
ExN	0.00997654	6	449	3	GO:0150104	GO:BP	transport across blood-brain barrier
ExN	0.00997654	6	449	3	GO:0055059	GO:BP	asymmetric neuroblast division
InN	0.0100211	3000	28	12	GO:0022607	GO:BP	cellular component assembly
InN	0.010063	2152	28	10	GO:0012501	GO:BP	programmed cell death
InN	0.0101071	129	28	3	GO:0002920	GO:BP	regulation of humoral immune response
ExN	0.0102702	80	470	8	GO:0005901	GO:CC	caveola
ExN	0.0102942	211	470	14	GO:0098858	GO:CC	actin-based cell projection
ExN	0.0102942	100	470	9	GO:0034705	GO:CC	potassium channel complex
Astro	0.0103559	27	16	2	GO:0048143	GO:BP	astrocyte activation
Astro	0.0103559	27	16	2	GO:0010575	GO:BP	positive regulation of vascular endothelial growth factor production
InN	0.0104558	296	28	4	GO:0002758	GO:BP	innate immune response-activating signal transduction
InN	0.0104558	515	28	5	GO:0002831	GO:BP	regulation of response to biotic stimulus
Astro	0.0104968	2210	16	8	GO:2000026	GO:BP	regulation of multicellular organismal development
Astro	0.0104968	146	16	3	GO:0071901	GO:BP	negative regulation of protein serine/threonine kinase activity
InN	0.0105857	781	28	6	GO:0030029	GO:BP	actin filament-based process
ExN	0.0106342	830	466	40	GO:0015318	GO:MF	inorganic molecular entity transmembrane transporter activity
ExN	0.0106342	718	466	36	GO:0016773	GO:MF	phosphotransferase activity, alcohol group as acceptor
ExN	0.0106342	660	466	34	GO:0008324	GO:MF	cation transmembrane transporter activity
ExN	0.0106342	1838	466	73	GO:0098772	GO:MF	molecular function regulator
ExN	0.0107706	1020	449	44	GO:0040007	GO:BP	growth
ExN	0.0108011	1571	466	64	GO:0030554	GO:MF	adenyl nucleotide binding
ExN	0.0108011	131	466	12	GO:0044325	GO:MF	ion channel binding
ExN	0.0108011	6308	466	200	GO:0043167	GO:MF	ion binding
ExN	0.0108011	1560	466	64	GO:0032559	GO:MF	adenyl ribonucleotide binding
InN	0.0108096	133	28	3	GO:0042089	GO:BP	cytokine biosynthetic process
Astro	0.0108291	1661	16	7	GO:0042325	GO:BP	regulation of phosphorylation
Astro	0.0108291	726	16	5	GO:0099537	GO:BP	trans-synaptic signaling
Astro	0.0108291	717	16	5	GO:0098916	GO:BP	anterograde trans-synaptic signaling
Astro	0.0108291	155	16	3	GO:0030856	GO:BP	regulation of epithelial cell differentiation
Astro	0.0108291	2942	16	9	GO:0032879	GO:BP	regulation of localization
Astro	0.0108291	30	16	2	GO:0035066	GO:BP	positive regulation of histone acetylation
Astro	0.0108291	717	16	5	GO:0007268	GO:BP	chemical synaptic transmission
Astro	0.010844	745	16	5	GO:0099536	GO:BP	synaptic signaling
Astro	0.010844	32	16	2	GO:0002724	GO:BP	regulation of T cell cytokine production
Astro	0.010844	32	16	2	GO:0002675	GO:BP	positive regulation of acute inflammatory response
Astro	0.010844	32	16	2	GO:0010574	GO:BP	regulation of vascular endothelial growth factor production
Astro	0.010844	31	16	2	GO:0048710	GO:BP	regulation of astrocyte differentiation
Astro	0.010844	1699	16	7	GO:0007267	GO:BP	cell-cell signaling
Oligo	0.0109002	137	34	4	GO:0071242	GO:BP	cellular response to ammonium ion
Oligo	0.0109115	2942	34	15	GO:0032879	GO:BP	regulation of localization
InN	0.0109324	134	28	3	GO:0050853	GO:BP	B cell receptor signaling pathway
InN	0.0109324	134	28	3	GO:0042107	GO:BP	cytokine metabolic process
ExN	0.0109687	102	226	11	KEGG:04972	KEGG	Pancreatic secretion
InN	0.0109956	839	28	7	GO:0030141	GO:CC	secretory granule
InN	0.0109956	72	28	3	GO:0070821	GO:CC	tertiary granule membrane
InN	0.0109956	299	28	5	GO:0030667	GO:CC	secretory granule membrane
ExN	0.01114	900	449	40	GO:0098655	GO:BP	cation transmembrane transport
InN	0.0111687	33	28	2	GO:0010039	GO:BP	response to iron ion
InN	0.0111687	33	28	2	GO:0045920	GO:BP	negative regulation of exocytosis
ExN	0.0112615	25	449	5	GO:0014829	GO:BP	vascular smooth muscle contraction
Astro	0.0113181	33	16	2	GO:2000758	GO:BP	positive regulation of peptidyl-lysine acetylation
Oligo	0.011387	1947	34	12	GO:0051049	GO:BP	regulation of transport
Astro	0.0114376	1731	16	7	GO:0048585	GO:BP	negative regulation of response to stimulus
Astro	0.0114376	5604	16	12	GO:0007275	GO:BP	multicellular organism development
Astro	0.0114376	34	16	2	GO:0010573	GO:BP	vascular endothelial growth factor production
ExN	0.0116309	70	449	8	GO:0015800	GO:BP	acidic amino acid transport
ExN	0.0116309	724	449	34	GO:0032870	GO:BP	cellular response to hormone stimulus
ExN	0.0116684	192	449	14	GO:0048639	GO:BP	positive regulation of developmental growth
InN	0.0117361	2210	28	10	GO:2000026	GO:BP	regulation of multicellular organismal development
InN	0.0117361	34	28	2	GO:0097421	GO:BP	liver regeneration
ExN	0.0119342	19	470	4	GO:0016010	GO:CC	dystrophin-associated glycoprotein complex
ExN	0.0119342	5842	470	177	GO:0031224	GO:CC	intrinsic component of membrane
ExN	0.0119342	19	470	4	GO:0090665	GO:CC	glycoprotein complex
ExN	0.0119342	19	470	4	GO:0098945	GO:CC	intrinsic component of presynaptic active zone membrane
InN	0.0120355	807	28	6	GO:0031347	GO:BP	regulation of defense response
InN	0.0121682	539	28	5	GO:0043902	GO:BP	positive regulation of multi-organism process
InN	0.0122195	141	28	3	GO:0097530	GO:BP	granulocyte migration
InN	0.0124347	1130	28	7	GO:0071345	GO:BP	cellular response to cytokine stimulus
InN	0.0124347	318	28	4	GO:0002218	GO:BP	activation of innate immune response
InN	0.0124347	823	28	6	GO:0060341	GO:BP	regulation of cellular localization
InN	0.0124347	1	28	1	GO:0060101	GO:BP	negative regulation of phagocytosis, engulfment
InN	0.0124347	1	28	1	GO:0002897	GO:BP	positive regulation of central B cell tolerance induction
InN	0.0124347	1	28	1	GO:0002895	GO:BP	regulation of central B cell tolerance induction
InN	0.0124347	37	28	2	GO:0002755	GO:BP	MyD88-dependent toll-like receptor signaling pathway
InN	0.0124347	1	28	1	GO:0002721	GO:BP	regulation of B cell cytokine production
InN	0.0124347	1	28	1	GO:0044722	GO:BP	renal phosphate excretion
InN	0.0124347	318	28	4	GO:0001818	GO:BP	negative regulation of cytokine production
InN	0.0124347	6889	28	19	GO:0051179	GO:BP	localization
InN	0.0124347	143	28	3	GO:0046425	GO:BP	regulation of receptor signaling pathway via JAK-STAT
InN	0.0124347	1	28	1	GO:0010900	GO:BP	negative regulation of phosphatidylcholine catabolic process
InN	0.0124347	1	28	1	GO:1903803	GO:BP	L-glutamine import across plasma membrane
InN	0.0124347	1	28	1	GO:0003421	GO:BP	growth plate cartilage axis specification
InN	0.0124347	1	28	1	GO:0002510	GO:BP	central B cell tolerance induction
InN	0.0124347	1	28	1	GO:0002646	GO:BP	regulation of central tolerance induction
InN	0.0124347	1	28	1	GO:0002648	GO:BP	positive regulation of central tolerance induction
InN	0.0124347	1	28	1	GO:0072016	GO:BP	glomerular parietal epithelial cell development
InN	0.0124347	144	28	3	GO:0002822	GO:BP	regulation of adaptive immune response based on somatic recombination of immune receptors built from immunoglobulin superfamily domains
InN	0.0124347	1	28	1	GO:1903403	GO:BP	negative regulation of renal phosphate excretion
InN	0.0124347	145	28	3	GO:0002700	GO:BP	regulation of production of molecular mediator of immune response
InN	0.0124347	1	28	1	GO:1902569	GO:BP	negative regulation of activation of Janus kinase activity
InN	0.0124347	1	28	1	GO:0010585	GO:BP	glutamine secretion
InN	0.0124347	144	28	3	GO:0002706	GO:BP	regulation of lymphocyte mediated immunity
InN	0.0124347	1	28	1	GO:1901248	GO:BP	positive regulation of lung ciliated cell differentiation
InN	0.0124347	1	28	1	GO:1903402	GO:BP	regulation of renal phosphate excretion
InN	0.0124663	559	28	5	GO:0060627	GO:BP	regulation of vesicle-mediated transport
InN	0.0124663	327	28	4	GO:1901214	GO:BP	regulation of neuron death
ExN	0.0124798	998	449	43	GO:0014070	GO:BP	response to organic cyclic compound
InN	0.0125123	38	28	2	GO:0002891	GO:BP	positive regulation of immunoglobulin mediated immune response
InN	0.0125123	38	28	2	GO:0002714	GO:BP	positive regulation of B cell mediated immunity
ExN	0.0125866	2896	449	100	GO:0035556	GO:BP	intracellular signal transduction
ExN	0.0125866	340	449	20	GO:0046942	GO:BP	carboxylic acid transport
ExN	0.0125866	366	449	21	GO:0001654	GO:BP	eye development
ExN	0.0125887	5337	449	167	GO:0006810	GO:BP	transport
ExN	0.0125887	265	449	17	GO:0007611	GO:BP	learning or memory
InN	0.0127849	151	28	3	GO:0002262	GO:BP	myeloid cell homeostasis
InN	0.0127849	151	28	3	GO:1902107	GO:BP	positive regulation of leukocyte differentiation
ExN	0.0128775	420	449	23	GO:0001558	GO:BP	regulation of cell growth
ExN	0.0129533	59	226	8	KEGG:04730	KEGG	Long-term depression
ExN	0.0129533	165	226	14	KEGG:04022	KEGG	cGMP-PKG signaling pathway
InN	0.0129535	39	28	2	GO:2000008	GO:BP	regulation of protein localization to cell surface
InN	0.0129535	152	28	3	GO:1904892	GO:BP	regulation of receptor signaling pathway via STAT
ExN	0.0130528	1095	449	46	GO:0009887	GO:BP	animal organ morphogenesis
ExN	0.0131381	342	449	20	GO:0015849	GO:BP	organic acid transport
ExN	0.013234	1002	466	45	GO:0016772	GO:MF	transferase activity, transferring phosphorus-containing groups
Oligo	0.013384	58	34	3	GO:0042220	GO:BP	response to cocaine
Astro	0.0134158	6772	16	13	GO:0023052	GO:BP	signaling
Astro	0.0134158	436	16	4	GO:0001933	GO:BP	negative regulation of protein phosphorylation
InN	0.0135649	40	28	2	GO:2000249	GO:BP	regulation of actin cytoskeleton reorganization
ExN	0.0135958	2010	449	74	GO:0040011	GO:BP	locomotion
ExN	0.0135958	6296	449	192	GO:0007165	GO:BP	signal transduction
ExN	0.0136357	2385	449	85	GO:0050790	GO:BP	regulation of catalytic activity
ExN	0.0138215	370	449	21	GO:0150063	GO:BP	visual system development
Astro	0.0139616	49	9	2	KEGG:05144	KEGG	Malaria
Oligo	0.0139688	1376	36	9	GO:0043005	GO:CC	neuron projection
Astro	0.0140623	2432	16	8	GO:0007399	GO:BP	nervous system development
ExN	0.014102	345	466	21	GO:0060589	GO:MF	nucleoside-triphosphatase regulator activity
ExN	0.014102	1068	466	47	GO:0022857	GO:MF	transmembrane transporter activity
ExN	0.014102	446	466	25	GO:0046873	GO:MF	metal ion transmembrane transporter activity
InN	0.0143094	158	28	3	GO:0050777	GO:BP	negative regulation of immune response
ExN	0.0143119	373	466	22	GO:0042578	GO:MF	phosphoric ester hydrolase activity
ExN	0.0143119	613	466	31	GO:0004672	GO:MF	protein kinase activity
ExN	0.0143973	1781	449	67	GO:0048870	GO:BP	cell motility
ExN	0.0143973	1781	449	67	GO:0051674	GO:BP	localization of cell
InN	0.0144485	159	28	3	GO:0002819	GO:BP	regulation of adaptive immune response
InN	0.0144485	159	28	3	GO:0032675	GO:BP	regulation of interleukin-6 production
ExN	0.0146026	192	226	15	KEGG:04020	KEGG	Calcium signaling pathway
ExN	0.0146026	114	226	11	KEGG:04724	KEGG	Glutamatergic synapse
ExN	0.0146897	1072	449	45	GO:0051093	GO:BP	negative regulation of developmental process
ExN	0.0147005	27	449	5	GO:0003148	GO:BP	outflow tract septum morphogenesis
Astro	0.0147374	187	16	3	GO:0043409	GO:BP	negative regulation of MAPK cascade
Astro	0.0147374	2480	16	8	GO:0016310	GO:BP	phosphorylation
Astro	0.0147374	41	16	2	GO:0046825	GO:BP	regulation of protein export from nucleus
Astro	0.0147374	191	16	3	GO:0048167	GO:BP	regulation of synaptic plasticity
Astro	0.0147374	457	16	4	GO:0099177	GO:BP	regulation of trans-synaptic signaling
Astro	0.0147374	456	16	4	GO:0050804	GO:BP	modulation of chemical synaptic transmission
Astro	0.0147696	1862	16	7	GO:0051174	GO:BP	regulation of phosphorus metabolic process
Astro	0.0147696	1861	16	7	GO:0019220	GO:BP	regulation of phosphate metabolic process
Astro	0.0147696	42	16	2	GO:0002369	GO:BP	T cell cytokine production
ExN	0.0148376	7	449	3	GO:0042747	GO:BP	circadian sleep/wake cycle, REM sleep
ExN	0.0148376	7	449	3	GO:1902803	GO:BP	regulation of synaptic vesicle transport
ExN	0.0148376	7	449	3	GO:0003321	GO:BP	positive regulation of blood pressure by epinephrine-norepinephrine
ExN	0.0149355	1620	449	62	GO:0016477	GO:BP	cell migration
Astro	0.0150555	1876	16	7	GO:1902531	GO:BP	regulation of intracellular signal transduction
Astro	0.0150555	43	16	2	GO:1901985	GO:BP	positive regulation of protein acetylation
ExN	0.0150846	98	226	10	KEGG:05231	KEGG	Choline metabolism in cancer
Astro	0.0151266	44	16	2	GO:0002711	GO:BP	positive regulation of T cell mediated immunity
Astro	0.0151266	476	16	4	GO:0042326	GO:BP	negative regulation of phosphorylation
Astro	0.0151266	3244	16	9	GO:0009966	GO:BP	regulation of signal transduction
InN	0.0152793	2779	28	11	GO:0050793	GO:BP	regulation of developmental process
ExN	0.0153163	1107	449	46	GO:0042327	GO:BP	positive regulation of phosphorylation
InN	0.0153183	163	28	3	GO:1903305	GO:BP	regulation of regulated secretory pathway
InN	0.0153183	163	28	3	GO:0001906	GO:BP	cell killing
InN	0.0153649	3241	28	12	GO:0044085	GO:BP	cellular component biogenesis
Astro	0.0154579	1900	16	7	GO:0010647	GO:BP	positive regulation of cell communication
InN	0.0154608	164	28	3	GO:0007259	GO:BP	receptor signaling pathway via JAK-STAT
Astro	0.0155929	62	9	2	KEGG:04623	KEGG	Cytosolic DNA-sensing pathway
Astro	0.0155929	62	9	2	KEGG:05321	KEGG	Inflammatory bowel disease (IBD)
Astro	0.0155929	57	9	2	KEGG:05134	KEGG	Legionellosis
Astro	0.0156136	1907	16	7	GO:0023056	GO:BP	positive regulation of signaling
ExN	0.0156295	375	449	21	GO:0048880	GO:BP	sensory system development
ExN	0.015693	1493	449	58	GO:0001932	GO:BP	regulation of protein phosphorylation
ExN	0.0157255	224	449	15	GO:0019722	GO:BP	calcium-mediated signaling
Astro	0.0157311	46	16	2	GO:0150077	GO:BP	regulation of neuroinflammatory response
Astro	0.0157311	1917	16	7	GO:0031399	GO:BP	regulation of protein modification process
ExN	0.0157741	298	449	18	GO:0098656	GO:BP	anion transmembrane transport
Astro	0.0159205	1932	16	7	GO:0045595	GO:BP	regulation of cell differentiation
Astro	0.0159205	47	16	2	GO:0006953	GO:BP	acute-phase response
Astro	0.0159205	47	16	2	GO:0001504	GO:BP	neurotransmitter uptake
ExN	0.0159443	350	449	20	GO:0010721	GO:BP	negative regulation of cell development
ExN	0.0159443	324	449	19	GO:0051961	GO:BP	negative regulation of nervous system development
ExN	0.0159843	5692	470	172	GO:0016021	GO:CC	integral component of membrane
Astro	0.0160744	3356	16	9	GO:0051239	GO:BP	regulation of multicellular organismal process
Astro	0.0160744	1	16	1	GO:1901676	GO:BP	positive regulation of histone H3-K27 acetylation
Astro	0.0160744	50	16	2	GO:0010718	GO:BP	positive regulation of epithelial to mesenchymal transition
Astro	0.0160744	1947	16	7	GO:0051049	GO:BP	regulation of transport
Astro	0.0160744	5020	16	11	GO:0048731	GO:BP	system development
Astro	0.0160744	1	16	1	GO:0031549	GO:BP	negative regulation of brain-derived neurotrophic factor receptor signaling pathway
Astro	0.0160744	48	16	2	GO:0002673	GO:BP	regulation of acute inflammatory response
Astro	0.0160744	1	16	1	GO:0045380	GO:BP	positive regulation of interleukin-17 biosynthetic process
Astro	0.0160744	1	16	1	GO:0035505	GO:BP	positive regulation of myosin light chain kinase activity
Astro	0.0160744	1	16	1	GO:0035504	GO:BP	regulation of myosin light chain kinase activity
ExN	0.0161313	523	470	25	GO:0043025	GO:CC	neuronal cell body
Astro	0.0163098	3367	16	9	GO:0006796	GO:BP	phosphate-containing compound metabolic process
ExN	0.016371	6481	449	196	GO:0016043	GO:BP	cellular component organization
InN	0.0165097	45	28	2	GO:0042036	GO:BP	negative regulation of cytokine biosynthetic process
InN	0.0166227	169	28	3	GO:0032635	GO:BP	interleukin-6 production
InN	0.0166227	2820	28	11	GO:0009653	GO:BP	anatomical structure morphogenesis
InN	0.0166227	361	28	4	GO:0032386	GO:BP	regulation of intracellular transport
InN	0.0166227	1225	28	7	GO:0034097	GO:BP	response to cytokine
InN	0.0167267	363	28	4	GO:0006959	GO:BP	humoral immune response
InN	0.0169959	365	28	4	GO:0070997	GO:BP	neuron death
Oligo	0.0170058	830	36	7	GO:0015318	GO:MF	inorganic molecular entity transmembrane transporter activity
Oligo	0.0170058	24	36	2	GO:0044183	GO:MF	protein folding chaperone
Oligo	0.0170058	609	36	6	GO:0022890	GO:MF	inorganic cation transmembrane transporter activity
Oligo	0.0170058	26	36	2	GO:0001965	GO:MF	G-protein alpha-subunit binding
Astro	0.0171154	3393	16	9	GO:0006793	GO:BP	phosphorus metabolic process
InN	0.0171449	172	28	3	GO:0030833	GO:BP	regulation of actin filament polymerization
Oligo	0.0171848	64	34	3	GO:0045600	GO:BP	positive regulation of fat cell differentiation
Astro	0.0172255	6105	16	12	GO:0048856	GO:BP	anatomical structure development
ExN	0.0172416	2	449	2	GO:1904049	GO:BP	negative regulation of spontaneous neurotransmitter secretion
ExN	0.0172416	2	449	2	GO:0015878	GO:BP	biotin transport
ExN	0.0172416	7772	449	229	GO:0051716	GO:BP	cellular response to stimulus
Astro	0.0172471	53	16	2	GO:0007632	GO:BP	visual behavior
ExN	0.0173565	115	449	10	GO:0042752	GO:BP	regulation of circadian rhythm
InN	0.017428	47	28	2	GO:2000107	GO:BP	negative regulation of leukocyte apoptotic process
ExN	0.0175676	89	470	8	GO:0008076	GO:CC	voltage-gated potassium channel complex
InN	0.0175782	174	28	3	GO:0097696	GO:BP	receptor signaling pathway via STAT
Oligo	0.0176355	1457	34	10	GO:0051094	GO:BP	positive regulation of developmental process
Oligo	0.0176355	1758	34	11	GO:0009719	GO:BP	response to endogenous stimulus
Astro	0.0177239	54	16	2	GO:0035065	GO:BP	regulation of histone acetylation
ExN	0.0177913	1024	449	43	GO:0009725	GO:BP	response to hormone
Astro	0.0179568	2027	16	7	GO:0006468	GO:BP	protein phosphorylation
InN	0.017957	48	28	2	GO:0045806	GO:BP	negative regulation of endocytosis
InN	0.017957	48	28	2	GO:0002686	GO:BP	negative regulation of leukocyte migration
InN	0.0180629	374	28	4	GO:0006909	GO:BP	phagocytosis
InN	0.0180629	374	28	4	GO:0045089	GO:BP	positive regulation of innate immune response
ExN	0.0180964	871	449	38	GO:0098660	GO:BP	inorganic ion transmembrane transport
ExN	0.0182531	547	449	27	GO:0015672	GO:BP	monovalent inorganic cation transport
ExN	0.0182531	77	449	8	GO:0099601	GO:BP	regulation of neurotransmitter receptor activity
InN	0.0183995	1620	28	8	GO:0016477	GO:BP	cell migration
InN	0.0184949	926	28	6	GO:0043066	GO:BP	negative regulation of apoptotic process
Astro	0.0185044	56	16	2	GO:0007566	GO:BP	embryo implantation
Astro	0.0185044	56	16	2	GO:0002720	GO:BP	positive regulation of cytokine production involved in immune response
ExN	0.0185116	409	449	22	GO:0010959	GO:BP	regulation of metal ion transport
ExN	0.0186169	3	470	2	GO:1990452	GO:CC	Parkin-FBXW7-Cul1 ubiquitin ligase complex
ExN	0.0187124	492	449	25	GO:0034765	GO:BP	regulation of ion transmembrane transport
ExN	0.0189465	17	449	4	GO:0007216	GO:BP	G protein-coupled glutamate receptor signaling pathway
ExN	0.0191013	887	466	40	GO:0015075	GO:MF	ion transmembrane transporter activity
ExN	0.0191013	1502	466	60	GO:0005524	GO:MF	ATP binding
ExN	0.0191013	1223	466	51	GO:0005215	GO:MF	transporter activity
ExN	0.0191013	520	466	27	GO:0008047	GO:MF	enzyme activator activity
ExN	0.0191013	1929	466	73	GO:0032553	GO:MF	ribonucleotide binding
ExN	0.0192306	305	449	18	GO:0050890	GO:BP	cognition
Astro	0.0193367	550	16	4	GO:1903827	GO:BP	regulation of cellular protein localization
Astro	0.0193367	241	16	3	GO:0006469	GO:BP	negative regulation of protein kinase activity
ExN	0.0194069	27	466	5	GO:0008066	GO:MF	glutamate receptor activity
ExN	0.0194069	27	466	5	GO:0030247	GO:MF	polysaccharide binding
ExN	0.0194069	609	466	30	GO:0022890	GO:MF	inorganic cation transmembrane transporter activity
ExN	0.0194069	56	466	7	GO:0003707	GO:MF	steroid hormone receptor activity
ExN	0.0194069	991	466	43	GO:0008092	GO:MF	cytoskeletal protein binding
Astro	0.0194158	552	16	4	GO:1902532	GO:BP	negative regulation of intracellular signal transduction
ExN	0.0197214	1447	449	56	GO:0022610	GO:BP	biological adhesion
Oligo	0.0197782	887	36	7	GO:0015075	GO:MF	ion transmembrane transporter activity
Oligo	0.0197782	660	36	6	GO:0008324	GO:MF	cation transmembrane transporter activity
Oligo	0.0197782	1	36	1	GO:0016521	GO:MF	pituitary adenylate cyclase activating polypeptide activity
Oligo	0.0197782	1	36	1	GO:0008892	GO:MF	guanine deaminase activity
Oligo	0.0197782	33	36	2	GO:0005251	GO:MF	delayed rectifier potassium channel activity
Oligo	0.0197782	1	36	1	GO:0031249	GO:MF	denatured protein binding
Oligo	0.0197782	1	36	1	GO:0031858	GO:MF	pituitary adenylate cyclase-activating polypeptide receptor binding
ExN	0.0198557	592	470	27	GO:0044297	GO:CC	cell body
ExN	0.0198948	1913	466	72	GO:0032555	GO:MF	purine ribonucleotide binding
ExN	0.0199395	1032	449	43	GO:0001934	GO:BP	positive regulation of protein phosphorylation
InN	0.0199677	2	28	1	GO:0033026	GO:BP	negative regulation of mast cell apoptotic process
InN	0.0199677	2	28	1	GO:0002344	GO:BP	B cell affinity maturation
InN	0.0199677	2	28	1	GO:0002522	GO:BP	leukocyte migration involved in immune response
InN	0.0199677	2	28	1	GO:0002343	GO:BP	peripheral B cell selection
InN	0.0199677	2	28	1	GO:0014806	GO:BP	smooth muscle hyperplasia
InN	0.0199677	2	28	1	GO:0032764	GO:BP	negative regulation of mast cell cytokine production
InN	0.0199677	189	28	3	GO:0008064	GO:BP	regulation of actin polymerization or depolymerization
InN	0.0199677	2	28	1	GO:0002508	GO:BP	central tolerance induction
InN	0.0199677	2	28	1	GO:2000417	GO:BP	negative regulation of eosinophil migration
InN	0.0199677	2	28	1	GO:1905154	GO:BP	negative regulation of membrane invagination
InN	0.0199677	2	28	1	GO:0110090	GO:BP	positive regulation of hippocampal neuron apoptotic process
InN	0.0199677	2	28	1	GO:1901246	GO:BP	regulation of lung ciliated cell differentiation
InN	0.0199677	2	28	1	GO:0006788	GO:BP	heme oxidation
InN	0.0199677	2	28	1	GO:0051134	GO:BP	negative regulation of NK T cell activation
InN	0.0199677	2	28	1	GO:1905078	GO:BP	positive regulation of interleukin-17 secretion
InN	0.0199677	2	28	1	GO:0002635	GO:BP	negative regulation of germinal center formation
InN	0.0199677	2	28	1	GO:0034125	GO:BP	negative regulation of MyD88-dependent toll-like receptor signaling pathway
InN	0.0199677	189	28	3	GO:0030041	GO:BP	actin filament polymerization
InN	0.0199677	2	28	1	GO:0002368	GO:BP	B cell cytokine production
InN	0.0199677	2	28	1	GO:0002661	GO:BP	regulation of B cell tolerance induction
InN	0.0199677	2	28	1	GO:1902567	GO:BP	negative regulation of eosinophil activation
InN	0.0199677	948	28	6	GO:0043069	GO:BP	negative regulation of programmed cell death
InN	0.0199677	2	28	1	GO:0002663	GO:BP	positive regulation of B cell tolerance induction
InN	0.0201065	190	28	3	GO:0030832	GO:BP	regulation of actin filament length
InN	0.0201065	396	28	4	GO:0002696	GO:BP	positive regulation of leukocyte activation
Astro	0.0202502	60	16	2	GO:0032722	GO:BP	positive regulation of chemokine production
Astro	0.0202502	60	16	2	GO:2000756	GO:BP	regulation of peptidyl-lysine acetylation
ExN	0.020269	8	449	3	GO:0099542	GO:BP	trans-synaptic signaling by endocannabinoid
ExN	0.020269	8	449	3	GO:0070459	GO:BP	prolactin secretion
ExN	0.020269	8	449	3	GO:0021684	GO:BP	cerebellar granular layer formation
ExN	0.020269	8	449	3	GO:0021707	GO:BP	cerebellar granule cell differentiation
ExN	0.020269	8	449	3	GO:0051823	GO:BP	regulation of synapse structural plasticity
ExN	0.020269	8	449	3	GO:0099541	GO:BP	trans-synaptic signaling by lipid
ExN	0.0203204	282	449	17	GO:0072593	GO:BP	reactive oxygen species metabolic process
InN	0.0203281	1009	28	7	GO:0099503	GO:CC	secretory vesicle
InN	0.0203281	22	28	2	GO:0042629	GO:CC	mast cell granule
Astro	0.0205071	102	9	2	KEGG:04620	KEGG	Toll-like receptor signaling pathway
Astro	0.0205071	88	9	2	KEGG:05323	KEGG	Rheumatoid arthritis
Astro	0.0205071	101	9	2	KEGG:05146	KEGG	Amoebiasis
Astro	0.0205071	104	9	2	KEGG:04625	KEGG	C-type lectin receptor signaling pathway
Astro	0.0205071	101	9	2	KEGG:05142	KEGG	Chagas disease (American trypanosomiasis)
Astro	0.0205071	95	9	2	KEGG:04640	KEGG	Hematopoietic cell lineage
Astro	0.0205071	292	9	3	KEGG:04060	KEGG	Cytokine-cytokine receptor interaction
Astro	0.0205071	92	9	2	KEGG:04657	KEGG	IL-17 signaling pathway
Astro	0.0205071	76	9	2	KEGG:05133	KEGG	Pertussis
Astro	0.0205071	104	9	2	KEGG:04659	KEGG	Th17 cell differentiation
Astro	0.0205071	100	9	2	KEGG:04933	KEGG	AGE-RAGE signaling pathway in diabetic complications
Astro	0.0206985	2779	16	8	GO:0050793	GO:BP	regulation of developmental process
ExN	0.0207699	820	449	36	GO:0001944	GO:BP	vasculature development
InN	0.0210351	55	28	2	GO:0032653	GO:BP	regulation of interleukin-10 production
ExN	0.0212617	613	449	29	GO:0033674	GO:BP	positive regulation of kinase activity
ExN	0.021282	163	449	12	GO:0001764	GO:BP	neuron migration
ExN	0.021389	556	449	27	GO:0043410	GO:BP	positive regulation of MAPK cascade
ExN	0.021389	362	449	20	GO:0006936	GO:BP	muscle contraction
ExN	0.0214228	295	466	18	GO:0050662	GO:MF	coenzyme binding
ExN	0.0216218	673	449	31	GO:0071417	GO:BP	cellular response to organonitrogen compound
ExN	0.0217267	472	449	24	GO:0003012	GO:BP	muscle system process
ExN	0.0218989	18	449	4	GO:0061298	GO:BP	retina vasculature development in camera-type eye
ExN	0.0218989	100	449	9	GO:0003073	GO:BP	regulation of systemic arterial blood pressure
ExN	0.0218989	18	449	4	GO:0021756	GO:BP	striatum development
ExN	0.0218989	1296	449	51	GO:0051336	GO:BP	regulation of hydrolase activity
ExN	0.0218989	142	449	11	GO:0035023	GO:BP	regulation of Rho protein signal transduction
ExN	0.0218989	260	449	16	GO:0090257	GO:BP	regulation of muscle system process
InN	0.0224082	409	28	4	GO:0032970	GO:BP	regulation of actin filament-based process
InN	0.0224082	57	28	2	GO:0002763	GO:BP	positive regulation of myeloid leukocyte differentiation
Astro	0.022602	64	16	2	GO:0061900	GO:BP	glial cell activation
ExN	0.0226161	1926	466	72	GO:0017076	GO:MF	purine nucleotide binding
InN	0.0226541	411	28	4	GO:0050867	GO:BP	positive regulation of cell activation
Astro	0.0228948	65	16	2	GO:0030858	GO:BP	positive regulation of epithelial cell differentiation
Astro	0.0228948	262	16	3	GO:0033673	GO:BP	negative regulation of kinase activity
ExN	0.0229012	46	449	6	GO:0090278	GO:BP	negative regulation of peptide hormone secretion
ExN	0.0229181	1661	449	62	GO:0042325	GO:BP	regulation of phosphorylation
InN	0.0229314	679	28	5	GO:0030036	GO:BP	actin cytoskeleton organization
InN	0.0229488	58	28	2	GO:0032613	GO:BP	interleukin-10 production
Astro	0.0235747	599	16	4	GO:0045936	GO:BP	negative regulation of phosphate metabolic process
Astro	0.0235747	1032	16	5	GO:0001934	GO:BP	positive regulation of protein phosphorylation
Astro	0.0235747	600	16	4	GO:0010563	GO:BP	negative regulation of phosphorus metabolic process
Astro	0.0235747	68	16	2	GO:0046824	GO:BP	positive regulation of nucleocytoplasmic transport
Astro	0.0235747	1031	16	5	GO:0007417	GO:BP	central nervous system development
Astro	0.0235747	67	16	2	GO:0002709	GO:BP	regulation of T cell mediated immunity
Astro	0.0235747	67	16	2	GO:0046888	GO:BP	negative regulation of hormone secretion
ExN	0.0236226	829	449	36	GO:0072358	GO:BP	cardiovascular system development
InN	0.0237513	5020	28	15	GO:0048731	GO:BP	system development
Astro	0.0238854	2	16	1	GO:0043974	GO:BP	histone H3-K27 acetylation
Astro	0.0238854	2	16	1	GO:1903597	GO:BP	negative regulation of gap junction assembly
Astro	0.0238854	2	16	1	GO:1901674	GO:BP	regulation of histone H3-K27 acetylation
Astro	0.0238854	71	16	2	GO:0042108	GO:BP	positive regulation of cytokine biosynthetic process
Astro	0.0238854	1574	16	6	GO:0048699	GO:BP	generation of neurons
Astro	0.0238854	1050	16	5	GO:1902533	GO:BP	positive regulation of intracellular signal transduction
Astro	0.0238854	2	16	1	GO:0002384	GO:BP	hepatic immune response
Astro	0.0238854	2	16	1	GO:0031548	GO:BP	regulation of brain-derived neurotrophic factor receptor signaling pathway
Astro	0.0238854	2896	16	8	GO:0035556	GO:BP	intracellular signal transduction
InN	0.0238871	204	28	3	GO:0002685	GO:BP	regulation of leukocyte migration
Astro	0.0239627	2215	16	7	GO:0048468	GO:BP	cell development
Astro	0.0241595	2922	16	8	GO:0051246	GO:BP	regulation of protein metabolic process
Astro	0.0241595	72	16	2	GO:0042531	GO:BP	positive regulation of tyrosine phosphorylation of STAT protein
Oligo	0.024182	680	36	6	GO:0098797	GO:CC	plasma membrane protein complex
InN	0.0242772	60	28	2	GO:0031663	GO:BP	lipopolysaccharide-mediated signaling pathway
Astro	0.0244074	73	16	2	GO:0045685	GO:BP	regulation of glial cell differentiation
Astro	0.0244074	1076	16	5	GO:0007167	GO:BP	enzyme linked receptor protein signaling pathway
Astro	0.0244074	74	16	2	GO:1901983	GO:BP	regulation of protein acetylation
Astro	0.0244074	1076	16	5	GO:0032880	GO:BP	regulation of protein localization
Astro	0.0244074	74	16	2	GO:0019915	GO:BP	lipid storage
Oligo	0.0246216	142	36	3	GO:0016247	GO:MF	channel regulator activity
Oligo	0.0246216	142	36	3	GO:0022834	GO:MF	ligand-gated channel activity
Oligo	0.0246216	142	36	3	GO:0015276	GO:MF	ligand-gated ion channel activity
InN	0.024965	5604	28	16	GO:0007275	GO:BP	multicellular organism development
ExN	0.0250594	1177	449	47	GO:0010562	GO:BP	positive regulation of phosphorus metabolic process
ExN	0.0250594	47	449	6	GO:0061001	GO:BP	regulation of dendritic spine morphogenesis
ExN	0.0250594	1437	449	55	GO:0050877	GO:BP	nervous system process
ExN	0.0250594	47	449	6	GO:0051489	GO:BP	regulation of filopodium assembly
ExN	0.0250594	1177	449	47	GO:0045937	GO:BP	positive regulation of phosphate metabolic process
Astro	0.0251189	635	16	4	GO:0031400	GO:BP	negative regulation of protein modification process
Astro	0.0251189	291	16	3	GO:0051348	GO:BP	negative regulation of transferase activity
InN	0.0251382	426	28	4	GO:0030099	GO:BP	myeloid cell differentiation
Astro	0.0251757	76	16	2	GO:0070373	GO:BP	negative regulation of ERK1 and ERK2 cascade
ExN	0.0252468	2269	466	82	GO:0097367	GO:MF	carbohydrate derivative binding
ExN	0.0253112	88	226	9	KEGG:04540	KEGG	Gap junction
ExN	0.0256585	83	449	8	GO:0001570	GO:BP	vasculogenesis
ExN	0.0256585	83	449	8	GO:2000300	GO:BP	regulation of synaptic vesicle exocytosis
InN	0.0257653	4531	28	14	GO:0048869	GO:BP	cellular developmental process
InN	0.0258147	211	28	3	GO:0097529	GO:BP	myeloid leukocyte migration
Astro	0.0258454	120	9	2	KEGG:05135	KEGG	Yersinia infection
ExN	0.0259593	1440	449	55	GO:0007155	GO:BP	cell adhesion
ExN	0.0260519	400	470	20	GO:0045177	GO:CC	apical part of cell
InN	0.0260711	212	28	3	GO:0002573	GO:BP	myeloid leukocyte differentiation
InN	0.0261648	3	28	1	GO:1904149	GO:BP	regulation of microglial cell mediated cytotoxicity
InN	0.0261648	3	28	1	GO:0033024	GO:BP	mast cell apoptotic process
InN	0.0261648	65	28	2	GO:0002437	GO:BP	inflammatory response to antigenic stimulus
InN	0.0261648	3	28	1	GO:0033025	GO:BP	regulation of mast cell apoptotic process
InN	0.0261648	63	28	2	GO:0034394	GO:BP	protein localization to cell surface
InN	0.0261648	3	28	1	GO:0034395	GO:BP	regulation of transcription from RNA polymerase II promoter in response to iron
InN	0.0261648	3	28	1	GO:0010899	GO:BP	regulation of phosphatidylcholine catabolic process
InN	0.0261648	3	28	1	GO:0002442	GO:BP	serotonin secretion involved in inflammatory response
InN	0.0261648	64	28	2	GO:0007588	GO:BP	excretion
InN	0.0261648	3	28	1	GO:0002894	GO:BP	positive regulation of type II hypersensitivity
InN	0.0261648	3	28	1	GO:0033023	GO:BP	mast cell homeostasis
InN	0.0261648	3	28	1	GO:0045728	GO:BP	respiratory burst after phagocytosis
InN	0.0261648	216	28	3	GO:0008154	GO:BP	actin polymerization or depolymerization
InN	0.0261648	3	28	1	GO:0032765	GO:BP	positive regulation of mast cell cytokine production
InN	0.0261648	3	28	1	GO:0090634	GO:BP	microglial cell mediated cytotoxicity
InN	0.0261648	3	28	1	GO:0072139	GO:BP	glomerular parietal epithelial cell differentiation
InN	0.0261648	3	28	1	GO:1902685	GO:BP	positive regulation of receptor localization to synapse
InN	0.0261648	3	28	1	GO:1904151	GO:BP	positive regulation of microglial cell mediated cytotoxicity
InN	0.0261648	3	28	1	GO:0002514	GO:BP	B cell tolerance induction
InN	0.0261648	64	28	2	GO:0032387	GO:BP	negative regulation of intracellular transport
InN	0.0261648	3	28	1	GO:0001798	GO:BP	positive regulation of type IIa hypersensitivity
InN	0.0261648	3	28	1	GO:0002554	GO:BP	serotonin secretion by platelet
InN	0.0261648	3	28	1	GO:0061141	GO:BP	lung ciliated cell differentiation
InN	0.0261648	3	28	1	GO:0150064	GO:BP	vertebrate eye-specific patterning
InN	0.0261648	3	28	1	GO:0002351	GO:BP	serotonin production involved in inflammatory response
InN	0.0262225	1039	28	6	GO:0060548	GO:BP	negative regulation of cell death
InN	0.0262904	1781	28	8	GO:0048870	GO:BP	cell motility
InN	0.0262904	1781	28	8	GO:0051674	GO:BP	localization of cell
InN	0.0262904	444	28	4	GO:0045088	GO:BP	regulation of innate immune response
InN	0.0263878	29	28	2	GO:0002102	GO:CC	podosome
InN	0.0264536	1116	28	7	GO:0005623	GO:CC	cell
ExN	0.026694	9	449	3	GO:0001993	GO:BP	regulation of systemic arterial blood pressure by norepinephrine-epinephrine
ExN	0.026694	3061	449	102	GO:0065009	GO:BP	regulation of molecular function
ExN	0.026694	65	449	7	GO:0072665	GO:BP	protein localization to vacuole
Astro	0.0268107	1107	16	5	GO:0042327	GO:BP	positive regulation of phosphorylation
Astro	0.0268172	300	16	3	GO:0090287	GO:BP	regulation of cellular response to growth factor stimulus
ExN	0.0269212	217	449	14	GO:0090276	GO:BP	regulation of peptide hormone secretion
InN	0.0269369	67	28	2	GO:0046888	GO:BP	negative regulation of hormone secretion
ExN	0.0270892	125	449	10	GO:0002062	GO:BP	chondrocyte differentiation
InN	0.0271343	223	28	3	GO:0017157	GO:BP	regulation of exocytosis
InN	0.0271343	223	28	3	GO:0043523	GO:BP	regulation of neuron apoptotic process
Astro	0.027208	6630	16	12	GO:0032502	GO:BP	developmental process
Astro	0.027208	80	16	2	GO:0043407	GO:BP	negative regulation of MAP kinase activity
Oligo	0.0273612	35	36	2	GO:0008180	GO:CC	COP9 signalosome
Astro	0.0273733	81	16	2	GO:0010827	GO:BP	regulation of glucose transmembrane transport
Astro	0.0273733	81	16	2	GO:0150076	GO:BP	neuroinflammatory response
Astro	0.0275588	1679	16	6	GO:0022008	GO:BP	neurogenesis
Astro	0.0277114	3	16	1	GO:0060559	GO:BP	positive regulation of calcidiol 1-monooxygenase activity
Astro	0.0277114	3	16	1	GO:0045378	GO:BP	regulation of interleukin-17 biosynthetic process
Astro	0.0277114	1146	16	5	GO:0048666	GO:BP	neuron development
Astro	0.0277114	3	16	1	GO:0045079	GO:BP	negative regulation of chemokine biosynthetic process
Astro	0.0277114	86	16	2	GO:0002718	GO:BP	regulation of cytokine production involved in immune response
Astro	0.0277114	84	16	2	GO:0042509	GO:BP	regulation of tyrosine phosphorylation of STAT protein
Astro	0.0277114	7873	16	13	GO:0032501	GO:BP	multicellular organismal process
Astro	0.0277114	3	16	1	GO:0042235	GO:BP	interleukin-17 biosynthetic process
Astro	0.0277114	87	16	2	GO:0060291	GO:BP	long-term synaptic potentiation
Astro	0.0277114	86	16	2	GO:0007260	GO:BP	tyrosine phosphorylation of STAT protein
Astro	0.0277114	3	16	1	GO:0060557	GO:BP	positive regulation of vitamin D biosynthetic process
Astro	0.0277114	320	16	3	GO:0046879	GO:BP	hormone secretion
Astro	0.0277114	3	16	1	GO:0010625	GO:BP	positive regulation of Schwann cell proliferation
Astro	0.0277114	3	16	1	GO:0071386	GO:BP	cellular response to corticosterone stimulus
Astro	0.0277114	3	16	1	GO:0010481	GO:BP	epidermal cell division
Astro	0.0277114	3	16	1	GO:0010482	GO:BP	regulation of epidermal cell division
Astro	0.0277114	3	16	1	GO:2000676	GO:BP	positive regulation of type B pancreatic cell apoptotic process
Astro	0.0277114	3	16	1	GO:0033092	GO:BP	positive regulation of immature T cell proliferation in thymus
Astro	0.0277114	3	16	1	GO:0099557	GO:BP	trans-synaptic signaling by trans-synaptic complex, modulating synaptic transmission
ExN	0.0277468	5460	449	167	GO:0051234	GO:BP	establishment of localization
ExN	0.0280085	320	449	18	GO:0046879	GO:BP	hormone secretion
Astro	0.0281714	88	16	2	GO:0032642	GO:BP	regulation of chemokine production
InN	0.028238	736	28	5	GO:0009617	GO:BP	response to bacterium
ExN	0.0283331	320	470	17	GO:0045121	GO:CC	membrane raft
ExN	0.0284814	171	449	12	GO:0010469	GO:BP	regulation of signaling receptor activity
ExN	0.0284814	66	449	7	GO:0051965	GO:BP	positive regulation of synapse assembly
ExN	0.0284814	105	449	9	GO:0044264	GO:BP	cellular polysaccharide metabolic process
Astro	0.028624	1736	16	6	GO:0009967	GO:BP	positive regulation of signal transduction
Astro	0.0287775	327	16	3	GO:0009914	GO:BP	hormone transport
ExN	0.028807	321	470	17	GO:0098857	GO:CC	membrane microdomain
ExN	0.0288244	77	470	7	GO:0048786	GO:CC	presynaptic active zone
ExN	0.0288533	781	449	34	GO:0098662	GO:BP	inorganic cation transmembrane transport
Astro	0.0288788	1177	16	5	GO:0010562	GO:BP	positive regulation of phosphorus metabolic process
Astro	0.0288788	91	16	2	GO:0010717	GO:BP	regulation of epithelial to mesenchymal transition
Astro	0.0288788	91	16	2	GO:0046427	GO:BP	positive regulation of receptor signaling pathway via JAK-STAT
Astro	0.0288788	6798	16	12	GO:0007154	GO:BP	cell communication
Astro	0.0288788	1177	16	5	GO:0045937	GO:BP	positive regulation of phosphate metabolic process
ExN	0.0295026	149	449	11	GO:0007612	GO:BP	learning
ExN	0.029682	20	449	4	GO:0008356	GO:BP	asymmetric cell division
ExN	0.029682	692	449	31	GO:0051347	GO:BP	positive regulation of transferase activity
InN	0.0297098	231	28	3	GO:0032271	GO:BP	regulation of protein polymerization
InN	0.0297098	71	28	2	GO:0042108	GO:BP	positive regulation of cytokine biosynthetic process
Astro	0.0299576	93	16	2	GO:0032755	GO:BP	positive regulation of interleukin-6 production
Astro	0.0299576	1194	16	5	GO:0022603	GO:BP	regulation of anatomical structure morphogenesis
ExN	0.0301196	2027	449	72	GO:0006468	GO:BP	protein phosphorylation
ExN	0.0301196	784	449	34	GO:0001568	GO:BP	blood vessel development
ExN	0.0301196	1258	449	49	GO:0031401	GO:BP	positive regulation of protein modification process
ExN	0.0301196	1129	449	45	GO:0051270	GO:BP	regulation of cellular component movement
ExN	0.0301196	173	449	12	GO:0006937	GO:BP	regulation of muscle contraction
ExN	0.0301196	7873	449	229	GO:0032501	GO:BP	multicellular organismal process
ExN	0.0301196	323	449	18	GO:0043010	GO:BP	camera-type eye development
Astro	0.0302555	94	16	2	GO:1904894	GO:BP	positive regulation of receptor signaling pathway via STAT
InN	0.0304387	72	28	2	GO:0042531	GO:BP	positive regulation of tyrosine phosphorylation of STAT protein
Astro	0.030545	95	16	2	GO:0031058	GO:BP	positive regulation of histone modification
Astro	0.030545	95	16	2	GO:0032602	GO:BP	chemokine production
Astro	0.0306002	1206	16	5	GO:0051248	GO:BP	negative regulation of protein metabolic process
ExN	0.0307322	324	470	17	GO:1902495	GO:CC	transmembrane transporter complex
InN	0.0309179	235	28	3	GO:0051495	GO:BP	positive regulation of cytoskeleton organization
InN	0.0310815	73	28	2	GO:0034381	GO:BP	plasma lipoprotein particle clearance
ExN	0.0311205	6667	449	198	GO:0071840	GO:BP	cellular component organization or biogenesis
Astro	0.031294	97	16	2	GO:0002456	GO:BP	T cell mediated immunity
Astro	0.031294	97	16	2	GO:0002824	GO:BP	positive regulation of adaptive immune response based on somatic recombination of immune receptors built from immunoglobulin superfamily domains
InN	0.0313095	2375	28	10	GO:0097708	GO:CC	intracellular vesicle
InN	0.0313095	2372	28	10	GO:0031410	GO:CC	cytoplasmic vesicle
Astro	0.0314319	4	16	1	GO:0045917	GO:BP	positive regulation of complement activation
Astro	0.0314319	99	16	2	GO:0002702	GO:BP	positive regulation of production of molecular mediator of immune response
Astro	0.0314319	4	16	1	GO:0070164	GO:BP	negative regulation of adiponectin secretion
Astro	0.0314319	4	16	1	GO:0070777	GO:BP	D-aspartate transport
Astro	0.0314319	4	16	1	GO:0070779	GO:BP	D-aspartate import across plasma membrane
Astro	0.0314319	4	16	1	GO:0048170	GO:BP	positive regulation of long-term neuronal synaptic plasticity
Astro	0.0314319	4	16	1	GO:0033091	GO:BP	positive regulation of immature T cell proliferation
Astro	0.0314319	4	16	1	GO:0072108	GO:BP	positive regulation of mesenchymal to epithelial transition involved in metanephros morphogenesis
Astro	0.0314319	4	16	1	GO:0048861	GO:BP	leukemia inhibitory factor signaling pathway
Astro	0.0314319	4	16	1	GO:0060708	GO:BP	spongiotrophoblast differentiation
Astro	0.0314319	100	16	2	GO:0042102	GO:BP	positive regulation of T cell proliferation
Astro	0.0314319	4	16	1	GO:0060355	GO:BP	positive regulation of cell adhesion molecule production
Astro	0.0314319	98	16	2	GO:0002708	GO:BP	positive regulation of lymphocyte mediated immunity
ExN	0.0314614	911	449	38	GO:0043549	GO:BP	regulation of kinase activity
ExN	0.0314614	352	449	19	GO:1904062	GO:BP	regulation of cation transmembrane transport
InN	0.0314653	237	28	3	GO:0000302	GO:BP	response to reactive oxygen species
ExN	0.0315355	727	449	32	GO:1901699	GO:BP	cellular response to nitrogen compound
ExN	0.0315355	87	449	8	GO:0048013	GO:BP	ephrin receptor signaling pathway
ExN	0.0316255	64	466	7	GO:0004714	GO:MF	transmembrane receptor protein tyrosine kinase activity
ExN	0.0316255	82	466	8	GO:0019199	GO:MF	transmembrane receptor protein kinase activity
ExN	0.0316255	47	466	6	GO:0098531	GO:MF	ligand-activated transcription factor activity
ExN	0.0316255	443	466	23	GO:0031267	GO:MF	small GTPase binding
ExN	0.0316255	47	466	6	GO:0004879	GO:MF	nuclear receptor activity
ExN	0.0316255	1762	466	66	GO:0008144	GO:MF	drug binding
ExN	0.0316255	19	466	4	GO:0030296	GO:MF	protein tyrosine kinase activator activity
InN	0.0316557	4	28	1	GO:0014900	GO:BP	muscle hyperplasia
InN	0.0316557	4	28	1	GO:0034124	GO:BP	regulation of MyD88-dependent toll-like receptor signaling pathway
InN	0.0316557	239	28	3	GO:0038093	GO:BP	Fc receptor signaling pathway
InN	0.0316557	4	28	1	GO:0038156	GO:BP	interleukin-3-mediated signaling pathway
InN	0.0316557	4	28	1	GO:0150062	GO:BP	complement-mediated synapse pruning
InN	0.0316557	4	28	1	GO:0002282	GO:BP	microglial cell activation involved in immune response
InN	0.0316557	4	28	1	GO:0110088	GO:BP	hippocampal neuron apoptotic process
InN	0.0316557	4	28	1	GO:1902566	GO:BP	regulation of eosinophil activation
InN	0.0316557	4	28	1	GO:0001796	GO:BP	regulation of type IIa hypersensitivity
InN	0.0316557	4	28	1	GO:0001794	GO:BP	type IIa hypersensitivity
InN	0.0316557	4	28	1	GO:0110089	GO:BP	regulation of hippocampal neuron apoptotic process
InN	0.0316557	4	28	1	GO:0038165	GO:BP	oncostatin-M-mediated signaling pathway
InN	0.0316557	4	28	1	GO:0071226	GO:BP	cellular response to molecule of fungal origin
InN	0.0316557	3677	28	12	GO:0048513	GO:BP	animal organ development
InN	0.0316557	4	28	1	GO:0002892	GO:BP	regulation of type II hypersensitivity
InN	0.0316557	4	28	1	GO:0002339	GO:BP	B cell selection
InN	0.0316557	1457	28	7	GO:0051094	GO:BP	positive regulation of developmental process
InN	0.0316557	4	28	1	GO:0006663	GO:BP	platelet activating factor biosynthetic process
InN	0.0316557	4	28	1	GO:0002445	GO:BP	type II hypersensitivity
Oligo	0.0317195	523	36	5	GO:0043025	GO:CC	neuronal cell body
Oligo	0.0317195	1327	36	8	GO:0030054	GO:CC	cell junction
Oligo	0.0317195	42	36	2	GO:0032590	GO:CC	dendrite membrane
Oligo	0.0317195	307	36	4	GO:0150034	GO:CC	distal axon
Oligo	0.0317206	82	34	3	GO:0072347	GO:BP	response to anesthetic
Astro	0.0317941	748	16	4	GO:0051129	GO:BP	negative regulation of cellular component organization
Astro	0.0317941	1245	16	5	GO:0051130	GO:BP	positive regulation of cellular component organization
Astro	0.0317941	102	16	2	GO:0070498	GO:BP	interleukin-1-mediated signaling pathway
Astro	0.0317941	102	16	2	GO:0002821	GO:BP	positive regulation of adaptive immune response
Astro	0.0318945	360	16	3	GO:0001505	GO:BP	regulation of neurotransmitter levels
ExN	0.0319452	223	449	14	GO:0006814	GO:BP	sodium ion transport
ExN	0.031977	4	470	2	GO:0016013	GO:CC	syntrophin complex
ExN	0.031977	4	470	2	GO:0097487	GO:CC	multivesicular body, internal vesicle
ExN	0.031977	4	470	2	GO:0098591	GO:CC	external side of apical plasma membrane
ExN	0.0321359	698	449	31	GO:0048589	GO:BP	developmental growth
InN	0.0322827	77	28	2	GO:0031100	GO:BP	animal organ regeneration
InN	0.0322827	774	28	5	GO:0043900	GO:BP	regulation of multi-organism process
InN	0.0322827	77	28	2	GO:0002532	GO:BP	production of molecular mediator involved in inflammatory response
Oligo	0.0323691	159	36	3	GO:0099699	GO:CC	integral component of synaptic membrane
Oligo	0.0323691	157	36	3	GO:0042734	GO:CC	presynaptic membrane
Astro	0.032378	138	9	2	KEGG:05162	KEGG	Measles
Oligo	0.0327048	2	36	1	GO:0071886	GO:MF	1-(4-iodo-2,5-dimethoxyphenyl)propan-2-amine binding
Oligo	0.0327048	2	36	1	GO:0046556	GO:MF	alpha-L-arabinofuranosidase activity
ExN	0.0328007	327	449	18	GO:0009914	GO:BP	hormone transport
Astro	0.0329271	1258	16	5	GO:0031401	GO:BP	positive regulation of protein modification process
Astro	0.0329271	105	16	2	GO:0002367	GO:BP	cytokine production involved in immune response
Astro	0.0330115	1853	16	6	GO:0051240	GO:BP	positive regulation of multicellular organismal process
ExN	0.0332516	80	470	7	GO:0016528	GO:CC	sarcoplasm
InN	0.0333233	163	28	3	GO:0070820	GO:CC	tertiary granule
ExN	0.0334869	302	470	16	GO:0034702	GO:CC	ion channel complex
ExN	0.0334869	248	470	14	GO:0099568	GO:CC	cytoplasmic region
ExN	0.033522	393	466	21	GO:0015077	GO:MF	monovalent inorganic cation transmembrane transporter activity
ExN	0.0335595	10	449	3	GO:0021683	GO:BP	cerebellar granular layer morphogenesis
ExN	0.0335704	21	449	4	GO:0003085	GO:BP	negative regulation of systemic arterial blood pressure
ExN	0.0335704	21	449	4	GO:0006622	GO:BP	protein targeting to lysosome
ExN	0.0335704	51	449	6	GO:0072666	GO:BP	establishment of protein localization to vacuole
Astro	0.0337055	107	16	2	GO:0033138	GO:BP	positive regulation of peptidyl-serine phosphorylation
Astro	0.0337055	767	16	4	GO:0045596	GO:BP	negative regulation of cell differentiation
ExN	0.0337337	582	449	27	GO:0034762	GO:BP	regulation of transmembrane transport
ExN	0.033754	225	449	14	GO:0007163	GO:BP	establishment or maintenance of cell polarity
Astro	0.0337688	2541	16	7	GO:0051128	GO:BP	regulation of cellular component organization
ExN	0.0343841	331	470	17	GO:0016324	GO:CC	apical plasma membrane
ExN	0.0343841	534	470	24	GO:0031012	GO:CC	extracellular matrix
InN	0.0344375	697	28	5	GO:0005764	GO:CC	lysosome
InN	0.0344375	1694	28	8	GO:0098805	GO:CC	whole membrane
InN	0.0344375	9731	28	22	GO:0016020	GO:CC	membrane
InN	0.0344375	5604	28	16	GO:0005886	GO:CC	plasma membrane
InN	0.0344375	5732	28	16	GO:0071944	GO:CC	cell periphery
InN	0.0344375	3543	28	12	GO:0005615	GO:CC	extracellular space
InN	0.0344375	2	28	1	GO:0005602	GO:CC	complement component C1 complex
InN	0.0344375	697	28	5	GO:0000323	GO:CC	lytic vacuole
ExN	0.0344623	496	449	24	GO:0050769	GO:BP	positive regulation of neurogenesis
Astro	0.0344791	775	16	4	GO:0008285	GO:BP	negative regulation of cell population proliferation
Astro	0.0344791	109	16	2	GO:1905269	GO:BP	positive regulation of chromatin organization
InN	0.0345272	251	28	3	GO:0071216	GO:BP	cellular response to biotic stimulus
ExN	0.0346686	332	470	17	GO:1990351	GO:CC	transporter complex
ExN	0.0347828	303	449	17	GO:0050768	GO:BP	negative regulation of neurogenesis
ExN	0.0347995	584	449	27	GO:0007264	GO:BP	small GTPase mediated signal transduction
ExN	0.0347995	89	449	8	GO:0006029	GO:BP	proteoglycan metabolic process
ExN	0.0348105	3	449	2	GO:0045196	GO:BP	establishment or maintenance of neuroblast polarity
ExN	0.0348105	3	449	2	GO:1902722	GO:BP	positive regulation of prolactin secretion
ExN	0.0348105	3	449	2	GO:1990962	GO:BP	xenobiotic transport across blood-brain barrier
ExN	0.0348105	3	449	2	GO:0044467	GO:BP	glial cell-derived neurotrophic factor secretion
ExN	0.0348105	3	449	2	GO:1900166	GO:BP	regulation of glial cell-derived neurotrophic factor secretion
ExN	0.0348105	3	449	2	GO:1904048	GO:BP	regulation of spontaneous neurotransmitter secretion
ExN	0.0348105	3	449	2	GO:1900168	GO:BP	positive regulation of glial cell-derived neurotrophic factor secretion
ExN	0.0348105	1143	449	45	GO:0035295	GO:BP	tube development
ExN	0.0348105	3	449	2	GO:0060278	GO:BP	regulation of ovulation
ExN	0.0348105	3	449	2	GO:0045200	GO:BP	establishment of neuroblast polarity
ExN	0.0348105	3	449	2	GO:0019276	GO:BP	UDP-N-acetylgalactosamine metabolic process
ExN	0.0348105	498	449	24	GO:0016049	GO:BP	cell growth
ExN	0.0348105	3	449	2	GO:0060978	GO:BP	angiogenesis involved in coronary vascular morphogenesis
ExN	0.0348105	3244	449	106	GO:0009966	GO:BP	regulation of signal transduction
Astro	0.0348938	5	16	1	GO:1903596	GO:BP	regulation of gap junction assembly
Astro	0.0348938	5	16	1	GO:2000554	GO:BP	regulation of T-helper 1 cell cytokine production
Astro	0.0348938	113	16	2	GO:1904659	GO:BP	glucose transmembrane transport
Astro	0.0348938	5	16	1	GO:2000556	GO:BP	positive regulation of T-helper 1 cell cytokine production
Astro	0.0348938	4156	16	9	GO:0065008	GO:BP	regulation of biological quality
Astro	0.0348938	5	16	1	GO:2000660	GO:BP	negative regulation of interleukin-1-mediated signaling pathway
Astro	0.0348938	5	16	1	GO:0070487	GO:BP	monocyte aggregation
Astro	0.0348938	5	16	1	GO:1902512	GO:BP	positive regulation of apoptotic DNA fragmentation
Astro	0.0348938	111	16	2	GO:0002526	GO:BP	acute inflammatory response
Astro	0.0348938	5	16	1	GO:0014805	GO:BP	smooth muscle adaptation
Astro	0.0348938	5	16	1	GO:0046069	GO:BP	cGMP catabolic process
Astro	0.0348938	5	16	1	GO:0046136	GO:BP	positive regulation of vitamin metabolic process
InN	0.0351921	253	28	3	GO:0048872	GO:BP	homeostasis of number of cells
InN	0.0353106	60	28	2	GO:0101003	GO:CC	ficolin-1-rich granule membrane
InN	0.0353813	6481	28	17	GO:0016043	GO:BP	cellular component organization
InN	0.0353813	254	28	3	GO:0051402	GO:BP	neuron apoptotic process
ExN	0.0353859	225	470	13	GO:0034703	GO:CC	cation channel complex
Oligo	0.0354634	51	36	2	GO:0015459	GO:MF	potassium channel regulator activity
Oligo	0.0354634	1068	36	7	GO:0022857	GO:MF	transmembrane transporter activity
InN	0.0356735	796	28	5	GO:1903530	GO:BP	regulation of secretion by cell
ExN	0.0358442	500	449	24	GO:0070838	GO:BP	divalent metal ion transport
ExN	0.0358442	36	449	5	GO:2000310	GO:BP	regulation of NMDA receptor activity
ExN	0.0358442	36	449	5	GO:0021988	GO:BP	olfactory lobe development
ExN	0.0358658	334	470	17	GO:0098589	GO:CC	membrane region
Astro	0.0359537	149	9	2	KEGG:04932	KEGG	Non-alcoholic fatty liver disease (NAFLD)
ExN	0.0359957	14	470	3	GO:0099523	GO:CC	presynaptic cytosol
ExN	0.0361354	1051	449	42	GO:0019637	GO:BP	organophosphate metabolic process
InN	0.0361362	799	28	5	GO:0019221	GO:BP	cytokine-mediated signaling pathway
ExN	0.0361949	132	226	11	KEGG:04270	KEGG	Vascular smooth muscle contraction
Astro	0.0363915	116	16	2	GO:0008645	GO:BP	hexose transmembrane transport
Astro	0.0363915	116	16	2	GO:0046822	GO:BP	regulation of nucleocytoplasmic transport
Astro	0.0365754	393	16	3	GO:0045765	GO:BP	regulation of angiogenesis
InN	0.0366211	83	28	2	GO:0046470	GO:BP	phosphatidylcholine metabolic process
InN	0.0366791	259	28	3	GO:0045637	GO:BP	regulation of myeloid cell differentiation
InN	0.0366791	5	28	1	GO:0002238	GO:BP	response to molecule of fungal origin
InN	0.0366791	5	28	1	GO:0010916	GO:BP	negative regulation of very-low-density lipoprotein particle clearance
InN	0.0366791	260	28	3	GO:0050730	GO:BP	regulation of peptidyl-tyrosine phosphorylation
InN	0.0366791	2813	28	10	GO:0071310	GO:BP	cellular response to organic substance
InN	0.0366791	5	28	1	GO:0015825	GO:BP	L-serine transport
InN	0.0366791	5	28	1	GO:0014805	GO:BP	smooth muscle adaptation
InN	0.0366791	509	28	4	GO:0051249	GO:BP	regulation of lymphocyte activation
InN	0.0366791	5	28	1	GO:2001206	GO:BP	positive regulation of osteoclast development
InN	0.0366791	5	28	1	GO:0034239	GO:BP	regulation of macrophage fusion
InN	0.0366791	5	28	1	GO:2001199	GO:BP	negative regulation of dendritic cell differentiation
InN	0.0366791	5	28	1	GO:0034241	GO:BP	positive regulation of macrophage fusion
InN	0.0366791	5	28	1	GO:2000416	GO:BP	regulation of eosinophil migration
InN	0.0366791	5	28	1	GO:1905076	GO:BP	regulation of interleukin-17 secretion
InN	0.0366791	5	28	1	GO:1902564	GO:BP	negative regulation of neutrophil activation
InN	0.0366791	5	28	1	GO:0045081	GO:BP	negative regulation of interleukin-10 biosynthetic process
InN	0.0366791	5	28	1	GO:0032911	GO:BP	negative regulation of transforming growth factor beta1 production
InN	0.0366791	84	28	2	GO:0042509	GO:BP	regulation of tyrosine phosphorylation of STAT protein
ExN	0.0367267	22	449	4	GO:1903861	GO:BP	positive regulation of dendrite extension
ExN	0.0367267	180	449	12	GO:0021543	GO:BP	pallium development
ExN	0.0367267	22	449	4	GO:0050802	GO:BP	circadian sleep/wake cycle, sleep
InN	0.0372031	86	28	2	GO:0007260	GO:BP	tyrosine phosphorylation of STAT protein
InN	0.0372031	86	28	2	GO:0140029	GO:BP	exocytic process
ExN	0.0372689	281	449	16	GO:0061448	GO:BP	connective tissue development
ExN	0.0372689	134	449	10	GO:0001508	GO:BP	action potential
Astro	0.0372877	118	16	2	GO:0015749	GO:BP	monosaccharide transmembrane transport
ExN	0.0374404	1848	466	68	GO:0035639	GO:MF	purine ribonucleoside triphosphate binding
ExN	0.0375542	205	449	13	GO:0007626	GO:BP	locomotory behavior
ExN	0.0383313	562	449	26	GO:0007423	GO:BP	sensory organ development
Astro	0.0383566	120	16	2	GO:0034219	GO:BP	carbohydrate transmembrane transport
Oligo	0.038415	54	36	2	GO:0005544	GO:MF	calcium-dependent phospholipid binding
Oligo	0.038424	172	36	3	GO:0099240	GO:CC	intrinsic component of synaptic membrane
Astro	0.0385075	820	16	4	GO:0001944	GO:BP	vasculature development
Astro	0.0385075	829	16	4	GO:0072358	GO:BP	cardiovascular system development
Astro	0.0385075	6	16	1	GO:0031394	GO:BP	positive regulation of prostaglandin biosynthetic process
Astro	0.0385075	6	16	1	GO:1903626	GO:BP	positive regulation of DNA catabolic process
Astro	0.0385075	6	16	1	GO:0071389	GO:BP	cellular response to mineralocorticoid stimulus
Astro	0.0385075	6	16	1	GO:0060426	GO:BP	lung vasculature development
Astro	0.0385075	6	16	1	GO:0010754	GO:BP	negative regulation of cGMP-mediated signaling
Astro	0.0385075	6	16	1	GO:0070162	GO:BP	adiponectin secretion
Astro	0.0385075	123	16	2	GO:0042035	GO:BP	regulation of cytokine biosynthetic process
Astro	0.0385075	1358	16	5	GO:0051241	GO:BP	negative regulation of multicellular organismal process
Astro	0.0385075	6	16	1	GO:0070163	GO:BP	regulation of adiponectin secretion
Astro	0.0385075	6	16	1	GO:0031547	GO:BP	brain-derived neurotrophic factor receptor signaling pathway
Astro	0.0385075	823	16	4	GO:0060341	GO:BP	regulation of cellular localization
Astro	0.0385075	3421	16	8	GO:0010033	GO:BP	response to organic substance
Oligo	0.0386085	55	36	2	GO:0005080	GO:MF	protein kinase C binding
InN	0.0386556	520	28	4	GO:0090066	GO:BP	regulation of anatomical structure size
ExN	0.0388213	72	449	7	GO:0033692	GO:BP	cellular polysaccharide biosynthetic process
ExN	0.0388213	206	449	13	GO:0007266	GO:BP	Rho protein signal transduction
ExN	0.0390622	92	449	8	GO:0014909	GO:BP	smooth muscle cell migration
ExN	0.0390622	37	449	5	GO:0051954	GO:BP	positive regulation of amine transport
InN	0.0393434	4335	28	13	GO:0030154	GO:BP	cell differentiation
ExN	0.0394687	11	449	3	GO:1902946	GO:BP	protein localization to early endosome
ExN	0.0394687	11	449	3	GO:0044557	GO:BP	relaxation of smooth muscle
ExN	0.0394687	11	449	3	GO:0014820	GO:BP	tonic smooth muscle contraction
Astro	0.0395375	126	16	2	GO:0002705	GO:BP	positive regulation of leukocyte mediated immunity
ExN	0.0397811	654	449	29	GO:0006820	GO:BP	anion transport
InN	0.0398241	3	28	1	GO:0032997	GO:CC	Fc receptor complex
InN	0.0398241	3	28	1	GO:0032998	GO:CC	Fc-epsilon receptor I complex
InN	0.0398461	272	28	3	GO:0051260	GO:BP	protein homooligomerization
ExN	0.0399871	284	449	16	GO:0007411	GO:BP	axon guidance
InN	0.0400938	90	28	2	GO:0014068	GO:BP	positive regulation of phosphatidylinositol 3-kinase signaling
InN	0.0400938	90	28	2	GO:0032760	GO:BP	positive regulation of tumor necrosis factor production
Astro	0.0401881	418	16	3	GO:0000280	GO:BP	nuclear division
ExN	0.0403446	507	449	24	GO:0072511	GO:BP	divalent inorganic cation transport
ExN	0.0403446	114	449	9	GO:0021761	GO:BP	limbic system development
Oligo	0.0404437	1634	34	10	GO:0055085	GO:BP	transmembrane transport
Oligo	0.0406081	3	36	1	GO:0008426	GO:MF	protein kinase C inhibitor activity
Oligo	0.0406081	3	36	1	GO:0099508	GO:MF	voltage-gated ion channel activity involved in regulation of presynaptic membrane potential
ExN	0.0407304	73	449	7	GO:0060350	GO:BP	endochondral bone morphogenesis
ExN	0.0409397	537	449	25	GO:0045860	GO:BP	positive regulation of protein kinase activity
Oligo	0.0410248	21	34	2	GO:0016048	GO:BP	detection of temperature stimulus
Oligo	0.0410248	92	34	3	GO:1901379	GO:BP	regulation of potassium ion transmembrane transport
Oligo	0.0410548	3	36	1	GO:0098855	GO:CC	HCN channel complex
Oligo	0.0410548	624	36	5	GO:0097447	GO:CC	dendritic tree
Oligo	0.0410548	390	36	4	GO:0097060	GO:CC	synaptic membrane
Oligo	0.0410548	592	36	5	GO:0044297	GO:CC	cell body
Oligo	0.0410548	61	36	2	GO:0032589	GO:CC	neuron projection membrane
Oligo	0.0410548	863	36	6	GO:0036477	GO:CC	somatodendritic compartment
Oligo	0.0410548	57	36	2	GO:0043195	GO:CC	terminal bouton
Oligo	0.0410548	622	36	5	GO:0030425	GO:CC	dendrite
Astro	0.0410949	422	16	3	GO:0045785	GO:BP	positive regulation of cell adhesion
InN	0.0411108	4897	28	14	GO:0042221	GO:BP	response to chemical
Oligo	0.0411723	94	34	3	GO:0051952	GO:BP	regulation of amine transport
Astro	0.0414977	134	16	2	GO:0042107	GO:BP	cytokine metabolic process
Astro	0.0414977	133	16	2	GO:0042089	GO:BP	cytokine biosynthetic process
Astro	0.0414977	7	16	1	GO:0060462	GO:BP	lung lobe development
Astro	0.0414977	7	16	1	GO:0060463	GO:BP	lung lobe morphogenesis
Astro	0.0414977	7	16	1	GO:2000659	GO:BP	regulation of interleukin-1-mediated signaling pathway
Astro	0.0414977	7	16	1	GO:0072307	GO:BP	regulation of metanephric nephron tubule epithelial cell differentiation
Astro	0.0414977	7	16	1	GO:0072257	GO:BP	metanephric nephron tubule epithelial cell differentiation
Astro	0.0414977	7	16	1	GO:0060558	GO:BP	regulation of calcidiol 1-monooxygenase activity
Astro	0.0414977	4335	16	9	GO:0030154	GO:BP	cell differentiation
Astro	0.0414977	7	16	1	GO:0031622	GO:BP	positive regulation of fever generation
Astro	0.0414977	7	16	1	GO:0035234	GO:BP	ectopic germ cell programmed cell death
Astro	0.0414977	2744	16	7	GO:0032268	GO:BP	regulation of cellular protein metabolic process
Astro	0.0414977	1409	16	5	GO:0030182	GO:BP	neuron differentiation
Astro	0.0414977	7	16	1	GO:2000553	GO:BP	positive regulation of T-helper 2 cell cytokine production
Astro	0.0414977	7	16	1	GO:0042940	GO:BP	D-amino acid transport
Astro	0.0414977	2038	16	6	GO:0008283	GO:BP	cell population proliferation
Astro	0.0414977	132	16	2	GO:0046717	GO:BP	acid secretion
Astro	0.0414977	432	16	3	GO:0051222	GO:BP	positive regulation of protein transport
ExN	0.0415048	3	466	2	GO:0016909	GO:MF	SAP kinase activity
ExN	0.0415048	3	466	2	GO:0140333	GO:MF	glycerophospholipid flippase activity
ExN	0.0415048	3	466	2	GO:0047237	GO:MF	glucuronylgalactosylproteoglycan 4-beta-N-acetylgalactosaminyltransferase activity
ExN	0.0415048	3	466	2	GO:2001070	GO:MF	starch binding
ExN	0.0415048	3	466	2	GO:0004937	GO:MF	alpha1-adrenergic receptor activity
ExN	0.0415048	3	466	2	GO:0004705	GO:MF	JUN kinase activity
ExN	0.041589	137	449	10	GO:1903825	GO:BP	organic acid transmembrane transport
ExN	0.041589	137	449	10	GO:1905039	GO:BP	carboxylic acid transmembrane transport
InN	0.041614	92	28	2	GO:1903557	GO:BP	positive regulation of tumor necrosis factor superfamily cytokine production
Astro	0.0417122	436	16	3	GO:1901342	GO:BP	regulation of vasculature development
Oligo	0.0418289	1085	34	8	GO:0010243	GO:BP	response to organonitrogen compound
ExN	0.0418473	1457	449	54	GO:0051094	GO:BP	positive regulation of developmental process
ExN	0.0418473	286	449	16	GO:0097485	GO:BP	neuron projection guidance
ExN	0.0418744	115	449	9	GO:0005976	GO:BP	polysaccharide metabolic process
ExN	0.0419161	260	449	15	GO:0050730	GO:BP	regulation of peptidyl-tyrosine phosphorylation
InN	0.0419209	6	28	1	GO:0072719	GO:BP	cellular response to cisplatin
InN	0.0419209	93	28	2	GO:0032755	GO:BP	positive regulation of interleukin-6 production
InN	0.0419209	6	28	1	GO:0002924	GO:BP	negative regulation of humoral immune response mediated by circulating immunoglobulin
InN	0.0419209	6	28	1	GO:0010915	GO:BP	regulation of very-low-density lipoprotein particle clearance
InN	0.0419209	1194	28	6	GO:0022603	GO:BP	regulation of anatomical structure morphogenesis
InN	0.0419209	6	28	1	GO:0002322	GO:BP	B cell proliferation involved in immune response
InN	0.0419209	6	28	1	GO:0035502	GO:BP	metanephric part of ureteric bud development
InN	0.0419209	6	28	1	GO:0034238	GO:BP	macrophage fusion
InN	0.0419209	2889	28	10	GO:0051641	GO:BP	cellular localization
InN	0.0419209	6	28	1	GO:0046469	GO:BP	platelet activating factor metabolic process
InN	0.0419209	279	28	3	GO:0110053	GO:BP	regulation of actin filament organization
ExN	0.0419276	38	449	5	GO:0061462	GO:BP	protein localization to lysosome
ExN	0.0419276	55	449	6	GO:0140115	GO:BP	export across plasma membrane
Astro	0.0420004	136	16	2	GO:0050671	GO:BP	positive regulation of lymphocyte proliferation
ExN	0.0421274	97	226	9	KEGG:05017	KEGG	Spinocerebellar ataxia
ExN	0.0422025	94	449	8	GO:0051952	GO:BP	regulation of amine transport
Astro	0.0424385	137	16	2	GO:0032946	GO:BP	positive regulation of mononuclear cell proliferation
ExN	0.0426078	176	466	12	GO:0017048	GO:MF	Rho GTPase binding
Astro	0.042923	167	9	2	KEGG:05164	KEGG	Influenza A
ExN	0.0436249	15	470	3	GO:0099059	GO:CC	integral component of presynaptic active zone membrane
InN	0.0436966	6667	28	17	GO:0071840	GO:BP	cellular component organization or biogenesis
Astro	0.043739	8	16	1	GO:0001781	GO:BP	neutrophil apoptotic process
Astro	0.043739	8	16	1	GO:0003339	GO:BP	regulation of mesenchymal to epithelial transition involved in metanephros morphogenesis
Astro	0.043739	8	16	1	GO:0090091	GO:BP	positive regulation of extracellular matrix disassembly
Astro	0.043739	8	16	1	GO:2001280	GO:BP	positive regulation of unsaturated fatty acid biosynthetic process
Astro	0.043739	8	16	1	GO:0031620	GO:BP	regulation of fever generation
Astro	0.043739	8	16	1	GO:2000698	GO:BP	positive regulation of epithelial cell differentiation involved in kidney development
Astro	0.043739	143	16	2	GO:0046425	GO:BP	regulation of receptor signaling pathway via JAK-STAT
Astro	0.043739	143	16	2	GO:0072073	GO:BP	kidney epithelium development
Astro	0.043739	144	16	2	GO:0033135	GO:BP	regulation of peptidyl-serine phosphorylation
Astro	0.043739	8	16	1	GO:0033129	GO:BP	positive regulation of histone phosphorylation
Astro	0.043739	4421	16	9	GO:0048583	GO:BP	regulation of response to stimulus
Astro	0.043739	142	16	2	GO:0001837	GO:BP	epithelial to mesenchymal transition
Astro	0.043739	8	16	1	GO:0033084	GO:BP	regulation of immature T cell proliferation in thymus
Astro	0.043739	8	16	1	GO:0035744	GO:BP	T-helper 1 cell cytokine production
Astro	0.043739	144	16	2	GO:0002706	GO:BP	regulation of lymphocyte mediated immunity
Astro	0.043739	8	16	1	GO:1904714	GO:BP	regulation of chaperone-mediated autophagy
Astro	0.043739	144	16	2	GO:0002822	GO:BP	regulation of adaptive immune response based on somatic recombination of immune receptors built from immunoglobulin superfamily domains
Astro	0.043739	8	16	1	GO:0061888	GO:BP	regulation of astrocyte activation
InN	0.043772	2010	28	8	GO:0040011	GO:BP	locomotion
ExN	0.0439645	454	449	22	GO:0006816	GO:BP	calcium ion transport
Astro	0.0440144	145	16	2	GO:0070665	GO:BP	positive regulation of leukocyte proliferation
Astro	0.0440144	145	16	2	GO:0002700	GO:BP	regulation of production of molecular mediator of immune response
Astro	0.0442854	2820	16	7	GO:0009653	GO:BP	anatomical structure morphogenesis
Astro	0.0443931	175	9	2	KEGG:05152	KEGG	Tuberculosis
Astro	0.0443931	177	9	2	KEGG:04621	KEGG	NOD-like receptor signaling pathway
InN	0.0444915	97	28	2	GO:0002824	GO:BP	positive regulation of adaptive immune response based on somatic recombination of immune receptors built from immunoglobulin superfamily domains
ExN	0.0448298	95	449	8	GO:0048814	GO:BP	regulation of dendrite morphogenesis
Astro	0.045	136	17	3	GO:0070851	GO:MF	growth factor receptor binding
Astro	0.0450932	463	16	3	GO:0048285	GO:BP	organelle fission
InN	0.0451545	98	28	2	GO:0002708	GO:BP	positive regulation of lymphocyte mediated immunity
InN	0.0451545	290	28	3	GO:0051258	GO:BP	protein polymerization
Astro	0.0453092	148	16	2	GO:0042542	GO:BP	response to hydrogen peroxide
ExN	0.045439	56	449	6	GO:0061098	GO:BP	positive regulation of protein tyrosine kinase activity
Astro	0.0454518	2118	16	6	GO:0009888	GO:BP	tissue development
ExN	0.045473	693	449	30	GO:0097435	GO:BP	supramolecular fiber organization
InN	0.0454825	780	28	5	GO:0030659	GO:CC	cytoplasmic vesicle membrane
Astro	0.0455831	149	16	2	GO:0007612	GO:BP	learning
Astro	0.0455972	475	16	3	GO:0023061	GO:BP	signal release
Astro	0.0455972	151	16	2	GO:1902107	GO:BP	positive regulation of leukocyte differentiation
Astro	0.0455972	152	16	2	GO:1904892	GO:BP	regulation of receptor signaling pathway via STAT
Astro	0.0455972	9	16	1	GO:0099545	GO:BP	trans-synaptic signaling by trans-synaptic complex
Astro	0.0455972	9	16	1	GO:0010624	GO:BP	regulation of Schwann cell proliferation
Astro	0.0455972	9	16	1	GO:0060556	GO:BP	regulation of vitamin D biosynthetic process
Astro	0.0455972	9	16	1	GO:0060353	GO:BP	regulation of cell adhesion molecule production
Astro	0.0455972	9	16	1	GO:0070091	GO:BP	glucagon secretion
Astro	0.0455972	9	16	1	GO:0033080	GO:BP	immature T cell proliferation in thymus
Astro	0.0455972	9	16	1	GO:2000674	GO:BP	regulation of type B pancreatic cell apoptotic process
Astro	0.0455972	9	16	1	GO:0060020	GO:BP	Bergmann glial cell differentiation
Astro	0.0455972	9	16	1	GO:0045743	GO:BP	positive regulation of fibroblast growth factor receptor signaling pathway
Astro	0.0455972	150	16	2	GO:0051384	GO:BP	response to glucocorticoid
Astro	0.0455972	470	16	3	GO:1904951	GO:BP	positive regulation of establishment of protein localization
Astro	0.0455972	153	16	2	GO:0050729	GO:BP	positive regulation of inflammatory response
Astro	0.0457719	4531	16	9	GO:0048869	GO:BP	cellular developmental process
InN	0.0458263	3418	28	11	GO:0070887	GO:BP	cellular response to chemical stimulus
InN	0.0458263	7	28	1	GO:0043307	GO:BP	eosinophil activation
InN	0.0458263	7	28	1	GO:0050725	GO:BP	positive regulation of interleukin-1 beta biosynthetic process
InN	0.0458263	7	28	1	GO:0060696	GO:BP	regulation of phospholipid catabolic process
InN	0.0458263	7	28	1	GO:0051005	GO:BP	negative regulation of lipoprotein lipase activity
InN	0.0458263	7	28	1	GO:0072615	GO:BP	interleukin-17 secretion
InN	0.0458263	7	28	1	GO:0002441	GO:BP	histamine secretion involved in inflammatory response
InN	0.0458263	100	28	2	GO:1901216	GO:BP	positive regulation of neuron death
InN	0.0458263	101	28	2	GO:0001909	GO:BP	leukocyte mediated cytotoxicity
InN	0.0458263	7	28	1	GO:0042167	GO:BP	heme catabolic process
InN	0.0458263	7	28	1	GO:0002246	GO:BP	wound healing involved in inflammatory response
InN	0.0458263	7	28	1	GO:0002349	GO:BP	histamine production involved in inflammatory response
InN	0.0458263	7	28	1	GO:0045362	GO:BP	positive regulation of interleukin-1 biosynthetic process
InN	0.0458263	7	28	1	GO:0046149	GO:BP	pigment catabolic process
InN	0.0458263	7	28	1	GO:0006868	GO:BP	glutamine transport
InN	0.0458263	7	28	1	GO:0006787	GO:BP	porphyrin-containing compound catabolic process
InN	0.0458263	101	28	2	GO:0030593	GO:BP	neutrophil chemotaxis
InN	0.0458263	7	28	1	GO:0002553	GO:BP	histamine secretion by mast cell
InN	0.0458263	3421	28	11	GO:0010033	GO:BP	response to organic substance
InN	0.0458263	7	28	1	GO:0033015	GO:BP	tetrapyrrole catabolic process
InN	0.0458263	7	28	1	GO:0032329	GO:BP	serine transport
Astro	0.0458704	154	16	2	GO:0008643	GO:BP	carbohydrate transport
ExN	0.0461652	39	449	5	GO:1901068	GO:BP	guanosine-containing compound metabolic process
InN	0.0461704	102	28	2	GO:0030316	GO:BP	osteoclast differentiation
InN	0.0461704	102	28	2	GO:0002821	GO:BP	positive regulation of adaptive immune response
ExN	0.0462099	24	449	4	GO:1903859	GO:BP	regulation of dendrite extension
ExN	0.0462099	24	449	4	GO:0021544	GO:BP	subpallium development
Astro	0.0463039	6481	16	11	GO:0016043	GO:BP	cellular component organization
ExN	0.0463219	87	470	7	GO:0098685	GO:CC	Schaffer collateral - CA1 synapse
ExN	0.0463407	155	466	11	GO:0015081	GO:MF	sodium ion transmembrane transporter activity
ExN	0.0464368	756	449	32	GO:0043408	GO:BP	regulation of MAPK cascade
InN	0.0466147	801	28	5	GO:0012506	GO:CC	vesicle membrane
InN	0.0466147	797	28	5	GO:0005773	GO:CC	vacuole
Astro	0.0467183	156	16	2	GO:0010977	GO:BP	negative regulation of neuron projection development
InN	0.0469316	103	28	2	GO:0030838	GO:BP	positive regulation of actin filament polymerization
InN	0.0470419	80	28	2	GO:0005901	GO:CC	caveola
InN	0.04705	301	28	3	GO:0002440	GO:BP	production of molecular mediator of immune response
Astro	0.0471429	157	16	2	GO:0016573	GO:BP	histone acetylation
Astro	0.0475681	158	16	2	GO:0090316	GO:BP	positive regulation of intracellular protein transport
InN	0.0475876	104	28	2	GO:0031532	GO:BP	actin cytoskeleton reorganization
Astro	0.0476157	10	16	1	GO:0097050	GO:BP	type B pancreatic cell apoptotic process
Astro	0.0476157	10	16	1	GO:0033083	GO:BP	regulation of immature T cell proliferation
Astro	0.0476157	10	16	1	GO:0006198	GO:BP	cAMP catabolic process
Astro	0.0476157	159	16	2	GO:0002819	GO:BP	regulation of adaptive immune response
Astro	0.0476157	160	16	2	GO:0031056	GO:BP	regulation of histone modification
Astro	0.0476157	159	16	2	GO:0032675	GO:BP	regulation of interleukin-6 production
Astro	0.0476157	490	16	3	GO:0048871	GO:BP	multicellular organismal homeostasis
Astro	0.0476157	10	16	1	GO:0048671	GO:BP	negative regulation of collateral sprouting
Astro	0.0476157	10	16	1	GO:0032308	GO:BP	positive regulation of prostaglandin secretion
Astro	0.0476157	161	16	2	GO:0018393	GO:BP	internal peptidyl-lysine acetylation
Astro	0.0476157	10	16	1	GO:0001660	GO:BP	fever generation
Astro	0.0476157	10	16	1	GO:0007614	GO:BP	short-term memory
Oligo	0.0476515	101	34	3	GO:0015837	GO:BP	amine transport
ExN	0.0477453	1876	449	66	GO:1902531	GO:BP	regulation of intracellular signal transduction
ExN	0.0477589	12	449	3	GO:0097104	GO:BP	postsynaptic membrane assembly
ExN	0.0477589	978	449	39	GO:0030334	GO:BP	regulation of cell migration
ExN	0.0480043	76	449	7	GO:0051881	GO:BP	regulation of mitochondrial membrane potential
ExN	0.048158	1206	449	46	GO:0048646	GO:BP	anatomical structure formation involved in morphogenesis
ExN	0.048158	697	449	30	GO:0048514	GO:BP	blood vessel morphogenesis
ExN	0.048158	1371	449	51	GO:0007010	GO:BP	cytoskeleton organization
ExN	0.048158	141	449	10	GO:0030010	GO:BP	establishment of cell polarity
ExN	0.0481608	1076	449	42	GO:0007167	GO:BP	enzyme linked receptor protein signaling pathway
InN	0.0483612	6772	28	17	GO:0023052	GO:BP	signaling
Oligo	0.0486522	201	36	3	GO:0005516	GO:MF	calmodulin binding
Astro	0.0487361	969	16	4	GO:0008284	GO:BP	positive regulation of cell population proliferation
Astro	0.0487361	164	16	2	GO:0007259	GO:BP	receptor signaling pathway via JAK-STAT
Astro	0.0487361	164	16	2	GO:1905952	GO:BP	regulation of lipid localization
InN	0.0490139	106	28	2	GO:1902106	GO:BP	negative regulation of leukocyte differentiation
InN	0.0490139	106	28	2	GO:0097006	GO:BP	regulation of plasma lipoprotein particle levels
InN	0.0490562	517	28	4	GO:0015629	GO:CC	actin cytoskeleton
ExN	0.0490811	240	449	14	GO:0048588	GO:BP	developmental cell growth
Astro	0.0491567	165	16	2	GO:0050806	GO:BP	positive regulation of synaptic transmission
Astro	0.0492846	169	16	2	GO:0018394	GO:BP	peptidyl-lysine acetylation
Astro	0.0492846	11	16	1	GO:0032306	GO:BP	regulation of prostaglandin secretion
Astro	0.0492846	11	16	1	GO:0033079	GO:BP	immature T cell proliferation
Astro	0.0492846	11	16	1	GO:0035633	GO:BP	maintenance of permeability of blood-brain barrier
Astro	0.0492846	167	16	2	GO:0031960	GO:BP	response to corticosteroid
Astro	0.0492846	11	16	1	GO:2000551	GO:BP	regulation of T-helper 2 cell cytokine production
Astro	0.0492846	11	16	1	GO:0014010	GO:BP	Schwann cell proliferation
Astro	0.0492846	11	16	1	GO:0046886	GO:BP	positive regulation of hormone biosynthetic process
Astro	0.0492846	11	16	1	GO:0031652	GO:BP	positive regulation of heat generation
Astro	0.0492846	169	16	2	GO:0032635	GO:BP	interleukin-6 production
Astro	0.0492846	11	16	1	GO:0051024	GO:BP	positive regulation of immunoglobulin secretion
Astro	0.0492846	11	16	1	GO:0003334	GO:BP	keratinocyte development
Astro	0.0492846	166	16	2	GO:0051302	GO:BP	regulation of cell division
Astro	0.0492846	167	16	2	GO:0042129	GO:BP	regulation of T cell proliferation
Astro	0.0492846	11	16	1	GO:0060352	GO:BP	cell adhesion molecule production
Astro	0.0492846	166	16	2	GO:0006475	GO:BP	internal protein amino acid acetylation
InN	0.0496743	107	28	2	GO:0033138	GO:BP	positive regulation of peptidyl-serine phosphorylation
InN	0.0496743	107	28	2	GO:0015696	GO:BP	ammonium transport
ExN	0.0497597	669	449	29	GO:1901137	GO:BP	carbohydrate derivative biosynthetic process
ExN	0.0497597	142	449	10	GO:0060048	GO:BP	cardiac muscle contraction
ExN	0.0497597	215	449	13	GO:0030073	GO:BP	insulin secretion
Oligo	0.0498215	4	36	1	GO:0086089	GO:MF	voltage-gated potassium channel activity involved in atrial cardiac muscle cell action potential repolarization
Oligo	0.0498215	4	36	1	GO:0015467	GO:MF	G-protein activated inward rectifier potassium channel activity
InN	0.049893	6798	28	17	GO:0007154	GO:BP	cell communication

## Sheet: GO-AD
query	q_value	term_size	query_size	intersection_size	term_id	source	term_name
MSBB.ExN	8.12546e-65	14626	2975	2648	GO:0005622	GO:CC	intracellular
MSBB.ExN	3.21534e-51	12743	2968	2427	GO:0005515	GO:MF	protein binding
MSBB.ExN	6.33954e-46	13720	2975	2478	GO:0043226	GO:CC	organelle
MSBB.ExN	4.35858e-44	12840	2975	2350	GO:0043229	GO:CC	intracellular organelle
MSBB.ExN	7.67845e-43	12584	2975	2309	GO:0043227	GO:CC	membrane-bounded organelle
MSBB.ExN	1.30144e-41	11634	2975	2167	GO:0005737	GO:CC	cytoplasm
MSBB.ExN	7.73064e-39	4012	2975	918	GO:0005654	GO:CC	nucleoplasm
MSBB.ExN	3.03663e-37	11067	2975	2065	GO:0043231	GO:CC	intracellular membrane-bounded organelle
MSBB.ExN	3.42637e-36	5154	2975	1109	GO:0005829	GO:CC	cytosol
MSBB.ExN	1.01331e-31	7486	2975	1480	GO:0005634	GO:CC	nucleus
MSBB.ExN	1.975e-30	4780	2975	1019	GO:0031981	GO:CC	nuclear lumen
MSBB.ExN	5.36094e-29	6481	2883	1329	GO:0016043	GO:BP	cellular component organization
MSBB.ExN	5.36094e-29	6667	2883	1359	GO:0071840	GO:BP	cellular component organization or biogenesis
Mayo.Astro	3.21561e-28	1362	315	90	GO:0045202	GO:CC	synapse
Mayo.ExN	7.95641e-27	1362	1314	211	GO:0045202	GO:CC	synapse
MSBB.ExN	1.42269e-23	2246	2968	551	GO:0019899	GO:MF	enzyme binding
Mayo.Astro	2.97882e-23	638	315	57	GO:0098794	GO:CC	postsynapse
Mayo.ExN	3.50648e-23	13720	1314	1111	GO:0043226	GO:CC	organelle
MSBB.ExN	5.70732e-23	5898	2975	1173	GO:0070013	GO:CC	intracellular organelle lumen
MSBB.ExN	5.70732e-23	5898	2975	1173	GO:0031974	GO:CC	membrane-enclosed lumen
MSBB.ExN	5.70732e-23	5898	2975	1173	GO:0043233	GO:CC	organelle lumen
MSBB.ExN	6.72013e-23	15944	2968	2770	GO:0005488	GO:MF	binding
MSBB.Oligo	1.03432e-22	407	512	58	GO:0062023	GO:CC	collagen-containing extracellular matrix
Mayo.ExN	1.55551e-22	14626	1314	1160	GO:0005622	GO:CC	intracellular
MSBB.Oligo	3.37404e-22	375	505	57	GO:0030198	GO:BP	extracellular matrix organization
MSBB.Oligo	3.37404e-22	376	505	57	GO:0043062	GO:BP	extracellular structure organization
MSBB.ExN	3.44471e-22	3966	2883	858	GO:0006996	GO:BP	organelle organization
MSBB.Oligo	4.37484e-22	534	512	65	GO:0031012	GO:CC	extracellular matrix
Mayo.ExN	1.30631e-21	12584	1314	1037	GO:0043227	GO:CC	membrane-bounded organelle
Mayo.Oligo	1.67843e-21	1362	1057	171	GO:0045202	GO:CC	synapse
Mayo.Astro	1.23869e-20	745	305	60	GO:0099536	GO:BP	synaptic signaling
MSBB.ExN	3.34772e-20	2432	2883	567	GO:0007399	GO:BP	nervous system development
Mayo.Astro	6.08249e-20	726	305	58	GO:0099537	GO:BP	trans-synaptic signaling
MSBB.ExN	8.12217e-20	4964	2975	998	GO:0043228	GO:CC	non-membrane-bounded organelle
Mayo.Oligo	8.70904e-20	11634	1057	797	GO:0005737	GO:CC	cytoplasm
Mayo.ExN	9.69846e-20	647	1314	117	GO:0030424	GO:CC	axon
Mayo.Astro	9.80483e-20	717	305	57	GO:0098916	GO:BP	anterograde trans-synaptic signaling
Mayo.Astro	9.80483e-20	717	305	57	GO:0007268	GO:BP	chemical synaptic transmission
MSBB.ExN	1.98079e-19	4954	2975	994	GO:0043232	GO:CC	intracellular non-membrane-bounded organelle
MSBB.ExN	2.28253e-19	2288	2975	522	GO:0042995	GO:CC	cell projection
MSBB.Oligo	4.2102e-19	165	508	36	GO:0005201	GO:MF	extracellular matrix structural constituent
MSBB.Oligo	4.26058e-19	1447	505	110	GO:0022610	GO:BP	biological adhesion
Mayo.ExN	5.51416e-19	11634	1314	967	GO:0005737	GO:CC	cytoplasm
MSBB.ExN	7.34754e-19	1327	2975	336	GO:0030054	GO:CC	cell junction
Mayo.ExN	1.4831e-18	12840	1314	1041	GO:0043229	GO:CC	intracellular organelle
Mayo.Astro	1.99219e-18	863	315	59	GO:0036477	GO:CC	somatodendritic compartment
MSBB.Oligo	2.43601e-18	1440	505	108	GO:0007155	GO:BP	cell adhesion
MSBB.Oligo	2.79683e-18	2820	505	164	GO:0009653	GO:BP	anatomical structure morphogenesis
Mayo.Astro	4.09765e-18	370	315	39	GO:0099572	GO:CC	postsynaptic specialization
ROSMAP.ExN	4.53363e-18	14626	820	737	GO:0005622	GO:CC	intracellular
MSBB.ExN	6.90704e-18	2200	2975	499	GO:0120025	GO:CC	plasma membrane bounded cell projection
Mayo.Astro	8.53127e-18	1376	315	74	GO:0043005	GO:CC	neuron projection
MSBB.Oligo	1.28205e-17	1194	505	95	GO:0072359	GO:BP	circulatory system development
MSBB.ExN	1.31852e-17	991	2968	274	GO:0008092	GO:MF	cytoskeletal protein binding
Mayo.Astro	1.7744e-17	390	315	39	GO:0097060	GO:CC	synaptic membrane
MSBB.Oligo	2.72409e-17	784	505	74	GO:0001568	GO:BP	blood vessel development
MSBB.Oligo	3.89662e-17	697	505	69	GO:0048514	GO:BP	blood vessel morphogenesis
Mayo.ExN	3.90139e-17	531	1314	98	GO:0098793	GO:CC	presynapse
Mayo.ExN	4.91573e-17	5154	1314	502	GO:0005829	GO:CC	cytosol
MSBB.ExN	5.27632e-17	1362	2975	336	GO:0045202	GO:CC	synapse
MSBB.Oligo	7.16821e-17	820	505	75	GO:0001944	GO:BP	vasculature development
MSBB.ExN	8.21198e-17	3679	2883	779	GO:0023051	GO:BP	regulation of signaling
Mayo.Astro	9.19232e-17	344	315	36	GO:0014069	GO:CC	postsynaptic density
Mayo.Astro	1.17611e-16	348	315	36	GO:0032279	GO:CC	asymmetric synapse
MSBB.Oligo	1.21444e-16	829	505	75	GO:0072358	GO:BP	cardiovascular system development
Mayo.Astro	1.27111e-16	372	315	37	GO:0098984	GO:CC	neuron to neuron synapse
MSBB.ExN	1.43819e-16	3638	2883	770	GO:0010646	GO:BP	regulation of cell communication
Mayo.Astro	1.60071e-16	622	315	47	GO:0030425	GO:CC	dendrite
Mayo.Astro	1.65374e-16	624	315	47	GO:0097447	GO:CC	dendritic tree
MSBB.ExN	1.70301e-16	2541	2883	570	GO:0051128	GO:BP	regulation of cellular component organization
MSBB.ExN	1.74323e-16	3000	2883	654	GO:0022607	GO:BP	cellular component assembly
MSBB.ExN	2.04663e-16	6393	2883	1243	GO:0031323	GO:BP	regulation of cellular metabolic process
MSBB.Oligo	2.20777e-16	5604	505	253	GO:0007275	GO:BP	multicellular organism development
MSBB.Oligo	2.9852e-16	6105	505	268	GO:0048856	GO:BP	anatomical structure development
MSBB.ExN	2.99008e-16	3241	2883	696	GO:0044085	GO:BP	cellular component biogenesis
Mayo.ExN	3.00755e-16	1376	1314	183	GO:0043005	GO:CC	neuron projection
MSBB.ExN	9.5414e-16	417	2975	135	GO:0031252	GO:CC	cell leading edge
Mayo.Astro	1.67149e-15	457	305	41	GO:0099177	GO:BP	regulation of trans-synaptic signaling
Mayo.Astro	1.67149e-15	456	305	41	GO:0050804	GO:BP	modulation of chemical synaptic transmission
Mayo.ExN	1.8153e-15	368	1314	75	GO:0098978	GO:CC	glutamatergic synapse
Mayo.Astro	1.92627e-15	1327	315	68	GO:0030054	GO:CC	cell junction
MSBB.ExN	2.10275e-15	1068	2883	280	GO:0000902	GO:BP	cell morphogenesis
MSBB.Oligo	3.18609e-15	5020	505	231	GO:0048731	GO:BP	system development
MSBB.ExN	5.01852e-15	1578	2883	380	GO:0030030	GO:BP	cell projection organization
Mayo.Astro	5.16123e-15	286	315	31	GO:0045211	GO:CC	postsynaptic membrane
MSBB.ExN	6.47191e-15	5605	2883	1100	GO:0048522	GO:BP	positive regulation of cellular process
MSBB.ExN	6.62496e-15	1177	2883	300	GO:0032989	GO:BP	cellular component morphogenesis
MSBB.ExN	8.37375e-15	3244	2883	688	GO:0009966	GO:BP	regulation of signal transduction
MSBB.ExN	8.37375e-15	1539	2883	371	GO:0120036	GO:BP	plasma membrane bounded cell projection organization
MSBB.ExN	1.04506e-14	4216	2883	859	GO:0006464	GO:BP	cellular protein modification process
MSBB.ExN	1.04506e-14	4216	2883	859	GO:0036211	GO:BP	protein modification process
MSBB.ExN	1.31452e-14	3415	2883	717	GO:0031325	GO:BP	positive regulation of cellular metabolic process
MSBB.ExN	1.46688e-14	6189	2883	1195	GO:0080090	GO:BP	regulation of primary metabolic process
MSBB.ExN	1.56847e-14	10860	2883	1948	GO:0044237	GO:BP	cellular metabolic process
MSBB.ExN	1.92336e-14	1679	2883	396	GO:0022008	GO:BP	neurogenesis
MSBB.ExN	2.01573e-14	2889	2883	621	GO:0051641	GO:BP	cellular localization
MSBB.ExN	2.20853e-14	2263	2975	494	GO:0005856	GO:CC	cytoskeleton
MSBB.Oligo	3.74936e-14	944	505	76	GO:0035239	GO:BP	tube morphogenesis
Mayo.ExN	4.05029e-14	11067	1314	908	GO:0043231	GO:CC	intracellular membrane-bounded organelle
MSBB.ExN	4.66924e-14	6009	2883	1161	GO:0051171	GO:BP	regulation of nitrogen compound metabolic process
MSBB.Oligo	4.85226e-14	1143	505	85	GO:0035295	GO:BP	tube development
Mayo.ExN	6.8373e-14	2288	1314	257	GO:0042995	GO:CC	cell projection
MSBB.ExN	7.16019e-14	1017	2883	263	GO:0031175	GO:BP	neuron projection development
Mayo.ExN	7.20515e-14	3531	1314	360	GO:0031090	GO:CC	organelle membrane
Mayo.Astro	8.11522e-14	2288	315	90	GO:0042995	GO:CC	cell projection
MSBB.ExN	9.70503e-14	8429	2883	1557	GO:0044260	GO:BP	cellular macromolecule metabolic process
MSBB.ExN	9.70503e-14	1371	2883	333	GO:0007010	GO:BP	cytoskeleton organization
MSBB.Oligo	9.91178e-14	6630	505	276	GO:0032502	GO:BP	developmental process
MSBB.ExN	9.97789e-14	3742	2883	769	GO:0009893	GO:BP	positive regulation of metabolic process
Mayo.ExN	1.14421e-13	717	1266	115	GO:0098916	GO:BP	anterograde trans-synaptic signaling
Mayo.ExN	1.14421e-13	6667	1266	612	GO:0071840	GO:BP	cellular component organization or biogenesis
Mayo.ExN	1.14421e-13	717	1266	115	GO:0007268	GO:BP	chemical synaptic transmission
MSBB.ExN	1.31286e-13	4428	2883	888	GO:0043412	GO:BP	macromolecule modification
MSBB.ExN	1.83358e-13	2215	2883	492	GO:0048468	GO:BP	cell development
Mayo.ExN	1.84367e-13	726	1266	115	GO:0099537	GO:BP	trans-synaptic signaling
Mayo.ExN	1.84367e-13	6481	1266	596	GO:0016043	GO:BP	cellular component organization
MSBB.ExN	2.28834e-13	647	2975	179	GO:0030424	GO:CC	axon
MSBB.Oligo	2.79716e-13	98	512	23	GO:0005604	GO:CC	basement membrane
MSBB.ExN	3.3994e-13	2896	2883	615	GO:0035556	GO:BP	intracellular signal transduction
Mayo.ExN	3.93639e-13	745	1266	116	GO:0099536	GO:BP	synaptic signaling
MSBB.ExN	4.06777e-13	1376	2975	323	GO:0043005	GO:CC	neuron projection
MSBB.Oligo	4.65052e-13	743	505	64	GO:0070848	GO:BP	response to growth factor
MSBB.ExN	4.73157e-13	2923	2883	619	GO:0008104	GO:BP	protein localization
MSBB.Oligo	5.94167e-13	1129	505	82	GO:0051270	GO:BP	regulation of cellular component movement
MSBB.ExN	6.03197e-13	3442	2883	711	GO:0010604	GO:BP	positive regulation of macromolecule metabolic process
MSBB.Oligo	6.28448e-13	978	505	75	GO:0030334	GO:BP	regulation of cell migration
MSBB.ExN	7.0706e-13	6982	2883	1314	GO:0019222	GO:BP	regulation of metabolic process
Mayo.ExN	8.21968e-13	3966	1266	399	GO:0006996	GO:BP	organelle organization
MSBB.Oligo	8.47627e-13	715	505	62	GO:0071363	GO:BP	cellular response to growth factor stimulus
MSBB.Oligo	8.94239e-13	2942	505	153	GO:0032879	GO:BP	regulation of localization
MSBB.Oligo	9.03797e-13	601	505	56	GO:0001525	GO:BP	angiogenesis
Mayo.Oligo	9.85212e-13	638	1057	88	GO:0098794	GO:CC	postsynapse
Mayo.Oligo	1.04795e-12	5154	1057	402	GO:0005829	GO:CC	cytosol
MSBB.Oligo	1.05909e-12	2118	505	122	GO:0009888	GO:BP	tissue development
MSBB.Oligo	1.05909e-12	721	505	62	GO:0030155	GO:BP	regulation of cell adhesion
MSBB.ExN	1.31547e-12	1574	2883	367	GO:0048699	GO:BP	generation of neurons
MSBB.ExN	1.35187e-12	551	2968	163	GO:0051020	GO:MF	GTPase binding
MSBB.Oligo	1.41947e-12	1042	505	77	GO:2000145	GO:BP	regulation of cell motility
MSBB.ExN	1.61677e-12	5484	2975	1039	GO:0032991	GO:CC	protein-containing complex
MSBB.ExN	1.67641e-12	6366	2883	1209	GO:0048518	GO:BP	positive regulation of biological process
MSBB.ExN	1.84449e-12	1146	2883	283	GO:0048666	GO:BP	neuron development
MSBB.ExN	2.00279e-12	10111	2883	1815	GO:0006807	GO:BP	nitrogen compound metabolic process
MSBB.ExN	2.01148e-12	6889	2883	1295	GO:0051179	GO:BP	localization
MSBB.ExN	2.01895e-12	3248	2883	673	GO:0051173	GO:BP	positive regulation of nitrogen compound metabolic process
ROSMAP.ExN	2.21771e-12	12840	820	656	GO:0043229	GO:CC	intracellular organelle
MSBB.Oligo	2.40539e-12	7873	505	307	GO:0032501	GO:BP	multicellular organismal process
MSBB.Oligo	2.40539e-12	1076	505	78	GO:0007167	GO:BP	enzyme linked receptor protein signaling pathway
Mayo.ExN	2.64339e-12	2092	1314	234	GO:0098588	GO:CC	bounding membrane of organelle
Mayo.ExN	2.82824e-12	1694	1314	199	GO:0098805	GO:CC	whole membrane
MSBB.Oligo	2.85623e-12	3418	505	168	GO:0070887	GO:BP	cellular response to chemical stimulus
Mayo.Oligo	4.13688e-12	1376	1057	146	GO:0043005	GO:CC	neuron projection
MSBB.ExN	4.7456e-12	769	2883	205	GO:0000904	GO:BP	cell morphogenesis involved in differentiation
MSBB.ExN	5.14281e-12	2820	2883	594	GO:0009653	GO:BP	anatomical structure morphogenesis
MSBB.Oligo	5.51422e-12	3677	505	176	GO:0048513	GO:BP	animal organ development
MSBB.ExN	6.02298e-12	1409	2883	332	GO:0030182	GO:BP	neuron differentiation
Mayo.Oligo	7.27955e-12	622	1057	84	GO:0030425	GO:CC	dendrite
MSBB.ExN	7.31648e-12	863	2975	218	GO:0036477	GO:CC	somatodendritic compartment
Mayo.Oligo	7.48372e-12	624	1057	84	GO:0097447	GO:CC	dendritic tree
MSBB.ExN	7.55465e-12	1822	2883	410	GO:0044093	GO:BP	positive regulation of molecular function
ROSMAP.ExN	7.86075e-12	3966	792	271	GO:0006996	GO:BP	organelle organization
MSBB.ExN	7.91868e-12	687	2883	187	GO:0120039	GO:BP	plasma membrane bounded cell projection morphogenesis
Mayo.Astro	8.52266e-12	592	315	39	GO:0044297	GO:CC	cell body
Mayo.ExN	8.98614e-12	2200	1314	241	GO:0120025	GO:CC	plasma membrane bounded cell projection
Mayo.Oligo	9.96949e-12	2288	1057	210	GO:0042995	GO:CC	cell projection
Mayo.Oligo	9.96949e-12	2200	1057	204	GO:0120025	GO:CC	plasma membrane bounded cell projection
Mayo.Oligo	1.01882e-11	2432	1009	227	GO:0007399	GO:BP	nervous system development
MSBB.ExN	1.05768e-11	443	2968	136	GO:0031267	GO:MF	small GTPase binding
Mayo.ExN	1.11298e-11	638	1314	97	GO:0098794	GO:CC	postsynapse
MSBB.Oligo	1.20673e-11	1758	505	105	GO:0009719	GO:BP	response to endogenous stimulus
MSBB.Oligo	1.26952e-11	1113	505	78	GO:0040012	GO:BP	regulation of locomotion
Mayo.Astro	1.29946e-11	2200	315	83	GO:0120025	GO:CC	plasma membrane bounded cell projection
Mayo.Astro	1.39343e-11	191	305	24	GO:0048167	GO:BP	regulation of synaptic plasticity
MSBB.ExN	1.40054e-11	691	2883	187	GO:0048858	GO:BP	cell projection morphogenesis
Mayo.ExN	1.87148e-11	3914	1314	379	GO:0031982	GO:CC	vesicle
Mayo.ExN	1.91005e-11	12743	1299	1031	GO:0005515	GO:MF	protein binding
MSBB.Oligo	2.06564e-11	2813	505	144	GO:0071310	GO:BP	cellular response to organic substance
MSBB.ExN	2.07445e-11	5357	2883	1031	GO:0044267	GO:BP	cellular protein metabolic process
MSBB.ExN	2.0828e-11	2393	2883	513	GO:0006366	GO:BP	transcription by RNA polymerase II
MSBB.ExN	2.302e-11	1325	2883	313	GO:0033043	GO:BP	regulation of organelle organization
MSBB.ExN	2.85997e-11	711	2883	190	GO:0032990	GO:BP	cell part morphogenesis
MSBB.ExN	2.85997e-11	6438	2883	1211	GO:0060255	GO:BP	regulation of macromolecule metabolic process
MSBB.ExN	2.92712e-11	673	2883	182	GO:0048812	GO:BP	neuron projection morphogenesis
Mayo.ExN	3.3255e-11	222	1266	51	GO:0099003	GO:BP	vesicle-mediated transport in synapse
ROSMAP.ExN	3.40935e-11	1362	820	119	GO:0045202	GO:CC	synapse
MSBB.ExN	3.57527e-11	2237	2883	483	GO:0006357	GO:BP	regulation of transcription by RNA polymerase II
MSBB.Oligo	3.60442e-11	1206	505	81	GO:0048646	GO:BP	anatomical structure formation involved in morphogenesis
MSBB.ExN	3.92737e-11	801	2883	208	GO:0060322	GO:BP	head development
Mayo.Oligo	4.06245e-11	14626	1057	910	GO:0005622	GO:CC	intracellular
ROSMAP.ExN	4.09222e-11	11634	820	603	GO:0005737	GO:CC	cytoplasm
MSBB.Oligo	4.21986e-11	1620	505	98	GO:0016477	GO:BP	cell migration
MSBB.ExN	4.6167e-11	1031	2883	254	GO:0007417	GO:BP	central nervous system development
MSBB.Oligo	5.2771e-11	3421	505	164	GO:0010033	GO:BP	response to organic substance
MSBB.ExN	5.37956e-11	794	2975	201	GO:0016604	GO:CC	nuclear body
MSBB.Oligo	5.60647e-11	1781	505	104	GO:0051674	GO:BP	localization of cell
MSBB.Oligo	5.60647e-11	1781	505	104	GO:0048870	GO:BP	cell motility
MSBB.Oligo	5.88668e-11	3197	505	156	GO:0007166	GO:BP	cell surface receptor signaling pathway
MSBB.ExN	5.93539e-11	3292	2883	671	GO:0033036	GO:BP	macromolecule localization
Mayo.Oligo	9.54345e-11	863	1057	101	GO:0036477	GO:CC	somatodendritic compartment
MSBB.ExN	1.0674e-10	611	2883	167	GO:0048667	GO:BP	cell morphogenesis involved in neuron differentiation
Mayo.Oligo	1.09594e-10	456	1009	69	GO:0050804	GO:BP	modulation of chemical synaptic transmission
Mayo.Oligo	1.09594e-10	611	1009	83	GO:0048667	GO:BP	cell morphogenesis involved in neuron differentiation
Mayo.Oligo	1.09594e-10	457	1009	69	GO:0099177	GO:BP	regulation of trans-synaptic signaling
MSBB.ExN	1.10316e-10	5020	2883	968	GO:0048731	GO:BP	system development
MSBB.ExN	1.23182e-10	1245	2883	294	GO:0051130	GO:BP	positive regulation of cellular component organization
MSBB.Oligo	1.28379e-10	1480	505	91	GO:0071495	GO:BP	cellular response to endogenous stimulus
Mayo.Oligo	1.33977e-10	344	1057	55	GO:0014069	GO:CC	postsynaptic density
MSBB.ExN	1.35693e-10	704	2883	186	GO:0031344	GO:BP	regulation of cell projection organization
Mayo.Oligo	1.37267e-10	673	1009	88	GO:0048812	GO:BP	neuron projection morphogenesis
Mayo.Astro	1.42754e-10	1153	315	54	GO:0098590	GO:CC	plasma membrane region
Mayo.ExN	1.49871e-10	201	1266	47	GO:0099504	GO:BP	synaptic vesicle cycle
Mayo.Oligo	1.49981e-10	711	1009	91	GO:0032990	GO:BP	cell part morphogenesis
ROSMAP.ExN	1.6551e-10	6667	792	396	GO:0071840	GO:BP	cellular component organization or biogenesis
Mayo.Oligo	1.69283e-10	691	1009	89	GO:0048858	GO:BP	cell projection morphogenesis
MSBB.Oligo	1.70695e-10	3356	505	160	GO:0051239	GO:BP	regulation of multicellular organismal process
Mayo.ExN	1.70936e-10	2372	1314	250	GO:0031410	GO:CC	cytoplasmic vesicle
MSBB.ExN	1.72211e-10	3061	2883	627	GO:0065009	GO:BP	regulation of molecular function
Mayo.Oligo	1.72272e-10	348	1057	55	GO:0032279	GO:CC	asymmetric synapse
Mayo.Oligo	1.72272e-10	1327	1057	136	GO:0030054	GO:CC	cell junction
Mayo.Oligo	1.72272e-10	368	1057	57	GO:0098978	GO:CC	glutamatergic synapse
Mayo.ExN	1.86479e-10	2375	1314	250	GO:0097708	GO:CC	intracellular vesicle
Mayo.Oligo	1.88742e-10	370	1057	57	GO:0099572	GO:CC	postsynaptic specialization
MSBB.ExN	2.07085e-10	756	2883	196	GO:0007420	GO:BP	brain development
Mayo.Oligo	2.22403e-10	372	1057	57	GO:0098984	GO:CC	neuron to neuron synapse
Mayo.ExN	2.31484e-10	1327	1314	159	GO:0030054	GO:CC	cell junction
ROSMAP.ExN	2.3353e-10	6481	792	386	GO:0016043	GO:BP	cellular component organization
MSBB.ExN	2.40518e-10	694	2883	183	GO:0120035	GO:BP	regulation of plasma membrane bounded cell projection organization
Mayo.Oligo	2.49145e-10	745	1009	93	GO:0099536	GO:BP	synaptic signaling
Mayo.Oligo	2.49145e-10	687	1009	88	GO:0120039	GO:BP	plasma membrane bounded cell projection morphogenesis
MSBB.ExN	2.5526e-10	517	2975	142	GO:0015629	GO:CC	actin cytoskeleton
Mayo.Oligo	2.5953e-10	1017	1009	115	GO:0031175	GO:BP	neuron projection development
MSBB.Oligo	2.65966e-10	355	505	38	GO:0031589	GO:BP	cell-substrate adhesion
Mayo.ExN	2.76058e-10	5337	1266	493	GO:0006810	GO:BP	transport
Mayo.Oligo	2.77575e-10	726	1009	91	GO:0099537	GO:BP	trans-synaptic signaling
Mayo.ExN	2.90624e-10	5460	1266	502	GO:0051234	GO:BP	establishment of localization
Mayo.Astro	3.31031e-10	2432	305	89	GO:0007399	GO:BP	nervous system development
Mayo.Oligo	3.31985e-10	1177	1009	127	GO:0032989	GO:BP	cellular component morphogenesis
Mayo.Astro	3.36064e-10	173	315	20	GO:0043197	GO:CC	dendritic spine
MSBB.Oligo	3.42013e-10	4531	505	198	GO:0048869	GO:BP	cellular developmental process
MSBB.ExN	3.6983e-10	785	2975	196	GO:0070161	GO:CC	anchoring junction
Mayo.Astro	3.94092e-10	175	315	20	GO:0044309	GO:CC	neuron spine
MSBB.ExN	4.08059e-10	428	2968	128	GO:0017016	GO:MF	Ras GTPase binding
MSBB.ExN	4.08059e-10	433	2968	129	GO:0003779	GO:MF	actin binding
Mayo.Oligo	4.1528e-10	769	1009	94	GO:0000904	GO:BP	cell morphogenesis involved in differentiation
MSBB.ExN	4.16448e-10	6889	2883	1276	GO:1901564	GO:BP	organonitrogen compound metabolic process
MSBB.ExN	4.65126e-10	5940	2883	1118	GO:0019538	GO:BP	protein metabolic process
MSBB.ExN	5.02206e-10	9592	2883	1713	GO:0043170	GO:BP	macromolecule metabolic process
Mayo.Oligo	5.53498e-10	12743	1047	836	GO:0005515	GO:MF	protein binding
Mayo.Oligo	6.5139e-10	717	1009	89	GO:0098916	GO:BP	anterograde trans-synaptic signaling
Mayo.Oligo	6.5139e-10	717	1009	89	GO:0007268	GO:BP	chemical synaptic transmission
ROSMAP.ExN	6.79077e-10	2263	820	166	GO:0005856	GO:CC	cytoskeleton
MSBB.ExN	8.1096e-10	684	2883	179	GO:0045664	GO:BP	regulation of neuron differentiation
Mayo.Oligo	8.43506e-10	1068	1009	117	GO:0000902	GO:BP	cell morphogenesis
Mayo.ExN	8.60973e-10	863	1314	114	GO:0036477	GO:CC	somatodendritic compartment
Mayo.Astro	8.85078e-10	1699	305	70	GO:0007267	GO:BP	cell-cell signaling
Mayo.Oligo	8.94633e-10	4216	1009	332	GO:0006464	GO:BP	cellular protein modification process
Mayo.Oligo	8.94633e-10	4216	1009	332	GO:0036211	GO:BP	protein modification process
Mayo.Astro	9.36599e-10	5732	315	151	GO:0071944	GO:CC	cell periphery
Mayo.Oligo	9.44352e-10	4156	1009	328	GO:0065008	GO:BP	regulation of biological quality
ROSMAP.ExN	9.46126e-10	13720	820	678	GO:0043226	GO:CC	organelle
MSBB.Oligo	9.57803e-10	683	508	55	GO:0005198	GO:MF	structural molecule activity
MSBB.ExN	9.92552e-10	1994	2883	430	GO:0070727	GO:BP	cellular macromolecule localization
MSBB.ExN	1.11229e-09	1242	2975	282	GO:0015630	GO:CC	microtubule cytoskeleton
ROSMAP.ExN	1.17481e-09	4964	820	302	GO:0043228	GO:CC	non-membrane-bounded organelle
MSBB.Oligo	1.21248e-09	1177	505	76	GO:0032989	GO:BP	cellular component morphogenesis
ROSMAP.ExN	1.22208e-09	531	820	60	GO:0098793	GO:CC	presynapse
ROSMAP.ExN	1.22208e-09	647	820	68	GO:0030424	GO:CC	axon
ROSMAP.ExN	1.22208e-09	1242	820	106	GO:0015630	GO:CC	microtubule cytoskeleton
Mayo.Astro	1.22886e-09	1679	305	69	GO:0022008	GO:BP	neurogenesis
Mayo.Astro	1.22886e-09	1409	305	62	GO:0030182	GO:BP	neuron differentiation
MSBB.Oligo	1.25272e-09	2252	505	118	GO:0006928	GO:BP	movement of cell or subcellular component
MSBB.Oligo	1.25272e-09	2010	505	109	GO:0040011	GO:BP	locomotion
MSBB.ExN	1.31213e-09	5604	2883	1058	GO:0007275	GO:BP	multicellular organism development
ROSMAP.ExN	1.33262e-09	5154	820	310	GO:0005829	GO:CC	cytosol
MSBB.ExN	1.37476e-09	592	2975	155	GO:0044297	GO:CC	cell body
MSBB.ExN	1.37874e-09	1917	2883	415	GO:0031399	GO:BP	regulation of protein modification process
MSBB.ExN	1.43175e-09	1983	2883	427	GO:0034613	GO:BP	cellular protein localization
Mayo.Astro	1.43249e-09	1574	305	66	GO:0048699	GO:BP	generation of neurons
Mayo.Astro	1.43249e-09	492	305	34	GO:0034765	GO:BP	regulation of ion transmembrane transport
MSBB.ExN	1.47222e-09	2922	2883	596	GO:0051246	GO:BP	regulation of protein metabolic process
Mayo.Astro	1.50298e-09	523	315	33	GO:0043025	GO:CC	neuronal cell body
ROSMAP.ExN	1.50679e-09	4954	820	300	GO:0043232	GO:CC	intracellular non-membrane-bounded organelle
Mayo.ExN	1.51895e-09	157	1314	37	GO:0042734	GO:CC	presynaptic membrane
Mayo.Oligo	1.52141e-09	1146	1009	122	GO:0048666	GO:BP	neuron development
MSBB.ExN	1.61199e-09	1925	2883	416	GO:0010557	GO:BP	positive regulation of macromolecule biosynthetic process
MSBB.Oligo	1.61305e-09	1068	505	71	GO:0000902	GO:BP	cell morphogenesis
Mayo.ExN	1.71068e-09	780	1314	105	GO:0030659	GO:CC	cytoplasmic vesicle membrane
MSBB.Oligo	1.80127e-09	4335	505	189	GO:0030154	GO:BP	cell differentiation
MSBB.Oligo	1.80971e-09	1095	505	72	GO:0009887	GO:BP	animal organ morphogenesis
Mayo.ExN	1.9377e-09	2047	1266	225	GO:0043933	GO:BP	protein-containing complex subunit organization
MSBB.ExN	1.95017e-09	481	2883	135	GO:0043087	GO:BP	regulation of GTPase activity
MSBB.ExN	1.98109e-09	1281	2883	295	GO:0018193	GO:BP	peptidyl-amino acid modification
MSBB.Oligo	1.99961e-09	97	512	19	GO:0005581	GO:CC	collagen trimer
Mayo.Oligo	2.112e-09	1679	1009	161	GO:0022008	GO:BP	neurogenesis
MSBB.ExN	2.14789e-09	781	2883	197	GO:0030029	GO:BP	actin filament-based process
MSBB.ExN	2.22621e-09	3367	2883	673	GO:0006796	GO:BP	phosphate-containing compound metabolic process
Mayo.Oligo	2.25959e-09	173	1009	36	GO:0099173	GO:BP	postsynapse organization
Mayo.Astro	2.28156e-09	1146	305	54	GO:0048666	GO:BP	neuron development
MSBB.ExN	2.49645e-09	679	2883	176	GO:0030036	GO:BP	actin cytoskeleton organization
MSBB.Oligo	2.52085e-09	6481	505	255	GO:0016043	GO:BP	cellular component organization
MSBB.ExN	2.56849e-09	6105	2883	1139	GO:0048856	GO:BP	anatomical structure development
Mayo.Oligo	2.57535e-09	430	1009	62	GO:0050808	GO:BP	synapse organization
Mayo.Astro	2.73559e-09	149	305	19	GO:0007612	GO:BP	learning
MSBB.ExN	2.83903e-09	2021	2883	432	GO:0031328	GO:BP	positive regulation of cellular biosynthetic process
Mayo.Oligo	2.95547e-09	1578	1009	153	GO:0030030	GO:BP	cell projection organization
MSBB.ExN	2.98348e-09	330	2968	103	GO:0045296	GO:MF	cadherin binding
MSBB.ExN	2.98348e-09	1502	2968	342	GO:0005524	GO:MF	ATP binding
MSBB.ExN	3.08863e-09	2744	2883	562	GO:0032268	GO:BP	regulation of cellular protein metabolic process
Mayo.Oligo	3.17494e-09	1539	1009	150	GO:0120036	GO:BP	plasma membrane bounded cell projection organization
MSBB.ExN	3.31753e-09	10594	2883	1864	GO:0044238	GO:BP	primary metabolic process
MSBB.ExN	3.57522e-09	856	2883	211	GO:0050767	GO:BP	regulation of neurogenesis
Mayo.ExN	3.66345e-09	801	1314	106	GO:0012506	GO:CC	vesicle membrane
MSBB.ExN	3.80726e-09	519	2883	142	GO:0010975	GO:BP	regulation of neuron projection development
MSBB.ExN	4.05403e-09	1560	2968	352	GO:0032559	GO:MF	adenyl ribonucleotide binding
MSBB.Oligo	4.07439e-09	2215	505	115	GO:0048468	GO:BP	cell development
ROSMAP.ExN	4.08837e-09	1376	820	112	GO:0043005	GO:CC	neuron projection
ROSMAP.ExN	4.10264e-09	2288	820	163	GO:0042995	GO:CC	cell projection
Mayo.ExN	4.31075e-09	390	1314	64	GO:0097060	GO:CC	synaptic membrane
MSBB.ExN	4.71405e-09	2718	2883	556	GO:0031324	GO:BP	negative regulation of cellular metabolic process
MSBB.ExN	4.71405e-09	3393	2883	675	GO:0006793	GO:BP	phosphorus metabolic process
MSBB.ExN	4.71405e-09	1876	2883	404	GO:1902531	GO:BP	regulation of intracellular signal transduction
MSBB.Oligo	4.88555e-09	2779	505	135	GO:0050793	GO:BP	regulation of developmental process
Mayo.Astro	5.89156e-09	5604	315	146	GO:0005886	GO:CC	plasma membrane
Mayo.Astro	5.89156e-09	647	315	36	GO:0030424	GO:CC	axon
MSBB.ExN	6.03978e-09	1571	2968	353	GO:0030554	GO:MF	adenyl nucleotide binding
MSBB.ExN	6.19336e-09	2055	2883	436	GO:0009891	GO:BP	positive regulation of biosynthetic process
MSBB.ExN	6.19336e-09	963	2883	231	GO:0051960	GO:BP	regulation of nervous system development
ROSMAP.ExN	6.25698e-09	12743	807	651	GO:0005515	GO:MF	protein binding
MSBB.ExN	6.65499e-09	4116	2883	799	GO:0019219	GO:BP	regulation of nucleobase-containing compound metabolic process
MSBB.ExN	6.69037e-09	1466	2883	327	GO:0043085	GO:BP	positive regulation of catalytic activity
MSBB.ExN	6.69037e-09	4996	2883	949	GO:0048523	GO:BP	negative regulation of cellular process
MSBB.ExN	6.85464e-09	6630	2883	1222	GO:0032502	GO:BP	developmental process
MSBB.ExN	7.34563e-09	1393	2975	306	GO:1902494	GO:CC	catalytic complex
Mayo.ExN	7.4275e-09	213	1314	43	GO:0008021	GO:CC	synaptic vesicle
Mayo.ExN	7.60784e-09	2432	1266	255	GO:0007399	GO:BP	nervous system development
MSBB.ExN	7.84428e-09	598	2968	160	GO:0003712	GO:MF	transcription coregulator activity
Mayo.ExN	8.11838e-09	415	1314	66	GO:0030133	GO:CC	transport vesicle
MSBB.ExN	8.14514e-09	487	2883	134	GO:0007409	GO:BP	axonogenesis
Mayo.Astro	8.33841e-09	531	315	32	GO:0098793	GO:CC	presynapse
Mayo.ExN	8.42624e-09	1699	1266	192	GO:0007267	GO:BP	cell-cell signaling
Mayo.Oligo	8.4865e-09	1409	1009	139	GO:0030182	GO:BP	neuron differentiation
Mayo.Oligo	8.66931e-09	6481	1009	464	GO:0016043	GO:BP	cellular component organization
MSBB.Oligo	9.23328e-09	683	505	52	GO:0061061	GO:BP	muscle structure development
Mayo.Astro	1.00807e-08	1017	305	49	GO:0031175	GO:BP	neuron projection development
Mayo.Oligo	1.06527e-08	239	1009	42	GO:0050803	GO:BP	regulation of synapse structure or activity
MSBB.Oligo	1.1143e-08	216	505	27	GO:0010810	GO:BP	regulation of cell-substrate adhesion
Mayo.Oligo	1.17487e-08	6667	1009	474	GO:0071840	GO:BP	cellular component organization or biogenesis
Mayo.Oligo	1.17487e-08	2942	1009	244	GO:0032879	GO:BP	regulation of localization
MSBB.Oligo	1.21467e-08	1932	505	103	GO:0045595	GO:BP	regulation of cell differentiation
MSBB.ExN	1.31952e-08	174	2975	61	GO:0031256	GO:CC	leading edge membrane
MSBB.ExN	1.38704e-08	2523	2883	518	GO:0051172	GO:BP	negative regulation of nitrogen compound metabolic process
Mayo.Astro	1.39089e-08	368	315	26	GO:0098978	GO:CC	glutamatergic synapse
Mayo.Oligo	1.48695e-08	2889	1009	240	GO:0051641	GO:BP	cellular localization
MSBB.Oligo	1.4924e-08	2210	505	113	GO:2000026	GO:BP	regulation of multicellular organismal development
MSBB.Oligo	1.58457e-08	5604	512	219	GO:0005886	GO:CC	plasma membrane
MSBB.Oligo	1.58457e-08	5732	512	223	GO:0071944	GO:CC	cell periphery
Mayo.Astro	1.68802e-08	430	305	30	GO:0050808	GO:BP	synapse organization
MSBB.ExN	1.71358e-08	1742	2883	376	GO:0051254	GO:BP	positive regulation of RNA metabolic process
MSBB.ExN	1.72537e-08	523	2975	137	GO:0043025	GO:CC	neuronal cell body
MSBB.ExN	2.11938e-08	1215	2883	277	GO:0045944	GO:BP	positive regulation of transcription by RNA polymerase II
ROSMAP.ExN	2.15086e-08	1371	792	115	GO:0007010	GO:BP	cytoskeleton organization
Mayo.Oligo	2.23453e-08	1983	1009	178	GO:0034613	GO:BP	cellular protein localization
Mayo.Oligo	2.23453e-08	2541	1009	216	GO:0051128	GO:BP	regulation of cellular component organization
Mayo.ExN	2.24995e-08	229	1314	44	GO:0070382	GO:CC	exocytic vesicle
MSBB.Oligo	2.48971e-08	3914	512	166	GO:0031982	GO:CC	vesicle
MSBB.ExN	2.51247e-08	447	2968	126	GO:0004674	GO:MF	protein serine/threonine kinase activity
Mayo.Oligo	2.54018e-08	4428	1009	337	GO:0043412	GO:BP	macromolecule modification
MSBB.ExN	2.58298e-08	2027	2883	427	GO:0006468	GO:BP	protein phosphorylation
Mayo.Oligo	2.6194e-08	228	1009	40	GO:0050807	GO:BP	regulation of synapse organization
MSBB.ExN	2.75921e-08	1651	2883	358	GO:1903508	GO:BP	positive regulation of nucleic acid-templated transcription
Mayo.Astro	2.785e-08	711	305	39	GO:0043269	GO:BP	regulation of ion transport
MSBB.ExN	2.95033e-08	1652	2883	358	GO:1902680	GO:BP	positive regulation of RNA biosynthetic process
MSBB.ExN	2.9941e-08	2480	2883	508	GO:0016310	GO:BP	phosphorylation
MSBB.ExN	3.10035e-08	11187	2883	1948	GO:0050794	GO:BP	regulation of cellular process
Mayo.Oligo	3.19736e-08	1994	1009	178	GO:0070727	GO:BP	cellular macromolecule localization
MSBB.ExN	3.33733e-08	2048	2883	430	GO:0010628	GO:BP	positive regulation of gene expression
MSBB.ExN	3.33733e-08	1905	2883	404	GO:0045935	GO:BP	positive regulation of nucleobase-containing compound metabolic process
MSBB.ExN	3.34835e-08	584	2883	152	GO:0007264	GO:BP	small GTPase mediated signal transduction
Mayo.Oligo	3.4301e-08	2215	1009	193	GO:0048468	GO:BP	cell development
MSBB.ExN	3.48023e-08	823	2883	200	GO:0060341	GO:BP	regulation of cellular localization
MSBB.Oligo	3.55338e-08	244	505	28	GO:0071560	GO:BP	cellular response to transforming growth factor beta stimulus
MSBB.ExN	3.74341e-08	11103	2883	1934	GO:0071704	GO:BP	organic substance metabolic process
MSBB.ExN	3.79703e-08	1762	2968	384	GO:0008144	GO:MF	drug binding
MSBB.ExN	3.79703e-08	306	2968	94	GO:0030695	GO:MF	GTPase regulator activity
Mayo.Oligo	3.79741e-08	1699	1009	157	GO:0007267	GO:BP	cell-cell signaling
MSBB.Oligo	3.83963e-08	245	505	28	GO:0034329	GO:BP	cell junction assembly
Mayo.ExN	3.8948e-08	175	1266	39	GO:0099643	GO:BP	signal release from synapse
Mayo.ExN	3.8948e-08	124	1266	32	GO:0016079	GO:BP	synaptic vesicle exocytosis
Mayo.ExN	3.8948e-08	456	1266	72	GO:0050804	GO:BP	modulation of chemical synaptic transmission
Mayo.ExN	3.8948e-08	118	1266	31	GO:0098693	GO:BP	regulation of synaptic vesicle cycle
Mayo.ExN	3.8948e-08	175	1266	39	GO:0007269	GO:BP	neurotransmitter secretion
Mayo.ExN	3.8948e-08	457	1266	72	GO:0099177	GO:BP	regulation of trans-synaptic signaling
Mayo.Oligo	3.97453e-08	1574	1009	148	GO:0048699	GO:BP	generation of neurons
Mayo.ExN	4.25171e-08	1393	1314	156	GO:1902494	GO:CC	catalytic complex
MSBB.Oligo	4.28924e-08	6889	505	262	GO:0051179	GO:BP	localization
MSBB.ExN	4.35859e-08	2047	2883	429	GO:0043933	GO:BP	protein-containing complex subunit organization
Mayo.Astro	4.48704e-08	9731	315	214	GO:0016020	GO:CC	membrane
MSBB.ExN	4.70448e-08	1551	2883	338	GO:0045893	GO:BP	positive regulation of transcription, DNA-templated
MSBB.ExN	4.81548e-08	11681	2883	2023	GO:0008152	GO:BP	metabolic process
MSBB.Oligo	5.07386e-08	6798	505	259	GO:0007154	GO:BP	cell communication
MSBB.ExN	5.07576e-08	372	2975	104	GO:0098984	GO:CC	neuron to neuron synapse
MSBB.ExN	5.25018e-08	1012	2883	236	GO:0009894	GO:BP	regulation of catabolic process
MSBB.ExN	5.27246e-08	1907	2883	403	GO:0023056	GO:BP	positive regulation of signaling
MSBB.Oligo	5.38848e-08	6667	505	255	GO:0071840	GO:BP	cellular component organization or biogenesis
MSBB.Oligo	5.45349e-08	6366	505	246	GO:0048518	GO:BP	positive regulation of biological process
MSBB.Oligo	5.45349e-08	4897	505	201	GO:0042221	GO:BP	response to chemical
MSBB.Oligo	5.45349e-08	6772	505	258	GO:0023052	GO:BP	signaling
MSBB.Oligo	5.46107e-08	250	505	28	GO:0071559	GO:BP	response to transforming growth factor beta
MSBB.ExN	5.71297e-08	3299	2883	650	GO:0009892	GO:BP	negative regulation of metabolic process
MSBB.Oligo	5.93069e-08	1022	505	65	GO:0045597	GO:BP	positive regulation of cell differentiation
MSBB.Oligo	6.03128e-08	769	505	54	GO:0000904	GO:BP	cell morphogenesis involved in differentiation
Mayo.Astro	6.14243e-08	900	305	44	GO:0098655	GO:BP	cation transmembrane transport
MSBB.ExN	6.33173e-08	638	2975	158	GO:0098794	GO:CC	postsynapse
Mayo.ExN	6.67219e-08	307	1314	52	GO:0150034	GO:CC	distal axon
MSBB.ExN	6.88454e-08	345	2968	102	GO:0060589	GO:MF	nucleoside-triphosphatase regulator activity
MSBB.ExN	7.16215e-08	1848	2968	398	GO:0035639	GO:MF	purine ribonucleoside triphosphate binding
MSBB.Oligo	7.17997e-08	436	505	38	GO:1901342	GO:BP	regulation of vasculature development
MSBB.ExN	7.31799e-08	177	2975	60	GO:0001726	GO:CC	ruffle
Mayo.Oligo	7.49359e-08	180	1009	34	GO:0007416	GO:BP	synapse assembly
MSBB.ExN	7.50413e-08	2779	2883	558	GO:0050793	GO:BP	regulation of developmental process
ROSMAP.ExN	8.253e-08	217	820	32	GO:0030658	GO:CC	transport vesicle membrane
MSBB.Oligo	8.26933e-08	9455	505	333	GO:0050896	GO:BP	response to stimulus
MSBB.Oligo	8.26933e-08	602	505	46	GO:0051272	GO:BP	positive regulation of cellular component movement
MSBB.ExN	8.30909e-08	6178	2883	1137	GO:0044249	GO:BP	cellular biosynthetic process
Mayo.Astro	8.49338e-08	582	305	34	GO:0034762	GO:BP	regulation of transmembrane transport
MSBB.ExN	8.79531e-08	5681	2883	1054	GO:0048519	GO:BP	negative regulation of biological process
MSBB.Astro	9.11622e-08	16	204	7	GO:0042613	GO:CC	MHC class II protein complex
MSBB.ExN	9.65047e-08	16230	2883	2696	GO:0009987	GO:BP	cellular process
Mayo.Oligo	9.87893e-08	487	1009	63	GO:0007409	GO:BP	axonogenesis
Mayo.ExN	1.02918e-07	296	1266	53	GO:0016236	GO:BP	macroautophagy
Mayo.ExN	1.02918e-07	2146	1266	225	GO:0016192	GO:BP	vesicle-mediated transport
MSBB.Oligo	1.03706e-07	693	505	50	GO:0097435	GO:BP	supramolecular fiber organization
ROSMAP.ExN	1.0379e-07	991	807	89	GO:0008092	GO:MF	cytoskeletal protein binding
MSBB.ExN	1.06627e-07	2385	2883	487	GO:0050790	GO:BP	regulation of catalytic activity
Mayo.Astro	1.09648e-07	305	305	24	GO:0050890	GO:BP	cognition
MSBB.Oligo	1.10882e-07	121	505	19	GO:0010811	GO:BP	positive regulation of cell-substrate adhesion
MSBB.ExN	1.2607e-07	4156	2883	795	GO:0065008	GO:BP	regulation of biological quality
Mayo.ExN	1.29329e-07	5484	1314	476	GO:0032991	GO:CC	protein-containing complex
MSBB.ExN	1.3539e-07	1861	2883	392	GO:0019220	GO:BP	regulation of phosphate metabolic process
MSBB.ExN	1.38723e-07	613	2968	158	GO:0004672	GO:MF	protein kinase activity
MSBB.ExN	1.39748e-07	1913	2968	408	GO:0032555	GO:MF	purine ribonucleotide binding
MSBB.ExN	1.41984e-07	712	2968	178	GO:0019904	GO:MF	protein domain specific binding
MSBB.Oligo	1.42536e-07	297	505	30	GO:0034330	GO:BP	cell junction organization
MSBB.ExN	1.42644e-07	427	2975	114	GO:0005874	GO:CC	microtubule
MSBB.ExN	1.43899e-07	1862	2883	392	GO:0051174	GO:BP	regulation of phosphorus metabolic process
MSBB.ExN	1.45374e-07	3856	2883	743	GO:0051252	GO:BP	regulation of RNA metabolic process
Mayo.Oligo	1.4883e-07	684	1009	79	GO:0045664	GO:BP	regulation of neuron differentiation
Mayo.Astro	1.56658e-07	225	315	19	GO:0034703	GO:CC	cation channel complex
ROSMAP.ExN	1.64349e-07	2200	820	152	GO:0120025	GO:CC	plasma membrane bounded cell projection
Mayo.ExN	1.70117e-07	1586	1314	170	GO:0005794	GO:CC	Golgi apparatus
MSBB.ExN	1.73377e-07	824	2968	200	GO:0016301	GO:MF	kinase activity
MSBB.ExN	1.73377e-07	1929	2968	410	GO:0032553	GO:MF	ribonucleotide binding
MSBB.Oligo	1.76628e-07	393	505	35	GO:0045765	GO:BP	regulation of angiogenesis
MSBB.Oligo	1.76628e-07	355	505	33	GO:0007178	GO:BP	transmembrane receptor protein serine/threonine kinase signaling pathway
MSBB.ExN	1.7958e-07	4334	2883	824	GO:0031326	GO:BP	regulation of cellular biosynthetic process
MSBB.ExN	1.92284e-07	348	2975	97	GO:0032279	GO:CC	asymmetric synapse
Mayo.Oligo	1.95269e-07	531	1009	66	GO:0061564	GO:BP	axon development
MSBB.ExN	1.95385e-07	2105	2883	435	GO:0033554	GO:BP	cellular response to stress
MSBB.ExN	1.95385e-07	1900	2883	398	GO:0010647	GO:BP	positive regulation of cell communication
MSBB.ExN	1.96245e-07	1926	2968	409	GO:0017076	GO:MF	purine nucleotide binding
MSBB.ExN	1.9678e-07	1512	2883	327	GO:0045934	GO:BP	negative regulation of nucleobase-containing compound metabolic process
Mayo.Oligo	1.98711e-07	508	1009	64	GO:0022604	GO:BP	regulation of cell morphogenesis
MSBB.Oligo	2.0047e-07	1853	505	96	GO:0051240	GO:BP	positive regulation of multicellular organismal process
MSBB.ExN	2.00729e-07	3049	2883	602	GO:0010605	GO:BP	negative regulation of macromolecule metabolic process
Mayo.ExN	2.03751e-07	6889	1266	590	GO:0051179	GO:BP	localization
MSBB.ExN	2.09985e-07	344	2975	96	GO:0014069	GO:CC	postsynaptic density
Mayo.ExN	2.12428e-07	78	573	24	KEGG:04721	KEGG	Synaptic vesicle cycle
MSBB.ExN	2.16311e-07	368	2975	101	GO:0098978	GO:CC	glutamatergic synapse
MSBB.ExN	2.19585e-07	873	2883	206	GO:0000122	GO:BP	negative regulation of transcription by RNA polymerase II
MSBB.ExN	2.21416e-07	342	2883	98	GO:0051056	GO:BP	regulation of small GTPase mediated signal transduction
Mayo.Astro	2.28823e-07	147	310	17	GO:0022843	GO:MF	voltage-gated cation channel activity
Mayo.Astro	2.28823e-07	348	310	26	GO:0022836	GO:MF	gated channel activity
MSBB.Oligo	2.36413e-07	560	505	43	GO:0030335	GO:BP	positive regulation of cell migration
MSBB.Oligo	2.37827e-07	5605	505	220	GO:0048522	GO:BP	positive regulation of cellular process
MSBB.ExN	2.45178e-07	3914	2975	735	GO:0031982	GO:CC	vesicle
Mayo.Astro	2.48841e-07	673	305	36	GO:0048812	GO:BP	neuron projection morphogenesis
Mayo.ExN	2.50088e-07	1012	1266	124	GO:0009894	GO:BP	regulation of catabolic process
ROSMAP.ExN	2.61179e-07	1574	792	123	GO:0048699	GO:BP	generation of neurons
ROSMAP.ExN	2.61179e-07	1679	792	129	GO:0022008	GO:BP	neurogenesis
MSBB.Oligo	2.66945e-07	584	505	44	GO:2000147	GO:BP	positive regulation of cell motility
MSBB.ExN	2.81269e-07	253	2968	79	GO:0008017	GO:MF	microtubule binding
Mayo.Oligo	2.97614e-07	311	1009	46	GO:0010769	GO:BP	regulation of cell morphogenesis involved in differentiation
Mayo.ExN	3.01405e-07	1285	1314	143	GO:0098796	GO:CC	membrane protein complex
Mayo.Astro	3.05077e-07	122	315	14	GO:0099055	GO:CC	integral component of postsynaptic membrane
MSBB.Oligo	3.06473e-07	422	505	36	GO:0045785	GO:BP	positive regulation of cell adhesion
MSBB.Oligo	3.09439e-07	998	505	62	GO:0014070	GO:BP	response to organic cyclic compound
MSBB.Oligo	3.09439e-07	1194	505	70	GO:0022603	GO:BP	regulation of anatomical structure morphogenesis
MSBB.Oligo	3.12842e-07	2541	505	120	GO:0051128	GO:BP	regulation of cellular component organization
Mayo.Oligo	3.15508e-07	550	1009	67	GO:1903827	GO:BP	regulation of cellular protein localization
MSBB.Oligo	3.15529e-07	1072	505	65	GO:0051093	GO:BP	negative regulation of developmental process
Mayo.Astro	3.32027e-07	202	310	19	GO:0005244	GO:MF	voltage-gated ion channel activity
Mayo.Astro	3.32027e-07	349	310	25	GO:0005261	GO:MF	cation channel activity
Mayo.Astro	3.32027e-07	203	310	19	GO:0022832	GO:MF	voltage-gated channel activity
Mayo.Astro	3.33029e-07	101	305	14	GO:0007215	GO:BP	glutamate receptor signaling pathway
MSBB.Oligo	3.59912e-07	613	505	45	GO:0040017	GO:BP	positive regulation of locomotion
MSBB.Oligo	3.59912e-07	406	505	35	GO:0001503	GO:BP	ossification
MSBB.Oligo	3.61269e-07	7772	505	283	GO:0051716	GO:BP	cellular response to stimulus
MSBB.ExN	3.64283e-07	1932	2883	402	GO:0045595	GO:BP	regulation of cell differentiation
MSBB.Oligo	3.67079e-07	702	505	49	GO:0009611	GO:BP	response to wounding
MSBB.ExN	3.71738e-07	531	2883	137	GO:0061564	GO:BP	axon development
Mayo.Oligo	3.73384e-07	1947	1009	170	GO:0051049	GO:BP	regulation of transport
MSBB.ExN	3.94032e-07	4417	2883	835	GO:0009889	GO:BP	regulation of biosynthetic process
Mayo.Astro	3.94958e-07	687	305	36	GO:0120039	GO:BP	plasma membrane bounded cell projection morphogenesis
MSBB.ExN	3.95432e-07	718	2968	177	GO:0016773	GO:MF	phosphotransferase activity, alcohol group as acceptor
Mayo.ExN	3.99068e-07	198	573	40	KEGG:05016	KEGG	Huntington disease
Mayo.Oligo	4.19409e-07	3393	1009	265	GO:0006793	GO:BP	phosphorus metabolic process
Mayo.Astro	4.3426e-07	691	305	36	GO:0048858	GO:BP	cell projection morphogenesis
Mayo.Astro	4.3426e-07	442	305	28	GO:0042391	GO:BP	regulation of membrane potential
MSBB.Oligo	4.39139e-07	278	505	28	GO:0043542	GO:BP	endothelial cell migration
MSBB.ExN	4.40945e-07	1254	2883	277	GO:0051276	GO:BP	chromosome organization
Mayo.ExN	4.42177e-07	372	1314	57	GO:0098984	GO:CC	neuron to neuron synapse
MSBB.Oligo	4.44278e-07	1327	512	73	GO:0030054	GO:CC	cell junction
MSBB.ExN	4.45423e-07	4226	2883	802	GO:0034654	GO:BP	nucleobase-containing compound biosynthetic process
Mayo.ExN	4.63319e-07	115	1314	27	GO:0030672	GO:CC	synaptic vesicle membrane
Mayo.ExN	4.63319e-07	115	1314	27	GO:0099501	GO:CC	exocytic vesicle membrane
MSBB.ExN	4.85139e-07	341	2968	98	GO:0003713	GO:MF	transcription coactivator activity
MSBB.ExN	4.93742e-07	991	2883	227	GO:0060284	GO:BP	regulation of cell development
MSBB.ExN	5.03299e-07	622	2975	151	GO:0030425	GO:CC	dendrite
MSBB.Oligo	5.07603e-07	535	505	41	GO:0001501	GO:BP	skeletal system development
Mayo.Oligo	5.08214e-07	963	1009	99	GO:0051960	GO:BP	regulation of nervous system development
Mayo.Oligo	5.08214e-07	781	1009	85	GO:0030029	GO:BP	actin filament-based process
ROSMAP.ExN	5.17146e-07	2541	792	175	GO:0051128	GO:BP	regulation of cellular component organization
ROSMAP.ExN	5.17146e-07	2432	792	169	GO:0007399	GO:BP	nervous system development
Mayo.Astro	5.47537e-07	128	315	14	GO:0098936	GO:CC	intrinsic component of postsynaptic membrane
MSBB.Oligo	5.73902e-07	3638	505	156	GO:0010646	GO:BP	regulation of cell communication
MSBB.ExN	5.8521e-07	2146	2883	439	GO:0016192	GO:BP	vesicle-mediated transport
MSBB.ExN	5.96472e-07	4421	2883	834	GO:0048583	GO:BP	regulation of response to stimulus
MSBB.ExN	5.97297e-07	4186	2883	794	GO:0010556	GO:BP	regulation of macromolecule biosynthetic process
Mayo.ExN	6.05691e-07	557	1266	79	GO:0051649	GO:BP	establishment of localization in cell
Mayo.Oligo	6.11501e-07	823	1009	88	GO:0060341	GO:BP	regulation of cellular localization
MSBB.Oligo	6.13689e-07	2432	505	115	GO:0007399	GO:BP	nervous system development
MSBB.Oligo	6.13689e-07	357	505	32	GO:0010631	GO:BP	epithelial cell migration
MSBB.ExN	6.14754e-07	624	2975	151	GO:0097447	GO:CC	dendritic tree
Mayo.Astro	6.33672e-07	1205	305	50	GO:0006812	GO:BP	cation transport
Mayo.Oligo	6.37559e-07	150	1009	29	GO:0048813	GO:BP	dendrite morphogenesis
MSBB.ExN	6.50279e-07	343	2968	98	GO:0015631	GO:MF	tubulin binding
MSBB.ExN	6.59339e-07	4036	2883	768	GO:2000112	GO:BP	regulation of cellular macromolecule biosynthetic process
MSBB.ExN	6.59339e-07	2210	2883	450	GO:2000026	GO:BP	regulation of multicellular organismal development
MSBB.Oligo	6.61662e-07	11634	512	376	GO:0005737	GO:CC	cytoplasm
MSBB.ExN	6.68874e-07	410	2975	108	GO:0005925	GO:CC	focal adhesion
ROSMAP.ExN	6.78677e-07	1539	792	119	GO:0120036	GO:BP	plasma membrane bounded cell projection organization
MSBB.Oligo	6.8074e-07	3679	505	157	GO:0023051	GO:BP	regulation of signaling
Mayo.Oligo	7.01322e-07	3367	1009	262	GO:0006796	GO:BP	phosphate-containing compound metabolic process
Mayo.Astro	7.03189e-07	302	315	21	GO:0034702	GO:CC	ion channel complex
MSBB.Oligo	7.03427e-07	139	508	20	GO:0005178	GO:MF	integrin binding
ROSMAP.ExN	7.15213e-07	1578	792	121	GO:0030030	GO:BP	cell projection organization
MSBB.Oligo	7.26869e-07	360	505	32	GO:0090132	GO:BP	epithelium migration
MSBB.ExN	7.41219e-07	1412	2883	305	GO:0051253	GO:BP	negative regulation of RNA metabolic process
MSBB.ExN	7.41219e-07	168	2883	57	GO:0021915	GO:BP	neural tube development
MSBB.ExN	7.42294e-07	241	2883	74	GO:0060560	GO:BP	developmental growth involved in morphogenesis
MSBB.ExN	7.58305e-07	4292	2883	811	GO:0018130	GO:BP	heterocycle biosynthetic process
Mayo.Astro	8.36466e-07	711	305	36	GO:0032990	GO:BP	cell part morphogenesis
Mayo.Oligo	8.51936e-07	334	1009	47	GO:1990778	GO:BP	protein localization to cell periphery
Mayo.Astro	8.73306e-07	265	305	21	GO:0007611	GO:BP	learning or memory
Mayo.ExN	9.03165e-07	622	1314	81	GO:0030425	GO:CC	dendrite
MSBB.ExN	9.0366e-07	273	2968	82	GO:0005096	GO:MF	GTPase activator activity
MSBB.ExN	9.30759e-07	2167	2968	448	GO:0000166	GO:MF	nucleotide binding
Mayo.Oligo	9.31696e-07	519	1009	63	GO:0010975	GO:BP	regulation of neuron projection development
MSBB.ExN	9.42286e-07	5736	2883	1053	GO:0006139	GO:BP	nucleobase-containing compound metabolic process
MSBB.ExN	9.57586e-07	2168	2968	448	GO:1901265	GO:MF	nucleoside phosphate binding
Mayo.Oligo	9.86556e-07	1031	1009	103	GO:0007417	GO:BP	central nervous system development
MSBB.ExN	9.87178e-07	198	2975	62	GO:0030027	GO:CC	lamellipodium
MSBB.Oligo	9.99177e-07	2372	512	109	GO:0031410	GO:CC	cytoplasmic vesicle
MSBB.Oligo	9.99177e-07	2375	512	109	GO:0097708	GO:CC	intracellular vesicle
Mayo.ExN	1.01457e-06	624	1314	81	GO:0097447	GO:CC	dendritic tree
Mayo.ExN	1.01841e-06	4539	1314	399	GO:0012505	GO:CC	endomembrane system
Mayo.ExN	1.0201e-06	217	1314	39	GO:0030658	GO:CC	transport vesicle membrane
MSBB.ExN	1.068e-06	370	2975	99	GO:0099572	GO:CC	postsynaptic specialization
MSBB.Oligo	1.06846e-06	366	505	32	GO:0090130	GO:BP	tissue migration
ROSMAP.ExN	1.07081e-06	115	820	21	GO:0030672	GO:CC	synaptic vesicle membrane
ROSMAP.ExN	1.07081e-06	115	820	21	GO:0099501	GO:CC	exocytic vesicle membrane
MSBB.ExN	1.09502e-06	334	2883	94	GO:1990778	GO:BP	protein localization to cell periphery
MSBB.Oligo	1.10054e-06	4421	505	180	GO:0048583	GO:BP	regulation of response to stimulus
MSBB.ExN	1.11724e-06	4531	2883	850	GO:0048869	GO:BP	cellular developmental process
MSBB.ExN	1.15748e-06	4302	2883	811	GO:0019438	GO:BP	aromatic compound biosynthetic process
MSBB.ExN	1.15748e-06	778	2883	184	GO:0007017	GO:BP	microtubule-based process
MSBB.ExN	1.18139e-06	1694	2975	347	GO:0098805	GO:CC	whole membrane
MSBB.ExN	1.22141e-06	1770	2883	369	GO:0065003	GO:BP	protein-containing complex assembly
MSBB.Oligo	1.23006e-06	686	505	47	GO:0048729	GO:BP	tissue morphogenesis
ROSMAP.ExN	1.2409e-06	2889	792	191	GO:0051641	GO:BP	cellular localization
MSBB.Astro	1.28141e-06	24	204	7	GO:0042611	GO:CC	MHC protein complex
MSBB.ExN	1.28662e-06	6269	2883	1140	GO:1901576	GO:BP	organic substance biosynthetic process
MSBB.ExN	1.33905e-06	5207	2883	963	GO:0090304	GO:BP	nucleic acid metabolic process
MSBB.ExN	1.33905e-06	508	2883	130	GO:0022604	GO:BP	regulation of cell morphogenesis
MSBB.ExN	1.3495e-06	6308	2968	1165	GO:0043167	GO:MF	ion binding
MSBB.Oligo	1.35492e-06	1168	505	67	GO:1901698	GO:BP	response to nitrogen compound
MSBB.ExN	1.35736e-06	1905	2883	393	GO:0007049	GO:BP	cell cycle
MSBB.ExN	1.41245e-06	5910	2883	1080	GO:0046483	GO:BP	heterocycle metabolic process
MSBB.Oligo	1.41324e-06	472	505	37	GO:0001667	GO:BP	ameboidal-type cell migration
MSBB.Oligo	1.41382e-06	6296	505	237	GO:0007165	GO:BP	signal transduction
MSBB.Oligo	1.41382e-06	1746	505	89	GO:1901700	GO:BP	response to oxygen-containing compound
MSBB.ExN	1.43102e-06	633	2883	155	GO:1905114	GO:BP	cell surface receptor signaling pathway involved in cell-cell signaling
MSBB.ExN	1.4312e-06	1751	2883	365	GO:0051247	GO:BP	positive regulation of protein metabolic process
ROSMAP.ExN	1.43721e-06	1409	792	110	GO:0030182	GO:BP	neuron differentiation
MSBB.ExN	1.44906e-06	968	2883	220	GO:0044087	GO:BP	regulation of cellular component biogenesis
MSBB.ExN	1.49874e-06	6371	2883	1156	GO:0009058	GO:BP	biosynthetic process
MSBB.ExN	1.52155e-06	1586	2975	327	GO:0005794	GO:CC	Golgi apparatus
MSBB.ExN	1.53973e-06	2372	2975	465	GO:0031410	GO:CC	cytoplasmic vesicle
MSBB.ExN	1.53973e-06	417	2975	108	GO:0030055	GO:CC	cell-substrate junction
MSBB.ExN	1.55718e-06	1736	2883	362	GO:0009967	GO:BP	positive regulation of signal transduction
MSBB.ExN	1.6048e-06	770	2975	177	GO:0005815	GO:CC	microtubule organizing center
MSBB.ExN	1.6048e-06	2092	2975	416	GO:0098588	GO:CC	bounding membrane of organelle
Mayo.ExN	1.61265e-06	276	1266	48	GO:0006836	GO:BP	neurotransmitter transport
MSBB.ExN	1.61343e-06	506	2968	131	GO:0050839	GO:MF	cell adhesion molecule binding
MSBB.ExN	1.66073e-06	560	2968	142	GO:0003682	GO:MF	chromatin binding
MSBB.ExN	1.69422e-06	2375	2975	465	GO:0097708	GO:CC	intracellular vesicle
MSBB.ExN	1.69422e-06	4539	2975	831	GO:0012505	GO:CC	endomembrane system
MSBB.ExN	1.73579e-06	550	2883	138	GO:1903827	GO:BP	regulation of cellular protein localization
ROSMAP.ExN	1.78311e-06	427	820	45	GO:0005874	GO:CC	microtubule
ROSMAP.ExN	1.78311e-06	12584	820	617	GO:0043227	GO:CC	membrane-bounded organelle
MSBB.Oligo	1.78359e-06	1947	505	96	GO:0051049	GO:BP	regulation of transport
Mayo.ExN	1.86064e-06	2541	1266	251	GO:0051128	GO:BP	regulation of cellular component organization
Mayo.ExN	1.86064e-06	514	1266	73	GO:0006914	GO:BP	autophagy
Mayo.ExN	1.86064e-06	643	1266	86	GO:0051640	GO:BP	organelle localization
Mayo.ExN	1.86064e-06	2889	1266	279	GO:0051641	GO:BP	cellular localization
Mayo.ExN	1.86064e-06	514	1266	73	GO:0061919	GO:BP	process utilizing autophagic mechanism
Mayo.ExN	1.86064e-06	3241	1266	307	GO:0044085	GO:BP	cellular component biogenesis
Mayo.ExN	1.8836e-06	110	1266	27	GO:0046928	GO:BP	regulation of neurotransmitter secretion
Mayo.ExN	1.93861e-06	83	1266	23	GO:2000300	GO:BP	regulation of synaptic vesicle exocytosis
MSBB.ExN	1.94463e-06	395	2883	106	GO:0031346	GO:BP	positive regulation of cell projection organization
Mayo.ExN	1.97724e-06	133	573	30	KEGG:00190	KEGG	Oxidative phosphorylation
MSBB.Oligo	1.97768e-06	744	505	49	GO:0007169	GO:BP	transmembrane receptor protein tyrosine kinase signaling pathway
ROSMAP.ExN	1.98677e-06	1146	792	94	GO:0048666	GO:BP	neuron development
Mayo.ExN	2.05503e-06	4012	1314	357	GO:0005654	GO:CC	nucleoplasm
Mayo.Oligo	2.06064e-06	390	1057	50	GO:0097060	GO:CC	synaptic membrane
MSBB.ExN	2.11208e-06	295	1295	88	KEGG:04010	KEGG	MAPK signaling pathway
Mayo.ExN	2.15142e-06	335	1266	54	GO:0010506	GO:BP	regulation of autophagy
Mayo.Astro	2.15526e-06	4156	305	114	GO:0065008	GO:BP	regulation of biological quality
Mayo.ExN	2.16391e-06	1325	1266	148	GO:0033043	GO:BP	regulation of organelle organization
MSBB.ExN	2.23153e-06	4727	2883	880	GO:0010468	GO:BP	regulation of gene expression
Mayo.Astro	2.24721e-06	324	315	21	GO:1902495	GO:CC	transmembrane transporter complex
MSBB.Oligo	2.25256e-06	21	512	8	GO:0098644	GO:CC	complex of collagen trimers
Mayo.ExN	2.30609e-06	850	1266	105	GO:0031329	GO:BP	regulation of cellular catabolic process
Mayo.ExN	2.35126e-06	1781	1266	187	GO:0046907	GO:BP	intracellular transport
Mayo.ExN	2.4005e-06	523	1314	70	GO:0043025	GO:CC	neuronal cell body
MSBB.ExN	2.41447e-06	12628	2883	2153	GO:0065007	GO:BP	biological regulation
Mayo.Astro	2.54584e-06	487	310	28	GO:0022803	GO:MF	passive transmembrane transporter activity
Mayo.Astro	2.54584e-06	486	310	28	GO:0015267	GO:MF	channel activity
MSBB.ExN	2.64136e-06	1060	2883	236	GO:0009790	GO:BP	embryo development
MSBB.ExN	2.69204e-06	422	2975	108	GO:0005774	GO:CC	vacuolar membrane
MSBB.Oligo	2.70647e-06	991	505	59	GO:0060284	GO:BP	regulation of cell development
MSBB.ExN	2.78332e-06	724	2975	167	GO:0048471	GO:CC	perinuclear region of cytoplasm
MSBB.Oligo	2.85802e-06	3244	505	140	GO:0009966	GO:BP	regulation of signal transduction
Mayo.ExN	2.90389e-06	215	1266	40	GO:0051648	GO:BP	vesicle localization
MSBB.Oligo	2.94314e-06	41	508	11	GO:0030020	GO:MF	extracellular matrix structural constituent conferring tensile strength
Mayo.Astro	3.02418e-06	615	305	32	GO:0007610	GO:BP	behavior
Mayo.ExN	3.03189e-06	1153	1314	127	GO:0098590	GO:CC	plasma membrane region
MSBB.ExN	3.03233e-06	471	2883	121	GO:0016570	GO:BP	histone modification
MSBB.ExN	3.1083e-06	5956	2883	1084	GO:0006725	GO:BP	cellular aromatic compound metabolic process
Mayo.Oligo	3.11776e-06	5357	1009	381	GO:0044267	GO:BP	cellular protein metabolic process
ROSMAP.ExN	3.188e-06	643	792	62	GO:0051640	GO:BP	organelle localization
Mayo.Oligo	3.20333e-06	2923	1009	230	GO:0008104	GO:BP	protein localization
Mayo.Oligo	3.21657e-06	3679	1009	278	GO:0023051	GO:BP	regulation of signaling
ROSMAP.ExN	3.22216e-06	1327	820	99	GO:0030054	GO:CC	cell junction
MSBB.Oligo	3.24791e-06	1457	505	77	GO:0051094	GO:BP	positive regulation of developmental process
MSBB.ExN	3.2613e-06	48	2883	24	GO:0047496	GO:BP	vesicle transport along microtubule
MSBB.ExN	3.26718e-06	6508	2883	1175	GO:0034641	GO:BP	cellular nitrogen compound metabolic process
Mayo.Astro	3.27377e-06	332	315	21	GO:1990351	GO:CC	transporter complex
Mayo.Oligo	3.34802e-06	856	1009	88	GO:0050767	GO:BP	regulation of neurogenesis
Mayo.Astro	3.35643e-06	1723	305	61	GO:0006811	GO:BP	ion transport
Mayo.ExN	3.38992e-06	3292	1266	309	GO:0033036	GO:BP	macromolecule localization
MSBB.ExN	3.40611e-06	291	2883	83	GO:0031503	GO:BP	protein-containing complex localization
MSBB.ExN	3.426e-06	4454	2883	832	GO:1901362	GO:BP	organic cyclic compound biosynthetic process
MSBB.ExN	3.5473e-06	2381	2968	482	GO:0016740	GO:MF	transferase activity
Mayo.Oligo	3.57138e-06	2820	1009	223	GO:0009653	GO:BP	anatomical structure morphogenesis
Mayo.Oligo	3.66053e-06	253	1009	38	GO:0016358	GO:BP	dendrite development
Mayo.ExN	3.68291e-06	592	1314	76	GO:0044297	GO:CC	cell body
Mayo.ExN	3.72651e-06	1770	1266	185	GO:0065003	GO:BP	protein-containing complex assembly
MSBB.ExN	3.85844e-06	643	2883	155	GO:0051640	GO:BP	organelle localization
Mayo.Astro	3.9618e-06	129	315	13	GO:0099634	GO:CC	postsynaptic specialization membrane
MSBB.Oligo	4.03659e-06	4156	505	169	GO:0065008	GO:BP	regulation of biological quality
Mayo.Oligo	4.11639e-06	679	1009	74	GO:0030036	GO:BP	actin cytoskeleton organization
MSBB.ExN	4.15217e-06	2506	2883	496	GO:0071705	GO:BP	nitrogen compound transport
MSBB.ExN	4.15217e-06	4714	2883	875	GO:0016070	GO:BP	RNA metabolic process
MSBB.ExN	4.15217e-06	430	2883	112	GO:0050808	GO:BP	synapse organization
MSBB.ExN	4.15217e-06	311	2883	87	GO:0010769	GO:BP	regulation of cell morphogenesis involved in differentiation
MSBB.ExN	4.15217e-06	850	2883	195	GO:0031329	GO:BP	regulation of cellular catabolic process
MSBB.ExN	4.20542e-06	406	2883	107	GO:0043547	GO:BP	positive regulation of GTPase activity
MSBB.ExN	4.3705e-06	599	2883	146	GO:0045936	GO:BP	negative regulation of phosphate metabolic process
MSBB.ExN	4.47219e-06	293	2883	83	GO:0010976	GO:BP	positive regulation of neuron projection development
Mayo.Astro	4.51158e-06	2215	305	72	GO:0048468	GO:BP	cell development
Mayo.ExN	4.59027e-06	559	1266	76	GO:0060627	GO:BP	regulation of vesicle-mediated transport
Mayo.ExN	4.59027e-06	3000	1266	285	GO:0022607	GO:BP	cellular component assembly
Mayo.ExN	4.60577e-06	68	1266	20	GO:0017156	GO:BP	calcium-ion regulated exocytosis
MSBB.ExN	4.61393e-06	2841	2968	563	GO:0043168	GO:MF	anion binding
MSBB.Oligo	4.71498e-06	1008	505	59	GO:0051050	GO:BP	positive regulation of transport
MSBB.Oligo	4.79252e-06	584	505	41	GO:0042060	GO:BP	wound healing
MSBB.ExN	4.79664e-06	59	2883	27	GO:0099518	GO:BP	vesicle cytoskeletal trafficking
MSBB.ExN	4.79664e-06	600	2883	146	GO:0010563	GO:BP	negative regulation of phosphorus metabolic process
Mayo.Oligo	4.87211e-06	6105	1009	424	GO:0048856	GO:BP	anatomical structure development
MSBB.Oligo	4.96613e-06	1085	505	62	GO:0010243	GO:BP	response to organonitrogen compound
Mayo.Astro	5.02241e-06	444	310	26	GO:0005216	GO:MF	ion channel activity
MSBB.ExN	5.05794e-06	741	2968	176	GO:0019900	GO:MF	kinase binding
MSBB.ExN	5.05794e-06	2574	2968	515	GO:0036094	GO:MF	small molecule binding
MSBB.ExN	5.05794e-06	6377	2968	1170	GO:0097159	GO:MF	organic cyclic compound binding
Mayo.Astro	5.06285e-06	1578	305	57	GO:0030030	GO:BP	cell projection organization
MSBB.Astro	5.10382e-06	11634	204	162	GO:0005737	GO:CC	cytoplasm
MSBB.Astro	5.10382e-06	111	204	11	GO:0030665	GO:CC	clathrin-coated vesicle membrane
MSBB.ExN	5.10435e-06	4335	2883	810	GO:0030154	GO:BP	cell differentiation
Mayo.Astro	5.17467e-06	1539	305	56	GO:0120036	GO:BP	plasma membrane bounded cell projection organization
MSBB.ExN	5.25694e-06	491	2883	124	GO:0016569	GO:BP	covalent chromatin modification
MSBB.ExN	5.26481e-06	496	2883	125	GO:0050769	GO:BP	positive regulation of neurogenesis
MSBB.ExN	5.27337e-06	226	2883	68	GO:0010001	GO:BP	glial cell differentiation
MSBB.ExN	5.27337e-06	1296	2883	278	GO:0051336	GO:BP	regulation of hydrolase activity
MSBB.ExN	5.27337e-06	253	2883	74	GO:0016358	GO:BP	dendrite development
MSBB.ExN	5.27337e-06	657	2883	157	GO:0043009	GO:BP	chordate embryonic development
MSBB.ExN	5.33704e-06	693	2883	164	GO:0097435	GO:BP	supramolecular fiber organization
MSBB.Oligo	5.43538e-06	866	505	53	GO:0098609	GO:BP	cell-cell adhesion
MSBB.ExN	5.51713e-06	2235	2883	447	GO:0045184	GO:BP	establishment of protein localization
MSBB.ExN	5.51713e-06	7772	2883	1379	GO:0051716	GO:BP	cellular response to stimulus
Mayo.Astro	5.65765e-06	1184	305	47	GO:0034220	GO:BP	ion transmembrane transport
Mayo.Astro	5.65765e-06	1068	305	44	GO:0000902	GO:BP	cell morphogenesis
MSBB.ExN	5.66912e-06	692	2968	166	GO:0008134	GO:MF	transcription factor binding
Mayo.ExN	5.72591e-06	142	573	30	KEGG:05012	KEGG	Parkinson disease
Mayo.ExN	5.72591e-06	231	573	41	KEGG:04714	KEGG	Thermogenesis
MSBB.Oligo	5.82641e-06	2542	505	115	GO:0048584	GO:BP	positive regulation of response to stimulus
Mayo.ExN	5.8458e-06	196	1266	37	GO:0051650	GO:BP	establishment of vesicle localization
Mayo.Astro	6.07293e-06	157	315	14	GO:0042734	GO:CC	presynaptic membrane
MSBB.ExN	6.23198e-06	1002	2968	226	GO:0016772	GO:MF	transferase activity, transferring phosphorus-containing groups
Mayo.Oligo	6.56354e-06	991	1009	97	GO:0060284	GO:BP	regulation of cell development
MSBB.Oligo	6.72456e-06	300	505	27	GO:0090287	GO:BP	regulation of cellular response to growth factor stimulus
MSBB.ExN	6.77143e-06	310	2883	86	GO:0042063	GO:BP	gliogenesis
Mayo.Astro	6.80241e-06	963	305	41	GO:0051960	GO:BP	regulation of nervous system development
Mayo.Astro	6.88871e-06	159	315	14	GO:0099699	GO:CC	integral component of synaptic membrane
MSBB.ExN	7.03889e-06	3744	2883	708	GO:0097659	GO:BP	nucleic acid-templated transcription
Mayo.Oligo	7.11375e-06	1153	1057	107	GO:0098590	GO:CC	plasma membrane region
MSBB.Oligo	7.25455e-06	594	505	41	GO:0007507	GO:BP	heart development
MSBB.ExN	7.26301e-06	529	2883	131	GO:0198738	GO:BP	cell-cell signaling by wnt
MSBB.ExN	7.26519e-06	635	2883	152	GO:0031400	GO:BP	negative regulation of protein modification process
MSBB.ExN	7.39277e-06	101	2883	38	GO:0014020	GO:BP	primary neural tube formation
Mayo.ExN	7.43674e-06	2506	1266	244	GO:0071705	GO:BP	nitrogen compound transport
MSBB.ExN	7.48966e-06	3588	2883	681	GO:1903506	GO:BP	regulation of nucleic acid-templated transcription
MSBB.ExN	7.62266e-06	1781	2883	365	GO:0046907	GO:BP	intracellular transport
MSBB.Oligo	7.6514e-06	1358	505	72	GO:0051241	GO:BP	negative regulation of multicellular organismal process
Mayo.ExN	7.86672e-06	1947	1266	198	GO:0051049	GO:BP	regulation of transport
Mayo.Oligo	7.91626e-06	3638	1009	273	GO:0010646	GO:BP	regulation of cell communication
MSBB.ExN	7.95212e-06	6798	2883	1218	GO:0007154	GO:BP	cell communication
Mayo.Oligo	7.99677e-06	704	1009	75	GO:0031344	GO:BP	regulation of cell projection organization
MSBB.ExN	8.15199e-06	86	2883	34	GO:0072384	GO:BP	organelle transport along microtubule
MSBB.ExN	8.23582e-06	5337	2883	976	GO:0006810	GO:BP	transport
Mayo.Oligo	8.35928e-06	641	1009	70	GO:0072657	GO:BP	protein localization to membrane
Mayo.Astro	8.49556e-06	77	315	10	GO:0099060	GO:CC	integral component of postsynaptic specialization membrane
MSBB.ExN	8.54168e-06	1736	2968	362	GO:0140110	GO:MF	transcription regulator activity
Mayo.Astro	8.59651e-06	684	305	33	GO:0045664	GO:BP	regulation of neuron differentiation
Mayo.ExN	8.70294e-06	419	1266	61	GO:0051656	GO:BP	establishment of organelle localization
Mayo.Oligo	8.88919e-06	6889	1009	468	GO:0051179	GO:BP	localization
Mayo.Astro	8.90758e-06	519	305	28	GO:0010975	GO:BP	regulation of neuron projection development
Mayo.Oligo	9.0543e-06	694	1009	74	GO:0120035	GO:BP	regulation of plasma membrane bounded cell projection organization
MSBB.ExN	9.05982e-06	94	2883	36	GO:0001843	GO:BP	neural tube closure
MSBB.ExN	9.08741e-06	3593	2883	681	GO:2001141	GO:BP	regulation of RNA biosynthetic process
Mayo.ExN	9.21626e-06	4156	1266	373	GO:0065008	GO:BP	regulation of biological quality
MSBB.Oligo	9.23756e-06	6308	508	235	GO:0043167	GO:MF	ion binding
MSBB.Oligo	9.49247e-06	4539	512	174	GO:0012505	GO:CC	endomembrane system
MSBB.ExN	9.70612e-06	527	2883	130	GO:0016055	GO:BP	Wnt signaling pathway
MSBB.ExN	9.70612e-06	6185	2883	1116	GO:1901360	GO:BP	organic cyclic compound metabolic process
MSBB.ExN	9.81491e-06	1317	2883	280	GO:1903507	GO:BP	negative regulation of nucleic acid-templated transcription
Mayo.ExN	9.87708e-06	370	1314	53	GO:0099572	GO:CC	postsynaptic specialization
MSBB.Oligo	9.90945e-06	624	505	42	GO:0071407	GO:BP	cellular response to organic cyclic compound
ROSMAP.ExN	9.919e-06	229	820	29	GO:0070382	GO:CC	exocytic vesicle
MSBB.ExN	1.00396e-05	5008	2883	920	GO:0044271	GO:BP	cellular nitrogen compound biosynthetic process
MSBB.ExN	1.00396e-05	190	2883	59	GO:0030705	GO:BP	cytoskeleton-dependent intracellular transport
MSBB.Oligo	1.01173e-05	232	505	23	GO:0010594	GO:BP	regulation of endothelial cell migration
Mayo.ExN	1.01643e-05	47	1266	16	GO:0014047	GO:BP	glutamate secretion
Mayo.ExN	1.01643e-05	2235	1266	221	GO:0045184	GO:BP	establishment of protein localization
MSBB.ExN	1.03845e-05	675	2883	159	GO:0009792	GO:BP	embryo development ending in birth or egg hatching
MSBB.ExN	1.06388e-05	1264	2883	270	GO:0045892	GO:BP	negative regulation of transcription, DNA-templated
MSBB.Oligo	1.07277e-05	1001	512	56	GO:0099081	GO:CC	supramolecular polymer
Mayo.Astro	1.08856e-05	871	305	38	GO:0098660	GO:BP	inorganic ion transmembrane transport
MSBB.ExN	1.09273e-05	717	2883	167	GO:0098916	GO:BP	anterograde trans-synaptic signaling
MSBB.ExN	1.09273e-05	1319	2883	280	GO:1902679	GO:BP	negative regulation of RNA biosynthetic process
MSBB.ExN	1.09273e-05	774	2883	178	GO:0051345	GO:BP	positive regulation of hydrolase activity
MSBB.ExN	1.09273e-05	717	2883	167	GO:0007268	GO:BP	chemical synaptic transmission
MSBB.Oligo	1.10105e-05	70	508	13	GO:0005518	GO:MF	collagen binding
MSBB.ExN	1.1168e-05	38	2883	20	GO:0035329	GO:BP	hippo signaling
MSBB.ExN	1.12493e-05	564	2883	137	GO:0051493	GO:BP	regulation of cytoskeleton organization
MSBB.Oligo	1.13084e-05	53	505	11	GO:0030199	GO:BP	collagen fibril organization
MSBB.Oligo	1.14636e-05	1241	508	68	GO:0044877	GO:MF	protein-containing complex binding
MSBB.ExN	1.14939e-05	95	2883	36	GO:0060606	GO:BP	tube closure
MSBB.ExN	1.14947e-05	3758	2883	708	GO:0032774	GO:BP	RNA biosynthetic process
MSBB.ExN	1.15918e-05	439	2975	109	GO:0005911	GO:CC	cell-cell junction
Mayo.Oligo	1.16914e-05	286	1057	39	GO:0045211	GO:CC	postsynaptic membrane
Mayo.ExN	1.18661e-05	2923	1266	276	GO:0008104	GO:BP	protein localization
MSBB.Oligo	1.18839e-05	410	505	32	GO:0007517	GO:BP	muscle organ development
MSBB.ExN	1.19914e-05	5008	2883	919	GO:0034645	GO:BP	cellular macromolecule biosynthetic process
MSBB.ExN	1.24791e-05	698	2883	163	GO:0048589	GO:BP	developmental growth
MSBB.Oligo	1.26776e-05	12	512	6	GO:0005583	GO:CC	fibrillar collagen trimer
MSBB.Oligo	1.26776e-05	12	512	6	GO:0098643	GO:CC	banded collagen fibril
MSBB.ExN	1.29958e-05	6772	2883	1211	GO:0023052	GO:BP	signaling
MSBB.ExN	1.32228e-05	5460	2883	994	GO:0051234	GO:BP	establishment of localization
Mayo.Astro	1.33438e-05	81	315	10	GO:0098948	GO:CC	intrinsic component of postsynaptic specialization membrane
Mayo.ExN	1.37677e-05	475	1266	66	GO:0023061	GO:BP	signal release
Mayo.ExN	1.39697e-05	73	1266	20	GO:0036465	GO:BP	synaptic vesicle recycling
Mayo.Oligo	1.40145e-05	2263	1057	181	GO:0005856	GO:CC	cytoskeleton
Mayo.Astro	1.46921e-05	307	315	19	GO:0150034	GO:CC	distal axon
MSBB.Oligo	1.49455e-05	506	508	37	GO:0050839	GO:MF	cell adhesion molecule binding
MSBB.ExN	1.50666e-05	726	2883	168	GO:0099537	GO:BP	trans-synaptic signaling
MSBB.ExN	1.50686e-05	6290	2968	1150	GO:1901363	GO:MF	heterocyclic compound binding
MSBB.Oligo	1.51609e-05	1736	505	85	GO:0009967	GO:BP	positive regulation of signal transduction
MSBB.ExN	1.51886e-05	557	2883	135	GO:0051649	GO:BP	establishment of localization in cell
Mayo.Oligo	1.52314e-05	563	1009	63	GO:0051962	GO:BP	positive regulation of nervous system development
MSBB.Astro	1.53648e-05	25	204	6	GO:0098553	GO:CC	lumenal side of endoplasmic reticulum membrane
MSBB.Astro	1.53648e-05	4539	204	82	GO:0012505	GO:CC	endomembrane system
MSBB.Astro	1.53648e-05	25	204	6	GO:0071556	GO:CC	integral component of lumenal side of endoplasmic reticulum membrane
MSBB.Astro	1.53648e-05	58	204	8	GO:0012507	GO:CC	ER to Golgi transport vesicle membrane
MSBB.ExN	1.5383e-05	1661	2883	341	GO:0042325	GO:BP	regulation of phosphorylation
Mayo.Astro	1.60108e-05	172	315	14	GO:0099240	GO:CC	intrinsic component of synaptic membrane
MSBB.ExN	1.60395e-05	2252	2883	446	GO:0006928	GO:BP	movement of cell or subcellular component
MSBB.Oligo	1.6227e-05	295	505	26	GO:0010632	GO:BP	regulation of epithelial cell migration
MSBB.Oligo	1.63511e-05	1024	505	58	GO:0009725	GO:BP	response to hormone
MSBB.ExN	1.64619e-05	11940	2883	2037	GO:0050789	GO:BP	regulation of biological process
MSBB.ExN	1.65124e-05	563	2883	136	GO:0051962	GO:BP	positive regulation of nervous system development
MSBB.ExN	1.65367e-05	5167	2883	944	GO:0009059	GO:BP	macromolecule biosynthetic process
ROSMAP.ExN	1.6993e-05	7486	820	394	GO:0005634	GO:CC	nucleus
Mayo.ExN	1.70457e-05	76	1314	19	GO:0098982	GO:CC	GABA-ergic synapse
Mayo.Oligo	1.71256e-05	531	1057	59	GO:0098793	GO:CC	presynapse
MSBB.ExN	1.72097e-05	87	2968	34	GO:0008013	GO:MF	beta-catenin binding
Mayo.Oligo	1.7264e-05	647	1057	68	GO:0030424	GO:CC	axon
MSBB.ExN	1.73319e-05	3517	2883	665	GO:0006355	GO:BP	regulation of transcription, DNA-templated
MSBB.ExN	1.78499e-05	243	2883	70	GO:0046578	GO:BP	regulation of Ras protein signal transduction
Mayo.Oligo	1.81023e-05	2480	1009	197	GO:0016310	GO:BP	phosphorylation
MSBB.ExN	1.81961e-05	1642	2883	337	GO:0032270	GO:BP	positive regulation of cellular protein metabolic process
MSBB.Oligo	1.82306e-05	781	505	48	GO:0030029	GO:BP	actin filament-based process
Mayo.ExN	1.8231e-05	348	1314	50	GO:0032279	GO:CC	asymmetric synapse
MSBB.ExN	1.84073e-05	1308	2975	270	GO:0099080	GO:CC	supramolecular complex
Mayo.Astro	1.86753e-05	446	310	25	GO:0046873	GO:MF	metal ion transmembrane transporter activity
Mayo.Astro	1.88015e-05	781	305	35	GO:0098662	GO:BP	inorganic cation transmembrane transport
MSBB.ExN	1.90521e-05	93	2975	34	GO:0030864	GO:CC	cortical actin cytoskeleton
MSBB.Micro	1.90744e-05	14626	362	321	GO:0005622	GO:CC	intracellular
Mayo.Astro	1.9133e-05	856	305	37	GO:0050767	GO:BP	regulation of neurogenesis
Mayo.Astro	1.9133e-05	2541	305	77	GO:0051128	GO:BP	regulation of cellular component organization
MSBB.Oligo	1.92537e-05	2227	505	102	GO:0003008	GO:BP	system process
MSBB.Micro	1.95003e-05	12584	362	287	GO:0043227	GO:CC	membrane-bounded organelle
MSBB.Micro	1.95003e-05	12840	362	291	GO:0043229	GO:CC	intracellular organelle
MSBB.ExN	1.96663e-05	1699	2883	347	GO:0007267	GO:BP	cell-cell signaling
MSBB.ExN	1.96743e-05	745	2883	171	GO:0099536	GO:BP	synaptic signaling
Mayo.Astro	2.00416e-05	104	305	12	GO:0035249	GO:BP	synaptic transmission, glutamatergic
Mayo.ExN	2.01798e-05	173	1266	33	GO:0016241	GO:BP	regulation of macroautophagy
Mayo.Astro	2.02486e-05	6772	305	159	GO:0023052	GO:BP	signaling
Mayo.Oligo	2.02943e-05	801	1009	81	GO:0060322	GO:BP	head development
MSBB.ExN	2.04674e-05	935	2975	202	GO:0005768	GO:CC	endosome
MSBB.ExN	2.13535e-05	3698	2883	695	GO:0006351	GO:BP	transcription, DNA-templated
MSBB.ExN	2.15006e-05	1194	2883	255	GO:0072359	GO:BP	circulatory system development
MSBB.ExN	2.17578e-05	365	2968	97	GO:0140297	GO:MF	DNA-binding transcription factor binding
ROSMAP.ExN	2.21051e-05	213	820	27	GO:0008021	GO:CC	synaptic vesicle
ROSMAP.ExN	2.21051e-05	11067	820	548	GO:0043231	GO:CC	intracellular membrane-bounded organelle
MSBB.Oligo	2.22049e-05	281	505	25	GO:0061448	GO:BP	connective tissue development
MSBB.Oligo	2.22049e-05	1060	505	59	GO:0009790	GO:BP	embryo development
ROSMAP.ExN	2.31775e-05	222	792	30	GO:0099003	GO:BP	vesicle-mediated transport in synapse
MSBB.ExN	2.32284e-05	1017	2883	222	GO:0051338	GO:BP	regulation of transferase activity
MSBB.Oligo	2.34435e-05	801	512	47	GO:0012506	GO:CC	vesicle membrane
Mayo.Astro	2.35154e-05	756	305	34	GO:0007420	GO:BP	brain development
Mayo.Astro	2.35567e-05	27	305	7	GO:0060074	GO:BP	synapse maturation
MSBB.ExN	2.35657e-05	326	2975	85	GO:0005938	GO:CC	cell cortex
MSBB.ExN	2.37486e-05	136	2968	46	GO:0005088	GO:MF	Ras guanyl-nucleotide exchange factor activity
MSBB.ExN	2.3996e-05	1082	2883	234	GO:0000278	GO:BP	mitotic cell cycle
MSBB.ExN	2.41068e-05	86	2975	32	GO:0017053	GO:CC	transcriptional repressor complex
MSBB.Oligo	2.41966e-05	96	505	14	GO:1901888	GO:BP	regulation of cell junction assembly
Mayo.Oligo	2.42948e-05	1245	1009	113	GO:0051130	GO:BP	positive regulation of cellular component organization
MSBB.ExN	2.44887e-05	911	2883	202	GO:0043549	GO:BP	regulation of kinase activity
ROSMAP.ExN	2.45967e-05	4012	820	232	GO:0005654	GO:CC	nucleoplasm
Mayo.Oligo	2.48136e-05	559	1009	62	GO:0060627	GO:BP	regulation of vesicle-mediated transport
MSBB.Oligo	2.50802e-05	202	248	23	KEGG:05205	KEGG	Proteoglycans in cancer
Mayo.Astro	2.51549e-05	6798	305	159	GO:0007154	GO:BP	cell communication
MSBB.ExN	2.52393e-05	119	2975	40	GO:0030863	GO:CC	cortical cytoskeleton
MSBB.Oligo	2.54392e-05	240	512	22	GO:0043292	GO:CC	contractile fiber
MSBB.ExN	2.54487e-05	1153	2975	241	GO:0098590	GO:CC	plasma membrane region
MSBB.Oligo	2.55509e-05	1900	505	90	GO:0010647	GO:BP	positive regulation of cell communication
Mayo.ExN	2.55943e-05	935	1314	104	GO:0005768	GO:CC	endosome
MSBB.Oligo	2.60754e-05	83	505	13	GO:0001570	GO:BP	vasculogenesis
MSBB.Oligo	2.60754e-05	246	505	23	GO:0090092	GO:BP	regulation of transmembrane receptor protein serine/threonine kinase signaling pathway
MSBB.ExN	2.64377e-05	822	2883	185	GO:0006325	GO:BP	chromatin organization
MSBB.ExN	2.67849e-05	152	2883	49	GO:0035148	GO:BP	tube formation
Mayo.ExN	2.6822e-05	1146	1266	127	GO:0048666	GO:BP	neuron development
Mayo.Oligo	2.78835e-05	5604	1009	389	GO:0007275	GO:BP	multicellular organism development
MSBB.Oligo	2.81968e-05	201	508	21	GO:0005516	GO:MF	calmodulin binding
Mayo.ExN	2.82865e-05	101	1314	22	GO:0070469	GO:CC	respirasome
Mayo.ExN	2.84488e-05	344	1314	49	GO:0014069	GO:CC	postsynaptic density
ROSMAP.ExN	2.85806e-05	576	792	55	GO:0000226	GO:BP	microtubule cytoskeleton organization
MSBB.Astro	2.86588e-05	175	204	12	GO:0030662	GO:CC	coated vesicle membrane
MSBB.Oligo	2.91294e-05	1907	505	90	GO:0023056	GO:BP	positive regulation of signaling
MSBB.Oligo	2.91294e-05	472	505	34	GO:0003012	GO:BP	muscle system process
ROSMAP.ExN	2.94613e-05	415	820	41	GO:0030133	GO:CC	transport vesicle
Mayo.Astro	2.95369e-05	694	305	32	GO:0120035	GO:BP	regulation of plasma membrane bounded cell projection organization
ROSMAP.ExN	2.96299e-05	201	792	28	GO:0099504	GO:BP	synaptic vesicle cycle
Mayo.Astro	2.97298e-05	5020	305	126	GO:0048731	GO:BP	system development
Mayo.Astro	2.97298e-05	991	305	40	GO:0060284	GO:BP	regulation of cell development
MSBB.ExN	3.01438e-05	2236	2968	448	GO:0140096	GO:MF	catalytic activity, acting on a protein
Mayo.Astro	3.02956e-05	1947	305	63	GO:0051049	GO:BP	regulation of transport
Mayo.Astro	3.0309e-05	991	310	40	GO:0008092	GO:MF	cytoskeletal protein binding
MSBB.Oligo	3.04129e-05	230	505	22	GO:0007160	GO:BP	cell-matrix adhesion
MSBB.ExN	3.04428e-05	655	2968	155	GO:0019901	GO:MF	protein kinase binding
Mayo.Oligo	3.08142e-05	6630	1009	449	GO:0032502	GO:BP	developmental process
Mayo.Oligo	3.08142e-05	191	1009	30	GO:0048167	GO:BP	regulation of synaptic plasticity
Mayo.Oligo	3.15942e-05	102	1057	20	GO:0098839	GO:CC	postsynaptic density membrane
MSBB.Oligo	3.17737e-05	993	512	54	GO:0099512	GO:CC	supramolecular fiber
MSBB.Oligo	3.17849e-05	1633	505	80	GO:0043067	GO:BP	regulation of programmed cell death
ROSMAP.ExN	3.29466e-05	1017	792	82	GO:0031175	GO:BP	neuron projection development
Mayo.ExN	3.31815e-05	98	1266	23	GO:0042775	GO:BP	mitochondrial ATP synthesis coupled electron transport
MSBB.Oligo	3.32127e-05	99	505	14	GO:0007044	GO:BP	cell-substrate junction assembly
MSBB.Oligo	3.32127e-05	99	505	14	GO:0150115	GO:BP	cell-substrate junction organization
Mayo.ExN	3.34047e-05	87	1314	20	GO:0098803	GO:CC	respiratory chain complex
MSBB.ExN	3.34682e-05	176	2968	55	GO:0017048	GO:MF	Rho GTPase binding
MSBB.ExN	3.36382e-05	53	1295	25	KEGG:04330	KEGG	Notch signaling pathway
MSBB.ExN	3.40618e-05	405	2883	103	GO:0018205	GO:BP	peptidyl-lysine modification
Mayo.ExN	3.43609e-05	195	1314	33	GO:0030427	GO:CC	site of polarized growth
Mayo.ExN	3.43609e-05	7486	1314	602	GO:0005634	GO:CC	nucleus
Mayo.Astro	3.46644e-05	922	305	38	GO:0030001	GO:BP	metal ion transport
Mayo.ExN	3.53646e-05	644	1266	81	GO:0010638	GO:BP	positive regulation of organelle organization
Mayo.ExN	3.6022e-05	1017	1266	115	GO:0031175	GO:BP	neuron projection development
Mayo.Oligo	3.61693e-05	5940	1009	408	GO:0019538	GO:BP	protein metabolic process
Mayo.Oligo	3.61693e-05	106	1009	21	GO:0099175	GO:BP	regulation of postsynapse organization
MSBB.ExN	3.63584e-05	2161	2883	427	GO:0015833	GO:BP	peptide transport
MSBB.ExN	3.67879e-05	304	2883	82	GO:0018105	GO:BP	peptidyl-serine phosphorylation
Mayo.Astro	3.68141e-05	704	305	32	GO:0031344	GO:BP	regulation of cell projection organization
MSBB.Oligo	3.73144e-05	198	248	22	KEGG:04510	KEGG	Focal adhesion
Mayo.ExN	3.75933e-05	187	1314	32	GO:0030426	GO:CC	growth cone
ROSMAP.ExN	3.81077e-05	2923	792	185	GO:0008104	GO:BP	protein localization
MSBB.Oligo	3.81997e-05	57	508	11	GO:0050840	GO:MF	extracellular matrix binding
MSBB.Oligo	3.81997e-05	717	508	45	GO:0005509	GO:MF	calcium ion binding
MSBB.Oligo	3.81997e-05	12743	508	406	GO:0005515	GO:MF	protein binding
Mayo.ExN	3.83477e-05	99	1266	23	GO:0042773	GO:BP	ATP synthesis coupled electron transport
MSBB.ExN	3.88253e-05	3356	2883	634	GO:0051239	GO:BP	regulation of multicellular organismal process
Mayo.Astro	3.91252e-05	1700	315	54	GO:0031226	GO:CC	intrinsic component of plasma membrane
MSBB.ExN	3.92902e-05	141	2883	46	GO:0030010	GO:BP	establishment of cell polarity
MSBB.ExN	3.93229e-05	436	2883	109	GO:0001933	GO:BP	negative regulation of protein phosphorylation
MSBB.ExN	3.97219e-05	562	2883	134	GO:0007423	GO:BP	sensory organ development
MSBB.Micro	4.04466e-05	13720	362	304	GO:0043226	GO:CC	organelle
MSBB.Oligo	4.06285e-05	216	505	21	GO:0051216	GO:BP	cartilage development
MSBB.Oligo	4.16075e-05	956	505	54	GO:0033993	GO:BP	response to lipid
MSBB.Oligo	4.16528e-05	181	505	19	GO:0043534	GO:BP	blood vessel endothelial cell migration
Mayo.Oligo	4.17854e-05	107	1009	21	GO:0051963	GO:BP	regulation of synapse assembly
Mayo.ExN	4.18585e-05	148	573	29	KEGG:04723	KEGG	Retrograde endocannabinoid signaling
Mayo.ExN	4.21492e-05	2121	1266	208	GO:0015031	GO:BP	protein transport
MSBB.ExN	4.38398e-05	802	2883	180	GO:0045859	GO:BP	regulation of protein kinase activity
MSBB.ExN	4.40581e-05	457	2883	113	GO:0007265	GO:BP	Ras protein signal transduction
Mayo.ExN	4.41501e-05	145	1314	27	GO:0044306	GO:CC	neuron projection terminus
Mayo.ExN	4.45656e-05	89	1314	20	GO:0005746	GO:CC	mitochondrial respirasome
Mayo.ExN	4.46153e-05	223	1266	38	GO:0017157	GO:BP	regulation of exocytosis
MSBB.ExN	4.52509e-05	4153	1887	928	HPA:035020_21	HPA	placenta; trophoblastic cells[Approved,Low]
MSBB.ExN	4.52509e-05	3943	1887	882	HPA:037010_22	HPA	rectum; glandular cells[Approved,Medium]
MSBB.ExN	4.52509e-05	3519	1887	797	HPA:018010_22	HPA	fallopian tube; glandular cells[Approved,Medium]
MSBB.ExN	4.52509e-05	4422	1887	978	HPA:018010_21	HPA	fallopian tube; glandular cells[Approved,Low]
MSBB.ExN	4.52509e-05	2969	1887	685	HPA:050010_21	HPA	spleen; cells in red pulp[Approved,Low]
MSBB.Astro	4.52534e-05	94	204	9	GO:0030134	GO:CC	COPII-coated ER to Golgi transport vesicle
Mayo.Oligo	4.56379e-05	551	1047	64	GO:0051020	GO:MF	GTPase binding
Mayo.Oligo	4.56379e-05	2381	1047	196	GO:0016740	GO:MF	transferase activity
MSBB.ExN	4.67469e-05	2121	2883	419	GO:0015031	GO:BP	protein transport
MSBB.ExN	4.75537e-05	1693	2883	343	GO:0031327	GO:BP	negative regulation of cellular biosynthetic process
MSBB.ExN	4.75537e-05	330	2883	87	GO:1903829	GO:BP	positive regulation of cellular protein localization
MSBB.ExN	4.78414e-05	493	2883	120	GO:0016311	GO:BP	dephosphorylation
Mayo.Oligo	4.82738e-05	584	1009	63	GO:0007264	GO:BP	small GTPase mediated signal transduction
Mayo.Astro	4.84406e-05	5604	305	136	GO:0007275	GO:BP	multicellular organism development
MSBB.ExN	4.86957e-05	2196	2883	432	GO:0042886	GO:BP	amide transport
MSBB.Astro	4.92076e-05	32	204	6	GO:0098576	GO:CC	lumenal side of membrane
MSBB.Astro	4.92076e-05	189	204	12	GO:0030136	GO:CC	clathrin-coated vesicle
MSBB.Oligo	4.95062e-05	1362	512	67	GO:0045202	GO:CC	synapse
MSBB.ExN	5.07104e-05	4341	1887	960	HPA:029010_21	HPA	nasopharynx; respiratory epithelial cells[Approved,Low]
MSBB.ExN	5.07104e-05	4421	1887	976	HPA:015010_21	HPA	epididymis; glandular cells[Approved,Low]
MSBB.ExN	5.07104e-05	3881	1887	867	HPA:011020_22	HPA	colon; glandular cells[Approved,Medium]
MSBB.ExN	5.07104e-05	4032	1887	897	HPA:013020_21	HPA	endometrium 1; glandular cells[Approved,Low]
MSBB.ExN	5.07104e-05	2932	1887	672	HPA:008030_22	HPA	cerebral cortex; neuronal cells[Approved,Medium]
MSBB.ExN	5.07104e-05	3459	1887	780	HPA:056020_21	HPA	tonsil; non-germinal center cells[Approved,Low]
MSBB.ExN	5.07104e-05	4429	1887	976	HPA:057010_21	HPA	urinary bladder; urothelial cells[Approved,Low]
MSBB.ExN	5.10073e-05	164	2883	51	GO:0010970	GO:BP	transport along microtubule
MSBB.ExN	5.12979e-05	964	2883	210	GO:0033365	GO:BP	protein localization to organelle
MSBB.Oligo	5.24714e-05	780	512	45	GO:0030659	GO:CC	cytoplasmic vesicle membrane
MSBB.ExN	5.25399e-05	419	2883	105	GO:0051656	GO:BP	establishment of organelle localization
MSBB.ExN	5.25399e-05	109	2883	38	GO:0001841	GO:BP	neural tube formation
MSBB.ExN	5.28845e-05	196	2968	59	GO:0051015	GO:MF	actin filament binding
Mayo.Astro	5.2972e-05	77	305	10	GO:0099601	GO:BP	regulation of neurotransmitter receptor activity
Mayo.Astro	5.2972e-05	1634	305	55	GO:0055085	GO:BP	transmembrane transport
Mayo.Astro	5.2972e-05	1177	305	44	GO:0032989	GO:BP	cellular component morphogenesis
Mayo.Astro	5.30096e-05	352	305	21	GO:1904062	GO:BP	regulation of cation transmembrane transport
ROSMAP.ExN	5.32083e-05	307	820	33	GO:0150034	GO:CC	distal axon
MSBB.ExN	5.3368e-05	520	2968	127	GO:0008047	GO:MF	enzyme activator activity
MSBB.ExN	5.4095e-05	101	2883	36	GO:0060996	GO:BP	dendritic spine development
Mayo.Oligo	5.42442e-05	756	1009	76	GO:0007420	GO:BP	brain development
ROSMAP.ExN	5.5019e-05	184	792	26	GO:0022406	GO:BP	membrane docking
MSBB.ExN	5.51887e-05	81	2975	30	GO:0042641	GO:CC	actomyosin
MSBB.Oligo	5.54634e-05	297	505	25	GO:0007162	GO:BP	negative regulation of cell adhesion
MSBB.ExN	5.54933e-05	4000	1887	889	HPA:008030_21	HPA	cerebral cortex; neuronal cells[Approved,Low]
MSBB.ExN	5.61487e-05	58	2975	24	GO:1904115	GO:CC	axon cytoplasm
MSBB.Oligo	5.6256e-05	9731	512	316	GO:0016020	GO:CC	membrane
Mayo.Oligo	5.65107e-05	284	1009	38	GO:0007411	GO:BP	axon guidance
MSBB.Oligo	5.67863e-05	785	512	45	GO:0070161	GO:CC	anchoring junction
Mayo.ExN	5.82194e-05	1539	1266	159	GO:0120036	GO:BP	plasma membrane bounded cell projection organization
MSBB.Oligo	5.82478e-05	1605	505	78	GO:0042981	GO:BP	regulation of apoptotic process
ROSMAP.ExN	5.90828e-05	704	792	62	GO:0031344	GO:BP	regulation of cell projection organization
MSBB.ExN	6.00501e-05	1085	2883	232	GO:0010243	GO:BP	response to organonitrogen compound
MSBB.ExN	6.21291e-05	224	2968	65	GO:0005085	GO:MF	guanyl-nucleotide exchange factor activity
Mayo.ExN	6.2899e-05	752	1314	86	GO:0000139	GO:CC	Golgi membrane
MSBB.ExN	6.32967e-05	275	2883	75	GO:0072659	GO:BP	protein localization to plasma membrane
Mayo.ExN	6.53957e-05	3679	1266	330	GO:0023051	GO:BP	regulation of signaling
MSBB.ExN	6.56074e-05	195	2975	56	GO:0030427	GO:CC	site of polarized growth
Mayo.ExN	6.62722e-05	4780	1314	403	GO:0031981	GO:CC	nuclear lumen
MSBB.ExN	6.63616e-05	586	2975	134	GO:0005813	GO:CC	centrosome
MSBB.ExN	6.63616e-05	94	2975	33	GO:0032587	GO:CC	ruffle membrane
Mayo.Astro	6.65177e-05	165	305	14	GO:0050806	GO:BP	positive regulation of synaptic transmission
Mayo.Oligo	6.66521e-05	286	1009	38	GO:0097485	GO:BP	neuron projection guidance
MSBB.ExN	6.66762e-05	365	2975	91	GO:0098852	GO:CC	lytic vacuole membrane
MSBB.ExN	6.66762e-05	365	2975	91	GO:0005765	GO:CC	lysosomal membrane
Mayo.Astro	6.68927e-05	801	305	34	GO:0060322	GO:BP	head development
MSBB.ExN	6.78997e-05	215	2883	62	GO:0051648	GO:BP	vesicle localization
MSBB.ExN	6.78997e-05	1076	2883	230	GO:0032880	GO:BP	regulation of protein localization
MSBB.Oligo	6.80104e-05	2006	505	92	GO:0006915	GO:BP	apoptotic process
MSBB.Oligo	6.80104e-05	362	505	28	GO:0006936	GO:BP	muscle contraction
Mayo.ExN	6.83277e-05	339	1266	50	GO:0016050	GO:BP	vesicle organization
MSBB.Oligo	6.84304e-05	4548	512	169	GO:0005576	GO:CC	extracellular region
ROSMAP.ExN	6.97318e-05	175	792	25	GO:0140056	GO:BP	organelle localization by membrane tethering
MSBB.Micro	6.98358e-05	793	350	41	GO:0045055	GO:BP	regulated exocytosis
MSBB.Oligo	6.98782e-05	224	505	21	GO:0001649	GO:BP	osteoblast differentiation
Mayo.Astro	7.10452e-05	80	305	10	GO:0008306	GO:BP	associative learning
MSBB.Oligo	7.15041e-05	1235	505	64	GO:1901701	GO:BP	cellular response to oxygen-containing compound
ROSMAP.ExN	7.27896e-05	694	792	61	GO:0120035	GO:BP	regulation of plasma membrane bounded cell projection organization
Mayo.Oligo	7.2974e-05	5020	1009	351	GO:0048731	GO:BP	system development
Mayo.ExN	7.37282e-05	77	1314	18	GO:0048786	GO:CC	presynaptic active zone
MSBB.Oligo	7.39859e-05	410	512	29	GO:0005925	GO:CC	focal adhesion
MSBB.Astro	7.49848e-05	2372	204	50	GO:0031410	GO:CC	cytoplasmic vesicle
MSBB.Astro	7.49848e-05	697	204	23	GO:0005764	GO:CC	lysosome
MSBB.Astro	7.49848e-05	2375	204	50	GO:0097708	GO:CC	intracellular vesicle
MSBB.Astro	7.49848e-05	697	204	23	GO:0000323	GO:CC	lytic vacuole
MSBB.Oligo	7.63431e-05	2896	505	122	GO:0035556	GO:BP	intracellular signal transduction
MSBB.ExN	7.64223e-05	1540	2883	314	GO:2000113	GO:BP	negative regulation of cellular macromolecule biosynthetic process
Mayo.Astro	7.65696e-05	2942	305	83	GO:0032879	GO:BP	regulation of localization
Mayo.Astro	7.65696e-05	63	305	9	GO:1900449	GO:BP	regulation of glutamate receptor signaling pathway
MSBB.ExN	7.77273e-05	3531	2975	646	GO:0031090	GO:CC	organelle membrane
MSBB.ExN	7.85792e-05	99	2975	34	GO:0005912	GO:CC	adherens junction
Mayo.Oligo	7.86967e-05	190	1009	29	GO:0050770	GO:BP	regulation of axonogenesis
MSBB.ExN	7.8767e-05	307	2975	79	GO:0150034	GO:CC	distal axon
MSBB.ExN	7.90841e-05	388	2883	98	GO:0045666	GO:BP	positive regulation of neuron differentiation
MSBB.ExN	7.97837e-05	136	2883	44	GO:0072175	GO:BP	epithelial tube formation
Mayo.ExN	7.99266e-05	553	1266	71	GO:0022411	GO:BP	cellular component disassembly
Mayo.ExN	7.99266e-05	430	1266	59	GO:0050808	GO:BP	synapse organization
Mayo.ExN	8.07659e-05	724	1314	83	GO:0048471	GO:CC	perinuclear region of cytoplasm
ROSMAP.ExN	8.10101e-05	778	792	66	GO:0007017	GO:BP	microtubule-based process
MSBB.Astro	8.11523e-05	108	204	9	GO:0030660	GO:CC	Golgi-associated vesicle membrane
MSBB.Astro	8.11523e-05	37	204	6	GO:0030669	GO:CC	clathrin-coated endocytic vesicle membrane
Mayo.ExN	8.12317e-05	159	1314	28	GO:0099699	GO:CC	integral component of synaptic membrane
ROSMAP.ExN	8.21736e-05	2372	820	148	GO:0031410	GO:CC	cytoplasmic vesicle
Mayo.Astro	8.24325e-05	17	315	5	GO:0098831	GO:CC	presynaptic active zone cytoplasmic component
Mayo.ExN	8.40874e-05	1574	1266	161	GO:0048699	GO:BP	generation of neurons
MSBB.ExN	8.49298e-05	1721	2883	346	GO:0009890	GO:BP	negative regulation of biosynthetic process
ROSMAP.ExN	8.52563e-05	2375	820	148	GO:0097708	GO:CC	intracellular vesicle
Mayo.Astro	8.61273e-05	276	305	18	GO:0006836	GO:BP	neurotransmitter transport
Mayo.ExN	8.6765e-05	422	1314	55	GO:0005774	GO:CC	vacuolar membrane
Mayo.ExN	8.72553e-05	171	573	31	KEGG:05010	KEGG	Alzheimer disease
ROSMAP.ExN	8.93648e-05	390	820	38	GO:0097060	GO:CC	synaptic membrane
MSBB.Oligo	9.15839e-05	134	512	15	GO:0042383	GO:CC	sarcolemma
MSBB.Oligo	9.15839e-05	307	512	24	GO:0005788	GO:CC	endoplasmic reticulum lumen
MSBB.Oligo	9.20142e-05	680	512	40	GO:0098797	GO:CC	plasma membrane protein complex
MSBB.Oligo	9.20142e-05	417	512	29	GO:0030055	GO:CC	cell-substrate junction
MSBB.Oligo	9.23791e-05	1245	505	64	GO:0051130	GO:BP	positive regulation of cellular component organization
ROSMAP.ExN	9.2834e-05	780	820	62	GO:0030659	GO:CC	cytoplasmic vesicle membrane
Mayo.Astro	9.32798e-05	147	305	13	GO:0060078	GO:BP	regulation of postsynaptic membrane potential
MSBB.ExN	9.38527e-05	64	2883	26	GO:0032835	GO:BP	glomerulus development
Mayo.ExN	9.40992e-05	893	1266	102	GO:0061024	GO:BP	membrane organization
Mayo.ExN	9.40992e-05	1578	1266	161	GO:0030030	GO:BP	cell projection organization
Mayo.ExN	9.40992e-05	2161	1266	209	GO:0015833	GO:BP	peptide transport
Mayo.Oligo	9.65361e-05	1371	1009	119	GO:0007010	GO:BP	cytoskeleton organization
MSBB.Oligo	9.8903e-05	229	512	20	GO:0030016	GO:CC	myofibril
MSBB.Oligo	9.8903e-05	1694	512	77	GO:0098805	GO:CC	whole membrane
MSBB.ExN	9.90564e-05	190	2883	56	GO:0050770	GO:BP	regulation of axonogenesis
MSBB.ExN	9.92984e-05	4654	1887	1017	HPA:019010_21	HPA	gallbladder; glandular cells[Approved,Low]
MSBB.ExN	9.92984e-05	4218	1887	930	HPA:032010_21	HPA	pancreas; exocrine glandular cells[Approved,Low]
MSBB.ExN	9.92984e-05	4006	1887	887	HPA:056030_21	HPA	tonsil; squamous epithelial cells[Approved,Low]
MSBB.ExN	9.92984e-05	1656	1887	400	HPA:008050_22	HPA	cerebral cortex; neuropil[Approved,Medium]
Mayo.Astro	0.000101069	1624	315	51	GO:0005887	GO:CC	integral component of plasma membrane
MSBB.ExN	0.000101464	4377	1887	961	HPA:005010_21	HPA	bronchus; respiratory epithelial cells[Approved,Low]
MSBB.ExN	0.000101512	4029	1887	891	HPA:016010_21	HPA	esophagus; squamous epithelial cells[Approved,Low]
Mayo.Oligo	0.000102798	129	1057	22	GO:0099634	GO:CC	postsynaptic specialization membrane
MSBB.ExN	0.000102944	3531	1887	790	HPA:029010_22	HPA	nasopharynx; respiratory epithelial cells[Approved,Medium]
Mayo.ExN	0.000103116	1077	1266	118	GO:0034622	GO:BP	cellular protein-containing complex assembly
Mayo.ExN	0.000103116	145	1266	28	GO:0051588	GO:BP	regulation of neurotransmitter transport
Mayo.Oligo	0.00010393	2027	1009	163	GO:0006468	GO:BP	protein phosphorylation
ROSMAP.ExN	0.000105613	801	820	63	GO:0012506	GO:CC	vesicle membrane
MSBB.ExN	0.000106085	867	2883	190	GO:0016071	GO:BP	mRNA metabolic process
MSBB.ExN	0.000106961	3715	1887	827	HPA:022020_21	HPA	hippocampus; neuronal cells[Approved,Low]
MSBB.ExN	0.000107969	1143	2883	241	GO:0035295	GO:BP	tube development
MSBB.ExN	0.00010869	476	2883	115	GO:0042326	GO:BP	negative regulation of phosphorylation
Mayo.Astro	0.000110051	253	305	17	GO:0016358	GO:BP	dendrite development
MSBB.ExN	0.000110186	456	2883	111	GO:0050804	GO:BP	modulation of chemical synaptic transmission
MSBB.ExN	0.000110186	43	2883	20	GO:0030866	GO:BP	cortical actin cytoskeleton organization
MSBB.ExN	0.000110812	594	2883	138	GO:0007507	GO:BP	heart development
MSBB.Oligo	0.000111433	691	505	42	GO:0048858	GO:BP	cell projection morphogenesis
MSBB.Oligo	0.000111433	194	505	19	GO:0007179	GO:BP	transforming growth factor beta receptor signaling pathway
Mayo.Oligo	0.000112396	399	1009	47	GO:0030900	GO:BP	forebrain development
MSBB.ExN	0.000113821	72	2975	27	GO:0000118	GO:CC	histone deacetylase complex
Mayo.ExN	0.000113972	539	1266	69	GO:0007005	GO:BP	mitochondrion organization
Mayo.Oligo	0.000114012	1076	1009	98	GO:0032880	GO:BP	regulation of protein localization
Mayo.ExN	0.000114831	189	1314	31	GO:0030136	GO:CC	clathrin-coated vesicle
Mayo.ExN	0.000115773	294	1314	42	GO:0030135	GO:CC	coated vesicle
MSBB.Oligo	0.000116054	416	505	30	GO:0060537	GO:BP	muscle tissue development
Mayo.ExN	0.000116457	308	1266	46	GO:0046034	GO:BP	ATP metabolic process
Mayo.ExN	0.000116457	163	1266	30	GO:1903305	GO:BP	regulation of regulated secretory pathway
Mayo.ExN	0.000116457	122	1266	25	GO:0010508	GO:BP	positive regulation of autophagy
ROSMAP.ExN	0.000116773	770	820	61	GO:0005815	GO:CC	microtubule organizing center
Mayo.ExN	0.000116947	2937	1266	270	GO:0071702	GO:BP	organic substance transport
Mayo.ExN	0.000116947	328	1266	48	GO:0032984	GO:BP	protein-containing complex disassembly
Mayo.ExN	0.000116947	2196	1266	211	GO:0042886	GO:BP	amide transport
ROSMAP.ExN	0.000117019	157	820	21	GO:0042734	GO:CC	presynaptic membrane
Mayo.Astro	0.000117286	175	305	14	GO:0007269	GO:BP	neurotransmitter secretion
Mayo.Astro	0.000117286	175	305	14	GO:0099643	GO:BP	signal release from synapse
MSBB.ExN	0.000117601	4374	1887	959	HPA:002010_21	HPA	appendix; glandular cells[Approved,Low]
MSBB.ExN	0.000118244	2243	1887	523	HPA:022010_21	HPA	hippocampus; glial cells[Approved,Low]
MSBB.Oligo	0.000118533	2923	505	122	GO:0009605	GO:BP	response to external stimulus
Mayo.Oligo	0.000118933	388	1009	46	GO:0045666	GO:BP	positive regulation of neuron differentiation
MSBB.Astro	0.000119167	294	204	14	GO:0030135	GO:CC	coated vesicle
Mayo.ExN	0.000119322	1409	1266	146	GO:0030182	GO:BP	neuron differentiation
MSBB.Micro	0.000119629	2372	362	78	GO:0031410	GO:CC	cytoplasmic vesicle
MSBB.Micro	0.000119629	2375	362	78	GO:0097708	GO:CC	intracellular vesicle
MSBB.Oligo	0.000120195	575	505	37	GO:0010035	GO:BP	response to inorganic substance
Mayo.ExN	0.000120534	1245	1266	132	GO:0051130	GO:BP	positive regulation of cellular component organization
MSBB.Oligo	0.000120842	1177	505	61	GO:0010562	GO:BP	positive regulation of phosphorus metabolic process
MSBB.Oligo	0.000120842	1177	505	61	GO:0045937	GO:BP	positive regulation of phosphate metabolic process
MSBB.Astro	0.000120977	3914	204	70	GO:0031982	GO:CC	vesicle
Mayo.Astro	0.000121872	326	315	18	GO:0005938	GO:CC	cell cortex
MSBB.ExN	0.000121997	457	2883	111	GO:0099177	GO:BP	regulation of trans-synaptic signaling
MSBB.ExN	0.000122968	442	2883	108	GO:0009896	GO:BP	positive regulation of catabolic process
Mayo.ExN	0.00012603	172	1314	29	GO:0099240	GO:CC	intrinsic component of synaptic membrane
Mayo.Astro	0.000126574	285	305	18	GO:0021700	GO:BP	developmental maturation
MSBB.Oligo	0.000127596	508	505	34	GO:0022604	GO:BP	regulation of cell morphogenesis
MSBB.Oligo	0.000127596	397	505	29	GO:0014706	GO:BP	striated muscle tissue development
MSBB.ExN	0.000128906	4067	1887	896	HPA:019010_22	HPA	gallbladder; glandular cells[Approved,Medium]
MSBB.ExN	0.000128906	3263	1887	733	HPA:035020_22	HPA	placenta; trophoblastic cells[Approved,Medium]
MSBB.ExN	0.000128906	2535	1887	583	HPA:006010_21	HPA	caudate; glial cells[Approved,Low]
MSBB.ExN	0.000128906	3217	1887	724	HPA:008050_21	HPA	cerebral cortex; neuropil[Approved,Low]
MSBB.ExN	0.000128906	3950	1887	873	HPA:012010_22	HPA	duodenum; glandular cells[Approved,Medium]
MSBB.ExN	0.000128906	2822	1887	643	HPA:007030_21	HPA	cerebellum; cells in molecular layer[Approved,Low]
Mayo.ExN	0.000130044	1723	1266	172	GO:0006811	GO:BP	ion transport
MSBB.Oligo	0.000131441	649	505	40	GO:0006935	GO:BP	chemotaxis
MSBB.Oligo	0.000131441	128	505	15	GO:0001704	GO:BP	formation of primary germ layer
MSBB.ExN	0.000131888	4138	1887	910	HPA:040010_21	HPA	seminal vesicle; glandular cells[Approved,Low]
MSBB.ExN	0.000132076	4579	1887	998	HPA:037010_21	HPA	rectum; glandular cells[Approved,Low]
MSBB.ExN	0.000132452	156	2883	48	GO:0050773	GO:BP	regulation of dendrite development
Mayo.Oligo	0.000133554	935	1057	86	GO:0005768	GO:CC	endosome
MSBB.ExN	0.000133693	748	2883	167	GO:0051129	GO:BP	negative regulation of cellular component organization
MSBB.Astro	0.000134141	1075	204	29	GO:0005789	GO:CC	endoplasmic reticulum membrane
ROSMAP.ExN	0.000134261	1983	792	133	GO:0034613	GO:BP	cellular protein localization
Mayo.Oligo	0.000135466	6889	1009	459	GO:1901564	GO:BP	organonitrogen compound metabolic process
ROSMAP.ExN	0.00013799	1325	792	97	GO:0033043	GO:BP	regulation of organelle organization
MSBB.ExN	0.000138345	1268	2883	263	GO:0051726	GO:BP	regulation of cell cycle
MSBB.Oligo	0.000139321	83	505	12	GO:0048041	GO:BP	focal adhesion assembly
MSBB.Oligo	0.000139417	651	505	40	GO:0042330	GO:BP	taxis
Mayo.Astro	0.000139606	114	114	11	KEGG:04724	KEGG	Glutamatergic synapse
Mayo.ExN	0.00013989	360	1266	51	GO:0001505	GO:BP	regulation of neurotransmitter levels
Mayo.ExN	0.000140128	53	573	15	KEGG:04961	KEGG	Endocrine and other factor-regulated calcium reabsorption
MSBB.Oligo	0.000141194	113	505	14	GO:0045446	GO:BP	endothelial cell differentiation
MSBB.Oligo	0.000142264	1319	505	66	GO:0060429	GO:BP	epithelium development
Mayo.Oligo	0.000143067	173	1057	26	GO:0043197	GO:CC	dendritic spine
ROSMAP.ExN	0.000143547	3292	792	200	GO:0033036	GO:BP	macromolecule localization
MSBB.ExN	0.000145133	1137	2883	239	GO:0070647	GO:BP	protein modification by small protein conjugation or removal
MSBB.ExN	0.000146068	161	2883	49	GO:0018393	GO:BP	internal peptidyl-lysine acetylation
MSBB.ExN	0.000146068	1258	2883	261	GO:0031401	GO:BP	positive regulation of protein modification process
MSBB.ExN	0.000146205	744	2883	166	GO:0007169	GO:BP	transmembrane receptor protein tyrosine kinase signaling pathway
ROSMAP.ExN	0.000147188	2092	820	132	GO:0098588	GO:CC	bounding membrane of organelle
Mayo.Astro	0.000147421	24	305	6	GO:1903859	GO:BP	regulation of dendrite extension
MSBB.ExN	0.000147944	4577	1887	997	HPA:051010_21	HPA	stomach 1; glandular cells[Approved,Low]
MSBB.ExN	0.000148035	403	2975	97	GO:0016607	GO:CC	nuclear speck
MSBB.ExN	0.000148035	1746	2975	340	GO:0005694	GO:CC	chromosome
MSBB.Astro	0.000148472	797	204	24	GO:0005773	GO:CC	vacuole
Mayo.Astro	0.000148574	1031	305	39	GO:0007417	GO:BP	central nervous system development
MSBB.ExN	0.000150399	4373	1887	956	HPA:055010_21	HPA	thyroid gland; glandular cells[Approved,Low]
MSBB.ExN	0.000150399	4568	1887	995	HPA:011020_21	HPA	colon; glandular cells[Approved,Low]
MSBB.ExN	0.00015066	2693	2883	514	GO:0009056	GO:BP	catabolic process
MSBB.Oligo	0.000151556	298	512	23	GO:0030139	GO:CC	endocytic vesicle
MSBB.ExN	0.000151937	225	2883	63	GO:0007163	GO:BP	establishment or maintenance of cell polarity
Mayo.Astro	0.000152297	609	310	28	GO:0022890	GO:MF	inorganic cation transmembrane transporter activity
MSBB.ExN	0.000154631	598	2883	138	GO:0044772	GO:BP	mitotic cell cycle phase transition
MSBB.ExN	0.000154934	187	2975	53	GO:0030426	GO:CC	growth cone
MSBB.Oligo	0.000158144	679	505	41	GO:0030036	GO:BP	actin cytoskeleton organization
Mayo.ExN	0.000158367	517	1314	63	GO:0015629	GO:CC	actin cytoskeleton
Mayo.ExN	0.000161774	1219	1314	124	GO:0031975	GO:CC	envelope
Mayo.ExN	0.000161774	1219	1314	124	GO:0031967	GO:CC	organelle envelope
ROSMAP.ExN	0.000162709	1994	792	133	GO:0070727	GO:BP	cellular macromolecule localization
Mayo.Oligo	0.000163924	156	1009	25	GO:0050773	GO:BP	regulation of dendrite development
MSBB.Oligo	0.000168281	131	505	15	GO:0003231	GO:BP	cardiac ventricle development
MSBB.Oligo	0.000168281	131	505	15	GO:0003158	GO:BP	endothelium development
MSBB.ExN	0.00016856	5672	2883	1016	GO:0010467	GO:BP	gene expression
MSBB.Astro	0.000169126	155	204	10	GO:0030176	GO:CC	integral component of endoplasmic reticulum membrane
MSBB.Astro	0.000169126	1098	204	29	GO:0042175	GO:CC	nuclear outer membrane-endoplasmic reticulum membrane network
MSBB.Astro	0.000169126	752	204	23	GO:0000139	GO:CC	Golgi membrane
MSBB.ExN	0.000170179	944	2883	203	GO:0035239	GO:BP	tube morphogenesis
Mayo.Oligo	0.000171091	175	1057	26	GO:0044309	GO:CC	neuron spine
MSBB.Oligo	0.000173175	563	505	36	GO:0003013	GO:BP	circulatory system process
ROSMAP.ExN	0.000173476	15944	807	752	GO:0005488	GO:MF	binding
Mayo.Oligo	0.000175018	90	1009	18	GO:0106027	GO:BP	neuron projection organization
MSBB.ExN	0.000175769	3469	1887	773	HPA:028020_21	HPA	lymph node; non-germinal center cells[Approved,Low]
MSBB.ExN	0.000176089	4493	1887	979	HPA:001040_21	HPA	adrenal gland; glandular cells[Approved,Low]
MSBB.ExN	0.000176089	2787	1887	633	HPA:035010_21	HPA	placenta; decidual cells[Approved,Low]
MSBB.ExN	0.000177217	1629	2883	327	GO:0010558	GO:BP	negative regulation of macromolecule biosynthetic process
MSBB.ExN	0.000179428	579	2883	134	GO:0010720	GO:BP	positive regulation of cell development
Mayo.ExN	0.000179703	2942	1266	269	GO:0032879	GO:BP	regulation of localization
Mayo.ExN	0.000180731	75	1314	17	GO:0099056	GO:CC	integral component of presynaptic membrane
Mayo.Astro	0.000183563	25	305	6	GO:2000311	GO:BP	regulation of AMPA receptor activity
Mayo.Astro	0.000183563	25	305	6	GO:0048791	GO:BP	calcium ion-regulated exocytosis of neurotransmitter
MSBB.ExN	0.000183956	86	2975	30	GO:0120111	GO:CC	neuron projection cytoplasm
MSBB.ExN	0.000186997	2269	2968	447	GO:0097367	GO:MF	carbohydrate derivative binding
MSBB.ExN	0.000188565	327	2883	84	GO:0018209	GO:BP	peptidyl-serine modification
MSBB.ExN	0.000190864	3625	1887	804	HPA:005010_22	HPA	bronchus; respiratory epithelial cells[Approved,Medium]
MSBB.Oligo	0.000192981	203	505	19	GO:0060541	GO:BP	respiratory system development
Mayo.ExN	0.000195206	118	1266	24	GO:0022904	GO:BP	respiratory electron transport chain
MSBB.ExN	0.000196921	48	2883	21	GO:0099637	GO:BP	neurotransmitter receptor transport
MSBB.ExN	0.000198397	575	2883	133	GO:0030031	GO:BP	cell projection assembly
MSBB.ExN	0.000198406	531	2975	121	GO:0098793	GO:CC	presynapse
ROSMAP.ExN	0.000200762	1586	820	105	GO:0005794	GO:CC	Golgi apparatus
MSBB.Oligo	0.000201256	711	505	42	GO:0032990	GO:BP	cell part morphogenesis
MSBB.ExN	0.000201404	59	2883	24	GO:0098930	GO:BP	axonal transport
MSBB.Oligo	0.000201894	687	505	41	GO:0120039	GO:BP	plasma membrane bounded cell projection morphogenesis
MSBB.Oligo	0.000201894	5681	505	207	GO:0048519	GO:BP	negative regulation of biological process
MSBB.Astro	0.000202369	100	193	10	GO:0002495	GO:BP	antigen processing and presentation of peptide antigen via MHC class II
MSBB.Astro	0.000202369	96	193	10	GO:0019886	GO:BP	antigen processing and presentation of exogenous peptide antigen via MHC class II
MSBB.Astro	0.000202369	102	193	10	GO:0002504	GO:BP	antigen processing and presentation of peptide or polysaccharide antigen via MHC class II
MSBB.ExN	0.000202772	186	2968	55	GO:0019902	GO:MF	phosphatase binding
Mayo.Oligo	0.000203642	496	1009	54	GO:0050769	GO:BP	positive regulation of neurogenesis
Mayo.Astro	0.000205755	91	310	10	GO:0005249	GO:MF	voltage-gated potassium channel activity
Mayo.Astro	0.000205755	660	310	29	GO:0008324	GO:MF	cation transmembrane transporter activity
MSBB.ExN	0.000206501	3416	1887	761	HPA:032020_21	HPA	pancreas; islets of Langerhans[Approved,Low]
MSBB.ExN	0.000206501	3994	1887	878	HPA:014020_21	HPA	endometrium 2; glandular cells[Approved,Low]
Mayo.Astro	0.000206777	89	315	9	GO:0008076	GO:CC	voltage-gated potassium channel complex
Mayo.ExN	0.000207061	302	1314	42	GO:0034702	GO:CC	ion channel complex
MSBB.ExN	0.000208995	128	2883	41	GO:0001838	GO:BP	embryonic epithelial tube formation
Mayo.Oligo	0.00020977	222	1009	31	GO:0099003	GO:BP	vesicle-mediated transport in synapse
Mayo.Oligo	0.00020977	3292	1009	242	GO:0033036	GO:BP	macromolecule localization
MSBB.ExN	0.000211191	3011	1887	678	HPA:027020_21	HPA	lung; pneumocytes[Approved,Low]
MSBB.ExN	0.000216829	150	2883	46	GO:0048813	GO:BP	dendrite morphogenesis
MSBB.Oligo	0.000217258	1699	505	79	GO:0007267	GO:BP	cell-cell signaling
MSBB.Oligo	0.000217513	224	505	20	GO:0060348	GO:BP	bone development
MSBB.Oligo	0.000220379	1757	505	81	GO:0010941	GO:BP	regulation of cell death
MSBB.Oligo	0.000220379	4996	505	186	GO:0048523	GO:BP	negative regulation of cellular process
Mayo.ExN	0.000224111	92	1314	19	GO:0048475	GO:CC	coated membrane
Mayo.ExN	0.000224111	92	1314	19	GO:0030117	GO:CC	membrane coat
Mayo.ExN	0.000224111	84	1314	18	GO:0098889	GO:CC	intrinsic component of presynaptic membrane
MSBB.ExN	0.000224127	1715	1887	407	HPA:028010_22	HPA	lymph node; germinal center cells[Approved,Medium]
Mayo.Oligo	0.000224256	26	1057	9	GO:0098827	GO:CC	endoplasmic reticulum subcompartment
Mayo.Astro	0.000226065	269	305	17	GO:0032412	GO:BP	regulation of ion transmembrane transporter activity
Mayo.ExN	0.000226371	324	1314	44	GO:1902495	GO:CC	transmembrane transporter complex
Mayo.Astro	0.000227056	3679	305	96	GO:0023051	GO:BP	regulation of signaling
MSBB.Oligo	0.000227792	5460	505	200	GO:0051234	GO:BP	establishment of localization
Mayo.Oligo	0.000230139	615	1009	63	GO:0007610	GO:BP	behavior
MSBB.ExN	0.000230149	2942	2883	555	GO:0032879	GO:BP	regulation of localization
ROSMAP.ExN	0.000230381	6308	807	346	GO:0043167	GO:MF	ion binding
MSBB.ExN	0.00023582	191	2883	55	GO:0099111	GO:BP	microtubule-based transport
MSBB.ExN	0.000235999	4113	1887	901	HPA:004020_21	HPA	breast; glandular cells[Approved,Low]
MSBB.ExN	0.000235999	3554	1887	788	HPA:057010_22	HPA	urinary bladder; urothelial cells[Approved,Medium]
MSBB.ExN	0.000235999	3416	1887	760	HPA:009010_21	HPA	cervix, uterine; glandular cells[Approved,Low]
MSBB.Oligo	0.000236058	170	505	17	GO:0071772	GO:BP	response to BMP
MSBB.Oligo	0.000236058	170	505	17	GO:0071773	GO:BP	cellular response to BMP stimulus
Mayo.ExN	0.000236097	781	1266	90	GO:0098662	GO:BP	inorganic cation transmembrane transport
Mayo.ExN	0.000237597	871	1266	98	GO:0098660	GO:BP	inorganic ion transmembrane transport
Mayo.ExN	0.000237597	60	1266	16	GO:0097479	GO:BP	synaptic vesicle localization
Mayo.Astro	0.000237759	51	315	7	GO:0008328	GO:CC	ionotropic glutamate receptor complex
MSBB.ExN	0.000237925	1206	2883	250	GO:0048646	GO:BP	anatomical structure formation involved in morphogenesis
MSBB.Oligo	0.000240882	3543	512	135	GO:0005615	GO:CC	extracellular space
MSBB.ExN	0.000241386	1020	2883	216	GO:0040007	GO:BP	growth
MSBB.ExN	0.000243788	815	2883	178	GO:0098657	GO:BP	import into cell
MSBB.ExN	0.000243959	3677	2883	680	GO:0048513	GO:BP	animal organ development
MSBB.ExN	0.000243959	562	2883	130	GO:0120031	GO:BP	plasma membrane bounded cell projection assembly
MSBB.ExN	0.000245332	4676	1887	1013	HPA:024020_21	HPA	kidney; cells in tubules[Approved,Low]
MSBB.Astro	0.000245518	163	204	10	GO:0031227	GO:CC	intrinsic component of endoplasmic reticulum membrane
ROSMAP.ExN	0.000245775	638	820	52	GO:0098794	GO:CC	postsynapse
MSBB.ExN	0.000246588	374	2883	93	GO:0031331	GO:BP	positive regulation of cellular catabolic process
MSBB.ExN	0.000246588	414	2883	101	GO:0007015	GO:BP	actin filament organization
MSBB.ExN	0.000246588	196	2883	56	GO:0051650	GO:BP	establishment of vesicle localization
MSBB.Micro	0.000248657	907	350	42	GO:0006887	GO:BP	exocytosis
MSBB.Micro	0.000248657	708	350	36	GO:0002263	GO:BP	cell activation involved in immune response
MSBB.Micro	0.000248657	704	350	36	GO:0002366	GO:BP	leukocyte activation involved in immune response
MSBB.Oligo	0.000249551	1679	505	78	GO:0022008	GO:BP	neurogenesis
MSBB.ExN	0.000250509	1457	2883	295	GO:0051094	GO:BP	positive regulation of developmental process
Mayo.Astro	0.000250817	3638	305	95	GO:0010646	GO:BP	regulation of cell communication
Mayo.Astro	0.000253419	89	114	9	KEGG:05032	KEGG	Morphine addiction
Mayo.Astro	0.000253419	192	114	13	KEGG:04020	KEGG	Calcium signaling pathway
Mayo.Astro	0.000253419	112	114	10	KEGG:04725	KEGG	Cholinergic synapse
ROSMAP.ExN	0.000255974	863	820	65	GO:0036477	GO:CC	somatodendritic compartment
ROSMAP.ExN	0.000256484	693	792	59	GO:0097435	GO:BP	supramolecular fiber organization
ROSMAP.ExN	0.000256484	726	792	61	GO:0099537	GO:BP	trans-synaptic signaling
MSBB.Micro	0.000257395	3914	362	112	GO:0031982	GO:CC	vesicle
MSBB.ExN	0.000257933	3197	2883	598	GO:0007166	GO:BP	cell surface receptor signaling pathway
MSBB.ExN	0.000257933	1076	2883	226	GO:0007167	GO:BP	enzyme linked receptor protein signaling pathway
MSBB.ExN	0.000257933	169	2883	50	GO:0018394	GO:BP	peptidyl-lysine acetylation
MSBB.ExN	0.000257944	3513	1887	779	HPA:004030_21	HPA	breast; myoepithelial cells[Approved,Low]
MSBB.ExN	0.000257944	3508	1887	778	HPA:002010_22	HPA	appendix; glandular cells[Approved,Medium]
MSBB.ExN	0.000257944	3770	1887	831	HPA:007010_21	HPA	cerebellum; Purkinje cells[Approved,Low]
MSBB.ExN	0.000258536	201	2883	57	GO:0031032	GO:BP	actomyosin structure organization
Mayo.Astro	0.000264961	52	315	7	GO:0060076	GO:CC	excitatory synapse
Mayo.Astro	0.000265441	139	310	12	GO:0015085	GO:MF	calcium ion transmembrane transporter activity
MSBB.ExN	0.000267328	2172	2883	421	GO:0010629	GO:BP	negative regulation of gene expression
Mayo.ExN	0.000269201	286	1314	40	GO:0045211	GO:CC	postsynaptic membrane
MSBB.Oligo	0.000269248	517	512	32	GO:0015629	GO:CC	actin cytoskeleton
MSBB.ExN	0.000270272	3441	1887	764	HPA:056010_21	HPA	tonsil; germinal center cells[Approved,Low]
MSBB.ExN	0.000270272	4620	1887	1001	HPA:012010_21	HPA	duodenum; glandular cells[Approved,Low]
Mayo.ExN	0.000270655	2167	1314	199	GO:1903561	GO:CC	extracellular vesicle
ROSMAP.ExN	0.000274755	3914	820	220	GO:0031982	GO:CC	vesicle
ROSMAP.ExN	0.000278321	120	792	19	GO:0031109	GO:BP	microtubule polymerization or depolymerization
ROSMAP.ExN	0.000278321	745	792	62	GO:0099536	GO:BP	synaptic signaling
Mayo.ExN	0.00028054	400	1314	51	GO:0031300	GO:CC	intrinsic component of organelle membrane
Mayo.Astro	0.000283038	27	305	6	GO:2000463	GO:BP	positive regulation of excitatory postsynaptic potential
Mayo.ExN	0.00028551	369	1314	48	GO:0031301	GO:CC	integral component of organelle membrane
MSBB.ExN	0.000286121	4461	1887	969	HPA:053020_21	HPA	testis; cells in seminiferous ducts[Approved,Low]
Mayo.Astro	0.000289119	399	305	21	GO:0030900	GO:BP	forebrain development
MSBB.ExN	0.000289527	3695	1887	815	HPA:006020_21	HPA	caudate; neuronal cells[Approved,Low]
MSBB.Oligo	0.000289751	155	505	16	GO:0030856	GO:BP	regulation of epithelial cell differentiation
MSBB.Oligo	0.000290982	1574	505	74	GO:0048699	GO:BP	generation of neurons
Mayo.ExN	0.000294379	154	1314	26	GO:0043204	GO:CC	perikaryon
Mayo.Astro	0.000294552	53	315	7	GO:0098878	GO:CC	neurotransmitter receptor complex
MSBB.ExN	0.00029484	523	2883	122	GO:0006397	GO:BP	mRNA processing
MSBB.Oligo	0.000295779	579	505	36	GO:0010720	GO:BP	positive regulation of cell development
Mayo.ExN	0.000296564	2172	1314	199	GO:0043230	GO:CC	extracellular organelle
Mayo.ExN	0.000298278	4	1314	4	GO:0060199	GO:CC	clathrin-sculpted glutamate transport vesicle
Mayo.ExN	0.000298278	4	1314	4	GO:0060203	GO:CC	clathrin-sculpted glutamate transport vesicle membrane
Mayo.Oligo	0.000298281	226	1009	31	GO:0010001	GO:BP	glial cell differentiation
Mayo.ExN	0.00029979	442	1266	58	GO:0009896	GO:BP	positive regulation of catabolic process
Mayo.ExN	0.00029979	20	1266	9	GO:0016082	GO:BP	synaptic vesicle priming
Mayo.ExN	0.00029979	687	1266	81	GO:0120039	GO:BP	plasma membrane bounded cell projection morphogenesis
Mayo.ExN	0.00029979	1983	1266	191	GO:0034613	GO:BP	cellular protein localization
Mayo.ExN	0.00029979	48	1266	14	GO:0099637	GO:BP	neurotransmitter receptor transport
MSBB.ExN	0.000299815	230	2883	63	GO:0045665	GO:BP	negative regulation of neuron differentiation
MSBB.ExN	0.000300625	1194	2883	247	GO:0022603	GO:BP	regulation of anatomical structure morphogenesis
MSBB.ExN	0.0003013	3048	1887	683	HPA:024010_21	HPA	kidney; cells in glomeruli[Approved,Low]
ROSMAP.ExN	0.000301306	195	820	23	GO:0030427	GO:CC	site of polarized growth
MSBB.Oligo	0.00030152	556	505	35	GO:0002009	GO:BP	morphogenesis of an epithelium
MSBB.Oligo	0.000305288	76	505	11	GO:0048844	GO:BP	artery morphogenesis
ROSMAP.ExN	0.000305595	968	792	75	GO:0044087	GO:BP	regulation of cellular component biogenesis
ROSMAP.ExN	0.000307912	717	792	60	GO:0007268	GO:BP	chemical synaptic transmission
ROSMAP.ExN	0.000307912	717	792	60	GO:0098916	GO:BP	anterograde trans-synaptic signaling
MSBB.Oligo	0.000309166	6	505	4	GO:0010694	GO:BP	positive regulation of alkaline phosphatase activity
Mayo.ExN	0.00031132	269	1314	38	GO:0098798	GO:CC	mitochondrial protein complex
Mayo.ExN	0.000312241	3638	1266	321	GO:0010646	GO:BP	regulation of cell communication
Mayo.Astro	0.000315849	6481	305	148	GO:0016043	GO:BP	cellular component organization
Mayo.ExN	0.000316268	87	1314	18	GO:0098685	GO:CC	Schaffer collateral - CA1 synapse
MSBB.Oligo	0.000319426	1153	512	56	GO:0098590	GO:CC	plasma membrane region
Mayo.ExN	0.000320259	711	1266	83	GO:0032990	GO:BP	cell part morphogenesis
MSBB.Oligo	0.000324093	582	505	36	GO:0034762	GO:BP	regulation of transmembrane transport
MSBB.ExN	0.000324734	644	2883	145	GO:0010638	GO:BP	positive regulation of organelle organization
Mayo.Astro	0.000324965	278	305	17	GO:0022898	GO:BP	regulation of transmembrane transporter activity
MSBB.ExN	0.000330263	166	2883	49	GO:0006475	GO:BP	internal protein amino acid acetylation
MSBB.ExN	0.000330263	157	2883	47	GO:0016573	GO:BP	histone acetylation
MSBB.Oligo	0.00033069	19	505	6	GO:0036303	GO:BP	lymph vessel morphogenesis
MSBB.Oligo	0.000331168	131	508	15	GO:0044325	GO:MF	ion channel binding
MSBB.Astro	0.000331242	1586	204	36	GO:0005794	GO:CC	Golgi apparatus
Mayo.Oligo	0.000333516	443	1047	52	GO:0031267	GO:MF	small GTPase binding
MSBB.Micro	0.000334605	542	350	30	GO:0002275	GO:BP	myeloid cell activation involved in immune response
MSBB.ExN	0.000335756	613	2883	139	GO:0033674	GO:BP	positive regulation of kinase activity
MSBB.ExN	0.000339846	122	2883	39	GO:0021987	GO:BP	cerebral cortex development
MSBB.ExN	0.000343055	3384	1887	751	HPA:055010_22	HPA	thyroid gland; glandular cells[Approved,Medium]
MSBB.Oligo	0.000344369	856	505	47	GO:0050767	GO:BP	regulation of neurogenesis
MSBB.Oligo	0.000344742	4321	508	165	GO:0043169	GO:MF	cation binding
MSBB.ExN	0.000349115	443	2883	106	GO:0008380	GO:BP	RNA splicing
MSBB.Oligo	0.000350127	335	505	25	GO:0001655	GO:BP	urogenital system development
MSBB.ExN	0.000350752	1793	1887	421	HPA:048040_21	HPA	soft tissue 2; peripheral nerve[Approved,Low]
MSBB.Astro	0.000350939	27	110	6	KEGG:05310	KEGG	Asthma
Mayo.ExN	0.000354279	691	1266	81	GO:0048858	GO:BP	cell projection morphogenesis
Mayo.Oligo	0.000356466	172	1057	25	GO:0099240	GO:CC	intrinsic component of synaptic membrane
Mayo.ExN	0.000357088	15944	1299	1196	GO:0005488	GO:MF	binding
MSBB.ExN	0.000358124	335	2975	82	GO:0031253	GO:CC	cell projection membrane
ROSMAP.ExN	0.000358131	4780	820	260	GO:0031981	GO:CC	nuclear lumen
Mayo.ExN	0.000362346	332	1314	44	GO:1990351	GO:CC	transporter complex
MSBB.Oligo	0.000364623	5337	505	195	GO:0006810	GO:BP	transport
MSBB.ExN	0.000364859	343	2883	86	GO:0060070	GO:BP	canonical Wnt signaling pathway
MSBB.Oligo	0.000366846	492	505	32	GO:0034765	GO:BP	regulation of ion transmembrane transport
Mayo.Oligo	0.000369714	57	1057	13	GO:0099146	GO:CC	intrinsic component of postsynaptic density membrane
Mayo.Oligo	0.000369718	95	1009	18	GO:0048814	GO:BP	regulation of dendrite morphogenesis
MSBB.ExN	0.000369951	378	2883	93	GO:1902903	GO:BP	regulation of supramolecular fiber organization
ROSMAP.ExN	0.000370492	712	807	60	GO:0019904	GO:MF	protein domain specific binding
ROSMAP.ExN	0.000370492	343	807	36	GO:0015631	GO:MF	tubulin binding
Mayo.Astro	0.000374262	508	305	24	GO:0022604	GO:BP	regulation of cell morphogenesis
MSBB.Oligo	0.000374825	177	505	17	GO:0030324	GO:BP	lung development
MSBB.Oligo	0.000376252	611	505	37	GO:0048667	GO:BP	cell morphogenesis involved in neuron differentiation
MSBB.ExN	0.00038423	641	2883	144	GO:0072657	GO:BP	protein localization to membrane
Mayo.Astro	0.000387037	7873	305	172	GO:0032501	GO:BP	multicellular organismal process
Mayo.ExN	0.00039015	2841	1299	267	GO:0043168	GO:MF	anion binding
MSBB.Astro	0.000392412	173	193	12	GO:0002478	GO:BP	antigen processing and presentation of exogenous peptide antigen
MSBB.Astro	0.000392582	2144	204	44	GO:0070062	GO:CC	extracellular exosome
Mayo.Astro	0.000394635	171	305	13	GO:0010469	GO:BP	regulation of signaling receptor activity
Mayo.ExN	0.000396267	1137	1266	120	GO:0070647	GO:BP	protein modification by small protein conjugation or removal
MSBB.Oligo	0.000397638	296	505	23	GO:0072001	GO:BP	renal system development
MSBB.Oligo	0.000397638	109	505	13	GO:0090100	GO:BP	positive regulation of transmembrane receptor protein serine/threonine kinase signaling pathway
MSBB.Oligo	0.000397638	786	505	44	GO:0030855	GO:BP	epithelial cell differentiation
MSBB.Oligo	0.000397638	711	505	41	GO:0043269	GO:BP	regulation of ion transport
Mayo.ExN	0.000402888	1994	1266	191	GO:0070727	GO:BP	cellular macromolecule localization
Mayo.ExN	0.000402888	1068	1266	114	GO:0000902	GO:BP	cell morphogenesis
MSBB.ExN	0.000406061	1867	1887	436	HPA:007020_22	HPA	cerebellum; cells in granular layer[Approved,Medium]
MSBB.ExN	0.000406061	4161	1887	907	HPA:027010_21	HPA	lung; macrophages[Approved,Low]
Mayo.Oligo	0.000418548	1586	1057	128	GO:0005794	GO:CC	Golgi apparatus
Mayo.Oligo	0.000419397	264	1009	34	GO:0021537	GO:BP	telencephalon development
MSBB.ExN	0.000419591	145	2883	44	GO:0072006	GO:BP	nephron development
MSBB.ExN	0.000424132	154	2883	46	GO:0016331	GO:BP	morphogenesis of embryonic epithelium
MSBB.Oligo	0.000427736	217	505	19	GO:0002064	GO:BP	epithelial cell development
MSBB.Oligo	0.000433301	1308	512	61	GO:0099080	GO:CC	supramolecular complex
MSBB.ExN	0.000435782	69	2975	25	GO:0097517	GO:CC	contractile actin filament bundle
MSBB.ExN	0.000435782	42	2975	18	GO:0032590	GO:CC	dendrite membrane
MSBB.ExN	0.000435782	61	2975	23	GO:0032589	GO:CC	neuron projection membrane
MSBB.ExN	0.000435782	69	2975	25	GO:0001725	GO:CC	stress fiber
MSBB.Oligo	0.000437409	237	505	20	GO:1904018	GO:BP	positive regulation of vasculature development
MSBB.ExN	0.000441705	119	2883	38	GO:2000736	GO:BP	regulation of stem cell differentiation
Mayo.Astro	0.000446199	99	315	9	GO:0005912	GO:CC	adherens junction
Mayo.ExN	0.000446228	21	1266	9	GO:1903599	GO:BP	positive regulation of autophagy of mitochondrion
ROSMAP.ExN	0.000449482	1245	792	90	GO:0051130	GO:BP	positive regulation of cellular component organization
ROSMAP.ExN	0.000449482	2215	792	142	GO:0048468	GO:BP	cell development
Mayo.ExN	0.000451254	1679	1266	165	GO:0022008	GO:BP	neurogenesis
MSBB.ExN	0.000452619	4149	1887	904	HPA:039010_21	HPA	salivary gland; glandular cells[Approved,Low]
MSBB.Oligo	0.000454825	2263	512	93	GO:0005856	GO:CC	cytoskeleton
MSBB.ExN	0.000456875	375	2883	92	GO:0030111	GO:BP	regulation of Wnt signaling pathway
ROSMAP.ExN	0.000457021	187	820	22	GO:0030426	GO:CC	growth cone
Mayo.ExN	0.000457907	766	1314	83	GO:0005740	GO:CC	mitochondrial envelope
MSBB.Micro	0.000463576	11067	362	253	GO:0043231	GO:CC	intracellular membrane-bounded organelle
MSBB.Astro	0.000464653	2092	204	43	GO:0098588	GO:CC	bounding membrane of organelle
MSBB.ExN	0.000469446	1756	2968	352	GO:0042802	GO:MF	identical protein binding
MSBB.ExN	0.000469446	173	2968	51	GO:0017137	GO:MF	Rab GTPase binding
MSBB.ExN	0.00047309	2511	1887	570	HPA:048030_21	HPA	soft tissue 2; fibroblasts[Approved,Low]
Mayo.Astro	0.000473378	100	315	9	GO:0034705	GO:CC	potassium channel complex
Mayo.ExN	0.000475403	378	1266	51	GO:1902903	GO:BP	regulation of supramolecular fiber organization
MSBB.Astro	0.00047631	2167	204	44	GO:1903561	GO:CC	extracellular vesicle
MSBB.Astro	0.00048064	180	193	12	GO:0019884	GO:BP	antigen processing and presentation of exogenous antigen
MSBB.Oligo	0.000482943	181	505	17	GO:0030323	GO:BP	respiratory tube development
ROSMAP.ExN	0.000486834	519	792	47	GO:0010975	GO:BP	regulation of neuron projection development
MSBB.Astro	0.000487653	2172	204	44	GO:0043230	GO:CC	extracellular organelle
Mayo.Astro	0.000487952	81	305	9	GO:0008344	GO:BP	adult locomotory behavior
Mayo.Astro	0.000490809	9	305	4	GO:0090129	GO:BP	positive regulation of synapse maturation
Mayo.Astro	0.00049241	4531	305	111	GO:0048869	GO:BP	cellular developmental process
MSBB.Oligo	0.000492723	2152	505	93	GO:0012501	GO:BP	programmed cell death
Mayo.ExN	0.000494274	52	1314	13	GO:0045271	GO:CC	respiratory chain complex I
Mayo.ExN	0.000494274	52	1314	13	GO:0030964	GO:CC	NADH dehydrogenase complex
Mayo.ExN	0.000494274	52	1314	13	GO:0005747	GO:CC	mitochondrial respiratory chain complex I
MSBB.Astro	0.000494521	181	204	10	GO:0005798	GO:CC	Golgi-associated vesicle
MSBB.ExN	0.000501375	692	2883	153	GO:0051347	GO:BP	positive regulation of transferase activity
Mayo.Oligo	0.000502095	718	1047	73	GO:0016773	GO:MF	phosphotransferase activity, alcohol group as acceptor
Mayo.Oligo	0.000502583	3966	1009	281	GO:0006996	GO:BP	organelle organization
MSBB.ExN	0.000502757	68	2968	26	GO:0030374	GO:MF	nuclear receptor transcription coactivator activity
MSBB.Astro	0.000503649	72	110	8	KEGG:05140	KEGG	Leishmaniasis
MSBB.Astro	0.000503649	34	110	6	KEGG:05330	KEGG	Allograft rejection
Mayo.Astro	0.000503745	150	305	12	GO:0048813	GO:BP	dendrite morphogenesis
Mayo.ExN	0.000505491	723	1314	79	GO:0031966	GO:CC	mitochondrial membrane
ROSMAP.ExN	0.000505548	175	792	23	GO:0099643	GO:BP	signal release from synapse
ROSMAP.ExN	0.000505548	175	792	23	GO:0007269	GO:BP	neurotransmitter secretion
MSBB.ExN	0.000509311	366	2883	90	GO:0001654	GO:BP	eye development
ROSMAP.ExN	0.000509955	77	820	13	GO:0048786	GO:CC	presynaptic active zone
MSBB.Micro	0.000512271	498	350	28	GO:0002446	GO:BP	neutrophil mediated immunity
MSBB.ExN	0.000513152	2911	1887	652	HPA:056030_22	HPA	tonsil; squamous epithelial cells[Approved,Medium]
MSBB.ExN	0.000513152	2422	1887	551	HPA:022020_22	HPA	hippocampus; neuronal cells[Approved,Medium]
MSBB.ExN	0.000513152	2010	1887	465	HPA:011030_22	HPA	colon; peripheral nerve/ganglion[Approved,Medium]
MSBB.Astro	0.00051666	56	204	6	GO:0045334	GO:CC	clathrin-coated endocytic vesicle
MSBB.ExN	0.000518782	258	2883	68	GO:0000086	GO:BP	G2/M transition of mitotic cell cycle
MSBB.Astro	0.000520632	36	110	6	KEGG:05332	KEGG	Graft-versus-host disease
MSBB.Oligo	0.000522302	2038	505	89	GO:0008283	GO:BP	cell population proliferation
MSBB.ExN	0.000525851	78	2883	28	GO:0060998	GO:BP	regulation of dendritic spine development
MSBB.ExN	0.000525851	297	2883	76	GO:0034330	GO:BP	cell junction organization
MSBB.Oligo	0.000526864	4227	508	161	GO:0046872	GO:MF	metal ion binding
MSBB.Astro	0.000529318	56	110	7	KEGG:05416	KEGG	Viral myocarditis
MSBB.ExN	0.000535831	30	2883	15	GO:1904837	GO:BP	beta-catenin-TCF complex assembly
MSBB.ExN	0.000537847	142	2883	43	GO:0035023	GO:BP	regulation of Rho protein signal transduction
MSBB.ExN	0.000538023	3392	1887	750	HPA:053020_22	HPA	testis; cells in seminiferous ducts[Approved,Medium]
MSBB.ExN	0.00054205	892	2883	190	GO:1903047	GO:BP	mitotic cell cycle process
Mayo.Astro	0.000542551	102	315	9	GO:0098839	GO:CC	postsynaptic density membrane
MSBB.ExN	0.00054434	838	2883	180	GO:0016032	GO:BP	viral process
MSBB.ExN	0.000547366	6	2883	6	GO:2000739	GO:BP	regulation of mesenchymal stem cell differentiation
ROSMAP.ExN	0.000548684	2246	807	144	GO:0019899	GO:MF	enzyme binding
ROSMAP.ExN	0.000548687	684	792	57	GO:0045664	GO:BP	regulation of neuron differentiation
MSBB.ExN	0.000549269	332	2883	83	GO:0060562	GO:BP	epithelial tube morphogenesis
MSBB.ExN	0.000553353	367	2883	90	GO:0033044	GO:BP	regulation of chromosome organization
Mayo.Astro	0.000553802	126	310	11	GO:0005267	GO:MF	potassium channel activity
MSBB.Micro	0.000561268	1327	362	49	GO:0030054	GO:CC	cell junction
MSBB.Oligo	0.000563077	673	505	39	GO:0048812	GO:BP	neuron projection morphogenesis
MSBB.Oligo	0.000563077	113	505	13	GO:0032963	GO:BP	collagen metabolic process
Mayo.Oligo	0.000565529	417	1057	45	GO:0031252	GO:CC	cell leading edge
MSBB.ExN	0.000568081	993	2975	203	GO:0099512	GO:CC	supramolecular fiber
Mayo.ExN	0.000569443	1631	1314	154	GO:0005739	GO:CC	mitochondrion
MSBB.ExN	0.000569993	212	1295	61	KEGG:04810	KEGG	Regulation of actin cytoskeleton
MSBB.ExN	0.000570952	3744	1887	821	HPA:003010_21	HPA	bone marrow; hematopoietic cells[Approved,Low]
MSBB.Oligo	0.000573887	130	505	14	GO:0010595	GO:BP	positive regulation of endothelial cell migration
Mayo.Astro	0.000577519	293	305	17	GO:0032409	GO:BP	regulation of transporter activity
Mayo.Astro	0.000577519	293	305	17	GO:0010976	GO:BP	positive regulation of neuron projection development
Mayo.Astro	0.000577519	388	305	20	GO:0045666	GO:BP	positive regulation of neuron differentiation
MSBB.ExN	0.000580599	2793	1887	627	HPA:008020_21	HPA	cerebral cortex; glial cells[Approved,Low]
MSBB.Oligo	0.000581182	184	505	17	GO:0061138	GO:BP	morphogenesis of a branching epithelium
Mayo.Astro	0.000581914	1223	310	42	GO:0005215	GO:MF	transporter activity
MSBB.ExN	0.000583517	4543	1887	981	HPA:052010_21	HPA	stomach 2; glandular cells[Approved,Low]
MSBB.Oligo	0.000584833	553	505	34	GO:0008015	GO:BP	blood circulation
Mayo.ExN	0.000584938	114	1299	24	GO:0000149	GO:MF	SNARE binding
Mayo.Oligo	0.000585684	273	1047	36	GO:0005096	GO:MF	GTPase activator activity
Mayo.Oligo	0.000585684	306	1047	39	GO:0030695	GO:MF	GTPase regulator activity
Mayo.Oligo	0.000585684	425	1047	49	GO:0019787	GO:MF	ubiquitin-like protein transferase activity
MSBB.ExN	0.000595348	2799	1887	628	HPA:044010_22	HPA	skin 2; epidermal cells[Approved,Medium]
MSBB.ExN	0.000597844	8	2883	7	GO:0072497	GO:BP	mesenchymal stem cell differentiation
MSBB.ExN	0.000597844	8	2883	7	GO:0072383	GO:BP	plus-end-directed vesicle transport along microtubule
Mayo.Astro	0.00060198	264	305	16	GO:0021537	GO:BP	telencephalon development
Mayo.ExN	0.000602335	4964	1314	407	GO:0043228	GO:CC	non-membrane-bounded organelle
MSBB.ExN	0.000603755	1168	2883	240	GO:1901698	GO:BP	response to nitrogen compound
Mayo.ExN	0.000609479	68	1314	15	GO:0005905	GO:CC	clathrin-coated pit
ROSMAP.ExN	0.00061196	448	792	42	GO:1901990	GO:BP	regulation of mitotic cell cycle phase transition
ROSMAP.ExN	0.00061196	1082	792	80	GO:0000278	GO:BP	mitotic cell cycle
ROSMAP.ExN	0.00061196	95	792	16	GO:0097711	GO:BP	ciliary basal body-plasma membrane docking
Mayo.Oligo	0.00061252	1242	1057	104	GO:0015630	GO:CC	microtubule cytoskeleton
MSBB.ExN	0.000612577	642	2883	143	GO:0044770	GO:BP	cell cycle phase transition
Mayo.Astro	0.000614512	563	305	25	GO:0051962	GO:BP	positive regulation of nervous system development
MSBB.ExN	0.000617796	87	2975	29	GO:0070603	GO:CC	SWI/SNF superfamily-type complex
Mayo.Oligo	0.00061992	428	1047	49	GO:0017016	GO:MF	Ras GTPase binding
Mayo.ExN	0.000621772	89	573	19	KEGG:04727	KEGG	GABAergic synapse
Mayo.ExN	0.000622015	188	1266	31	GO:0022900	GO:BP	electron transport chain
Mayo.ExN	0.000631831	4954	1314	406	GO:0043232	GO:CC	intracellular non-membrane-bounded organelle
MSBB.Oligo	0.000633	727	505	41	GO:1901699	GO:BP	cellular response to nitrogen compound
MSBB.Oligo	0.000633159	1731	505	78	GO:0048585	GO:BP	negative regulation of response to stimulus
MSBB.ExN	0.000635304	2314	2883	442	GO:0044248	GO:BP	cellular catabolic process
MSBB.ExN	0.000635793	873	2883	186	GO:0006974	GO:BP	cellular response to DNA damage stimulus
Mayo.Oligo	0.000637606	213	1057	28	GO:0008021	GO:CC	synaptic vesicle
Mayo.ExN	0.000638695	481	1314	57	GO:0010008	GO:CC	endosome membrane
MSBB.ExN	0.000643186	1493	2883	298	GO:0001932	GO:BP	regulation of protein phosphorylation
ROSMAP.ExN	0.000646913	118	792	18	GO:0098693	GO:BP	regulation of synaptic vesicle cycle
Mayo.Oligo	0.000647559	2896	1009	214	GO:0035556	GO:BP	intracellular signal transduction
Mayo.Oligo	0.00064951	225	1057	29	GO:0034703	GO:CC	cation channel complex
MSBB.Astro	0.000650965	780	204	22	GO:0030659	GO:CC	cytoplasmic vesicle membrane
MSBB.ExN	0.000651278	236	2883	63	GO:0046777	GO:BP	protein autophosphorylation
MSBB.Astro	0.00065331	40	110	6	KEGG:04940	KEGG	Type I diabetes mellitus
MSBB.ExN	0.000655225	29	2975	14	GO:0044295	GO:CC	axonal growth cone
MSBB.ExN	0.000655739	2962	1887	661	HPA:013020_22	HPA	endometrium 1; glandular cells[Approved,Medium]
Mayo.Astro	0.000661633	360	305	19	GO:0001505	GO:BP	regulation of neurotransmitter levels
Mayo.ExN	0.000663387	45	1266	13	GO:0017158	GO:BP	regulation of calcium ion-dependent exocytosis
Mayo.ExN	0.000663573	2144	1314	194	GO:0070062	GO:CC	extracellular exosome
MSBB.ExN	0.000665394	203	2883	56	GO:0006473	GO:BP	protein acetylation
MSBB.ExN	0.000666192	324	2883	81	GO:0051961	GO:BP	negative regulation of nervous system development
MSBB.ExN	0.000666192	241	2883	64	GO:0006469	GO:BP	negative regulation of protein kinase activity
ROSMAP.ExN	0.000667441	963	792	73	GO:0051960	GO:BP	regulation of nervous system development
MSBB.ExN	0.000669639	1657	1887	389	HPA:007030_22	HPA	cerebellum; cells in molecular layer[Approved,Medium]
MSBB.Oligo	0.000672679	99	505	12	GO:0034446	GO:BP	substrate adhesion-dependent cell spreading
MSBB.ExN	0.000690948	180	2883	51	GO:0021543	GO:BP	pallium development
Mayo.Oligo	0.000691463	159	1057	23	GO:0099699	GO:CC	integral component of synaptic membrane
Mayo.Oligo	0.000702369	53	1057	12	GO:0099061	GO:CC	integral component of postsynaptic density membrane
MSBB.Oligo	0.000703391	2027	505	88	GO:0006468	GO:BP	protein phosphorylation
MSBB.Oligo	0.000703803	963	505	50	GO:0051960	GO:BP	regulation of nervous system development
Mayo.Oligo	0.000704224	2246	1047	178	GO:0019899	GO:MF	enzyme binding
MSBB.Astro	0.000706933	365	204	14	GO:0005765	GO:CC	lysosomal membrane
MSBB.Astro	0.000706933	365	204	14	GO:0098852	GO:CC	lytic vacuole membrane
MSBB.Oligo	0.000713905	116	505	13	GO:0060349	GO:BP	bone morphogenesis
MSBB.Astro	0.000714059	175	110	11	KEGG:05152	KEGG	Tuberculosis
MSBB.Astro	0.000714059	87	110	8	KEGG:05150	KEGG	Staphylococcus aureus infection
MSBB.Astro	0.000714059	45	110	6	KEGG:04672	KEGG	Intestinal immune network for IgA production
MSBB.Astro	0.000714059	89	110	8	KEGG:04658	KEGG	Th1 and Th2 cell differentiation
MSBB.Astro	0.000714059	62	110	7	KEGG:05321	KEGG	Inflammatory bowel disease (IBD)
MSBB.Oligo	0.000717366	608	505	36	GO:0048598	GO:BP	embryonic morphogenesis
MSBB.Oligo	0.000717366	1017	505	52	GO:0031175	GO:BP	neuron projection development
Mayo.ExN	0.000721607	2263	1314	203	GO:0005856	GO:CC	cytoskeleton
MSBB.Oligo	0.000722407	207	505	18	GO:0045766	GO:BP	positive regulation of angiogenesis
MSBB.ExN	0.000728958	2215	1887	506	HPA:056020_22	HPA	tonsil; non-germinal center cells[Approved,Medium]
MSBB.ExN	0.000729731	4040	1887	879	HPA:036010_21	HPA	prostate; glandular cells[Approved,Low]
MSBB.ExN	0.000729731	3772	1887	825	HPA:052010_22	HPA	stomach 2; glandular cells[Approved,Medium]
ROSMAP.ExN	0.000729748	1268	792	90	GO:0051726	GO:BP	regulation of cell cycle
Mayo.ExN	0.000737499	673	1266	78	GO:0048812	GO:BP	neuron projection morphogenesis
MSBB.ExN	0.000737601	576	2883	130	GO:0000226	GO:BP	microtubule cytoskeleton organization
MSBB.ExN	0.000741256	370	2883	90	GO:0150063	GO:BP	visual system development
MSBB.Oligo	0.000743873	70	505	10	GO:0035924	GO:BP	cellular response to vascular endothelial growth factor stimulus
Mayo.ExN	0.000745804	104	1266	21	GO:0006900	GO:BP	vesicle budding from membrane
Mayo.ExN	0.000745804	968	1266	104	GO:0044087	GO:BP	regulation of cellular component biogenesis
Mayo.ExN	0.000758801	201	1299	34	GO:0005516	GO:MF	calmodulin binding
MSBB.Micro	0.000759421	484	350	27	GO:0043312	GO:BP	neutrophil degranulation
MSBB.Micro	0.000759421	487	350	27	GO:0002283	GO:BP	neutrophil activation involved in immune response
MSBB.Micro	0.000759421	549	350	29	GO:0002444	GO:BP	myeloid leukocyte mediated immunity
MSBB.Astro	0.000761167	1810	204	38	GO:0005783	GO:CC	endoplasmic reticulum
MSBB.Oligo	0.000771214	562	505	34	GO:0007423	GO:BP	sensory organ development
MSBB.Oligo	0.000771214	3061	505	122	GO:0065009	GO:BP	regulation of molecular function
MSBB.ExN	0.000773183	2816	1887	630	HPA:002020_21	HPA	appendix; lymphoid tissue[Approved,Low]
MSBB.Oligo	0.000773268	152	505	15	GO:0048754	GO:BP	branching morphogenesis of an epithelial tube
Mayo.ExN	0.000774178	12	1314	6	GO:0060198	GO:CC	clathrin-sculpted vesicle
MSBB.ExN	0.00077569	958	2883	201	GO:0023014	GO:BP	signal transduction by protein phosphorylation
MSBB.ExN	0.00077569	2813	2883	527	GO:0071310	GO:BP	cellular response to organic substance
MSBB.Oligo	0.000775823	311	505	23	GO:0010769	GO:BP	regulation of cell morphogenesis involved in differentiation
ROSMAP.ExN	0.0007793	4036	792	231	GO:2000112	GO:BP	regulation of cellular macromolecule biosynthetic process
MSBB.ExN	0.000782142	286	2883	73	GO:0097485	GO:BP	neuron projection guidance
MSBB.ExN	0.000787377	3340	1887	737	HPA:043040_21	HPA	skin 1; melanocytes[Approved,Low]
Mayo.ExN	0.000791846	8	1314	5	GO:0061202	GO:CC	clathrin-sculpted gamma-aminobutyric acid transport vesicle membrane
Mayo.ExN	0.000791846	8	1314	5	GO:0061200	GO:CC	clathrin-sculpted gamma-aminobutyric acid transport vesicle
Mayo.ExN	0.000791846	111	1314	20	GO:0030665	GO:CC	clathrin-coated vesicle membrane
MSBB.Oligo	0.000793203	1861	505	82	GO:0019220	GO:BP	regulation of phosphate metabolic process
MSBB.Astro	0.000795381	192	193	12	GO:0048002	GO:BP	antigen processing and presentation of peptide antigen
Mayo.Oligo	0.000798172	82	1009	16	GO:0097061	GO:BP	dendritic spine organization
MSBB.ExN	0.000799093	284	2968	74	GO:0061629	GO:MF	RNA polymerase II-specific DNA-binding transcription factor binding
MSBB.Micro	0.000802286	532	350	28	GO:0043299	GO:BP	leukocyte degranulation
MSBB.Micro	0.000802286	498	350	27	GO:0042119	GO:BP	neutrophil activation
MSBB.Micro	0.000802286	1281	350	50	GO:0002252	GO:BP	immune effector process
MSBB.Micro	0.000802286	657	350	32	GO:0002274	GO:BP	myeloid leukocyte activation
MSBB.Micro	0.000802286	1567	350	58	GO:0032940	GO:BP	secretion by cell
MSBB.ExN	0.000802679	195	2883	54	GO:0043112	GO:BP	receptor metabolic process
Mayo.ExN	0.000803703	1116	1314	111	GO:0005623	GO:CC	cell
Mayo.ExN	0.000803703	175	1314	27	GO:0030662	GO:CC	coated vesicle membrane
Mayo.ExN	0.000803703	138	1314	23	GO:0098800	GO:CC	inner mitochondrial membrane protein complex
Mayo.Oligo	0.000803826	824	1047	79	GO:0016301	GO:MF	kinase activity
MSBB.Oligo	0.000804872	1862	505	82	GO:0051174	GO:BP	regulation of phosphorus metabolic process
MSBB.Oligo	0.000806969	14	505	5	GO:0061042	GO:BP	vascular wound healing
ROSMAP.ExN	0.000809861	1905	792	124	GO:0007049	GO:BP	cell cycle
Mayo.ExN	0.00081703	48	1314	12	GO:0098563	GO:CC	intrinsic component of synaptic vesicle membrane
Mayo.ExN	0.00081703	17	1314	7	GO:0030132	GO:CC	clathrin coat of coated pit
ROSMAP.ExN	0.000819729	48	792	11	GO:0099637	GO:BP	neurotransmitter receptor transport
MSBB.Oligo	0.000826817	86	505	11	GO:0048644	GO:BP	muscle organ morphogenesis
Mayo.ExN	0.000829571	46	1266	13	GO:0048489	GO:BP	synaptic vesicle transport
Mayo.ExN	0.000829571	1205	1266	124	GO:0006812	GO:BP	cation transport
MSBB.Oligo	0.000830958	741	508	42	GO:0008289	GO:MF	lipid binding
Mayo.Oligo	0.0008343	229	1057	29	GO:0070382	GO:CC	exocytic vesicle
Mayo.Oligo	0.00083544	81	1057	15	GO:0055038	GO:CC	recycling endosome membrane
Mayo.Oligo	0.00083544	81	1057	15	GO:0098948	GO:CC	intrinsic component of postsynaptic specialization membrane
Mayo.Oligo	0.00083544	752	1057	69	GO:0000139	GO:CC	Golgi membrane
Mayo.Oligo	0.00083544	326	1057	37	GO:0005938	GO:CC	cell cortex
Mayo.Astro	0.000843049	611	305	26	GO:0048667	GO:BP	cell morphogenesis involved in neuron differentiation
ROSMAP.ExN	0.000843246	1746	820	110	GO:0005694	GO:CC	chromosome
Mayo.ExN	0.000843653	1182	1266	122	GO:0006886	GO:BP	intracellular protein transport
MSBB.Oligo	0.000846064	102	505	12	GO:0060840	GO:BP	artery development
MSBB.Astro	0.000847453	801	204	22	GO:0012506	GO:CC	vesicle membrane
MSBB.Astro	0.000847453	159	204	9	GO:0030666	GO:CC	endocytic vesicle membrane
MSBB.Oligo	0.000850559	1409	505	66	GO:0030182	GO:BP	neuron differentiation
MSBB.Micro	0.000852532	505	350	27	GO:0036230	GO:BP	granulocyte activation
MSBB.ExN	0.000852762	2028	1887	466	HPA:035010_22	HPA	placenta; decidual cells[Approved,Medium]
MSBB.Oligo	0.000856499	33	505	7	GO:0010039	GO:BP	response to iron ion
MSBB.Oligo	0.000856499	1107	505	55	GO:0042327	GO:BP	positive regulation of phosphorylation
Mayo.Astro	0.000870983	28	315	5	GO:0032809	GO:CC	neuronal cell body membrane
Mayo.Astro	0.000870983	15	315	4	GO:0033268	GO:CC	node of Ranvier
Mayo.Astro	0.000870983	6	315	3	GO:0048788	GO:CC	cytoskeleton of presynaptic active zone
MSBB.Astro	0.000871252	92	204	7	GO:0032588	GO:CC	trans-Golgi network membrane
MSBB.Astro	0.000875163	1694	204	36	GO:0098805	GO:CC	whole membrane
MSBB.ExN	0.000876023	136	2883	41	GO:0042177	GO:BP	negative regulation of protein catabolic process
Mayo.ExN	0.000880518	192	1266	31	GO:0045333	GO:BP	cellular respiration
Mayo.ExN	0.000880518	165	1266	28	GO:0016482	GO:BP	cytosolic transport
Mayo.ExN	0.000880518	711	1266	81	GO:0043269	GO:BP	regulation of ion transport
Mayo.ExN	0.000880518	927	1266	100	GO:0032446	GO:BP	protein modification by small protein conjugation
MSBB.ExN	0.000881886	392	2883	94	GO:0001701	GO:BP	in utero embryonic development
Mayo.Astro	0.00088218	4335	305	106	GO:0030154	GO:BP	cell differentiation
Mayo.Astro	0.00088218	68	305	8	GO:0017156	GO:BP	calcium-ion regulated exocytosis
MSBB.Astro	0.000882442	69	110	7	KEGG:04612	KEGG	Antigen processing and presentation
MSBB.ExN	0.000886127	1001	2975	203	GO:0099081	GO:CC	supramolecular polymer
MSBB.ExN	0.000886127	76	2975	26	GO:0032432	GO:CC	actin filament bundle
MSBB.ExN	0.000886127	248	2975	63	GO:0099568	GO:CC	cytoplasmic region
MSBB.ExN	0.000892245	2096	1887	480	HPA:028020_22	HPA	lymph node; non-germinal center cells[Approved,Medium]
MSBB.Oligo	0.000897295	767	505	42	GO:0045596	GO:BP	negative regulation of cell differentiation
MSBB.Oligo	0.000897295	173	505	16	GO:0003205	GO:BP	cardiac chamber development
MSBB.Astro	0.000902229	95	110	8	KEGG:04640	KEGG	Hematopoietic cell lineage
MSBB.ExN	0.000903308	210	1295	59	KEGG:04015	KEGG	Rap1 signaling pathway
MSBB.ExN	0.000903308	154	1295	47	KEGG:04390	KEGG	Hippo signaling pathway
MSBB.ExN	0.000903308	96	1295	33	KEGG:01522	KEGG	Endocrine resistance
MSBB.ExN	0.0009034	4587	1887	987	HPA:045010_21	HPA	small intestine; glandular cells[Approved,Low]
MSBB.Oligo	0.000903797	1638	508	75	GO:0005102	GO:MF	signaling receptor binding
Mayo.Oligo	0.000918614	4539	1057	309	GO:0012505	GO:CC	endomembrane system
Mayo.Oligo	0.000919003	523	1057	52	GO:0043025	GO:CC	neuronal cell body
MSBB.Astro	0.000920093	49	110	6	KEGG:05320	KEGG	Autoimmune thyroid disease
MSBB.ExN	0.000922924	17	2975	10	GO:0090545	GO:CC	CHD-type complex
MSBB.ExN	0.000922924	17	2975	10	GO:0016581	GO:CC	NuRD complex
MSBB.ExN	0.000924742	68	2975	24	GO:0005905	GO:CC	clathrin-coated pit
MSBB.ExN	0.000925031	752	2975	158	GO:0000139	GO:CC	Golgi membrane
MSBB.ExN	0.000925031	9	2975	7	GO:0032059	GO:CC	bleb
MSBB.Oligo	0.000928739	129	508	14	GO:0017124	GO:MF	SH3 domain binding
MSBB.ExN	0.000929045	198	1295	56	KEGG:04510	KEGG	Focal adhesion
MSBB.ExN	0.000929045	180	1295	52	KEGG:04360	KEGG	Axon guidance
MSBB.ExN	0.000929664	1450	2883	289	GO:0009057	GO:BP	macromolecule catabolic process
MSBB.Oligo	0.00093234	192	248	19	KEGG:04020	KEGG	Calcium signaling pathway
Mayo.ExN	0.000936227	6366	1266	520	GO:0048518	GO:BP	positive regulation of biological process
MSBB.Micro	0.000950197	839	362	35	GO:0030141	GO:CC	secretory granule
MSBB.Oligo	0.000955416	451	505	29	GO:0050673	GO:BP	epithelial cell proliferation
MSBB.Oligo	0.000955416	174	505	16	GO:0010634	GO:BP	positive regulation of epithelial cell migration
MSBB.ExN	0.000958592	141	2883	42	GO:0009185	GO:BP	ribonucleoside diphosphate metabolic process
Mayo.Astro	0.000962122	112	305	10	GO:0099565	GO:BP	chemical synaptic transmission, postsynaptic
MSBB.ExN	0.000964812	1022	2883	212	GO:0045597	GO:BP	positive regulation of cell differentiation
MSBB.ExN	0.00097956	940	2883	197	GO:0000165	GO:BP	MAPK cascade
Mayo.ExN	0.000987415	236	1314	33	GO:0005802	GO:CC	trans-Golgi network
MSBB.ExN	0.000994243	2937	2883	547	GO:0071702	GO:BP	organic substance transport
ROSMAP.ExN	0.000997981	68	792	13	GO:0017156	GO:BP	calcium-ion regulated exocytosis
Mayo.ExN	0.00099844	442	1266	56	GO:0042391	GO:BP	regulation of membrane potential
MSBB.Oligo	0.00100152	73	505	10	GO:0060350	GO:BP	endochondral bone morphogenesis
Mayo.Oligo	0.00100165	360	1009	41	GO:0001505	GO:BP	regulation of neurotransmitter levels
Mayo.Oligo	0.00100165	66	1009	14	GO:0051965	GO:BP	positive regulation of synapse assembly
Mayo.Oligo	0.00100165	3061	1009	223	GO:0065009	GO:BP	regulation of molecular function
Mayo.Oligo	0.00100165	163	1009	24	GO:0001764	GO:BP	neuron migration
Mayo.ExN	0.00100178	42	1314	11	GO:0030118	GO:CC	clathrin coat
MSBB.ExN	0.001002	303	2883	76	GO:0050768	GO:BP	negative regulation of neurogenesis
MSBB.ExN	0.0010052	2862	1887	638	HPA:028010_21	HPA	lymph node; germinal center cells[Approved,Low]
MSBB.Oligo	0.00101991	80	512	10	GO:0005901	GO:CC	caveola
Mayo.Oligo	0.00102243	6772	1009	445	GO:0023052	GO:BP	signaling
MSBB.ExN	0.00102765	42	2883	18	GO:0072583	GO:BP	clathrin-dependent endocytosis
MSBB.Oligo	0.00103418	1225	505	59	GO:0034097	GO:BP	response to cytokine
Mayo.Oligo	0.00103576	475	1009	50	GO:0023061	GO:BP	signal release
MSBB.ExN	0.00103975	16	2883	10	GO:0071786	GO:BP	endoplasmic reticulum tubular network organization
MSBB.ExN	0.00103975	57	2883	22	GO:0030865	GO:BP	cortical cytoskeleton organization
MSBB.ExN	0.00103975	57	2883	22	GO:0061005	GO:BP	cell differentiation involved in kidney development
MSBB.ExN	0.00105268	1241	2968	256	GO:0044877	GO:MF	protein-containing complex binding
MSBB.Oligo	0.00105407	157	505	15	GO:0030509	GO:BP	BMP signaling pathway
Mayo.ExN	0.00106087	61	1266	15	GO:0048488	GO:BP	synaptic vesicle endocytosis
Mayo.ExN	0.00106087	61	1266	15	GO:0140238	GO:BP	presynaptic endocytosis
Mayo.Oligo	0.00107396	1184	1009	101	GO:0034220	GO:BP	ion transmembrane transport
Mayo.Oligo	0.00107396	175	1009	25	GO:0007269	GO:BP	neurotransmitter secretion
Mayo.Oligo	0.00107396	175	1009	25	GO:0099643	GO:BP	signal release from synapse
Mayo.Oligo	0.00107396	968	1009	86	GO:0044087	GO:BP	regulation of cellular component biogenesis
MSBB.Oligo	0.00107518	8	505	4	GO:0048341	GO:BP	paraxial mesoderm formation
MSBB.ExN	0.00108194	284	2883	72	GO:0007411	GO:BP	axon guidance
MSBB.ExN	0.00108566	245	2883	64	GO:0034329	GO:BP	cell junction assembly
MSBB.Oligo	0.00108671	673	505	38	GO:0071417	GO:BP	cellular response to organonitrogen compound
Mayo.Astro	0.00109333	35	305	6	GO:0097484	GO:BP	dendrite extension
MSBB.Oligo	0.00109524	1146	505	56	GO:0048666	GO:BP	neuron development
MSBB.Oligo	0.00109804	409	505	27	GO:0010959	GO:BP	regulation of metal ion transport
MSBB.ExN	0.00109961	4052	1887	879	HPA:044010_21	HPA	skin 2; epidermal cells[Approved,Low]
Mayo.Oligo	0.00109965	582	1009	58	GO:0034762	GO:BP	regulation of transmembrane transport
MSBB.ExN	0.00109987	3099	1887	686	HPA:011030_21	HPA	colon; peripheral nerve/ganglion[Approved,Low]
Mayo.Oligo	0.00110365	413	1009	45	GO:0009100	GO:BP	glycoprotein metabolic process
MSBB.ExN	0.00110484	354	2883	86	GO:0000398	GO:BP	mRNA splicing, via spliceosome
MSBB.ExN	0.00110484	354	2883	86	GO:0000377	GO:BP	RNA splicing, via transesterification reactions with bulged adenosine as nucleophile
Mayo.Oligo	0.00111063	13720	1057	823	GO:0043226	GO:CC	organelle
Mayo.ExN	0.00111926	320	1314	41	GO:0045121	GO:CC	membrane raft
Mayo.ExN	0.00112072	1822	1266	174	GO:0044093	GO:BP	positive regulation of molecular function
MSBB.ExN	0.00112306	3355	1887	738	HPA:015010_22	HPA	epididymis; glandular cells[Approved,Medium]
MSBB.Oligo	0.00112756	24	505	6	GO:0060055	GO:BP	angiogenesis involved in wound healing
ROSMAP.ExN	0.00114286	124	792	18	GO:0016079	GO:BP	synaptic vesicle exocytosis
Mayo.Astro	0.00115837	165	305	12	GO:0051017	GO:BP	actin filament bundle assembly
Mayo.Oligo	0.00115837	900	1009	81	GO:0098655	GO:BP	cation transmembrane transport
MSBB.ExN	0.00115981	519	2883	118	GO:0071900	GO:BP	regulation of protein serine/threonine kinase activity
Mayo.Astro	0.00115987	52	305	7	GO:0048168	GO:BP	regulation of neuronal synaptic plasticity
MSBB.ExN	0.00116901	212	2883	57	GO:0035303	GO:BP	regulation of dephosphorylation
MSBB.Astro	0.00118058	9	198	4	GO:0032395	GO:MF	MHC class II receptor activity
MSBB.ExN	0.00118132	2852	1887	635	HPA:008010_21	HPA	cerebral cortex; endothelial cells[Approved,Low]
Mayo.ExN	0.00118542	233	1266	35	GO:0016197	GO:BP	endosomal transport
MSBB.ExN	0.00118814	375	2883	90	GO:0048880	GO:BP	sensory system development
MSBB.ExN	0.00118814	6296	2883	1107	GO:0007165	GO:BP	signal transduction
Mayo.ExN	0.00118818	321	1314	41	GO:0098857	GO:CC	membrane microdomain
MSBB.ExN	0.00118849	107	2883	34	GO:0008593	GO:BP	regulation of Notch signaling pathway
Mayo.ExN	0.00120565	2246	1299	214	GO:0019899	GO:MF	enzyme binding
Mayo.ExN	0.00120565	431	1299	57	GO:0005543	GO:MF	phospholipid binding
Mayo.Astro	0.00120608	30	315	5	GO:0044298	GO:CC	cell body membrane
MSBB.ExN	0.00120663	90	2883	30	GO:0106027	GO:BP	neuron projection organization
MSBB.Oligo	0.00121417	35	505	7	GO:0030513	GO:BP	positive regulation of BMP signaling pathway
Mayo.Astro	0.00122814	22	305	5	GO:1903861	GO:BP	positive regulation of dendrite extension
MSBB.ExN	0.0012289	320	2883	79	GO:0009895	GO:BP	negative regulation of catabolic process
MSBB.ExN	0.00123755	762	2975	159	GO:0099513	GO:CC	polymeric cytoskeletal fiber
MSBB.ExN	0.0012383	203	2883	55	GO:0051236	GO:BP	establishment of RNA localization
Mayo.ExN	0.00124349	5605	1266	463	GO:0048522	GO:BP	positive regulation of cellular process
MSBB.ExN	0.00124982	3421	2883	628	GO:0010033	GO:BP	response to organic substance
ROSMAP.ExN	0.00126453	794	792	62	GO:0010564	GO:BP	regulation of cell cycle process
MSBB.ExN	0.00126532	261	2883	67	GO:0048863	GO:BP	stem cell differentiation
Mayo.ExN	0.00127241	991	1299	108	GO:0008092	GO:MF	cytoskeletal protein binding
Mayo.ExN	0.00127241	712	1299	83	GO:0019904	GO:MF	protein domain specific binding
Mayo.Astro	0.0012856	5337	305	124	GO:0006810	GO:BP	transport
MSBB.ExN	0.00128592	11	2883	8	GO:0099519	GO:BP	dense core granule cytoskeletal transport
MSBB.ExN	0.00128592	11	2883	8	GO:0032253	GO:BP	dense core granule localization
MSBB.ExN	0.00128592	11	2883	8	GO:1901950	GO:BP	dense core granule transport
Mayo.Astro	0.00128662	6105	305	138	GO:0048856	GO:BP	anatomical structure development
Mayo.Astro	0.00128662	6889	305	152	GO:0051179	GO:BP	localization
Mayo.ExN	0.00128791	365	1314	45	GO:0098852	GO:CC	lytic vacuole membrane
Mayo.ExN	0.00128791	365	1314	45	GO:0005765	GO:CC	lysosomal membrane
MSBB.ExN	0.00128793	7	2975	6	GO:0070776	GO:CC	MOZ/MORF histone acetyltransferase complex
MSBB.ExN	0.00128793	7	2975	6	GO:0070775	GO:CC	H3 histone acetyltransferase complex
MSBB.ExN	0.00128958	82	2883	28	GO:0097061	GO:BP	dendritic spine organization
MSBB.Oligo	0.00129619	4	512	3	GO:0071953	GO:CC	elastic fiber
Mayo.ExN	0.00129788	9731	1314	742	GO:0016020	GO:CC	membrane
Mayo.Astro	0.00130259	168	305	12	GO:0061572	GO:BP	actin filament bundle organization
Mayo.Astro	0.00130259	6667	305	148	GO:0071840	GO:BP	cellular component organization or biogenesis
MSBB.Micro	0.00132167	1616	350	58	GO:0140352	GO:BP	export from cell
Mayo.ExN	0.00132459	2168	1299	206	GO:1901265	GO:MF	nucleoside phosphate binding
Mayo.ExN	0.00132459	2167	1299	206	GO:0000166	GO:MF	nucleotide binding
Mayo.Oligo	0.00133458	442	1009	47	GO:0042391	GO:BP	regulation of membrane potential
MSBB.Oligo	0.00133542	414	505	27	GO:0007015	GO:BP	actin filament organization
MSBB.ExN	0.00133822	91	2975	29	GO:1904949	GO:CC	ATPase complex
MSBB.ExN	0.00133822	797	2975	165	GO:0005773	GO:CC	vacuole
MSBB.Oligo	0.00134114	88	248	12	KEGG:04512	KEGG	ECM-receptor interaction
MSBB.ExN	0.00135382	247	2883	64	GO:0043543	GO:BP	protein acylation
MSBB.ExN	0.00135962	537	2883	121	GO:0045860	GO:BP	positive regulation of protein kinase activity
MSBB.ExN	0.00135962	397	2883	94	GO:0042176	GO:BP	regulation of protein catabolic process
Mayo.Oligo	0.00136471	293	1009	35	GO:0010976	GO:BP	positive regulation of neuron projection development
MSBB.ExN	0.00137517	2963	1887	657	HPA:007020_21	HPA	cerebellum; cells in granular layer[Approved,Low]
MSBB.Oligo	0.0013758	302	512	21	GO:0034702	GO:CC	ion channel complex
MSBB.ExN	0.00137615	70	2883	25	GO:0008088	GO:BP	axo-dendritic transport
MSBB.Oligo	0.00137707	125	505	13	GO:0002062	GO:BP	chondrocyte differentiation
Mayo.Oligo	0.00138003	342	1009	39	GO:0051056	GO:BP	regulation of small GTPase mediated signal transduction
MSBB.ExN	0.00139135	139	2883	41	GO:0009179	GO:BP	purine ribonucleoside diphosphate metabolic process
MSBB.ExN	0.00139135	95	2883	31	GO:0048814	GO:BP	regulation of dendrite morphogenesis
MSBB.ExN	0.00139135	139	2883	41	GO:0009135	GO:BP	purine nucleoside diphosphate metabolic process
MSBB.ExN	0.00139371	262	2883	67	GO:0033673	GO:BP	negative regulation of kinase activity
Mayo.ExN	0.00139435	801	1266	88	GO:0060322	GO:BP	head development
MSBB.Oligo	0.00140286	68	512	9	GO:0005905	GO:CC	clathrin-coated pit
Mayo.ExN	0.0014044	42	1266	12	GO:0072583	GO:BP	clathrin-dependent endocytosis
MSBB.Oligo	0.00141284	370	505	25	GO:0010038	GO:BP	response to metal ion
MSBB.Oligo	0.00141284	200	505	17	GO:0001763	GO:BP	morphogenesis of a branching structure
MSBB.Oligo	0.00141316	25	505	6	GO:0001945	GO:BP	lymph vessel development
MSBB.ExN	0.0014165	449	2883	104	GO:0010256	GO:BP	endomembrane system organization
Mayo.ExN	0.00143211	70	1266	16	GO:0015800	GO:BP	acidic amino acid transport
MSBB.ExN	0.00143554	357	2883	86	GO:0000375	GO:BP	RNA splicing, via transesterification reactions
MSBB.Oligo	0.00144362	2285	505	95	GO:0008219	GO:BP	cell death
ROSMAP.ExN	0.00144543	564	792	48	GO:0051493	GO:BP	regulation of cytoskeleton organization
MSBB.ExN	0.00144947	238	2883	62	GO:0006403	GO:BP	RNA localization
Mayo.Oligo	0.00145362	991	1047	90	GO:0008092	GO:MF	cytoskeletal protein binding
MSBB.ExN	0.00145482	4227	2968	777	GO:0046872	GO:MF	metal ion binding
MSBB.Oligo	0.00146075	684	505	38	GO:0045664	GO:BP	regulation of neuron differentiation
MSBB.Oligo	0.00146075	126	505	13	GO:0002576	GO:BP	platelet degranulation
ROSMAP.ExN	0.00146997	78	338	14	KEGG:04721	KEGG	Synaptic vesicle cycle
Mayo.ExN	0.00147499	126	1314	21	GO:0043679	GO:CC	axon terminus
Mayo.Astro	0.00147792	12	305	4	GO:0016081	GO:BP	synaptic vesicle docking
ROSMAP.ExN	0.00147821	1781	792	116	GO:0046907	GO:BP	intracellular transport
Mayo.Oligo	0.00148084	87	1009	16	GO:0048013	GO:BP	ephrin receptor signaling pathway
Mayo.Oligo	0.00148084	69	1009	14	GO:0099072	GO:BP	regulation of postsynaptic membrane neurotransmitter receptor levels
Mayo.Oligo	0.00148084	781	1009	72	GO:0098662	GO:BP	inorganic cation transmembrane transport
Mayo.Oligo	0.00148084	1493	1009	121	GO:0001932	GO:BP	regulation of protein phosphorylation
ROSMAP.ExN	0.00148182	1407	792	96	GO:0022402	GO:BP	cell cycle process
MSBB.ExN	0.00149099	3857	1887	838	HPA:051010_22	HPA	stomach 1; glandular cells[Approved,Medium]
MSBB.ExN	0.00149099	2780	1887	619	HPA:007010_22	HPA	cerebellum; Purkinje cells[Approved,Medium]
MSBB.Astro	0.00149177	104	110	8	KEGG:04659	KEGG	Th17 cell differentiation
MSBB.ExN	0.00149579	126	2883	38	GO:0048675	GO:BP	axon extension
MSBB.ExN	0.00149579	126	2883	38	GO:0022612	GO:BP	gland morphogenesis
MSBB.Oligo	0.00149869	16	505	5	GO:0001946	GO:BP	lymphangiogenesis
ROSMAP.ExN	0.00149883	4186	792	236	GO:0010556	GO:BP	regulation of macromolecule biosynthetic process
MSBB.Astro	0.00150545	173	204	9	GO:0005775	GO:CC	vacuolar lumen
ROSMAP.ExN	0.00150743	486	792	43	GO:1901987	GO:BP	regulation of cell cycle phase transition
Mayo.Astro	0.00151168	6630	305	147	GO:0032502	GO:BP	developmental process
ROSMAP.ExN	0.00151251	1694	820	106	GO:0098805	GO:CC	whole membrane
ROSMAP.ExN	0.00151362	165	792	21	GO:0016482	GO:BP	cytosolic transport
MSBB.ExN	0.00151721	200	2883	54	GO:0050657	GO:BP	nucleic acid transport
MSBB.ExN	0.00151721	200	2883	54	GO:0050658	GO:BP	RNA transport
MSBB.ExN	0.00151819	47	2883	19	GO:0021795	GO:BP	cerebral cortex cell migration
Mayo.ExN	0.00152697	1177	1266	120	GO:0032989	GO:BP	cellular component morphogenesis
Mayo.ExN	0.00152697	305	1266	42	GO:0050890	GO:BP	cognition
Mayo.Astro	0.00153656	70	315	7	GO:0044304	GO:CC	main axon
Mayo.ExN	0.00153662	56	1266	14	GO:0006120	GO:BP	mitochondrial electron transport, NADH to ubiquinone
MSBB.ExN	0.00153938	1652	1887	384	HPA:024010_22	HPA	kidney; cells in glomeruli[Approved,Medium]
Mayo.ExN	0.001554	2693	1266	242	GO:0009056	GO:BP	catabolic process
MSBB.Oligo	0.00155986	442	505	28	GO:0042391	GO:BP	regulation of membrane potential
MSBB.ExN	0.00156355	205	2883	55	GO:0007626	GO:BP	locomotory behavior
Mayo.Astro	0.00157594	1068	310	37	GO:0022857	GO:MF	transmembrane transporter activity
MSBB.ExN	0.0015809	608	2883	134	GO:0048598	GO:BP	embryonic morphogenesis
MSBB.ExN	0.00158679	2855	1887	634	HPA:043010_21	HPA	skin 1; Langerhans[Approved,Low]
MSBB.ExN	0.00159667	399	2883	94	GO:0030900	GO:BP	forebrain development
MSBB.ExN	0.00162023	15	2975	9	GO:0071565	GO:CC	nBAF complex
MSBB.Oligo	0.00163514	922	505	47	GO:0030001	GO:BP	metal ion transport
Mayo.Oligo	0.00163764	61	1009	13	GO:0060997	GO:BP	dendritic spine morphogenesis
MSBB.ExN	0.00164875	3677	1887	801	HPA:001040_22	HPA	adrenal gland; glandular cells[Approved,Medium]
MSBB.ExN	0.00164875	1550	1887	362	HPA:048030_22	HPA	soft tissue 2; fibroblasts[Approved,Medium]
Mayo.Oligo	0.00165149	383	1009	42	GO:0032535	GO:BP	regulation of cellular component size
Mayo.ExN	0.00165238	119	1266	22	GO:2000736	GO:BP	regulation of stem cell differentiation
Mayo.ExN	0.00165238	145	1266	25	GO:0006119	GO:BP	oxidative phosphorylation
Mayo.ExN	0.00165238	2314	1266	212	GO:0044248	GO:BP	cellular catabolic process
Mayo.Oligo	0.00165741	400	1047	45	GO:0004842	GO:MF	ubiquitin-protein transferase activity
MSBB.ExN	0.00165786	1407	2883	279	GO:0022402	GO:BP	cell cycle process
MSBB.Oligo	0.00166672	352	505	24	GO:1904062	GO:BP	regulation of cation transmembrane transport
Mayo.Oligo	0.00166886	579	1009	57	GO:0010720	GO:BP	positive regulation of cell development
Mayo.Oligo	0.00167991	159	1009	23	GO:0010770	GO:BP	positive regulation of cell morphogenesis involved in differentiation
ROSMAP.ExN	0.00168047	762	820	56	GO:0099513	GO:CC	polymeric cytoskeletal fiber
MSBB.Oligo	0.00168065	94	505	11	GO:0030510	GO:BP	regulation of BMP signaling pathway
MSBB.Astro	0.00168414	217	204	10	GO:0030658	GO:CC	transport vesicle membrane
Mayo.Astro	0.00168419	201	305	13	GO:0099504	GO:BP	synaptic vesicle cycle
Mayo.Astro	0.00168512	830	310	31	GO:0015318	GO:MF	inorganic molecular entity transmembrane transporter activity
Mayo.Oligo	0.00169365	77	1057	14	GO:0099060	GO:CC	integral component of postsynaptic specialization membrane
MSBB.Oligo	0.00169777	871	505	45	GO:0098660	GO:BP	inorganic ion transmembrane transport
MSBB.Oligo	0.00169777	184	505	16	GO:2000181	GO:BP	negative regulation of blood vessel morphogenesis
Mayo.ExN	0.0017002	43	1266	12	GO:1903146	GO:BP	regulation of autophagy of mitochondrion
MSBB.ExN	0.00170267	231	1295	62	KEGG:04014	KEGG	Ras signaling pathway
ROSMAP.ExN	0.00170656	83	792	14	GO:0035418	GO:BP	protein localization to synapse
ROSMAP.ExN	0.00170656	20	792	7	GO:0016082	GO:BP	synaptic vesicle priming
MSBB.ExN	0.00171294	182	2883	50	GO:0006611	GO:BP	protein export from nucleus
MSBB.ExN	0.00171635	14	2883	9	GO:0002566	GO:BP	somatic diversification of immune receptors via somatic mutation
MSBB.ExN	0.00171635	14	2883	9	GO:0021781	GO:BP	glial cell fate commitment
MSBB.ExN	0.00171635	359	2883	86	GO:0006913	GO:BP	nucleocytoplasmic transport
Mayo.Oligo	0.00172002	2252	1009	170	GO:0006928	GO:BP	movement of cell or subcellular component
Mayo.ExN	0.00172393	52	1314	12	GO:0030120	GO:CC	vesicle coat
MSBB.Oligo	0.00172413	9	505	4	GO:0010692	GO:BP	regulation of alkaline phosphatase activity
MSBB.Oligo	0.00172413	9	505	4	GO:0061043	GO:BP	regulation of vascular wound healing
MSBB.Oligo	0.00172413	9	505	4	GO:0048251	GO:BP	elastic fiber assembly
MSBB.ExN	0.00172649	118	2883	36	GO:0006096	GO:BP	glycolytic process
Mayo.Astro	0.0017347	496	305	22	GO:0050769	GO:BP	positive regulation of neurogenesis
Mayo.Astro	0.0017347	147	305	11	GO:0030534	GO:BP	adult behavior
Mayo.Oligo	0.00174337	592	1057	56	GO:0044297	GO:CC	cell body
MSBB.Oligo	0.00174354	121	512	12	GO:0005884	GO:CC	actin filament
MSBB.ExN	0.0017462	3575	1887	780	HPA:033010_21	HPA	parathyroid gland; glandular cells[Approved,Low]
Mayo.Oligo	0.0017508	379	1057	40	GO:0031984	GO:CC	organelle subcompartment
Mayo.Oligo	0.0017508	128	1057	19	GO:0098936	GO:CC	intrinsic component of postsynaptic membrane
MSBB.ExN	0.001751	127	2883	38	GO:0046031	GO:BP	ADP metabolic process
Mayo.Astro	0.00175221	122	305	10	GO:0007613	GO:BP	memory
MSBB.ExN	0.00175393	807	2975	166	GO:1990234	GO:CC	transferase complex
MSBB.ExN	0.00176072	206	2883	55	GO:0007266	GO:BP	Rho protein signal transduction
MSBB.ExN	0.00176444	289	2883	72	GO:0007018	GO:BP	microtubule-based movement
MSBB.ExN	0.00177041	159	2883	45	GO:0010770	GO:BP	positive regulation of cell morphogenesis involved in differentiation
MSBB.Oligo	0.00177184	354	505	24	GO:0001101	GO:BP	response to acid chemical
Mayo.Astro	0.00177309	18	315	4	GO:0043194	GO:CC	axon initial segment
MSBB.Oligo	0.00177604	79	505	10	GO:0060415	GO:BP	muscle tissue morphogenesis
MSBB.Oligo	0.00177604	185	505	16	GO:0048771	GO:BP	tissue remodeling
MSBB.Oligo	0.00178086	332	505	23	GO:0060562	GO:BP	epithelial tube morphogenesis
MSBB.Oligo	0.00178533	166	505	15	GO:0007519	GO:BP	skeletal muscle tissue development
MSBB.ExN	0.00180668	2239	2883	424	GO:1901575	GO:BP	organic substance catabolic process
Mayo.ExN	0.00181298	50	1266	13	GO:0008038	GO:BP	neuron recognition
Mayo.Oligo	0.00181449	24	1009	8	GO:0036010	GO:BP	protein localization to endosome
Mayo.Oligo	0.00181449	3356	1009	239	GO:0051239	GO:BP	regulation of multicellular organismal process
MSBB.Micro	0.00181472	2172	362	68	GO:0043230	GO:CC	extracellular organelle
Mayo.ExN	0.00182267	25	1314	8	GO:0030125	GO:CC	clathrin vesicle coat
MSBB.ExN	0.00182587	245	2883	63	GO:0043122	GO:BP	regulation of I-kappaB kinase/NF-kappaB signaling
MSBB.ExN	0.0018479	250	2883	64	GO:0015931	GO:BP	nucleobase-containing compound transport
MSBB.Oligo	0.00185003	19	512	5	GO:0043034	GO:CC	costamere
MSBB.Oligo	0.00185509	544	505	32	GO:0009991	GO:BP	response to extracellular stimulus
Mayo.ExN	0.00187234	14	1314	6	GO:1902710	GO:CC	GABA receptor complex
Mayo.ExN	0.00187984	225	1314	31	GO:0034703	GO:CC	cation channel complex
Mayo.ExN	0.00188204	7	1266	5	GO:0010807	GO:BP	regulation of synaptic vesicle priming
MSBB.ExN	0.00188206	9	2883	7	GO:0072386	GO:BP	plus-end-directed organelle transport along microtubule
MSBB.ExN	0.00188357	101	2883	32	GO:0048709	GO:BP	oligodendrocyte differentiation
MSBB.ExN	0.00188357	350	2883	84	GO:0010721	GO:BP	negative regulation of cell development
MSBB.Oligo	0.00188417	247	505	19	GO:0048705	GO:BP	skeletal system morphogenesis
MSBB.Oligo	0.00188453	130	505	13	GO:0003206	GO:BP	cardiac chamber morphogenesis
Mayo.Astro	0.00189436	122	310	10	GO:0005262	GO:MF	calcium channel activity
MSBB.Oligo	0.00189837	545	505	32	GO:1901652	GO:BP	response to peptide
Mayo.Oligo	0.00190834	275	1009	33	GO:0072659	GO:BP	protein localization to plasma membrane
MSBB.ExN	0.00193949	2010	2883	384	GO:0040011	GO:BP	locomotion
Mayo.ExN	0.00194221	279	1266	39	GO:0110053	GO:BP	regulation of actin filament organization
Mayo.ExN	0.00194221	1634	1266	157	GO:0055085	GO:BP	transmembrane transport
Mayo.Astro	0.00194554	205	305	13	GO:0007626	GO:BP	locomotory behavior
Mayo.Astro	0.00194554	124	305	10	GO:0016079	GO:BP	synaptic vesicle exocytosis
Mayo.Astro	0.00194554	395	305	19	GO:0031346	GO:BP	positive regulation of cell projection organization
Mayo.Astro	0.00194554	13	305	4	GO:0016322	GO:BP	neuron remodeling
MSBB.Astro	0.00194589	109	110	8	KEGG:05145	KEGG	Toxoplasmosis
MSBB.ExN	0.00194783	231	2883	60	GO:0032886	GO:BP	regulation of microtubule-based process
MSBB.Oligo	0.00195182	269	505	20	GO:0032412	GO:BP	regulation of ion transmembrane transporter activity
Mayo.ExN	0.00196869	147	1266	25	GO:0060078	GO:BP	regulation of postsynaptic membrane potential
Mayo.ExN	0.00196869	174	1266	28	GO:1990138	GO:BP	neuron projection extension
Mayo.ExN	0.00196869	531	1266	63	GO:0061564	GO:BP	axon development
Mayo.ExN	0.00196869	20	1266	8	GO:0045956	GO:BP	positive regulation of calcium ion-dependent exocytosis
MSBB.ExN	0.00198536	665	2883	144	GO:0006897	GO:BP	endocytosis
Mayo.Oligo	0.00198539	1917	1009	148	GO:0031399	GO:BP	regulation of protein modification process
MSBB.Oligo	0.00200289	3742	505	141	GO:0009893	GO:BP	positive regulation of metabolic process
MSBB.ExN	0.00200789	3268	1887	717	HPA:046010_21	HPA	smooth muscle; smooth muscle cells[Approved,Low]
MSBB.ExN	0.0020283	119	2883	36	GO:0006757	GO:BP	ATP generation from ADP
MSBB.Oligo	0.00202885	801	505	42	GO:0060322	GO:BP	head development
MSBB.ExN	0.00204515	2823	1887	626	HPA:014020_22	HPA	endometrium 2; glandular cells[Approved,Medium]
MSBB.ExN	0.00205855	330	1295	82	KEGG:05165	KEGG	Human papillomavirus infection
MSBB.Oligo	0.00206588	724	505	39	GO:0032870	GO:BP	cellular response to hormone stimulus
MSBB.Oligo	0.00207855	1749	505	76	GO:0042127	GO:BP	regulation of cell population proliferation
MSBB.ExN	0.00210696	927	2883	192	GO:0032446	GO:BP	protein modification by small protein conjugation
MSBB.ExN	0.00211261	151	2883	43	GO:0060041	GO:BP	retina development in camera-type eye
Mayo.ExN	0.00213819	61	1314	13	GO:0032589	GO:CC	neuron projection membrane
Mayo.Astro	0.00215314	148	114	10	KEGG:04723	KEGG	Retrograde endocannabinoid signaling
MSBB.Oligo	0.00215542	293	505	21	GO:0032409	GO:BP	regulation of transporter activity
MSBB.Oligo	0.00215542	66	505	9	GO:0055008	GO:BP	cardiac muscle tissue morphogenesis
MSBB.ExN	0.00215774	296	2883	73	GO:0060828	GO:BP	regulation of canonical Wnt signaling pathway
MSBB.Oligo	0.00215922	433	508	28	GO:0003779	GO:MF	actin binding
ROSMAP.ExN	0.00216183	339	792	33	GO:0016050	GO:BP	vesicle organization
MSBB.Oligo	0.00216406	453	505	28	GO:0048732	GO:BP	gland development
Mayo.Astro	0.00216548	8	315	3	GO:0099569	GO:CC	presynaptic cytoskeleton
Mayo.Astro	0.00216548	53	315	6	GO:0099061	GO:CC	integral component of postsynaptic density membrane
Mayo.ExN	0.00217415	6308	1299	522	GO:0043167	GO:MF	ion binding
MSBB.Oligo	0.00217451	225	512	17	GO:0034703	GO:CC	cation channel complex
Mayo.ExN	0.00217603	291	1266	40	GO:0031503	GO:BP	protein-containing complex localization
Mayo.ExN	0.00217603	73	1266	16	GO:1902036	GO:BP	regulation of hematopoietic stem cell differentiation
MSBB.ExN	0.00217977	56	2883	21	GO:0097120	GO:BP	receptor localization to synapse
MSBB.ExN	0.00217977	203	2883	54	GO:0051168	GO:BP	nuclear export
MSBB.Oligo	0.00218345	2092	512	84	GO:0098588	GO:CC	bounding membrane of organelle
Mayo.Oligo	0.00218623	640	1009	61	GO:0005975	GO:BP	carbohydrate metabolic process
MSBB.Oligo	0.00219179	39	505	7	GO:0043114	GO:BP	regulation of vascular permeability
MSBB.ExN	0.00222276	156	2883	44	GO:0061351	GO:BP	neural precursor cell proliferation
MSBB.ExN	0.00222276	362	2883	86	GO:0051169	GO:BP	nuclear transport
MSBB.ExN	0.00224684	1853	2883	356	GO:0051240	GO:BP	positive regulation of multicellular organismal process
MSBB.ExN	0.00224684	1206	2883	242	GO:0051248	GO:BP	negative regulation of protein metabolic process
Mayo.ExN	0.0022469	11	1266	6	GO:0016188	GO:BP	synaptic vesicle maturation
Mayo.ExN	0.0022469	11	1266	6	GO:0070142	GO:BP	synaptic vesicle budding
MSBB.ExN	0.00224971	1050	2883	214	GO:1902533	GO:BP	positive regulation of intracellular signal transduction
MSBB.Oligo	0.00225413	1184	505	56	GO:0034220	GO:BP	ion transmembrane transport
ROSMAP.ExN	0.00226409	711	792	56	GO:0032990	GO:BP	cell part morphogenesis
Mayo.Oligo	0.00226945	1861	1009	144	GO:0019220	GO:BP	regulation of phosphate metabolic process
Mayo.ExN	0.00227245	3742	1266	321	GO:0009893	GO:BP	positive regulation of metabolic process
MSBB.ExN	0.00227246	120	1295	37	KEGG:05135	KEGG	Yersinia infection
Mayo.ExN	0.00227868	149	573	25	KEGG:04932	KEGG	Non-alcoholic fatty liver disease (NAFLD)
MSBB.ExN	0.00228087	342	2883	82	GO:0043405	GO:BP	regulation of MAP kinase activity
Mayo.ExN	0.0022874	374	1266	48	GO:0031331	GO:BP	positive regulation of cellular catabolic process
Mayo.ExN	0.00228796	86	1314	16	GO:0120111	GO:CC	neuron projection cytoplasm
Mayo.Oligo	0.00231292	1862	1009	144	GO:0051174	GO:BP	regulation of phosphorus metabolic process
MSBB.Oligo	0.00233318	781	505	41	GO:0098662	GO:BP	inorganic cation transmembrane transport
MSBB.ExN	0.00233612	111	2883	34	GO:0045185	GO:BP	maintenance of protein location
MSBB.ExN	0.00233612	414	2883	96	GO:0010639	GO:BP	negative regulation of organelle organization
Mayo.Oligo	0.00233895	39	1009	10	GO:0001941	GO:BP	postsynaptic membrane organization
Mayo.Astro	0.0023416	154	315	10	GO:0043204	GO:CC	perikaryon
ROSMAP.ExN	0.00234715	5898	820	305	GO:0043233	GO:CC	organelle lumen
ROSMAP.ExN	0.00234715	5898	820	305	GO:0031974	GO:CC	membrane-enclosed lumen
ROSMAP.ExN	0.00234715	5898	820	305	GO:0070013	GO:CC	intracellular organelle lumen
MSBB.Oligo	0.0023658	152	505	14	GO:0051592	GO:BP	response to calcium ion
MSBB.Oligo	0.00237297	553	505	32	GO:1901615	GO:BP	organic hydroxy compound metabolic process
Mayo.Astro	0.00237763	153	114	10	KEGG:04921	KEGG	Oxytocin signaling pathway
Mayo.ExN	0.00238178	5898	1314	468	GO:0070013	GO:CC	intracellular organelle lumen
Mayo.ExN	0.00238178	5898	1314	468	GO:0043233	GO:CC	organelle lumen
Mayo.ExN	0.00238178	5898	1314	468	GO:0031974	GO:CC	membrane-enclosed lumen
MSBB.Astro	0.00239921	144	110	9	KEGG:04514	KEGG	Cell adhesion molecules (CAMs)
Mayo.Oligo	0.00241775	47	1009	11	GO:0099054	GO:BP	presynapse assembly
Mayo.Oligo	0.00241775	5605	1009	373	GO:0048522	GO:BP	positive regulation of cellular process
Mayo.Oligo	0.00241775	101	1009	17	GO:0060996	GO:BP	dendritic spine development
Mayo.ExN	0.0024276	70	1314	14	GO:0044304	GO:CC	main axon
MSBB.Oligo	0.00243873	2288	512	90	GO:0042995	GO:CC	cell projection
MSBB.Oligo	0.00243873	207	512	16	GO:0030017	GO:CC	sarcomere
Mayo.Astro	0.00244694	103	305	9	GO:0060079	GO:BP	excitatory postsynaptic potential
Mayo.ExN	0.00246034	334	1314	41	GO:0098589	GO:CC	membrane region
MSBB.Oligo	0.00246054	724	512	37	GO:0048471	GO:CC	perinuclear region of cytoplasm
MSBB.Oligo	0.00246612	142	508	14	GO:0019838	GO:MF	growth factor binding
MSBB.Oligo	0.00246929	2200	512	87	GO:0120025	GO:CC	plasma membrane bounded cell projection
MSBB.Oligo	0.00246929	320	512	21	GO:0045121	GO:CC	membrane raft
Mayo.Oligo	0.00246982	613	1047	61	GO:0004672	GO:MF	protein kinase activity
MSBB.Oligo	0.00247328	53	505	8	GO:0072132	GO:BP	mesenchyme morphogenesis
Mayo.ExN	0.00247663	59	1266	14	GO:0099518	GO:BP	vesicle cytoskeletal trafficking
Mayo.ExN	0.00247663	922	1266	97	GO:0030001	GO:BP	metal ion transport
MSBB.Micro	0.00248937	785	362	32	GO:0070161	GO:CC	anchoring junction
MSBB.Micro	0.00248937	2167	362	67	GO:1903561	GO:CC	extracellular vesicle
MSBB.Micro	0.00248937	11634	362	259	GO:0005737	GO:CC	cytoplasm
MSBB.Oligo	0.00252258	321	512	21	GO:0098857	GO:CC	membrane microdomain
MSBB.ExN	0.00252586	107	2883	33	GO:0043149	GO:BP	stress fiber assembly
MSBB.ExN	0.00252586	107	2883	33	GO:0030038	GO:BP	contractile actin filament bundle assembly
MSBB.Astro	0.00253034	50	204	5	GO:0043209	GO:CC	myelin sheath
MSBB.Astro	0.00253768	935	204	23	GO:0005768	GO:CC	endosome
Mayo.Astro	0.00254072	623	305	25	GO:0044057	GO:BP	regulation of system process
Mayo.Oligo	0.0025411	22	1057	7	GO:0071782	GO:CC	endoplasmic reticulum tubular network
Mayo.ExN	0.00254701	10	1314	5	GO:0098833	GO:CC	presynaptic endocytic zone
MSBB.Astro	0.0025498	422	204	14	GO:0005774	GO:CC	vacuolar membrane
[truncated: 2,733 more rows]
